# Supplementary material for: Repurposing FDA-approved phytomedicines, natural products, antivirals and cell protectives against SARS-CoV-2 (COVID-19) RNA-dependent RNA polymerase
Source: PeerJ. 2020 Nov 30;8:e10480. doi: 10.7717/peerj.10480 (PMC7713599; doi:10.7717/peerj.10480)
Supplement: Supplemental Information 7 — The data were obtained after 100 ns simulation. [file peerj-08-10480-s007.xlsx]

## Sheet: rmsd
0	0.0005028	Docetaxel	0	0.0004976	Neohespridin		Time (ns)	Docetaxel	Neohespridin
0.01	0.097498		0.01	0.092962			0	0.0005028	0.0004976
0.02	0.102477		0.02	0.104063			0.01	0.097498	0.092962
0.03	0.111109		0.03	0.110131			0.02	0.102477	0.104063
0.04	0.124599		0.04	0.113533			0.03	0.111109	0.110131
0.05	0.130083		0.05	0.107677			0.04	0.124599	0.113533
0.06	0.124098		0.06	0.110708			0.05	0.130083	0.107677
0.07	0.128107		0.07	0.115024			0.06	0.124098	0.110708
0.08	0.123986		0.08	0.116465			0.07	0.128107	0.115024
0.09	0.125582		0.09	0.121409			0.08	0.123986	0.116465
0.1	0.122968		0.1	0.126002			0.09	0.125582	0.121409
0.11	0.126106		0.11	0.127267			0.1	0.122968	0.126002
0.12	0.133183		0.12	0.136211			0.11	0.126106	0.127267
0.13	0.128162		0.13	0.147209			0.12	0.133183	0.136211
0.14	0.132407		0.14	0.142718			0.13	0.128162	0.147209
0.15	0.13463		0.15	0.139886			0.14	0.132407	0.142718
0.16	0.133431		0.16	0.141295			0.15	0.13463	0.139886
0.17	0.141109		0.17	0.141255			0.16	0.133431	0.141295
0.18	0.155309		0.18	0.136761			0.17	0.141109	0.141255
0.19	0.153667		0.19	0.1398			0.18	0.155309	0.136761
0.2	0.150434		0.2	0.14472			0.19	0.153667	0.1398
0.21	0.150071		0.21	0.1411			0.2	0.150434	0.14472
0.22	0.151858		0.22	0.156467			0.21	0.150071	0.1411
0.23	0.155359		0.23	0.167179			0.22	0.151858	0.156467
0.24	0.159038		0.24	0.164366			0.23	0.155359	0.167179
0.25	0.152544		0.25	0.158693			0.24	0.159038	0.164366
0.26	0.151054		0.26	0.163885			0.25	0.152544	0.158693
0.27	0.143802		0.27	0.165076			0.26	0.151054	0.163885
0.28	0.138982		0.28	0.152873			0.27	0.143802	0.165076
0.29	0.149972		0.29	0.165577			0.28	0.138982	0.152873
0.3	0.147169		0.3	0.177435			0.29	0.149972	0.165577
0.31	0.15539		0.31	0.170513			0.3	0.147169	0.177435
0.32	0.184459		0.32	0.159934			0.31	0.15539	0.170513
0.33	0.1817		0.33	0.167201			0.32	0.184459	0.159934
0.34	0.207702		0.34	0.158408			0.33	0.1817	0.167201
0.35	0.182384		0.35	0.177922			0.34	0.207702	0.158408
0.36	0.178275		0.36	0.171238			0.35	0.182384	0.177922
0.37	0.181266		0.37	0.167292			0.36	0.178275	0.171238
0.38	0.188452		0.38	0.171728			0.37	0.181266	0.167292
0.39	0.176162		0.39	0.162408			0.38	0.188452	0.171728
0.4	0.19189		0.4	0.169214			0.39	0.176162	0.162408
0.41	0.185194		0.41	0.162417			0.4	0.19189	0.169214
0.42	0.186657		0.42	0.180587			0.41	0.185194	0.162417
0.43	0.203585		0.43	0.182915			0.42	0.186657	0.180587
0.44	0.197668		0.44	0.177774			0.43	0.203585	0.182915
0.45	0.213736		0.45	0.182231			0.44	0.197668	0.177774
0.46	0.220831		0.46	0.174788			0.45	0.213736	0.182231
0.47	0.227576		0.47	0.180309			0.46	0.220831	0.174788
0.48	0.222404		0.48	0.16831			0.47	0.227576	0.180309
0.49	0.21326		0.49	0.166104			0.48	0.222404	0.16831
0.5	0.215711		0.5	0.157475			0.49	0.21326	0.166104
0.51	0.193996		0.51	0.169318			0.5	0.215711	0.157475
0.52	0.217915		0.52	0.160495			0.51	0.193996	0.169318
0.53	0.202523		0.53	0.166033			0.52	0.217915	0.160495
0.54	0.200263		0.54	0.173148			0.53	0.202523	0.166033
0.55	0.19687		0.55	0.173198			0.54	0.200263	0.173148
0.56	0.203297		0.56	0.178294			0.55	0.19687	0.173198
0.57	0.202072		0.57	0.176997			0.56	0.203297	0.178294
0.58	0.200073		0.58	0.165622			0.57	0.202072	0.176997
0.59	0.191548		0.59	0.157851			0.58	0.200073	0.165622
0.6	0.183431		0.6	0.166209			0.59	0.191548	0.157851
0.61	0.197493		0.61	0.16494			0.6	0.183431	0.166209
0.62	0.192945		0.62	0.165102			0.61	0.197493	0.16494
0.63	0.179351		0.63	0.16408			0.62	0.192945	0.165102
0.64	0.189932		0.64	0.158712			0.63	0.179351	0.16408
0.65	0.178551		0.65	0.161442			0.64	0.189932	0.158712
0.66	0.171154		0.66	0.154852			0.65	0.178551	0.161442
0.67	0.173545		0.67	0.15366			0.66	0.171154	0.154852
0.68	0.1764		0.68	0.143818			0.67	0.173545	0.15366
0.69	0.177413		0.69	0.148581			0.68	0.1764	0.143818
0.7	0.187221		0.7	0.150801			0.69	0.177413	0.148581
0.71	0.186366		0.71	0.155233			0.7	0.187221	0.150801
0.72	0.192871		0.72	0.154961			0.71	0.186366	0.155233
0.73	0.193101		0.73	0.148172			0.72	0.192871	0.154961
0.74	0.199882		0.74	0.150572			0.73	0.193101	0.148172
0.75	0.201858		0.75	0.153448			0.74	0.199882	0.150572
0.76	0.19808		0.76	0.161582			0.75	0.201858	0.153448
0.77	0.209893		0.77	0.161916			0.76	0.19808	0.161582
0.78	0.212821		0.78	0.150601			0.77	0.209893	0.161916
0.79	0.208385		0.79	0.160258			0.78	0.212821	0.150601
0.8	0.209367		0.8	0.149789			0.79	0.208385	0.160258
0.81	0.191981		0.81	0.152771			0.8	0.209367	0.149789
0.82	0.203524		0.82	0.156351			0.81	0.191981	0.152771
0.83	0.200015		0.83	0.148223			0.82	0.203524	0.156351
0.84	0.197064		0.84	0.144856			0.83	0.200015	0.148223
0.85	0.20782		0.85	0.146751			0.84	0.197064	0.144856
0.86	0.203765		0.86	0.136574			0.85	0.20782	0.146751
0.87	0.189695		0.87	0.140277			0.86	0.203765	0.136574
0.88	0.18808		0.88	0.143603			0.87	0.189695	0.140277
0.89	0.185736		0.89	0.148292			0.88	0.18808	0.143603
0.9	0.191317		0.9	0.144105			0.89	0.185736	0.148292
0.91	0.19429		0.91	0.142415			0.9	0.191317	0.144105
0.92	0.199532		0.92	0.146579			0.91	0.19429	0.142415
0.93	0.193058		0.93	0.15031			0.92	0.199532	0.146579
0.94	0.195835		0.94	0.150105			0.93	0.193058	0.15031
0.95	0.198192		0.95	0.147161			0.94	0.195835	0.150105
0.96	0.205227		0.96	0.151794			0.95	0.198192	0.147161
0.97	0.199024		0.97	0.164172			0.96	0.205227	0.151794
0.98	0.200942		0.98	0.161426			0.97	0.199024	0.164172
0.99	0.199074		0.99	0.164487			0.98	0.200942	0.161426
1	0.18424		1	0.159414			0.99	0.199074	0.164487
1.01	0.183764		1.01	0.163609			1	0.18424	0.159414
1.02	0.192348		1.02	0.179176			1.01	0.183764	0.163609
1.03	0.192252		1.03	0.179325			1.02	0.192348	0.179176
1.04	0.195313		1.04	0.170685			1.03	0.192252	0.179325
1.05	0.197848		1.05	0.170418			1.04	0.195313	0.170685
1.06	0.197679		1.06	0.167942			1.05	0.197848	0.170418
1.07	0.195374		1.07	0.165393			1.06	0.197679	0.167942
1.08	0.187511		1.08	0.17722			1.07	0.195374	0.165393
1.09	0.192523		1.09	0.165892			1.08	0.187511	0.17722
1.1	0.201351		1.1	0.158823			1.09	0.192523	0.165892
1.11	0.199932		1.11	0.156725			1.1	0.201351	0.158823
1.12	0.192936		1.12	0.155766			1.11	0.199932	0.156725
1.13	0.181068		1.13	0.159718			1.12	0.192936	0.155766
1.14	0.190472		1.14	0.164897			1.13	0.181068	0.159718
1.15	0.191015		1.15	0.160378			1.14	0.190472	0.164897
1.16	0.201777		1.16	0.155616			1.15	0.191015	0.160378
1.17	0.192632		1.17	0.158521			1.16	0.201777	0.155616
1.18	0.183434		1.18	0.166964			1.17	0.192632	0.158521
1.19	0.188876		1.19	0.166295			1.18	0.183434	0.166964
1.2	0.184494		1.2	0.160646			1.19	0.188876	0.166295
1.21	0.171641		1.21	0.167325			1.2	0.184494	0.160646
1.22	0.154708		1.22	0.16189			1.21	0.171641	0.167325
1.23	0.159598		1.23	0.171302			1.22	0.154708	0.16189
1.24	0.162582		1.24	0.172363			1.23	0.159598	0.171302
1.25	0.173703		1.25	0.182989			1.24	0.162582	0.172363
1.26	0.171983		1.26	0.177564			1.25	0.173703	0.182989
1.27	0.178858		1.27	0.177459			1.26	0.171983	0.177564
1.28	0.173065		1.28	0.178125			1.27	0.178858	0.177459
1.29	0.160876		1.29	0.173849			1.28	0.173065	0.178125
1.3	0.159674		1.3	0.173052			1.29	0.160876	0.173849
1.31	0.170651		1.31	0.176104			1.3	0.159674	0.173052
1.32	0.174101		1.32	0.189342			1.31	0.170651	0.176104
1.33	0.183004		1.33	0.185577			1.32	0.174101	0.189342
1.34	0.184463		1.34	0.19964			1.33	0.183004	0.185577
1.35	0.184116		1.35	0.189841			1.34	0.184463	0.19964
1.36	0.178785		1.36	0.182781			1.35	0.184116	0.189841
1.37	0.18863		1.37	0.175757			1.36	0.178785	0.182781
1.38	0.187585		1.38	0.181397			1.37	0.18863	0.175757
1.39	0.173038		1.39	0.177433			1.38	0.187585	0.181397
1.4	0.180776		1.4	0.171312			1.39	0.173038	0.177433
1.41	0.188498		1.41	0.182551			1.4	0.180776	0.171312
1.42	0.186786		1.42	0.182536			1.41	0.188498	0.182551
1.43	0.181792		1.43	0.169952			1.42	0.186786	0.182536
1.44	0.177712		1.44	0.182786			1.43	0.181792	0.169952
1.45	0.178169		1.45	0.177908			1.44	0.177712	0.182786
1.46	0.192426		1.46	0.173687			1.45	0.178169	0.177908
1.47	0.184056		1.47	0.170387			1.46	0.192426	0.173687
1.48	0.188593		1.48	0.167033			1.47	0.184056	0.170387
1.49	0.176582		1.49	0.172589			1.48	0.188593	0.167033
1.5	0.17455		1.5	0.181565			1.49	0.176582	0.172589
1.51	0.177943		1.51	0.170007			1.5	0.17455	0.181565
1.52	0.177357		1.52	0.171847			1.51	0.177943	0.170007
1.53	0.185041		1.53	0.177382			1.52	0.177357	0.171847
1.54	0.183612		1.54	0.162998			1.53	0.185041	0.177382
1.55	0.193591		1.55	0.167267			1.54	0.183612	0.162998
1.56	0.190154		1.56	0.168985			1.55	0.193591	0.167267
1.57	0.18449		1.57	0.158246			1.56	0.190154	0.168985
1.58	0.191207		1.58	0.163321			1.57	0.18449	0.158246
1.59	0.191017		1.59	0.152781			1.58	0.191207	0.163321
1.6	0.198895		1.6	0.157451			1.59	0.191017	0.152781
1.61	0.204604		1.61	0.166107			1.6	0.198895	0.157451
1.62	0.195712		1.62	0.165595			1.61	0.204604	0.166107
1.63	0.198674		1.63	0.174309			1.62	0.195712	0.165595
1.64	0.204756		1.64	0.165779			1.63	0.198674	0.174309
1.65	0.192055		1.65	0.165424			1.64	0.204756	0.165779
1.66	0.211064		1.66	0.16231			1.65	0.192055	0.165424
1.67	0.214539		1.67	0.166506			1.66	0.211064	0.16231
1.68	0.211189		1.68	0.181106			1.67	0.214539	0.166506
1.69	0.201091		1.69	0.170322			1.68	0.211189	0.181106
1.7	0.193781		1.7	0.173428			1.69	0.201091	0.170322
1.71	0.210151		1.71	0.178263			1.7	0.193781	0.173428
1.72	0.209929		1.72	0.17514			1.71	0.210151	0.178263
1.73	0.205807		1.73	0.175758			1.72	0.209929	0.17514
1.74	0.211994		1.74	0.170561			1.73	0.205807	0.175758
1.75	0.220379		1.75	0.155379			1.74	0.211994	0.170561
1.76	0.217754		1.76	0.156893			1.75	0.220379	0.155379
1.77	0.194677		1.77	0.160237			1.76	0.217754	0.156893
1.78	0.206161		1.78	0.163434			1.77	0.194677	0.160237
1.79	0.208733		1.79	0.165415			1.78	0.206161	0.163434
1.8	0.203943		1.8	0.160654			1.79	0.208733	0.165415
1.81	0.21326		1.81	0.161149			1.8	0.203943	0.160654
1.82	0.210984		1.82	0.16213			1.81	0.21326	0.161149
1.83	0.198508		1.83	0.153184			1.82	0.210984	0.16213
1.84	0.202704		1.84	0.160466			1.83	0.198508	0.153184
1.85	0.195657		1.85	0.166714			1.84	0.202704	0.160466
1.86	0.185461		1.86	0.160424			1.85	0.195657	0.166714
1.87	0.190423		1.87	0.156598			1.86	0.185461	0.160424
1.88	0.190176		1.88	0.155554			1.87	0.190423	0.156598
1.89	0.200447		1.89	0.15844			1.88	0.190176	0.155554
1.9	0.198074		1.9	0.165092			1.89	0.200447	0.15844
1.91	0.197754		1.91	0.157217			1.9	0.198074	0.165092
1.92	0.19737		1.92	0.154852			1.91	0.197754	0.157217
1.93	0.179504		1.93	0.154915			1.92	0.19737	0.154852
1.94	0.182861		1.94	0.1505			1.93	0.179504	0.154915
1.95	0.192152		1.95	0.156128			1.94	0.182861	0.1505
1.96	0.191112		1.96	0.15015			1.95	0.192152	0.156128
1.97	0.198657		1.97	0.149157			1.96	0.191112	0.15015
1.98	0.20388		1.98	0.159871			1.97	0.198657	0.149157
1.99	0.18901		1.99	0.164618			1.98	0.20388	0.159871
2	0.195078		2	0.165975			1.99	0.18901	0.164618
2.01	0.195459		2.01	0.154182			2	0.195078	0.165975
2.02	0.190515		2.02	0.170653			2.01	0.195459	0.154182
2.03	0.196484		2.03	0.161388			2.02	0.190515	0.170653
2.04	0.207871		2.04	0.15503			2.03	0.196484	0.161388
2.05	0.202209		2.05	0.147907			2.04	0.207871	0.15503
2.06	0.196167		2.06	0.152736			2.05	0.202209	0.147907
2.07	0.20199		2.07	0.158575			2.06	0.196167	0.152736
2.08	0.201865		2.08	0.157664			2.07	0.20199	0.158575
2.09	0.19688		2.09	0.157675			2.08	0.201865	0.157664
2.1	0.185962		2.1	0.165602			2.09	0.19688	0.157675
2.11	0.192574		2.11	0.158848			2.1	0.185962	0.165602
2.12	0.193666		2.12	0.160139			2.11	0.192574	0.158848
2.13	0.192567		2.13	0.157796			2.12	0.193666	0.160139
2.14	0.209797		2.14	0.168071			2.13	0.192567	0.157796
2.15	0.197431		2.15	0.156166			2.14	0.209797	0.168071
2.16	0.192292		2.16	0.161191			2.15	0.197431	0.156166
2.17	0.181508		2.17	0.163866			2.16	0.192292	0.161191
2.18	0.188463		2.18	0.164172			2.17	0.181508	0.163866
2.19	0.188452		2.19	0.16183			2.18	0.188463	0.164172
2.2	0.187567		2.2	0.160379			2.19	0.188452	0.16183
2.21	0.181813		2.21	0.167603			2.2	0.187567	0.160379
2.22	0.181006		2.22	0.155207			2.21	0.181813	0.167603
2.23	0.170765		2.23	0.162903			2.22	0.181006	0.155207
2.24	0.193978		2.24	0.158356			2.23	0.170765	0.162903
2.25	0.206237		2.25	0.157114			2.24	0.193978	0.158356
2.26	0.210093		2.26	0.171209			2.25	0.206237	0.157114
2.27	0.206977		2.27	0.16164			2.26	0.210093	0.171209
2.28	0.213231		2.28	0.1614			2.27	0.206977	0.16164
2.29	0.21265		2.29	0.170567			2.28	0.213231	0.1614
2.3	0.216977		2.3	0.168594			2.29	0.21265	0.170567
2.31	0.212581		2.31	0.154203			2.3	0.216977	0.168594
2.32	0.20615		2.32	0.16346			2.31	0.212581	0.154203
2.33	0.203412		2.33	0.166587			2.32	0.20615	0.16346
2.34	0.202436		2.34	0.177394			2.33	0.203412	0.166587
2.35	0.205597		2.35	0.17782			2.34	0.202436	0.177394
2.36	0.215362		2.36	0.171335			2.35	0.205597	0.17782
2.37	0.214771		2.37	0.167628			2.36	0.215362	0.171335
2.38	0.195931		2.38	0.168586			2.37	0.214771	0.167628
2.39	0.197628		2.39	0.1777			2.38	0.195931	0.168586
2.4	0.201704		2.4	0.175276			2.39	0.197628	0.1777
2.41	0.211498		2.41	0.156035			2.4	0.201704	0.175276
2.42	0.211771		2.42	0.165765			2.41	0.211498	0.156035
2.43	0.214997		2.43	0.163429			2.42	0.211771	0.165765
2.44	0.21004		2.44	0.168262			2.43	0.214997	0.163429
2.45	0.200761		2.45	0.15535			2.44	0.21004	0.168262
2.46	0.202331		2.46	0.153901			2.45	0.200761	0.15535
2.47	0.214353		2.47	0.153683			2.46	0.202331	0.153901
2.48	0.221267		2.48	0.150255			2.47	0.214353	0.153683
2.49	0.204888		2.49	0.149481			2.48	0.221267	0.150255
2.5	0.205791		2.5	0.150506			2.49	0.204888	0.149481
2.51	0.212129		2.51	0.163132			2.5	0.205791	0.150506
2.52	0.197462		2.52	0.149782			2.51	0.212129	0.163132
2.53	0.201933		2.53	0.151001			2.52	0.197462	0.149782
2.54	0.199726		2.54	0.167094			2.53	0.201933	0.151001
2.55	0.188857		2.55	0.175993			2.54	0.199726	0.167094
2.56	0.200245		2.56	0.168961			2.55	0.188857	0.175993
2.57	0.200567		2.57	0.174204			2.56	0.200245	0.168961
2.58	0.197389		2.58	0.162854			2.57	0.200567	0.174204
2.59	0.19098		2.59	0.164499			2.58	0.197389	0.162854
2.6	0.186903		2.6	0.15973			2.59	0.19098	0.164499
2.61	0.206733		2.61	0.155861			2.6	0.186903	0.15973
2.62	0.210493		2.62	0.166139			2.61	0.206733	0.155861
2.63	0.214392		2.63	0.167514			2.62	0.210493	0.166139
2.64	0.208154		2.64	0.179222			2.63	0.214392	0.167514
2.65	0.197142		2.65	0.159891			2.64	0.208154	0.179222
2.66	0.20318		2.66	0.178694			2.65	0.197142	0.159891
2.67	0.203567		2.67	0.181358			2.66	0.20318	0.178694
2.68	0.22558		2.68	0.184247			2.67	0.203567	0.181358
2.69	0.223131		2.69	0.189021			2.68	0.22558	0.184247
2.7	0.215779		2.7	0.177894			2.69	0.223131	0.189021
2.71	0.207076		2.71	0.178739			2.7	0.215779	0.177894
2.72	0.200242		2.72	0.167044			2.71	0.207076	0.178739
2.73	0.197476		2.73	0.162689			2.72	0.200242	0.167044
2.74	0.197198		2.74	0.166875			2.73	0.197476	0.162689
2.75	0.204463		2.75	0.170124			2.74	0.197198	0.166875
2.76	0.200492		2.76	0.160322			2.75	0.204463	0.170124
2.77	0.195585		2.77	0.165878			2.76	0.200492	0.160322
2.78	0.202981		2.78	0.173177			2.77	0.195585	0.165878
2.79	0.18918		2.79	0.177303			2.78	0.202981	0.173177
2.8	0.189553		2.8	0.179624			2.79	0.18918	0.177303
2.81	0.18212		2.81	0.168179			2.8	0.189553	0.179624
2.82	0.184464		2.82	0.166192			2.81	0.18212	0.168179
2.83	0.174209		2.83	0.177713			2.82	0.184464	0.166192
2.84	0.178477		2.84	0.183473			2.83	0.174209	0.177713
2.85	0.18194		2.85	0.186807			2.84	0.178477	0.183473
2.86	0.190375		2.86	0.194684			2.85	0.18194	0.186807
2.87	0.1928		2.87	0.17823			2.86	0.190375	0.194684
2.88	0.195193		2.88	0.183606			2.87	0.1928	0.17823
2.89	0.208118		2.89	0.182388			2.88	0.195193	0.183606
2.9	0.186806		2.9	0.175093			2.89	0.208118	0.182388
2.91	0.18384		2.91	0.175087			2.9	0.186806	0.175093
2.92	0.187578		2.92	0.177578			2.91	0.18384	0.175087
2.93	0.175623		2.93	0.192279			2.92	0.187578	0.177578
2.94	0.177506		2.94	0.174741			2.93	0.175623	0.192279
2.95	0.187055		2.95	0.172498			2.94	0.177506	0.174741
2.96	0.18593		2.96	0.172104			2.95	0.187055	0.172498
2.97	0.177915		2.97	0.168445			2.96	0.18593	0.172104
2.98	0.177243		2.98	0.172335			2.97	0.177915	0.168445
2.99	0.177078		2.99	0.173416			2.98	0.177243	0.172335
3	0.184885		3	0.178971			2.99	0.177078	0.173416
3.01	0.178152		3.01	0.189573			3	0.184885	0.178971
3.02	0.176839		3.02	0.180064			3.01	0.178152	0.189573
3.03	0.181018		3.03	0.177176			3.02	0.176839	0.180064
3.04	0.178263		3.04	0.172035			3.03	0.181018	0.177176
3.05	0.182415		3.05	0.171185			3.04	0.178263	0.172035
3.06	0.182053		3.06	0.175282			3.05	0.182415	0.171185
3.07	0.187074		3.07	0.177309			3.06	0.182053	0.175282
3.08	0.18705		3.08	0.180385			3.07	0.187074	0.177309
3.09	0.191441		3.09	0.185508			3.08	0.18705	0.180385
3.1	0.172382		3.1	0.185067			3.09	0.191441	0.185508
3.11	0.172003		3.11	0.172384			3.1	0.172382	0.185067
3.12	0.170433		3.12	0.166446			3.11	0.172003	0.172384
3.13	0.171909		3.13	0.17088			3.12	0.170433	0.166446
3.14	0.180416		3.14	0.172809			3.13	0.171909	0.17088
3.15	0.173755		3.15	0.174294			3.14	0.180416	0.172809
3.16	0.178201		3.16	0.165997			3.15	0.173755	0.174294
3.17	0.183041		3.17	0.167996			3.16	0.178201	0.165997
3.18	0.189846		3.18	0.170253			3.17	0.183041	0.167996
3.19	0.195134		3.19	0.167731			3.18	0.189846	0.170253
3.2	0.185021		3.2	0.177557			3.19	0.195134	0.167731
3.21	0.186886		3.21	0.173386			3.2	0.185021	0.177557
3.22	0.190628		3.22	0.179863			3.21	0.186886	0.173386
3.23	0.175757		3.23	0.177441			3.22	0.190628	0.179863
3.24	0.183069		3.24	0.172827			3.23	0.175757	0.177441
3.25	0.18856		3.25	0.169005			3.24	0.183069	0.172827
3.26	0.190321		3.26	0.167024			3.25	0.18856	0.169005
3.27	0.185772		3.27	0.168788			3.26	0.190321	0.167024
3.28	0.17534		3.28	0.171944			3.27	0.185772	0.168788
3.29	0.173507		3.29	0.180602			3.28	0.17534	0.171944
3.3	0.184309		3.3	0.172821			3.29	0.173507	0.180602
3.31	0.185863		3.31	0.165582			3.3	0.184309	0.172821
3.32	0.185329		3.32	0.162179			3.31	0.185863	0.165582
3.33	0.191155		3.33	0.169965			3.32	0.185329	0.162179
3.34	0.192836		3.34	0.178255			3.33	0.191155	0.169965
3.35	0.187475		3.35	0.167024			3.34	0.192836	0.178255
3.36	0.203966		3.36	0.177118			3.35	0.187475	0.167024
3.37	0.206852		3.37	0.185976			3.36	0.203966	0.177118
3.38	0.199073		3.38	0.178569			3.37	0.206852	0.185976
3.39	0.203069		3.39	0.173033			3.38	0.199073	0.178569
3.4	0.20845		3.4	0.177111			3.39	0.203069	0.173033
3.41	0.208698		3.41	0.182988			3.4	0.20845	0.177111
3.42	0.218961		3.42	0.187683			3.41	0.208698	0.182988
3.43	0.220131		3.43	0.178564			3.42	0.218961	0.187683
3.44	0.213643		3.44	0.175033			3.43	0.220131	0.178564
3.45	0.206601		3.45	0.166254			3.44	0.213643	0.175033
3.46	0.223825		3.46	0.160625			3.45	0.206601	0.166254
3.47	0.223631		3.47	0.158135			3.46	0.223825	0.160625
3.48	0.199677		3.48	0.160495			3.47	0.223631	0.158135
3.49	0.213073		3.49	0.160255			3.48	0.199677	0.160495
3.5	0.210202		3.5	0.164415			3.49	0.213073	0.160255
3.51	0.218015		3.51	0.166179			3.5	0.210202	0.164415
3.52	0.221455		3.52	0.165205			3.51	0.218015	0.166179
3.53	0.222903		3.53	0.166983			3.52	0.221455	0.165205
3.54	0.219534		3.54	0.163921			3.53	0.222903	0.166983
3.55	0.228533		3.55	0.177092			3.54	0.219534	0.163921
3.56	0.214302		3.56	0.177007			3.55	0.228533	0.177092
3.57	0.210073		3.57	0.18348			3.56	0.214302	0.177007
3.58	0.220129		3.58	0.185944			3.57	0.210073	0.18348
3.59	0.226105		3.59	0.183984			3.58	0.220129	0.185944
3.6	0.254022		3.6	0.169643			3.59	0.226105	0.183984
3.61	0.249873		3.61	0.172175			3.6	0.254022	0.169643
3.62	0.240303		3.62	0.177231			3.61	0.249873	0.172175
3.63	0.248644		3.63	0.178916			3.62	0.240303	0.177231
3.64	0.25216		3.64	0.182735			3.63	0.248644	0.178916
3.65	0.249615		3.65	0.191302			3.64	0.25216	0.182735
3.66	0.241885		3.66	0.188874			3.65	0.249615	0.191302
3.67	0.231052		3.67	0.185877			3.66	0.241885	0.188874
3.68	0.215774		3.68	0.197983			3.67	0.231052	0.185877
3.69	0.222398		3.69	0.182454			3.68	0.215774	0.197983
3.7	0.223659		3.7	0.183545			3.69	0.222398	0.182454
3.71	0.233886		3.71	0.193732			3.7	0.223659	0.183545
3.72	0.246713		3.72	0.183433			3.71	0.233886	0.193732
3.73	0.235957		3.73	0.182035			3.72	0.246713	0.183433
3.74	0.235219		3.74	0.172345			3.73	0.235957	0.182035
3.75	0.225781		3.75	0.170833			3.74	0.235219	0.172345
3.76	0.231401		3.76	0.172461			3.75	0.225781	0.170833
3.77	0.228026		3.77	0.179789			3.76	0.231401	0.172461
3.78	0.224602		3.78	0.183064			3.77	0.228026	0.179789
3.79	0.23386		3.79	0.18458			3.78	0.224602	0.183064
3.8	0.24795		3.8	0.176099			3.79	0.23386	0.18458
3.81	0.236417		3.81	0.174014			3.8	0.24795	0.176099
3.82	0.23138		3.82	0.171605			3.81	0.236417	0.174014
3.83	0.222287		3.83	0.169418			3.82	0.23138	0.171605
3.84	0.215152		3.84	0.167808			3.83	0.222287	0.169418
3.85	0.228605		3.85	0.184728			3.84	0.215152	0.167808
3.86	0.223826		3.86	0.177106			3.85	0.228605	0.184728
3.87	0.21312		3.87	0.178439			3.86	0.223826	0.177106
3.88	0.208515		3.88	0.174537			3.87	0.21312	0.178439
3.89	0.210835		3.89	0.176696			3.88	0.208515	0.174537
3.9	0.227267		3.9	0.175117			3.89	0.210835	0.176696
3.91	0.221825		3.91	0.184284			3.9	0.227267	0.175117
3.92	0.230066		3.92	0.18791			3.91	0.221825	0.184284
3.93	0.238403		3.93	0.198274			3.92	0.230066	0.18791
3.94	0.235628		3.94	0.192047			3.93	0.238403	0.198274
3.95	0.233269		3.95	0.203099			3.94	0.235628	0.192047
3.96	0.244352		3.96	0.207247			3.95	0.233269	0.203099
3.97	0.24337		3.97	0.213173			3.96	0.244352	0.207247
3.98	0.232938		3.98	0.194777			3.97	0.24337	0.213173
3.99	0.221508		3.99	0.182344			3.98	0.232938	0.194777
4	0.206766		4	0.187942			3.99	0.221508	0.182344
4.01	0.211664		4.01	0.182582			4	0.206766	0.187942
4.02	0.211165		4.02	0.20244			4.01	0.211664	0.182582
4.03	0.213457		4.03	0.192966			4.02	0.211165	0.20244
4.04	0.214984		4.04	0.193861			4.03	0.213457	0.192966
4.05	0.214439		4.05	0.182335			4.04	0.214984	0.193861
4.06	0.212085		4.06	0.18407			4.05	0.214439	0.182335
4.07	0.223721		4.07	0.193547			4.06	0.212085	0.18407
4.08	0.206376		4.08	0.186128			4.07	0.223721	0.193547
4.09	0.21323		4.09	0.188774			4.08	0.206376	0.186128
4.1	0.211495		4.1	0.188595			4.09	0.21323	0.188774
4.11	0.205279		4.11	0.181357			4.1	0.211495	0.188595
4.12	0.206803		4.12	0.179889			4.11	0.205279	0.181357
4.13	0.211039		4.13	0.169813			4.12	0.206803	0.179889
4.14	0.202101		4.14	0.165025			4.13	0.211039	0.169813
4.15	0.204515		4.15	0.167306			4.14	0.202101	0.165025
4.16	0.20951		4.16	0.16973			4.15	0.204515	0.167306
4.17	0.210351		4.17	0.177173			4.16	0.20951	0.16973
4.18	0.208037		4.18	0.175399			4.17	0.210351	0.177173
4.19	0.213542		4.19	0.172398			4.18	0.208037	0.175399
4.2	0.22583		4.2	0.182887			4.19	0.213542	0.172398
4.21	0.220678		4.21	0.1846			4.2	0.22583	0.182887
4.22	0.209356		4.22	0.174903			4.21	0.220678	0.1846
4.23	0.223558		4.23	0.180894			4.22	0.209356	0.174903
4.24	0.23032		4.24	0.17383			4.23	0.223558	0.180894
4.25	0.230312		4.25	0.163025			4.24	0.23032	0.17383
4.26	0.221338		4.26	0.165022			4.25	0.230312	0.163025
4.27	0.235849		4.27	0.179284			4.26	0.221338	0.165022
4.28	0.230167		4.28	0.185135			4.27	0.235849	0.179284
4.29	0.239675		4.29	0.17169			4.28	0.230167	0.185135
4.3	0.217969		4.3	0.184225			4.29	0.239675	0.17169
4.31	0.233003		4.31	0.18454			4.3	0.217969	0.184225
4.32	0.214824		4.32	0.178331			4.31	0.233003	0.18454
4.33	0.197323		4.33	0.192695			4.32	0.214824	0.178331
4.34	0.203373		4.34	0.189965			4.33	0.197323	0.192695
4.35	0.207581		4.35	0.190435			4.34	0.203373	0.189965
4.36	0.210269		4.36	0.186862			4.35	0.207581	0.190435
4.37	0.215276		4.37	0.181597			4.36	0.210269	0.186862
4.38	0.217796		4.38	0.188141			4.37	0.215276	0.181597
4.39	0.222934		4.39	0.191494			4.38	0.217796	0.188141
4.4	0.239858		4.4	0.19318			4.39	0.222934	0.191494
4.41	0.236417		4.41	0.194472			4.4	0.239858	0.19318
4.42	0.233754		4.42	0.185678			4.41	0.236417	0.194472
4.43	0.221519		4.43	0.201477			4.42	0.233754	0.185678
4.44	0.219898		4.44	0.185161			4.43	0.221519	0.201477
4.45	0.207089		4.45	0.175115			4.44	0.219898	0.185161
4.46	0.21226		4.46	0.182452			4.45	0.207089	0.175115
4.47	0.212328		4.47	0.182727			4.46	0.21226	0.182452
4.48	0.215821		4.48	0.187014			4.47	0.212328	0.182727
4.49	0.216157		4.49	0.191302			4.48	0.215821	0.187014
4.5	0.217887		4.5	0.183391			4.49	0.216157	0.191302
4.51	0.223581		4.51	0.182275			4.5	0.217887	0.183391
4.52	0.22625		4.52	0.183607			4.51	0.223581	0.182275
4.53	0.23927		4.53	0.192652			4.52	0.22625	0.183607
4.54	0.230936		4.54	0.185245			4.53	0.23927	0.192652
4.55	0.229456		4.55	0.184867			4.54	0.230936	0.185245
4.56	0.231818		4.56	0.187192			4.55	0.229456	0.184867
4.57	0.230778		4.57	0.18771			4.56	0.231818	0.187192
4.58	0.228057		4.58	0.178128			4.57	0.230778	0.18771
4.59	0.244435		4.59	0.176807			4.58	0.228057	0.178128
4.6	0.251437		4.6	0.184151			4.59	0.244435	0.176807
4.61	0.24704		4.61	0.180263			4.6	0.251437	0.184151
4.62	0.246716		4.62	0.18511			4.61	0.24704	0.180263
4.63	0.259045		4.63	0.185662			4.62	0.246716	0.18511
4.64	0.233834		4.64	0.189239			4.63	0.259045	0.185662
4.65	0.228086		4.65	0.184698			4.64	0.233834	0.189239
4.66	0.22399		4.66	0.185807			4.65	0.228086	0.184698
4.67	0.227759		4.67	0.182877			4.66	0.22399	0.185807
4.68	0.236335		4.68	0.184006			4.67	0.227759	0.182877
4.69	0.226837		4.69	0.179832			4.68	0.236335	0.184006
4.7	0.217432		4.7	0.192201			4.69	0.226837	0.179832
4.71	0.217709		4.71	0.192633			4.7	0.217432	0.192201
4.72	0.225528		4.72	0.193279			4.71	0.217709	0.192633
4.73	0.223956		4.73	0.187002			4.72	0.225528	0.193279
4.74	0.233304		4.74	0.18804			4.73	0.223956	0.187002
4.75	0.232917		4.75	0.181314			4.74	0.233304	0.18804
4.76	0.216374		4.76	0.188314			4.75	0.232917	0.181314
4.77	0.222634		4.77	0.191409			4.76	0.216374	0.188314
4.78	0.223348		4.78	0.199817			4.77	0.222634	0.191409
4.79	0.22209		4.79	0.182437			4.78	0.223348	0.199817
4.8	0.216576		4.8	0.196758			4.79	0.22209	0.182437
4.81	0.210758		4.81	0.194764			4.8	0.216576	0.196758
4.82	0.215793		4.82	0.180156			4.81	0.210758	0.194764
4.83	0.211776		4.83	0.182084			4.82	0.215793	0.180156
4.84	0.221177		4.84	0.177943			4.83	0.211776	0.182084
4.85	0.225784		4.85	0.178869			4.84	0.221177	0.177943
4.86	0.231873		4.86	0.178672			4.85	0.225784	0.178869
4.87	0.223269		4.87	0.176923			4.86	0.231873	0.178672
4.88	0.222247		4.88	0.180585			4.87	0.223269	0.176923
4.89	0.225169		4.89	0.182062			4.88	0.222247	0.180585
4.9	0.21137		4.9	0.182999			4.89	0.225169	0.182062
4.91	0.21789		4.91	0.185646			4.9	0.21137	0.182999
4.92	0.229283		4.92	0.180931			4.91	0.21789	0.185646
4.93	0.216214		4.93	0.18101			4.92	0.229283	0.180931
4.94	0.208137		4.94	0.189121			4.93	0.216214	0.18101
4.95	0.232833		4.95	0.18225			4.94	0.208137	0.189121
4.96	0.227136		4.96	0.188256			4.95	0.232833	0.18225
4.97	0.233174		4.97	0.183205			4.96	0.227136	0.188256
4.98	0.234797		4.98	0.177921			4.97	0.233174	0.183205
4.99	0.237425		4.99	0.191695			4.98	0.234797	0.177921
5	0.23895		5	0.173036			4.99	0.237425	0.191695
5.01	0.23265		5.01	0.180295			5	0.23895	0.173036
5.02	0.229788		5.02	0.182637			5.01	0.23265	0.180295
5.03	0.223561		5.03	0.188673			5.02	0.229788	0.182637
5.04	0.23354		5.04	0.179399			5.03	0.223561	0.188673
5.05	0.223525		5.05	0.17957			5.04	0.23354	0.179399
5.06	0.222848		5.06	0.182185			5.05	0.223525	0.17957
5.07	0.218626		5.07	0.176239			5.06	0.222848	0.182185
5.08	0.211904		5.08	0.173683			5.07	0.218626	0.176239
5.09	0.213663		5.09	0.177087			5.08	0.211904	0.173683
5.1	0.219618		5.1	0.179089			5.09	0.213663	0.177087
5.11	0.21065		5.11	0.180686			5.1	0.219618	0.179089
5.12	0.210245		5.12	0.19597			5.11	0.21065	0.180686
5.13	0.222293		5.13	0.19127			5.12	0.210245	0.19597
5.14	0.225673		5.14	0.184625			5.13	0.222293	0.19127
5.15	0.222465		5.15	0.189142			5.14	0.225673	0.184625
5.16	0.2201		5.16	0.181283			5.15	0.222465	0.189142
5.17	0.220567		5.17	0.174164			5.16	0.2201	0.181283
5.18	0.217641		5.18	0.177121			5.17	0.220567	0.174164
5.19	0.213178		5.19	0.183411			5.18	0.217641	0.177121
5.2	0.213994		5.2	0.180439			5.19	0.213178	0.183411
5.21	0.221753		5.21	0.186004			5.2	0.213994	0.180439
5.22	0.221633		5.22	0.177618			5.21	0.221753	0.186004
5.23	0.236771		5.23	0.187726			5.22	0.221633	0.177618
5.24	0.238002		5.24	0.171718			5.23	0.236771	0.187726
5.25	0.2525		5.25	0.181153			5.24	0.238002	0.171718
5.26	0.252316		5.26	0.174475			5.25	0.2525	0.181153
5.27	0.246011		5.27	0.178439			5.26	0.252316	0.174475
5.28	0.25094		5.28	0.172985			5.27	0.246011	0.178439
5.29	0.240643		5.29	0.179488			5.28	0.25094	0.172985
5.3	0.254939		5.3	0.178252			5.29	0.240643	0.179488
5.31	0.246413		5.31	0.17837			5.3	0.254939	0.178252
5.32	0.251534		5.32	0.190576			5.31	0.246413	0.17837
5.33	0.243802		5.33	0.191164			5.32	0.251534	0.190576
5.34	0.253673		5.34	0.191325			5.33	0.243802	0.191164
5.35	0.24669		5.35	0.184886			5.34	0.253673	0.191325
5.36	0.247475		5.36	0.182104			5.35	0.24669	0.184886
5.37	0.245747		5.37	0.189146			5.36	0.247475	0.182104
5.38	0.238901		5.38	0.187574			5.37	0.245747	0.189146
5.39	0.231017		5.39	0.19018			5.38	0.238901	0.187574
5.4	0.237614		5.4	0.184159			5.39	0.231017	0.19018
5.41	0.242312		5.41	0.177635			5.4	0.237614	0.184159
5.42	0.238778		5.42	0.172098			5.41	0.242312	0.177635
5.43	0.250444		5.43	0.178766			5.42	0.238778	0.172098
5.44	0.252822		5.44	0.189627			5.43	0.250444	0.178766
5.45	0.250024		5.45	0.183695			5.44	0.252822	0.189627
5.46	0.262304		5.46	0.173235			5.45	0.250024	0.183695
5.47	0.25555		5.47	0.17651			5.46	0.262304	0.173235
5.48	0.254227		5.48	0.186492			5.47	0.25555	0.17651
5.49	0.258152		5.49	0.195343			5.48	0.254227	0.186492
5.5	0.266328		5.5	0.188721			5.49	0.258152	0.195343
5.51	0.263702		5.51	0.180647			5.5	0.266328	0.188721
5.52	0.267785		5.52	0.181728			5.51	0.263702	0.180647
5.53	0.269505		5.53	0.194724			5.52	0.267785	0.181728
5.54	0.250763		5.54	0.190615			5.53	0.269505	0.194724
5.55	0.241059		5.55	0.180067			5.54	0.250763	0.190615
5.56	0.247715		5.56	0.188845			5.55	0.241059	0.180067
5.57	0.244731		5.57	0.192915			5.56	0.247715	0.188845
5.58	0.254785		5.58	0.179976			5.57	0.244731	0.192915
5.59	0.258657		5.59	0.172043			5.58	0.254785	0.179976
5.6	0.257007		5.6	0.17629			5.59	0.258657	0.172043
5.61	0.246008		5.61	0.176123			5.6	0.257007	0.17629
5.62	0.235443		5.62	0.182675			5.61	0.246008	0.176123
5.63	0.242355		5.63	0.193187			5.62	0.235443	0.182675
5.64	0.238247		5.64	0.182252			5.63	0.242355	0.193187
5.65	0.228748		5.65	0.19203			5.64	0.238247	0.182252
5.66	0.215288		5.66	0.194958			5.65	0.228748	0.19203
5.67	0.215538		5.67	0.176679			5.66	0.215288	0.194958
5.68	0.210866		5.68	0.178711			5.67	0.215538	0.176679
5.69	0.218042		5.69	0.181756			5.68	0.210866	0.178711
5.7	0.223977		5.7	0.172677			5.69	0.218042	0.181756
5.71	0.2171		5.71	0.166651			5.7	0.223977	0.172677
5.72	0.232742		5.72	0.168758			5.71	0.2171	0.166651
5.73	0.226851		5.73	0.169195			5.72	0.232742	0.168758
5.74	0.223078		5.74	0.176929			5.73	0.226851	0.169195
5.75	0.224507		5.75	0.175982			5.74	0.223078	0.176929
5.76	0.208343		5.76	0.184983			5.75	0.224507	0.175982
5.77	0.206954		5.77	0.185814			5.76	0.208343	0.184983
5.78	0.204755		5.78	0.193687			5.77	0.206954	0.185814
5.79	0.202743		5.79	0.188581			5.78	0.204755	0.193687
5.8	0.206323		5.8	0.184558			5.79	0.202743	0.188581
5.81	0.196492		5.81	0.187413			5.8	0.206323	0.184558
5.82	0.20743		5.82	0.1755			5.81	0.196492	0.187413
5.83	0.206428		5.83	0.182138			5.82	0.20743	0.1755
5.84	0.210159		5.84	0.191891			5.83	0.206428	0.182138
5.85	0.214896		5.85	0.185089			5.84	0.210159	0.191891
5.86	0.207667		5.86	0.189653			5.85	0.214896	0.185089
5.87	0.216704		5.87	0.183754			5.86	0.207667	0.189653
5.88	0.207666		5.88	0.191822			5.87	0.216704	0.183754
5.89	0.209817		5.89	0.184043			5.88	0.207666	0.191822
5.9	0.211182		5.9	0.178539			5.89	0.209817	0.184043
5.91	0.208836		5.91	0.176973			5.9	0.211182	0.178539
5.92	0.212216		5.92	0.177601			5.91	0.208836	0.176973
5.93	0.218342		5.93	0.187497			5.92	0.212216	0.177601
5.94	0.218526		5.94	0.185963			5.93	0.218342	0.187497
5.95	0.213528		5.95	0.185248			5.94	0.218526	0.185963
5.96	0.229858		5.96	0.183867			5.95	0.213528	0.185248
5.97	0.245062		5.97	0.187495			5.96	0.229858	0.183867
5.98	0.251638		5.98	0.178335			5.97	0.245062	0.187495
5.99	0.254547		5.99	0.179425			5.98	0.251638	0.178335
6	0.254026		6	0.183298			5.99	0.254547	0.179425
6.01	0.239302		6.01	0.189837			6	0.254026	0.183298
6.02	0.241784		6.02	0.198573			6.01	0.239302	0.189837
6.03	0.239048		6.03	0.181587			6.02	0.241784	0.198573
6.04	0.242041		6.04	0.171749			6.03	0.239048	0.181587
6.05	0.231208		6.05	0.178127			6.04	0.242041	0.171749
6.06	0.237883		6.06	0.182082			6.05	0.231208	0.178127
6.07	0.244886		6.07	0.181857			6.06	0.237883	0.182082
6.08	0.240876		6.08	0.172636			6.07	0.244886	0.181857
6.09	0.230624		6.09	0.17225			6.08	0.240876	0.172636
6.1	0.238895		6.1	0.188131			6.09	0.230624	0.17225
6.11	0.233472		6.11	0.177747			6.1	0.238895	0.188131
6.12	0.234803		6.12	0.177002			6.11	0.233472	0.177747
6.13	0.228072		6.13	0.172424			6.12	0.234803	0.177002
6.14	0.227319		6.14	0.172604			6.13	0.228072	0.172424
6.15	0.229732		6.15	0.183119			6.14	0.227319	0.172604
6.16	0.234859		6.16	0.176719			6.15	0.229732	0.183119
6.17	0.24705		6.17	0.169555			6.16	0.234859	0.176719
6.18	0.245495		6.18	0.165147			6.17	0.24705	0.169555
6.19	0.244446		6.19	0.171655			6.18	0.245495	0.165147
6.2	0.234771		6.2	0.166521			6.19	0.244446	0.171655
6.21	0.236851		6.21	0.165578			6.2	0.234771	0.166521
6.22	0.240467		6.22	0.167091			6.21	0.236851	0.165578
6.23	0.234961		6.23	0.182085			6.22	0.240467	0.167091
6.24	0.251596		6.24	0.188621			6.23	0.234961	0.182085
6.25	0.237192		6.25	0.195841			6.24	0.251596	0.188621
6.26	0.251522		6.26	0.189801			6.25	0.237192	0.195841
6.27	0.244892		6.27	0.190544			6.26	0.251522	0.189801
6.28	0.242561		6.28	0.19348			6.27	0.244892	0.190544
6.29	0.239218		6.29	0.203243			6.28	0.242561	0.19348
6.3	0.248675		6.3	0.194905			6.29	0.239218	0.203243
6.31	0.247422		6.31	0.186188			6.3	0.248675	0.194905
6.32	0.246357		6.32	0.183707			6.31	0.247422	0.186188
6.33	0.25397		6.33	0.18931			6.32	0.246357	0.183707
6.34	0.265725		6.34	0.190016			6.33	0.25397	0.18931
6.35	0.254864		6.35	0.196306			6.34	0.265725	0.190016
6.36	0.257984		6.36	0.188253			6.35	0.254864	0.196306
6.37	0.256732		6.37	0.196365			6.36	0.257984	0.188253
6.38	0.258653		6.38	0.186832			6.37	0.256732	0.196365
6.39	0.254014		6.39	0.184799			6.38	0.258653	0.186832
6.4	0.244955		6.4	0.186697			6.39	0.254014	0.184799
6.41	0.252117		6.41	0.187028			6.4	0.244955	0.186697
6.42	0.266948		6.42	0.187469			6.41	0.252117	0.187028
6.43	0.282646		6.43	0.193193			6.42	0.266948	0.187469
6.44	0.263882		6.44	0.190857			6.43	0.282646	0.193193
6.45	0.260548		6.45	0.190973			6.44	0.263882	0.190857
6.46	0.253941		6.46	0.185832			6.45	0.260548	0.190973
6.47	0.273122		6.47	0.186649			6.46	0.253941	0.185832
6.48	0.271808		6.48	0.195328			6.47	0.273122	0.186649
6.49	0.276724		6.49	0.180053			6.48	0.271808	0.195328
6.5	0.27202		6.5	0.1884			6.49	0.276724	0.180053
6.51	0.274717		6.51	0.177865			6.5	0.27202	0.1884
6.52	0.272579		6.52	0.183757			6.51	0.274717	0.177865
6.53	0.253986		6.53	0.176717			6.52	0.272579	0.183757
6.54	0.253602		6.54	0.180677			6.53	0.253986	0.176717
6.55	0.249731		6.55	0.171719			6.54	0.253602	0.180677
6.56	0.233403		6.56	0.171546			6.55	0.249731	0.171719
6.57	0.23443		6.57	0.181022			6.56	0.233403	0.171546
6.58	0.233939		6.58	0.181607			6.57	0.23443	0.181022
6.59	0.254152		6.59	0.18581			6.58	0.233939	0.181607
6.6	0.248826		6.6	0.179103			6.59	0.254152	0.18581
6.61	0.26178		6.61	0.179785			6.6	0.248826	0.179103
6.62	0.25647		6.62	0.175212			6.61	0.26178	0.179785
6.63	0.247113		6.63	0.177038			6.62	0.25647	0.175212
6.64	0.253523		6.64	0.177727			6.63	0.247113	0.177038
6.65	0.255616		6.65	0.177404			6.64	0.253523	0.177727
6.66	0.254177		6.66	0.173842			6.65	0.255616	0.177404
6.67	0.256705		6.67	0.17169			6.66	0.254177	0.173842
6.68	0.275499		6.68	0.172321			6.67	0.256705	0.17169
6.69	0.272225		6.69	0.182291			6.68	0.275499	0.172321
6.7	0.274282		6.7	0.183905			6.69	0.272225	0.182291
6.71	0.263995		6.71	0.189557			6.7	0.274282	0.183905
6.72	0.256047		6.72	0.18528			6.71	0.263995	0.189557
6.73	0.247605		6.73	0.185245			6.72	0.256047	0.18528
6.74	0.242386		6.74	0.179536			6.73	0.247605	0.185245
6.75	0.23964		6.75	0.183			6.74	0.242386	0.179536
6.76	0.251971		6.76	0.192367			6.75	0.23964	0.183
6.77	0.23257		6.77	0.184455			6.76	0.251971	0.192367
6.78	0.246735		6.78	0.182179			6.77	0.23257	0.184455
6.79	0.23449		6.79	0.187688			6.78	0.246735	0.182179
6.8	0.224942		6.8	0.185293			6.79	0.23449	0.187688
6.81	0.228083		6.81	0.183426			6.8	0.224942	0.185293
6.82	0.220262		6.82	0.182311			6.81	0.228083	0.183426
6.83	0.22683		6.83	0.177726			6.82	0.220262	0.182311
6.84	0.224681		6.84	0.16784			6.83	0.22683	0.177726
6.85	0.220399		6.85	0.173434			6.84	0.224681	0.16784
6.86	0.224954		6.86	0.178204			6.85	0.220399	0.173434
6.87	0.234134		6.87	0.17057			6.86	0.224954	0.178204
6.88	0.232151		6.88	0.169414			6.87	0.234134	0.17057
6.89	0.231552		6.89	0.170018			6.88	0.232151	0.169414
6.9	0.227998		6.9	0.168188			6.89	0.231552	0.170018
6.91	0.228111		6.91	0.171744			6.9	0.227998	0.168188
6.92	0.221902		6.92	0.172893			6.91	0.228111	0.171744
6.93	0.216499		6.93	0.180456			6.92	0.221902	0.172893
6.94	0.208925		6.94	0.168916			6.93	0.216499	0.180456
6.95	0.215663		6.95	0.172643			6.94	0.208925	0.168916
6.96	0.22376		6.96	0.178639			6.95	0.215663	0.172643
6.97	0.225284		6.97	0.176196			6.96	0.22376	0.178639
6.98	0.228838		6.98	0.17647			6.97	0.225284	0.176196
6.99	0.224874		6.99	0.175908			6.98	0.228838	0.17647
7	0.214719		7	0.178489			6.99	0.224874	0.175908
7.01	0.226263		7.01	0.17878			7	0.214719	0.178489
7.02	0.230283		7.02	0.183225			7.01	0.226263	0.17878
7.03	0.222614		7.03	0.171154			7.02	0.230283	0.183225
7.04	0.213191		7.04	0.167297			7.03	0.222614	0.171154
7.05	0.224356		7.05	0.179463			7.04	0.213191	0.167297
7.06	0.235744		7.06	0.167298			7.05	0.224356	0.179463
7.07	0.236309		7.07	0.17292			7.06	0.235744	0.167298
7.08	0.238126		7.08	0.172156			7.07	0.236309	0.17292
7.09	0.236465		7.09	0.1728			7.08	0.238126	0.172156
7.1	0.229472		7.1	0.180185			7.09	0.236465	0.1728
7.11	0.218346		7.11	0.183685			7.1	0.229472	0.180185
7.12	0.210967		7.12	0.177539			7.11	0.218346	0.183685
7.13	0.212871		7.13	0.176806			7.12	0.210967	0.177539
7.14	0.221831		7.14	0.174606			7.13	0.212871	0.176806
7.15	0.224156		7.15	0.171301			7.14	0.221831	0.174606
7.16	0.234319		7.16	0.168285			7.15	0.224156	0.171301
7.17	0.228441		7.17	0.168404			7.16	0.234319	0.168285
7.18	0.21393		7.18	0.167455			7.17	0.228441	0.168404
7.19	0.223245		7.19	0.167169			7.18	0.21393	0.167455
7.2	0.210956		7.2	0.178351			7.19	0.223245	0.167169
7.21	0.212213		7.21	0.179726			7.2	0.210956	0.178351
7.22	0.211301		7.22	0.173705			7.21	0.212213	0.179726
7.23	0.212961		7.23	0.16692			7.22	0.211301	0.173705
7.24	0.216558		7.24	0.173226			7.23	0.212961	0.16692
7.25	0.211744		7.25	0.170239			7.24	0.216558	0.173226
7.26	0.220027		7.26	0.170028			7.25	0.211744	0.170239
7.27	0.22663		7.27	0.168411			7.26	0.220027	0.170028
7.28	0.212147		7.28	0.172959			7.27	0.22663	0.168411
7.29	0.20991		7.29	0.171616			7.28	0.212147	0.172959
7.3	0.205163		7.3	0.176457			7.29	0.20991	0.171616
7.31	0.19612		7.31	0.17535			7.3	0.205163	0.176457
7.32	0.205941		7.32	0.172189			7.31	0.19612	0.17535
7.33	0.217087		7.33	0.164011			7.32	0.205941	0.172189
7.34	0.221516		7.34	0.171312			7.33	0.217087	0.164011
7.35	0.225443		7.35	0.173877			7.34	0.221516	0.171312
7.36	0.218033		7.36	0.1752			7.35	0.225443	0.173877
7.37	0.203006		7.37	0.172897			7.36	0.218033	0.1752
7.38	0.215485		7.38	0.172866			7.37	0.203006	0.172897
7.39	0.221114		7.39	0.176491			7.38	0.215485	0.172866
7.4	0.227184		7.4	0.168027			7.39	0.221114	0.176491
7.41	0.219765		7.41	0.183247			7.4	0.227184	0.168027
7.42	0.217077		7.42	0.18039			7.41	0.219765	0.183247
7.43	0.211765		7.43	0.180703			7.42	0.217077	0.18039
7.44	0.194989		7.44	0.178331			7.43	0.211765	0.180703
7.45	0.197515		7.45	0.181334			7.44	0.194989	0.178331
7.46	0.205406		7.46	0.18806			7.45	0.197515	0.181334
7.47	0.20297		7.47	0.186808			7.46	0.205406	0.18806
7.48	0.203136		7.48	0.174642			7.47	0.20297	0.186808
7.49	0.187042		7.49	0.174239			7.48	0.203136	0.174642
7.5	0.196215		7.5	0.168682			7.49	0.187042	0.174239
7.51	0.19817		7.51	0.162509			7.5	0.196215	0.168682
7.52	0.204621		7.52	0.163783			7.51	0.19817	0.162509
7.53	0.191147		7.53	0.168451			7.52	0.204621	0.163783
7.54	0.189951		7.54	0.169075			7.53	0.191147	0.168451
7.55	0.196637		7.55	0.157498			7.54	0.189951	0.169075
7.56	0.217548		7.56	0.161151			7.55	0.196637	0.157498
7.57	0.207567		7.57	0.159602			7.56	0.217548	0.161151
7.58	0.206519		7.58	0.16629			7.57	0.207567	0.159602
7.59	0.207705		7.59	0.169983			7.58	0.206519	0.16629
7.6	0.197264		7.6	0.165098			7.59	0.207705	0.169983
7.61	0.201207		7.61	0.167091			7.6	0.197264	0.165098
7.62	0.202069		7.62	0.167093			7.61	0.201207	0.167091
7.63	0.201901		7.63	0.166443			7.62	0.202069	0.167093
7.64	0.197282		7.64	0.162444			7.63	0.201901	0.166443
7.65	0.203521		7.65	0.162376			7.64	0.197282	0.162444
7.66	0.195393		7.66	0.160149			7.65	0.203521	0.162376
7.67	0.199391		7.67	0.167368			7.66	0.195393	0.160149
7.68	0.202005		7.68	0.160987			7.67	0.199391	0.167368
7.69	0.205745		7.69	0.159827			7.68	0.202005	0.160987
7.7	0.214755		7.7	0.163956			7.69	0.205745	0.159827
7.71	0.203121		7.71	0.170525			7.7	0.214755	0.163956
7.72	0.204823		7.72	0.172844			7.71	0.203121	0.170525
7.73	0.208301		7.73	0.166873			7.72	0.204823	0.172844
7.74	0.203723		7.74	0.16459			7.73	0.208301	0.166873
7.75	0.203591		7.75	0.174703			7.74	0.203723	0.16459
7.76	0.207608		7.76	0.175258			7.75	0.203591	0.174703
7.77	0.2108		7.77	0.17742			7.76	0.207608	0.175258
7.78	0.202021		7.78	0.183737			7.77	0.2108	0.17742
7.79	0.200241		7.79	0.192749			7.78	0.202021	0.183737
7.8	0.207676		7.8	0.179215			7.79	0.200241	0.192749
7.81	0.213649		7.81	0.169719			7.8	0.207676	0.179215
7.82	0.214803		7.82	0.176252			7.81	0.213649	0.169719
7.83	0.217229		7.83	0.180325			7.82	0.214803	0.176252
7.84	0.218753		7.84	0.186373			7.83	0.217229	0.180325
7.85	0.222918		7.85	0.183921			7.84	0.218753	0.186373
7.86	0.219088		7.86	0.174735			7.85	0.222918	0.183921
7.87	0.213198		7.87	0.174463			7.86	0.219088	0.174735
7.88	0.219871		7.88	0.186943			7.87	0.213198	0.174463
7.89	0.225152		7.89	0.183967			7.88	0.219871	0.186943
7.9	0.22872		7.9	0.186829			7.89	0.225152	0.183967
7.91	0.224601		7.91	0.173286			7.9	0.22872	0.186829
7.92	0.226311		7.92	0.191842			7.91	0.224601	0.173286
7.93	0.21839		7.93	0.201287			7.92	0.226311	0.191842
7.94	0.22016		7.94	0.191108			7.93	0.21839	0.201287
7.95	0.222815		7.95	0.178832			7.94	0.22016	0.191108
7.96	0.215546		7.96	0.171928			7.95	0.222815	0.178832
7.97	0.219714		7.97	0.177317			7.96	0.215546	0.171928
7.98	0.226507		7.98	0.181486			7.97	0.219714	0.177317
7.99	0.222127		7.99	0.180636			7.98	0.226507	0.181486
8	0.216189		8	0.188325			7.99	0.222127	0.180636
8.01	0.218589		8.01	0.19577			8	0.216189	0.188325
8.02	0.219595		8.02	0.191974			8.01	0.218589	0.19577
8.03	0.218051		8.03	0.184973			8.02	0.219595	0.191974
8.04	0.215843		8.04	0.181634			8.03	0.218051	0.184973
8.05	0.207883		8.05	0.190821			8.04	0.215843	0.181634
8.06	0.207132		8.06	0.185444			8.05	0.207883	0.190821
8.07	0.199087		8.07	0.189411			8.06	0.207132	0.185444
8.08	0.206501		8.08	0.196008			8.07	0.199087	0.189411
8.09	0.209552		8.09	0.180886			8.08	0.206501	0.196008
8.1	0.21164		8.1	0.183323			8.09	0.209552	0.180886
8.11	0.216944		8.11	0.184341			8.1	0.21164	0.183323
8.12	0.219125		8.12	0.190182			8.11	0.216944	0.184341
8.13	0.222975		8.13	0.191178			8.12	0.219125	0.190182
8.14	0.22636		8.14	0.193087			8.13	0.222975	0.191178
8.15	0.223562		8.15	0.196162			8.14	0.22636	0.193087
8.16	0.223297		8.16	0.187333			8.15	0.223562	0.196162
8.17	0.219302		8.17	0.181803			8.16	0.223297	0.187333
8.18	0.215272		8.18	0.188768			8.17	0.219302	0.181803
8.19	0.215621		8.19	0.18871			8.18	0.215272	0.188768
8.2	0.214753		8.2	0.179882			8.19	0.215621	0.18871
8.21	0.211055		8.21	0.178212			8.2	0.214753	0.179882
8.22	0.206927		8.22	0.162753			8.21	0.211055	0.178212
8.23	0.207662		8.23	0.166391			8.22	0.206927	0.162753
8.24	0.207095		8.24	0.175751			8.23	0.207662	0.166391
8.25	0.209569		8.25	0.169952			8.24	0.207095	0.175751
8.26	0.21296		8.26	0.174903			8.25	0.209569	0.169952
8.27	0.211874		8.27	0.168297			8.26	0.21296	0.174903
8.28	0.214593		8.28	0.165267			8.27	0.211874	0.168297
8.29	0.214306		8.29	0.167529			8.28	0.214593	0.165267
8.3	0.211023		8.3	0.168163			8.29	0.214306	0.167529
8.31	0.209222		8.31	0.166974			8.3	0.211023	0.168163
8.32	0.201574		8.32	0.16761			8.31	0.209222	0.166974
8.33	0.18985		8.33	0.164335			8.32	0.201574	0.16761
8.34	0.192109		8.34	0.172661			8.33	0.18985	0.164335
8.35	0.208908		8.35	0.166642			8.34	0.192109	0.172661
8.36	0.220653		8.36	0.165177			8.35	0.208908	0.166642
8.37	0.213215		8.37	0.167504			8.36	0.220653	0.165177
8.38	0.211159		8.38	0.159808			8.37	0.213215	0.167504
8.39	0.205537		8.39	0.154458			8.38	0.211159	0.159808
8.4	0.211123		8.4	0.150818			8.39	0.205537	0.154458
8.41	0.205686		8.41	0.164923			8.4	0.211123	0.150818
8.42	0.213797		8.42	0.159196			8.41	0.205686	0.164923
8.43	0.204455		8.43	0.158726			8.42	0.213797	0.159196
8.44	0.206137		8.44	0.16654			8.43	0.204455	0.158726
8.45	0.206368		8.45	0.167165			8.44	0.206137	0.16654
8.46	0.218328		8.46	0.169029			8.45	0.206368	0.167165
8.47	0.205956		8.47	0.164528			8.46	0.218328	0.169029
8.48	0.203809		8.48	0.168894			8.47	0.205956	0.164528
8.49	0.196286		8.49	0.165298			8.48	0.203809	0.168894
8.5	0.19515		8.5	0.168081			8.49	0.196286	0.165298
8.51	0.199698		8.51	0.16561			8.5	0.19515	0.168081
8.52	0.203074		8.52	0.165454			8.51	0.199698	0.16561
8.53	0.208866		8.53	0.17103			8.52	0.203074	0.165454
8.54	0.19868		8.54	0.170131			8.53	0.208866	0.17103
8.55	0.185914		8.55	0.167189			8.54	0.19868	0.170131
8.56	0.1963		8.56	0.176891			8.55	0.185914	0.167189
8.57	0.199408		8.57	0.164405			8.56	0.1963	0.176891
8.58	0.198144		8.58	0.166577			8.57	0.199408	0.164405
8.59	0.195156		8.59	0.166097			8.58	0.198144	0.166577
8.6	0.205198		8.6	0.169955			8.59	0.195156	0.166097
8.61	0.204834		8.61	0.175693			8.6	0.205198	0.169955
8.62	0.204083		8.62	0.16814			8.61	0.204834	0.175693
8.63	0.195367		8.63	0.162468			8.62	0.204083	0.16814
8.64	0.199977		8.64	0.154231			8.63	0.195367	0.162468
8.65	0.186788		8.65	0.154268			8.64	0.199977	0.154231
8.66	0.190711		8.66	0.15432			8.65	0.186788	0.154268
8.67	0.196571		8.67	0.161766			8.66	0.190711	0.15432
8.68	0.193195		8.68	0.167399			8.67	0.196571	0.161766
8.69	0.184347		8.69	0.169442			8.68	0.193195	0.167399
8.7	0.189912		8.7	0.16608			8.69	0.184347	0.169442
8.71	0.18247		8.71	0.173548			8.7	0.189912	0.16608
8.72	0.183006		8.72	0.178066			8.71	0.18247	0.173548
8.73	0.20124		8.73	0.173209			8.72	0.183006	0.178066
8.74	0.192948		8.74	0.179947			8.73	0.20124	0.173209
8.75	0.203597		8.75	0.170577			8.74	0.192948	0.179947
8.76	0.205244		8.76	0.174933			8.75	0.203597	0.170577
8.77	0.222134		8.77	0.166421			8.76	0.205244	0.174933
8.78	0.219445		8.78	0.163452			8.77	0.222134	0.166421
8.79	0.209635		8.79	0.161112			8.78	0.219445	0.163452
8.8	0.214842		8.8	0.167774			8.79	0.209635	0.161112
8.81	0.203084		8.81	0.164435			8.8	0.214842	0.167774
8.82	0.210356		8.82	0.162915			8.81	0.203084	0.164435
8.83	0.208938		8.83	0.160438			8.82	0.210356	0.162915
8.84	0.21735		8.84	0.160708			8.83	0.208938	0.160438
8.85	0.216223		8.85	0.166237			8.84	0.21735	0.160708
8.86	0.212984		8.86	0.166992			8.85	0.216223	0.166237
8.87	0.202099		8.87	0.167142			8.86	0.212984	0.166992
8.88	0.208905		8.88	0.172693			8.87	0.202099	0.167142
8.89	0.203242		8.89	0.171703			8.88	0.208905	0.172693
8.9	0.210929		8.9	0.168928			8.89	0.203242	0.171703
8.91	0.206811		8.91	0.165582			8.9	0.210929	0.168928
8.92	0.205395		8.92	0.16112			8.91	0.206811	0.165582
8.93	0.209479		8.93	0.158808			8.92	0.205395	0.16112
8.94	0.213837		8.94	0.159589			8.93	0.209479	0.158808
8.95	0.210703		8.95	0.160674			8.94	0.213837	0.159589
8.96	0.216781		8.96	0.158129			8.95	0.210703	0.160674
8.97	0.213902		8.97	0.155631			8.96	0.216781	0.158129
8.98	0.207513		8.98	0.158968			8.97	0.213902	0.155631
8.99	0.197018		8.99	0.16141			8.98	0.207513	0.158968
9	0.208486		9	0.162544			8.99	0.197018	0.16141
9.01	0.203789		9.01	0.161733			9	0.208486	0.162544
9.02	0.215138		9.02	0.157907			9.01	0.203789	0.161733
9.03	0.201588		9.03	0.151056			9.02	0.215138	0.157907
9.04	0.197869		9.04	0.147813			9.03	0.201588	0.151056
9.05	0.209899		9.05	0.148629			9.04	0.197869	0.147813
9.06	0.197278		9.06	0.151214			9.05	0.209899	0.148629
9.07	0.202126		9.07	0.155767			9.06	0.197278	0.151214
9.08	0.192298		9.08	0.156834			9.07	0.202126	0.155767
9.09	0.193198		9.09	0.155472			9.08	0.192298	0.156834
9.1	0.197541		9.1	0.160932			9.09	0.193198	0.155472
9.11	0.194224		9.11	0.163905			9.1	0.197541	0.160932
9.12	0.189646		9.12	0.157506			9.11	0.194224	0.163905
9.13	0.190224		9.13	0.161444			9.12	0.189646	0.157506
9.14	0.18689		9.14	0.156674			9.13	0.190224	0.161444
9.15	0.180393		9.15	0.163809			9.14	0.18689	0.156674
9.16	0.18737		9.16	0.148894			9.15	0.180393	0.163809
9.17	0.185471		9.17	0.155926			9.16	0.18737	0.148894
9.18	0.189161		9.18	0.158421			9.17	0.185471	0.155926
9.19	0.192918		9.19	0.16853			9.18	0.189161	0.158421
9.2	0.19497		9.2	0.172179			9.19	0.192918	0.16853
9.21	0.202886		9.21	0.163197			9.2	0.19497	0.172179
9.22	0.204347		9.22	0.176174			9.21	0.202886	0.163197
9.23	0.204174		9.23	0.168516			9.22	0.204347	0.176174
9.24	0.205452		9.24	0.153889			9.23	0.204174	0.168516
9.25	0.216011		9.25	0.153363			9.24	0.205452	0.153889
9.26	0.213939		9.26	0.160144			9.25	0.216011	0.153363
9.27	0.213719		9.27	0.162517			9.26	0.213939	0.160144
9.28	0.214466		9.28	0.157511			9.27	0.213719	0.162517
9.29	0.222363		9.29	0.164488			9.28	0.214466	0.157511
9.3	0.211492		9.3	0.162361			9.29	0.222363	0.164488
9.31	0.217037		9.31	0.156858			9.3	0.211492	0.162361
9.32	0.226024		9.32	0.153133			9.31	0.217037	0.156858
9.33	0.234122		9.33	0.160782			9.32	0.226024	0.153133
9.34	0.227754		9.34	0.164551			9.33	0.234122	0.160782
9.35	0.224976		9.35	0.158983			9.34	0.227754	0.164551
9.36	0.228177		9.36	0.158728			9.35	0.224976	0.158983
9.37	0.236076		9.37	0.162186			9.36	0.228177	0.158728
9.38	0.237736		9.38	0.159275			9.37	0.236076	0.162186
9.39	0.240938		9.39	0.155502			9.38	0.237736	0.159275
9.4	0.256084		9.4	0.153003			9.39	0.240938	0.155502
9.41	0.253491		9.41	0.15156			9.4	0.256084	0.153003
9.42	0.231043		9.42	0.157681			9.41	0.253491	0.15156
9.43	0.22696		9.43	0.157424			9.42	0.231043	0.157681
9.44	0.212345		9.44	0.152837			9.43	0.22696	0.157424
9.45	0.222898		9.45	0.162587			9.44	0.212345	0.152837
9.46	0.217421		9.46	0.164019			9.45	0.222898	0.162587
9.47	0.22195		9.47	0.167318			9.46	0.217421	0.164019
9.48	0.217054		9.48	0.163716			9.47	0.22195	0.167318
9.49	0.224062		9.49	0.171646			9.48	0.217054	0.163716
9.5	0.217555		9.5	0.170383			9.49	0.224062	0.171646
9.51	0.219167		9.51	0.166004			9.5	0.217555	0.170383
9.52	0.227453		9.52	0.163755			9.51	0.219167	0.166004
9.53	0.234372		9.53	0.162362			9.52	0.227453	0.163755
9.54	0.223398		9.54	0.166738			9.53	0.234372	0.162362
9.55	0.226758		9.55	0.169593			9.54	0.223398	0.166738
9.56	0.228212		9.56	0.163278			9.55	0.226758	0.169593
9.57	0.237656		9.57	0.158923			9.56	0.228212	0.163278
9.58	0.225641		9.58	0.152146			9.57	0.237656	0.158923
9.59	0.218427		9.59	0.15302			9.58	0.225641	0.152146
9.6	0.222086		9.6	0.15932			9.59	0.218427	0.15302
9.61	0.224244		9.61	0.161638			9.6	0.222086	0.15932
9.62	0.237557		9.62	0.159474			9.61	0.224244	0.161638
9.63	0.230807		9.63	0.158369			9.62	0.237557	0.159474
9.64	0.230007		9.64	0.159354			9.63	0.230807	0.158369
9.65	0.226585		9.65	0.154906			9.64	0.230007	0.159354
9.66	0.22456		9.66	0.158196			9.65	0.226585	0.154906
9.67	0.229567		9.67	0.15248			9.66	0.22456	0.158196
9.68	0.227339		9.68	0.155544			9.67	0.229567	0.15248
9.69	0.227333		9.69	0.152369			9.68	0.227339	0.155544
9.7	0.225026		9.7	0.158192			9.69	0.227333	0.152369
9.71	0.225113		9.71	0.16078			9.7	0.225026	0.158192
9.72	0.223284		9.72	0.167325			9.71	0.225113	0.16078
9.73	0.221773		9.73	0.178522			9.72	0.223284	0.167325
9.74	0.218479		9.74	0.171951			9.73	0.221773	0.178522
9.75	0.228145		9.75	0.170775			9.74	0.218479	0.171951
9.76	0.236454		9.76	0.16502			9.75	0.228145	0.170775
9.77	0.257315		9.77	0.163196			9.76	0.236454	0.16502
9.78	0.263296		9.78	0.171366			9.77	0.257315	0.163196
9.79	0.25337		9.79	0.170918			9.78	0.263296	0.171366
9.8	0.244939		9.8	0.166713			9.79	0.25337	0.170918
9.81	0.250541		9.81	0.172201			9.8	0.244939	0.166713
9.82	0.249127		9.82	0.169793			9.81	0.250541	0.172201
9.83	0.239877		9.83	0.167369			9.82	0.249127	0.169793
9.84	0.238397		9.84	0.174621			9.83	0.239877	0.167369
9.85	0.236697		9.85	0.166465			9.84	0.238397	0.174621
9.86	0.221975		9.86	0.159537			9.85	0.236697	0.166465
9.87	0.233685		9.87	0.174632			9.86	0.221975	0.159537
9.88	0.241112		9.88	0.166763			9.87	0.233685	0.174632
9.89	0.234554		9.89	0.170587			9.88	0.241112	0.166763
9.9	0.230583		9.9	0.167203			9.89	0.234554	0.170587
9.91	0.232893		9.91	0.163327			9.9	0.230583	0.167203
9.92	0.251096		9.92	0.163677			9.91	0.232893	0.163327
9.93	0.236597		9.93	0.16321			9.92	0.251096	0.163677
9.94	0.220772		9.94	0.163857			9.93	0.236597	0.16321
9.95	0.228905		9.95	0.180921			9.94	0.220772	0.163857
9.96	0.222228		9.96	0.176127			9.95	0.228905	0.180921
9.97	0.210708		9.97	0.167919			9.96	0.222228	0.176127
9.98	0.214878		9.98	0.168221			9.97	0.210708	0.167919
9.99	0.204511		9.99	0.166011			9.98	0.214878	0.168221
10	0.202031		10	0.163009			9.99	0.204511	0.166011
10.01	0.215515		10.01	0.166908			10	0.202031	0.163009
10.02	0.220331		10.02	0.157681			10.01	0.215515	0.166908
10.03	0.209424		10.03	0.15064			10.02	0.220331	0.157681
10.04	0.20926		10.04	0.150733			10.03	0.209424	0.15064
10.05	0.214956		10.05	0.158726			10.04	0.20926	0.150733
10.06	0.207351		10.06	0.15771			10.05	0.214956	0.158726
10.07	0.203574		10.07	0.160945			10.06	0.207351	0.15771
10.08	0.19771		10.08	0.168612			10.07	0.203574	0.160945
10.09	0.208473		10.09	0.16626			10.08	0.19771	0.168612
10.1	0.212606		10.1	0.181373			10.09	0.208473	0.16626
10.11	0.20986		10.11	0.181818			10.1	0.212606	0.181373
10.12	0.209274		10.12	0.175397			10.11	0.20986	0.181818
10.13	0.205034		10.13	0.176079			10.12	0.209274	0.175397
10.14	0.207553		10.14	0.173345			10.13	0.205034	0.176079
10.15	0.204422		10.15	0.172915			10.14	0.207553	0.173345
10.16	0.207632		10.16	0.169588			10.15	0.204422	0.172915
10.17	0.19981		10.17	0.159707			10.16	0.207632	0.169588
10.18	0.197239		10.18	0.166669			10.17	0.19981	0.159707
10.19	0.202984		10.19	0.15691			10.18	0.197239	0.166669
10.2	0.196756		10.2	0.161434			10.19	0.202984	0.15691
10.21	0.201124		10.21	0.153911			10.2	0.196756	0.161434
10.22	0.211342		10.22	0.153584			10.21	0.201124	0.153911
10.23	0.213087		10.23	0.156408			10.22	0.211342	0.153584
10.24	0.209527		10.24	0.163713			10.23	0.213087	0.156408
10.25	0.213339		10.25	0.172525			10.24	0.209527	0.163713
10.26	0.220297		10.26	0.168884			10.25	0.213339	0.172525
10.27	0.209585		10.27	0.172221			10.26	0.220297	0.168884
10.28	0.211143		10.28	0.173253			10.27	0.209585	0.172221
10.29	0.212979		10.29	0.183121			10.28	0.211143	0.173253
10.3	0.21198		10.3	0.162655			10.29	0.212979	0.183121
10.31	0.217503		10.31	0.166352			10.3	0.21198	0.162655
10.32	0.220004		10.32	0.16477			10.31	0.217503	0.166352
10.33	0.213986		10.33	0.168152			10.32	0.220004	0.16477
10.34	0.216419		10.34	0.17665			10.33	0.213986	0.168152
10.35	0.212812		10.35	0.163756			10.34	0.216419	0.17665
10.36	0.215168		10.36	0.170639			10.35	0.212812	0.163756
10.37	0.212271		10.37	0.172605			10.36	0.215168	0.170639
10.38	0.212455		10.38	0.167523			10.37	0.212271	0.172605
10.39	0.218593		10.39	0.159477			10.38	0.212455	0.167523
10.4	0.219918		10.4	0.157792			10.39	0.218593	0.159477
10.41	0.20578		10.41	0.161556			10.4	0.219918	0.157792
10.42	0.224391		10.42	0.161633			10.41	0.20578	0.161556
10.43	0.218072		10.43	0.167937			10.42	0.224391	0.161633
10.44	0.220909		10.44	0.172506			10.43	0.218072	0.167937
10.45	0.207637		10.45	0.173244			10.44	0.220909	0.172506
10.46	0.214696		10.46	0.171162			10.45	0.207637	0.173244
10.47	0.217409		10.47	0.166489			10.46	0.214696	0.171162
10.48	0.210613		10.48	0.16552			10.47	0.217409	0.166489
10.49	0.209238		10.49	0.171402			10.48	0.210613	0.16552
10.5	0.218667		10.5	0.174144			10.49	0.209238	0.171402
10.51	0.217903		10.51	0.154677			10.5	0.218667	0.174144
10.52	0.210288		10.52	0.154977			10.51	0.217903	0.154677
10.53	0.214544		10.53	0.159367			10.52	0.210288	0.154977
10.54	0.200548		10.54	0.179365			10.53	0.214544	0.159367
10.55	0.19514		10.55	0.175031			10.54	0.200548	0.179365
10.56	0.205495		10.56	0.174554			10.55	0.19514	0.175031
10.57	0.205198		10.57	0.166898			10.56	0.205495	0.174554
10.58	0.192219		10.58	0.167915			10.57	0.205198	0.166898
10.59	0.197221		10.59	0.164567			10.58	0.192219	0.167915
10.6	0.19358		10.6	0.153173			10.59	0.197221	0.164567
10.61	0.191233		10.61	0.158994			10.6	0.19358	0.153173
10.62	0.190078		10.62	0.157533			10.61	0.191233	0.158994
10.63	0.194743		10.63	0.16232			10.62	0.190078	0.157533
10.64	0.208257		10.64	0.164034			10.63	0.194743	0.16232
10.65	0.216646		10.65	0.150507			10.64	0.208257	0.164034
10.66	0.208514		10.66	0.150968			10.65	0.216646	0.150507
10.67	0.209379		10.67	0.146606			10.66	0.208514	0.150968
10.68	0.210659		10.68	0.146818			10.67	0.209379	0.146606
10.69	0.216208		10.69	0.156043			10.68	0.210659	0.146818
10.7	0.207446		10.7	0.156699			10.69	0.216208	0.156043
10.71	0.211921		10.71	0.159392			10.7	0.207446	0.156699
10.72	0.204672		10.72	0.150205			10.71	0.211921	0.159392
10.73	0.215298		10.73	0.152195			10.72	0.204672	0.150205
10.74	0.202931		10.74	0.154475			10.73	0.215298	0.152195
10.75	0.214015		10.75	0.15143			10.74	0.202931	0.154475
10.76	0.207742		10.76	0.156707			10.75	0.214015	0.15143
10.77	0.209278		10.77	0.15249			10.76	0.207742	0.156707
10.78	0.216246		10.78	0.153266			10.77	0.209278	0.15249
10.79	0.221361		10.79	0.146142			10.78	0.216246	0.153266
10.8	0.207659		10.8	0.150425			10.79	0.221361	0.146142
10.81	0.209632		10.81	0.148886			10.8	0.207659	0.150425
10.82	0.205972		10.82	0.157273			10.81	0.209632	0.148886
10.83	0.208143		10.83	0.151361			10.82	0.205972	0.157273
10.84	0.210083		10.84	0.150426			10.83	0.208143	0.151361
10.85	0.209209		10.85	0.155529			10.84	0.210083	0.150426
10.86	0.219365		10.86	0.156039			10.85	0.209209	0.155529
10.87	0.219645		10.87	0.15468			10.86	0.219365	0.156039
10.88	0.217948		10.88	0.156824			10.87	0.219645	0.15468
10.89	0.212449		10.89	0.157924			10.88	0.217948	0.156824
10.9	0.2088		10.9	0.160978			10.89	0.212449	0.157924
10.91	0.213838		10.91	0.159657			10.9	0.2088	0.160978
10.92	0.210327		10.92	0.162281			10.91	0.213838	0.159657
10.93	0.219142		10.93	0.162685			10.92	0.210327	0.162281
10.94	0.224661		10.94	0.165546			10.93	0.219142	0.162685
10.95	0.222233		10.95	0.178743			10.94	0.224661	0.165546
10.96	0.210377		10.96	0.17761			10.95	0.222233	0.178743
10.97	0.209298		10.97	0.174251			10.96	0.210377	0.17761
10.98	0.217098		10.98	0.182275			10.97	0.209298	0.174251
10.99	0.212778		10.99	0.176522			10.98	0.217098	0.182275
11	0.208961		11	0.167144			10.99	0.212778	0.176522
11.01	0.200228		11.01	0.172704			11	0.208961	0.167144
11.02	0.201833		11.02	0.169061			11.01	0.200228	0.172704
11.03	0.202382		11.03	0.169145			11.02	0.201833	0.169061
11.04	0.215864		11.04	0.169063			11.03	0.202382	0.169145
11.05	0.20885		11.05	0.17287			11.04	0.215864	0.169063
11.06	0.215151		11.06	0.165492			11.05	0.20885	0.17287
11.07	0.203685		11.07	0.157923			11.06	0.215151	0.165492
11.08	0.201011		11.08	0.15957			11.07	0.203685	0.157923
11.09	0.209872		11.09	0.152788			11.08	0.201011	0.15957
11.1	0.198407		11.1	0.161904			11.09	0.209872	0.152788
11.11	0.199982		11.11	0.166046			11.1	0.198407	0.161904
11.12	0.196917		11.12	0.168515			11.11	0.199982	0.166046
11.13	0.20774		11.13	0.166068			11.12	0.196917	0.168515
11.14	0.216088		11.14	0.175672			11.13	0.20774	0.166068
11.15	0.213413		11.15	0.170676			11.14	0.216088	0.175672
11.16	0.216959		11.16	0.164818			11.15	0.213413	0.170676
11.17	0.208689		11.17	0.172272			11.16	0.216959	0.164818
11.18	0.203565		11.18	0.178134			11.17	0.208689	0.172272
11.19	0.215632		11.19	0.1701			11.18	0.203565	0.178134
11.2	0.218463		11.2	0.173402			11.19	0.215632	0.1701
11.21	0.213096		11.21	0.176747			11.2	0.218463	0.173402
11.22	0.202995		11.22	0.17834			11.21	0.213096	0.176747
11.23	0.203063		11.23	0.176684			11.22	0.202995	0.17834
11.24	0.21568		11.24	0.178516			11.23	0.203063	0.176684
11.25	0.208138		11.25	0.174891			11.24	0.21568	0.178516
11.26	0.223217		11.26	0.185811			11.25	0.208138	0.174891
11.27	0.23625		11.27	0.175895			11.26	0.223217	0.185811
11.28	0.224158		11.28	0.176546			11.27	0.23625	0.175895
11.29	0.238091		11.29	0.18653			11.28	0.224158	0.176546
11.3	0.231344		11.3	0.187288			11.29	0.238091	0.18653
11.31	0.22449		11.31	0.18533			11.3	0.231344	0.187288
11.32	0.21906		11.32	0.178051			11.31	0.22449	0.18533
11.33	0.23605		11.33	0.182631			11.32	0.21906	0.178051
11.34	0.240387		11.34	0.170193			11.33	0.23605	0.182631
11.35	0.232561		11.35	0.16672			11.34	0.240387	0.170193
11.36	0.235865		11.36	0.171849			11.35	0.232561	0.16672
11.37	0.238592		11.37	0.188845			11.36	0.235865	0.171849
11.38	0.24617		11.38	0.188145			11.37	0.238592	0.188845
11.39	0.244461		11.39	0.193478			11.38	0.24617	0.188145
11.4	0.243735		11.4	0.18174			11.39	0.244461	0.193478
11.41	0.241782		11.41	0.186984			11.4	0.243735	0.18174
11.42	0.231802		11.42	0.181206			11.41	0.241782	0.186984
11.43	0.211429		11.43	0.176526			11.42	0.231802	0.181206
11.44	0.205239		11.44	0.181116			11.43	0.211429	0.176526
11.45	0.21142		11.45	0.172264			11.44	0.205239	0.181116
11.46	0.217855		11.46	0.183223			11.45	0.21142	0.172264
11.47	0.210964		11.47	0.175046			11.46	0.217855	0.183223
11.48	0.206571		11.48	0.162936			11.47	0.210964	0.175046
11.49	0.203104		11.49	0.158212			11.48	0.206571	0.162936
11.5	0.210116		11.5	0.156713			11.49	0.203104	0.158212
11.51	0.205087		11.51	0.1625			11.5	0.210116	0.156713
11.52	0.205892		11.52	0.154881			11.51	0.205087	0.1625
11.53	0.210132		11.53	0.160272			11.52	0.205892	0.154881
11.54	0.201934		11.54	0.15816			11.53	0.210132	0.160272
11.55	0.202703		11.55	0.169144			11.54	0.201934	0.15816
11.56	0.195839		11.56	0.166421			11.55	0.202703	0.169144
11.57	0.211312		11.57	0.15771			11.56	0.195839	0.166421
11.58	0.204558		11.58	0.16053			11.57	0.211312	0.15771
11.59	0.204622		11.59	0.158577			11.58	0.204558	0.16053
11.6	0.201516		11.6	0.160781			11.59	0.204622	0.158577
11.61	0.193512		11.61	0.171979			11.6	0.201516	0.160781
11.62	0.199123		11.62	0.17176			11.61	0.193512	0.171979
11.63	0.195108		11.63	0.16378			11.62	0.199123	0.17176
11.64	0.210686		11.64	0.166569			11.63	0.195108	0.16378
11.65	0.224477		11.65	0.169766			11.64	0.210686	0.166569
11.66	0.220132		11.66	0.168128			11.65	0.224477	0.169766
11.67	0.231301		11.67	0.167645			11.66	0.220132	0.168128
11.68	0.229465		11.68	0.167734			11.67	0.231301	0.167645
11.69	0.231372		11.69	0.167679			11.68	0.229465	0.167734
11.7	0.237708		11.7	0.171775			11.69	0.231372	0.167679
11.71	0.232728		11.71	0.170999			11.7	0.237708	0.171775
11.72	0.246216		11.72	0.169626			11.71	0.232728	0.170999
11.73	0.25237		11.73	0.169645			11.72	0.246216	0.169626
11.74	0.236213		11.74	0.173913			11.73	0.25237	0.169645
11.75	0.244113		11.75	0.169871			11.74	0.236213	0.173913
11.76	0.242312		11.76	0.162619			11.75	0.244113	0.169871
11.77	0.258028		11.77	0.158317			11.76	0.242312	0.162619
11.78	0.250783		11.78	0.152226			11.77	0.258028	0.158317
11.79	0.226946		11.79	0.156438			11.78	0.250783	0.152226
11.8	0.223874		11.8	0.148066			11.79	0.226946	0.156438
11.81	0.236203		11.81	0.156988			11.8	0.223874	0.148066
11.82	0.223337		11.82	0.15769			11.81	0.236203	0.156988
11.83	0.236408		11.83	0.160153			11.82	0.223337	0.15769
11.84	0.229397		11.84	0.164798			11.83	0.236408	0.160153
11.85	0.225866		11.85	0.166295			11.84	0.229397	0.164798
11.86	0.22727		11.86	0.173375			11.85	0.225866	0.166295
11.87	0.246735		11.87	0.169274			11.86	0.22727	0.173375
11.88	0.257429		11.88	0.174698			11.87	0.246735	0.169274
11.89	0.243534		11.89	0.171211			11.88	0.257429	0.174698
11.9	0.221937		11.9	0.177067			11.89	0.243534	0.171211
11.91	0.208689		11.91	0.180475			11.9	0.221937	0.177067
11.92	0.215313		11.92	0.177034			11.91	0.208689	0.180475
11.93	0.208741		11.93	0.172376			11.92	0.215313	0.177034
11.94	0.202582		11.94	0.174921			11.93	0.208741	0.172376
11.95	0.214719		11.95	0.172061			11.94	0.202582	0.174921
11.96	0.233713		11.96	0.171354			11.95	0.214719	0.172061
11.97	0.241307		11.97	0.170786			11.96	0.233713	0.171354
11.98	0.235605		11.98	0.164743			11.97	0.241307	0.170786
11.99	0.235872		11.99	0.167495			11.98	0.235605	0.164743
12	0.23868		12	0.167431			11.99	0.235872	0.167495
12.01	0.242534		12.01	0.169239			12	0.23868	0.167431
12.02	0.24958		12.02	0.172546			12.01	0.242534	0.169239
12.03	0.270479		12.03	0.172686			12.02	0.24958	0.172546
12.04	0.268209		12.04	0.16472			12.03	0.270479	0.172686
12.05	0.284954		12.05	0.167104			12.04	0.268209	0.16472
12.06	0.282851		12.06	0.16723			12.05	0.284954	0.167104
12.07	0.265115		12.07	0.182933			12.06	0.282851	0.16723
12.08	0.253151		12.08	0.187524			12.07	0.265115	0.182933
12.09	0.255484		12.09	0.192941			12.08	0.253151	0.187524
12.1	0.246147		12.1	0.190372			12.09	0.255484	0.192941
12.11	0.262817		12.11	0.176111			12.1	0.246147	0.190372
12.12	0.25454		12.12	0.182348			12.11	0.262817	0.176111
12.13	0.246102		12.13	0.177154			12.12	0.25454	0.182348
12.14	0.244837		12.14	0.191359			12.13	0.246102	0.177154
12.15	0.232343		12.15	0.196729			12.14	0.244837	0.191359
12.16	0.219521		12.16	0.205646			12.15	0.232343	0.196729
12.17	0.217262		12.17	0.198226			12.16	0.219521	0.205646
12.18	0.225389		12.18	0.193897			12.17	0.217262	0.198226
12.19	0.214779		12.19	0.185094			12.18	0.225389	0.193897
12.2	0.200352		12.2	0.187273			12.19	0.214779	0.185094
12.21	0.205458		12.21	0.18413			12.2	0.200352	0.187273
12.22	0.210276		12.22	0.187348			12.21	0.205458	0.18413
12.23	0.211088		12.23	0.190868			12.22	0.210276	0.187348
12.24	0.201203		12.24	0.197499			12.23	0.211088	0.190868
12.25	0.198572		12.25	0.184437			12.24	0.201203	0.197499
12.26	0.21292		12.26	0.189931			12.25	0.198572	0.184437
12.27	0.22531		12.27	0.195925			12.26	0.21292	0.189931
12.28	0.225227		12.28	0.194481			12.27	0.22531	0.195925
12.29	0.238314		12.29	0.191002			12.28	0.225227	0.194481
12.3	0.24057		12.3	0.189877			12.29	0.238314	0.191002
12.31	0.23789		12.31	0.184584			12.3	0.24057	0.189877
12.32	0.243955		12.32	0.1848			12.31	0.23789	0.184584
12.33	0.250653		12.33	0.189594			12.32	0.243955	0.1848
12.34	0.258035		12.34	0.182764			12.33	0.250653	0.189594
12.35	0.253334		12.35	0.198261			12.34	0.258035	0.182764
12.36	0.264891		12.36	0.202617			12.35	0.253334	0.198261
12.37	0.257868		12.37	0.188033			12.36	0.264891	0.202617
12.38	0.279047		12.38	0.182468			12.37	0.257868	0.188033
12.39	0.270504		12.39	0.193145			12.38	0.279047	0.182468
12.4	0.255604		12.4	0.182033			12.39	0.270504	0.193145
12.41	0.255681		12.41	0.181543			12.4	0.255604	0.182033
12.42	0.258102		12.42	0.175027			12.41	0.255681	0.181543
12.43	0.257904		12.43	0.185935			12.42	0.258102	0.175027
12.44	0.241308		12.44	0.175107			12.43	0.257904	0.185935
12.45	0.247723		12.45	0.172307			12.44	0.241308	0.175107
12.46	0.224003		12.46	0.190218			12.45	0.247723	0.172307
12.47	0.240002		12.47	0.193555			12.46	0.224003	0.190218
12.48	0.245082		12.48	0.197162			12.47	0.240002	0.193555
12.49	0.236192		12.49	0.202515			12.48	0.245082	0.197162
12.5	0.244743		12.5	0.201533			12.49	0.236192	0.202515
12.51	0.254782		12.51	0.19003			12.5	0.244743	0.201533
12.52	0.253845		12.52	0.192965			12.51	0.254782	0.19003
12.53	0.252312		12.53	0.187095			12.52	0.253845	0.192965
12.54	0.257616		12.54	0.192703			12.53	0.252312	0.187095
12.55	0.251454		12.55	0.192872			12.54	0.257616	0.192703
12.56	0.253765		12.56	0.190284			12.55	0.251454	0.192872
12.57	0.249755		12.57	0.186008			12.56	0.253765	0.190284
12.58	0.25529		12.58	0.18269			12.57	0.249755	0.186008
12.59	0.245861		12.59	0.180356			12.58	0.25529	0.18269
12.6	0.249381		12.6	0.170742			12.59	0.245861	0.180356
12.61	0.25913		12.61	0.177242			12.6	0.249381	0.170742
12.62	0.250323		12.62	0.170691			12.61	0.25913	0.177242
12.63	0.256526		12.63	0.169994			12.62	0.250323	0.170691
12.64	0.245837		12.64	0.172027			12.63	0.256526	0.169994
12.65	0.24935		12.65	0.178959			12.64	0.245837	0.172027
12.66	0.256216		12.66	0.172391			12.65	0.24935	0.178959
12.67	0.253912		12.67	0.184404			12.66	0.256216	0.172391
12.68	0.240048		12.68	0.191645			12.67	0.253912	0.184404
12.69	0.241467		12.69	0.183911			12.68	0.240048	0.191645
12.7	0.238743		12.7	0.183543			12.69	0.241467	0.183911
12.71	0.233977		12.71	0.186442			12.7	0.238743	0.183543
12.72	0.227831		12.72	0.193811			12.71	0.233977	0.186442
12.73	0.239733		12.73	0.192514			12.72	0.227831	0.193811
12.74	0.231628		12.74	0.193873			12.73	0.239733	0.192514
12.75	0.241031		12.75	0.203707			12.74	0.231628	0.193873
12.76	0.241038		12.76	0.19457			12.75	0.241031	0.203707
12.77	0.234094		12.77	0.194664			12.76	0.241038	0.19457
12.78	0.23876		12.78	0.192251			12.77	0.234094	0.194664
12.79	0.243322		12.79	0.194871			12.78	0.23876	0.192251
12.8	0.237693		12.8	0.202448			12.79	0.243322	0.194871
12.81	0.226484		12.81	0.197864			12.8	0.237693	0.202448
12.82	0.226083		12.82	0.200623			12.81	0.226484	0.197864
12.83	0.227873		12.83	0.202201			12.82	0.226083	0.200623
12.84	0.242894		12.84	0.208361			12.83	0.227873	0.202201
12.85	0.244214		12.85	0.197298			12.84	0.242894	0.208361
12.86	0.261305		12.86	0.201103			12.85	0.244214	0.197298
12.87	0.260476		12.87	0.199522			12.86	0.261305	0.201103
12.88	0.265059		12.88	0.198016			12.87	0.260476	0.199522
12.89	0.274056		12.89	0.193169			12.88	0.265059	0.198016
12.9	0.277188		12.9	0.195542			12.89	0.274056	0.193169
12.91	0.269651		12.91	0.185566			12.9	0.277188	0.195542
12.92	0.26928		12.92	0.184886			12.91	0.269651	0.185566
12.93	0.272781		12.93	0.181714			12.92	0.26928	0.184886
12.94	0.286443		12.94	0.18342			12.93	0.272781	0.181714
12.95	0.299499		12.95	0.187539			12.94	0.286443	0.18342
12.96	0.299669		12.96	0.19032			12.95	0.299499	0.187539
12.97	0.288465		12.97	0.182417			12.96	0.299669	0.19032
12.98	0.285549		12.98	0.189212			12.97	0.288465	0.182417
12.99	0.268506		12.99	0.189124			12.98	0.285549	0.189212
13	0.273332		13	0.185918			12.99	0.268506	0.189124
13.01	0.274526		13.01	0.183815			13	0.273332	0.185918
13.02	0.257158		13.02	0.17701			13.01	0.274526	0.183815
13.03	0.273235		13.03	0.185786			13.02	0.257158	0.17701
13.04	0.277396		13.04	0.17076			13.03	0.273235	0.185786
13.05	0.276762		13.05	0.173852			13.04	0.277396	0.17076
13.06	0.274596		13.06	0.159773			13.05	0.276762	0.173852
13.07	0.274576		13.07	0.175391			13.06	0.274596	0.159773
13.08	0.273201		13.08	0.18654			13.07	0.274576	0.175391
13.09	0.278797		13.09	0.17622			13.08	0.273201	0.18654
13.1	0.283677		13.1	0.177101			13.09	0.278797	0.17622
13.11	0.274347		13.11	0.177027			13.1	0.283677	0.177101
13.12	0.287983		13.12	0.188775			13.11	0.274347	0.177027
13.13	0.268223		13.13	0.171404			13.12	0.287983	0.188775
13.14	0.254443		13.14	0.17932			13.13	0.268223	0.171404
13.15	0.267123		13.15	0.171535			13.14	0.254443	0.17932
13.16	0.258278		13.16	0.180413			13.15	0.267123	0.171535
13.17	0.26228		13.17	0.174231			13.16	0.258278	0.180413
13.18	0.251221		13.18	0.17555			13.17	0.26228	0.174231
13.19	0.25618		13.19	0.167105			13.18	0.251221	0.17555
13.2	0.244598		13.2	0.168977			13.19	0.25618	0.167105
13.21	0.251069		13.21	0.181447			13.2	0.244598	0.168977
13.22	0.236888		13.22	0.187983			13.21	0.251069	0.181447
13.23	0.244281		13.23	0.181765			13.22	0.236888	0.187983
13.24	0.235925		13.24	0.185242			13.23	0.244281	0.181765
13.25	0.242553		13.25	0.183016			13.24	0.235925	0.185242
13.26	0.242568		13.26	0.17805			13.25	0.242553	0.183016
13.27	0.249789		13.27	0.187242			13.26	0.242568	0.17805
13.28	0.251058		13.28	0.182717			13.27	0.249789	0.187242
13.29	0.258341		13.29	0.18629			13.28	0.251058	0.182717
13.3	0.245516		13.3	0.190054			13.29	0.258341	0.18629
13.31	0.251507		13.31	0.186287			13.3	0.245516	0.190054
13.32	0.272528		13.32	0.19258			13.31	0.251507	0.186287
13.33	0.262857		13.33	0.195549			13.32	0.272528	0.19258
13.34	0.249598		13.34	0.187511			13.33	0.262857	0.195549
13.35	0.252477		13.35	0.178281			13.34	0.249598	0.187511
13.36	0.253546		13.36	0.180752			13.35	0.252477	0.178281
13.37	0.241689		13.37	0.173475			13.36	0.253546	0.180752
13.38	0.242921		13.38	0.184165			13.37	0.241689	0.173475
13.39	0.249926		13.39	0.17164			13.38	0.242921	0.184165
13.4	0.243375		13.4	0.176264			13.39	0.249926	0.17164
13.41	0.244648		13.41	0.182967			13.4	0.243375	0.176264
13.42	0.250233		13.42	0.184499			13.41	0.244648	0.182967
13.43	0.235424		13.43	0.185341			13.42	0.250233	0.184499
13.44	0.240868		13.44	0.177508			13.43	0.235424	0.185341
13.45	0.248458		13.45	0.186978			13.44	0.240868	0.177508
13.46	0.242466		13.46	0.187003			13.45	0.248458	0.186978
13.47	0.243816		13.47	0.187243			13.46	0.242466	0.187003
13.48	0.247636		13.48	0.18121			13.47	0.243816	0.187243
13.49	0.233105		13.49	0.180632			13.48	0.247636	0.18121
13.5	0.235714		13.5	0.190953			13.49	0.233105	0.180632
13.51	0.23052		13.51	0.187674			13.5	0.235714	0.190953
13.52	0.233718		13.52	0.188803			13.51	0.23052	0.187674
13.53	0.232417		13.53	0.189779			13.52	0.233718	0.188803
13.54	0.238705		13.54	0.180389			13.53	0.232417	0.189779
13.55	0.230228		13.55	0.171542			13.54	0.238705	0.180389
13.56	0.229149		13.56	0.176318			13.55	0.230228	0.171542
13.57	0.236126		13.57	0.179621			13.56	0.229149	0.176318
13.58	0.219441		13.58	0.173173			13.57	0.236126	0.179621
13.59	0.22135		13.59	0.17408			13.58	0.219441	0.173173
13.6	0.216097		13.6	0.172881			13.59	0.22135	0.17408
13.61	0.224942		13.61	0.175436			13.6	0.216097	0.172881
13.62	0.235687		13.62	0.170601			13.61	0.224942	0.175436
13.63	0.221656		13.63	0.17052			13.62	0.235687	0.170601
13.64	0.228966		13.64	0.176425			13.63	0.221656	0.17052
13.65	0.232288		13.65	0.181129			13.64	0.228966	0.176425
13.66	0.22855		13.66	0.178656			13.65	0.232288	0.181129
13.67	0.215074		13.67	0.170837			13.66	0.22855	0.178656
13.68	0.220733		13.68	0.166631			13.67	0.215074	0.170837
13.69	0.212909		13.69	0.173623			13.68	0.220733	0.166631
13.7	0.207839		13.7	0.179838			13.69	0.212909	0.173623
13.71	0.213049		13.71	0.177407			13.7	0.207839	0.179838
13.72	0.219096		13.72	0.171802			13.71	0.213049	0.177407
13.73	0.242943		13.73	0.167385			13.72	0.219096	0.171802
13.74	0.235968		13.74	0.169787			13.73	0.242943	0.167385
13.75	0.226288		13.75	0.171051			13.74	0.235968	0.169787
13.76	0.212181		13.76	0.170145			13.75	0.226288	0.171051
13.77	0.225033		13.77	0.171628			13.76	0.212181	0.170145
13.78	0.224609		13.78	0.170363			13.77	0.225033	0.171628
13.79	0.224207		13.79	0.169045			13.78	0.224609	0.170363
13.8	0.224787		13.8	0.173333			13.79	0.224207	0.169045
13.81	0.232163		13.81	0.175376			13.8	0.224787	0.173333
13.82	0.229264		13.82	0.175289			13.81	0.232163	0.175376
13.83	0.230636		13.83	0.173001			13.82	0.229264	0.175289
13.84	0.221553		13.84	0.177199			13.83	0.230636	0.173001
13.85	0.221067		13.85	0.178351			13.84	0.221553	0.177199
13.86	0.213734		13.86	0.163948			13.85	0.221067	0.178351
13.87	0.21685		13.87	0.172989			13.86	0.213734	0.163948
13.88	0.202924		13.88	0.181525			13.87	0.21685	0.172989
13.89	0.213813		13.89	0.184548			13.88	0.202924	0.181525
13.9	0.214885		13.9	0.18881			13.89	0.213813	0.184548
13.91	0.199829		13.91	0.18204			13.9	0.214885	0.18881
13.92	0.207437		13.92	0.183018			13.91	0.199829	0.18204
13.93	0.216164		13.93	0.184907			13.92	0.207437	0.183018
13.94	0.206327		13.94	0.18793			13.93	0.216164	0.184907
13.95	0.21059		13.95	0.192367			13.94	0.206327	0.18793
13.96	0.215494		13.96	0.200087			13.95	0.21059	0.192367
13.97	0.218791		13.97	0.184484			13.96	0.215494	0.200087
13.98	0.218604		13.98	0.176723			13.97	0.218791	0.184484
13.99	0.204986		13.99	0.167589			13.98	0.218604	0.176723
14	0.211901		14	0.170268			13.99	0.204986	0.167589
14.01	0.207128		14.01	0.172863			14	0.211901	0.170268
14.02	0.213463		14.02	0.170502			14.01	0.207128	0.172863
14.03	0.216302		14.03	0.174148			14.02	0.213463	0.170502
14.04	0.221615		14.04	0.171539			14.03	0.216302	0.174148
14.05	0.23589		14.05	0.168247			14.04	0.221615	0.171539
14.06	0.228937		14.06	0.171182			14.05	0.23589	0.168247
14.07	0.225314		14.07	0.181175			14.06	0.228937	0.171182
14.08	0.217786		14.08	0.171435			14.07	0.225314	0.181175
14.09	0.220087		14.09	0.179369			14.08	0.217786	0.171435
14.1	0.219834		14.1	0.179018			14.09	0.220087	0.179369
14.11	0.218607		14.11	0.174248			14.1	0.219834	0.179018
14.12	0.215087		14.12	0.176335			14.11	0.218607	0.174248
14.13	0.217637		14.13	0.171879			14.12	0.215087	0.176335
14.14	0.21961		14.14	0.184381			14.13	0.217637	0.171879
14.15	0.215757		14.15	0.201972			14.14	0.21961	0.184381
14.16	0.208283		14.16	0.190245			14.15	0.215757	0.201972
14.17	0.207738		14.17	0.184632			14.16	0.208283	0.190245
14.18	0.211824		14.18	0.195706			14.17	0.207738	0.184632
14.19	0.220243		14.19	0.186259			14.18	0.211824	0.195706
14.2	0.222427		14.2	0.184906			14.19	0.220243	0.186259
14.21	0.225156		14.21	0.194635			14.2	0.222427	0.184906
14.22	0.231035		14.22	0.200185			14.21	0.225156	0.194635
14.23	0.220476		14.23	0.196549			14.22	0.231035	0.200185
14.24	0.235023		14.24	0.188103			14.23	0.220476	0.196549
14.25	0.221946		14.25	0.18789			14.24	0.235023	0.188103
14.26	0.223799		14.26	0.199293			14.25	0.221946	0.18789
14.27	0.233103		14.27	0.196549			14.26	0.223799	0.199293
14.28	0.231013		14.28	0.183679			14.27	0.233103	0.196549
14.29	0.22476		14.29	0.195183			14.28	0.231013	0.183679
14.3	0.230235		14.3	0.189671			14.29	0.22476	0.195183
14.31	0.217602		14.31	0.183481			14.3	0.230235	0.189671
14.32	0.211327		14.32	0.180663			14.31	0.217602	0.183481
14.33	0.220617		14.33	0.173982			14.32	0.211327	0.180663
14.34	0.22456		14.34	0.17546			14.33	0.220617	0.173982
14.35	0.221425		14.35	0.169023			14.34	0.22456	0.17546
14.36	0.207516		14.36	0.175224			14.35	0.221425	0.169023
14.37	0.222661		14.37	0.175086			14.36	0.207516	0.175224
14.38	0.218746		14.38	0.169616			14.37	0.222661	0.175086
14.39	0.220175		14.39	0.171258			14.38	0.218746	0.169616
14.4	0.22679		14.4	0.16747			14.39	0.220175	0.171258
14.41	0.223102		14.41	0.175392			14.4	0.22679	0.16747
14.42	0.23236		14.42	0.186518			14.41	0.223102	0.175392
14.43	0.224563		14.43	0.188189			14.42	0.23236	0.186518
14.44	0.217445		14.44	0.1951			14.43	0.224563	0.188189
14.45	0.219292		14.45	0.18314			14.44	0.217445	0.1951
14.46	0.219924		14.46	0.190673			14.45	0.219292	0.18314
14.47	0.216153		14.47	0.177392			14.46	0.219924	0.190673
14.48	0.219564		14.48	0.177888			14.47	0.216153	0.177392
14.49	0.20195		14.49	0.174577			14.48	0.219564	0.177888
14.5	0.205142		14.5	0.166402			14.49	0.20195	0.174577
14.51	0.213568		14.51	0.173093			14.5	0.205142	0.166402
14.52	0.205764		14.52	0.176111			14.51	0.213568	0.173093
14.53	0.20546		14.53	0.175509			14.52	0.205764	0.176111
14.54	0.205923		14.54	0.185642			14.53	0.20546	0.175509
14.55	0.204715		14.55	0.184827			14.54	0.205923	0.185642
14.56	0.205437		14.56	0.1782			14.55	0.204715	0.184827
14.57	0.194787		14.57	0.188588			14.56	0.205437	0.1782
14.58	0.207107		14.58	0.184783			14.57	0.194787	0.188588
14.59	0.208879		14.59	0.183195			14.58	0.207107	0.184783
14.6	0.203883		14.6	0.180838			14.59	0.208879	0.183195
14.61	0.192065		14.61	0.187328			14.6	0.203883	0.180838
14.62	0.19612		14.62	0.186262			14.61	0.192065	0.187328
14.63	0.195631		14.63	0.193441			14.62	0.19612	0.186262
14.64	0.192038		14.64	0.201035			14.63	0.195631	0.193441
14.65	0.208428		14.65	0.19828			14.64	0.192038	0.201035
14.66	0.216637		14.66	0.192341			14.65	0.208428	0.19828
14.67	0.219393		14.67	0.194945			14.66	0.216637	0.192341
14.68	0.228003		14.68	0.192072			14.67	0.219393	0.194945
14.69	0.222173		14.69	0.194421			14.68	0.228003	0.192072
14.7	0.222543		14.7	0.186937			14.69	0.222173	0.194421
14.71	0.215763		14.71	0.185198			14.7	0.222543	0.186937
14.72	0.209156		14.72	0.176562			14.71	0.215763	0.185198
14.73	0.213404		14.73	0.172767			14.72	0.209156	0.176562
14.74	0.206585		14.74	0.172199			14.73	0.213404	0.172767
14.75	0.21662		14.75	0.174216			14.74	0.206585	0.172199
14.76	0.213327		14.76	0.180515			14.75	0.21662	0.174216
14.77	0.208614		14.77	0.196528			14.76	0.213327	0.180515
14.78	0.207975		14.78	0.198798			14.77	0.208614	0.196528
14.79	0.217089		14.79	0.19686			14.78	0.207975	0.198798
14.8	0.202293		14.8	0.186643			14.79	0.217089	0.19686
14.81	0.20293		14.81	0.18761			14.8	0.202293	0.186643
14.82	0.207587		14.82	0.182646			14.81	0.20293	0.18761
14.83	0.208696		14.83	0.190257			14.82	0.207587	0.182646
14.84	0.200662		14.84	0.190652			14.83	0.208696	0.190257
14.85	0.202896		14.85	0.182036			14.84	0.200662	0.190652
14.86	0.207498		14.86	0.174567			14.85	0.202896	0.182036
14.87	0.203513		14.87	0.182895			14.86	0.207498	0.174567
14.88	0.209516		14.88	0.186993			14.87	0.203513	0.182895
14.89	0.218126		14.89	0.186751			14.88	0.209516	0.186993
14.9	0.221238		14.9	0.179582			14.89	0.218126	0.186751
14.91	0.230382		14.91	0.178837			14.9	0.221238	0.179582
14.92	0.225367		14.92	0.171372			14.91	0.230382	0.178837
14.93	0.200428		14.93	0.173256			14.92	0.225367	0.171372
14.94	0.214482		14.94	0.176336			14.93	0.200428	0.173256
14.95	0.216452		14.95	0.176236			14.94	0.214482	0.176336
14.96	0.211622		14.96	0.176197			14.95	0.216452	0.176236
14.97	0.234252		14.97	0.178143			14.96	0.211622	0.176197
14.98	0.225907		14.98	0.16656			14.97	0.234252	0.178143
14.99	0.230608		14.99	0.184273			14.98	0.225907	0.16656
15	0.22711		15	0.196047			14.99	0.230608	0.184273
15.01	0.22462		15.01	0.193888			15	0.22711	0.196047
15.02	0.219472		15.02	0.201019			15.01	0.22462	0.193888
15.03	0.223361		15.03	0.189687			15.02	0.219472	0.201019
15.04	0.224594		15.04	0.17531			15.03	0.223361	0.189687
15.05	0.214166		15.05	0.183976			15.04	0.224594	0.17531
15.06	0.211867		15.06	0.177681			15.05	0.214166	0.183976
15.07	0.210987		15.07	0.17622			15.06	0.211867	0.177681
15.08	0.205438		15.08	0.190592			15.07	0.210987	0.17622
15.09	0.205911		15.09	0.179834			15.08	0.205438	0.190592
15.1	0.218919		15.1	0.177401			15.09	0.205911	0.179834
15.11	0.213007		15.11	0.172602			15.1	0.218919	0.177401
15.12	0.212819		15.12	0.174522			15.11	0.213007	0.172602
15.13	0.217574		15.13	0.168566			15.12	0.212819	0.174522
15.14	0.21014		15.14	0.190622			15.13	0.217574	0.168566
15.15	0.225697		15.15	0.181636			15.14	0.21014	0.190622
15.16	0.218271		15.16	0.176331			15.15	0.225697	0.181636
15.17	0.229253		15.17	0.181949			15.16	0.218271	0.176331
15.18	0.215535		15.18	0.181973			15.17	0.229253	0.181949
15.19	0.214356		15.19	0.181027			15.18	0.215535	0.181973
15.2	0.213953		15.2	0.172648			15.19	0.214356	0.181027
15.21	0.229453		15.21	0.169154			15.2	0.213953	0.172648
15.22	0.220544		15.22	0.171566			15.21	0.229453	0.169154
15.23	0.220819		15.23	0.172234			15.22	0.220544	0.171566
15.24	0.230188		15.24	0.17816			15.23	0.220819	0.172234
15.25	0.230431		15.25	0.184505			15.24	0.230188	0.17816
15.26	0.244236		15.26	0.182232			15.25	0.230431	0.184505
15.27	0.238163		15.27	0.178118			15.26	0.244236	0.182232
15.28	0.247164		15.28	0.17369			15.27	0.238163	0.178118
15.29	0.256989		15.29	0.187817			15.28	0.247164	0.17369
15.3	0.223987		15.3	0.196934			15.29	0.256989	0.187817
15.31	0.215724		15.31	0.20227			15.3	0.223987	0.196934
15.32	0.209515		15.32	0.186373			15.31	0.215724	0.20227
15.33	0.204721		15.33	0.179839			15.32	0.209515	0.186373
15.34	0.221241		15.34	0.178722			15.33	0.204721	0.179839
15.35	0.209474		15.35	0.181678			15.34	0.221241	0.178722
15.36	0.213938		15.36	0.171897			15.35	0.209474	0.181678
15.37	0.219876		15.37	0.179011			15.36	0.213938	0.171897
15.38	0.213266		15.38	0.182381			15.37	0.219876	0.179011
15.39	0.211687		15.39	0.192182			15.38	0.213266	0.182381
15.4	0.212348		15.4	0.1783			15.39	0.211687	0.192182
15.41	0.211127		15.41	0.176184			15.4	0.212348	0.1783
15.42	0.215214		15.42	0.180064			15.41	0.211127	0.176184
15.43	0.205316		15.43	0.181293			15.42	0.215214	0.180064
15.44	0.201192		15.44	0.176844			15.43	0.205316	0.181293
15.45	0.209688		15.45	0.174874			15.44	0.201192	0.176844
15.46	0.221709		15.46	0.188635			15.45	0.209688	0.174874
15.47	0.214439		15.47	0.176806			15.46	0.221709	0.188635
15.48	0.210689		15.48	0.178496			15.47	0.214439	0.176806
15.49	0.208876		15.49	0.182013			15.48	0.210689	0.178496
15.5	0.209569		15.5	0.176227			15.49	0.208876	0.182013
15.51	0.224214		15.51	0.179333			15.5	0.209569	0.176227
15.52	0.224317		15.52	0.181613			15.51	0.224214	0.179333
15.53	0.221138		15.53	0.176062			15.52	0.224317	0.181613
15.54	0.230969		15.54	0.178197			15.53	0.221138	0.176062
15.55	0.221954		15.55	0.188632			15.54	0.230969	0.178197
15.56	0.226464		15.56	0.198127			15.55	0.221954	0.188632
15.57	0.230685		15.57	0.187479			15.56	0.226464	0.198127
15.58	0.221723		15.58	0.175155			15.57	0.230685	0.187479
15.59	0.217954		15.59	0.177137			15.58	0.221723	0.175155
15.6	0.219088		15.6	0.172661			15.59	0.217954	0.177137
15.61	0.223695		15.61	0.175688			15.6	0.219088	0.172661
15.62	0.214608		15.62	0.176131			15.61	0.223695	0.175688
15.63	0.214122		15.63	0.18462			15.62	0.214608	0.176131
15.64	0.228143		15.64	0.182709			15.63	0.214122	0.18462
15.65	0.226602		15.65	0.176569			15.64	0.228143	0.182709
15.66	0.230969		15.66	0.185386			15.65	0.226602	0.176569
15.67	0.223039		15.67	0.182397			15.66	0.230969	0.185386
15.68	0.219314		15.68	0.199664			15.67	0.223039	0.182397
15.69	0.214638		15.69	0.195778			15.68	0.219314	0.199664
15.7	0.214325		15.7	0.199337			15.69	0.214638	0.195778
15.71	0.226241		15.71	0.189231			15.7	0.214325	0.199337
15.72	0.210365		15.72	0.185976			15.71	0.226241	0.189231
15.73	0.227862		15.73	0.185715			15.72	0.210365	0.185976
15.74	0.250186		15.74	0.196605			15.73	0.227862	0.185715
15.75	0.243764		15.75	0.201472			15.74	0.250186	0.196605
15.76	0.237074		15.76	0.208026			15.75	0.243764	0.201472
15.77	0.237184		15.77	0.20707			15.76	0.237074	0.208026
15.78	0.233112		15.78	0.201922			15.77	0.237184	0.20707
15.79	0.230404		15.79	0.197351			15.78	0.233112	0.201922
15.8	0.224208		15.8	0.198417			15.79	0.230404	0.197351
15.81	0.226198		15.81	0.189864			15.8	0.224208	0.198417
15.82	0.225811		15.82	0.194888			15.81	0.226198	0.189864
15.83	0.220444		15.83	0.190241			15.82	0.225811	0.194888
15.84	0.226922		15.84	0.186418			15.83	0.220444	0.190241
15.85	0.22354		15.85	0.184554			15.84	0.226922	0.186418
15.86	0.208987		15.86	0.18098			15.85	0.22354	0.184554
15.87	0.202664		15.87	0.179908			15.86	0.208987	0.18098
15.88	0.221158		15.88	0.182937			15.87	0.202664	0.179908
15.89	0.227228		15.89	0.174123			15.88	0.221158	0.182937
15.9	0.233906		15.9	0.179807			15.89	0.227228	0.174123
15.91	0.239116		15.91	0.171547			15.9	0.233906	0.179807
15.92	0.222963		15.92	0.170435			15.91	0.239116	0.171547
15.93	0.218027		15.93	0.18072			15.92	0.222963	0.170435
15.94	0.233954		15.94	0.180656			15.93	0.218027	0.18072
15.95	0.243322		15.95	0.180629			15.94	0.233954	0.180656
15.96	0.231876		15.96	0.183299			15.95	0.243322	0.180629
15.97	0.234646		15.97	0.180272			15.96	0.231876	0.183299
15.98	0.233205		15.98	0.172136			15.97	0.234646	0.180272
15.99	0.228962		15.99	0.171393			15.98	0.233205	0.172136
16	0.234753		16	0.170467			15.99	0.228962	0.171393
16.01	0.219624		16.01	0.165227			16	0.234753	0.170467
16.02	0.229265		16.02	0.168151			16.01	0.219624	0.165227
16.03	0.223144		16.03	0.165246			16.02	0.229265	0.168151
16.04	0.222437		16.04	0.171886			16.03	0.223144	0.165246
16.05	0.23071		16.05	0.180642			16.04	0.222437	0.171886
16.06	0.244013		16.06	0.188768			16.05	0.23071	0.180642
16.07	0.244598		16.07	0.187521			16.06	0.244013	0.188768
16.08	0.242945		16.08	0.186431			16.07	0.244598	0.187521
16.09	0.251931		16.09	0.180932			16.08	0.242945	0.186431
16.1	0.249388		16.1	0.175789			16.09	0.251931	0.180932
16.11	0.25311		16.11	0.179014			16.1	0.249388	0.175789
16.12	0.24062		16.12	0.181391			16.11	0.25311	0.179014
16.13	0.249906		16.13	0.183504			16.12	0.24062	0.181391
16.14	0.267626		16.14	0.174882			16.13	0.249906	0.183504
16.15	0.243164		16.15	0.162324			16.14	0.267626	0.174882
16.16	0.242823		16.16	0.176387			16.15	0.243164	0.162324
16.17	0.221509		16.17	0.171898			16.16	0.242823	0.176387
16.18	0.220573		16.18	0.186102			16.17	0.221509	0.171898
16.19	0.203581		16.19	0.17776			16.18	0.220573	0.186102
16.2	0.205468		16.2	0.17711			16.19	0.203581	0.17776
16.21	0.194377		16.21	0.176831			16.2	0.205468	0.17711
16.22	0.189101		16.22	0.181062			16.21	0.194377	0.176831
16.23	0.189488		16.23	0.169908			16.22	0.189101	0.181062
16.24	0.188357		16.24	0.174121			16.23	0.189488	0.169908
16.25	0.178674		16.25	0.17242			16.24	0.188357	0.174121
16.26	0.184611		16.26	0.165628			16.25	0.178674	0.17242
16.27	0.185805		16.27	0.167923			16.26	0.184611	0.165628
16.28	0.192085		16.28	0.166319			16.27	0.185805	0.167923
16.29	0.196421		16.29	0.175293			16.28	0.192085	0.166319
16.3	0.200268		16.3	0.180444			16.29	0.196421	0.175293
16.31	0.198635		16.31	0.174069			16.3	0.200268	0.180444
16.32	0.188638		16.32	0.171142			16.31	0.198635	0.174069
16.33	0.190227		16.33	0.173009			16.32	0.188638	0.171142
16.34	0.192579		16.34	0.171116			16.33	0.190227	0.173009
16.35	0.210716		16.35	0.169186			16.34	0.192579	0.171116
16.36	0.209992		16.36	0.175063			16.35	0.210716	0.169186
16.37	0.221293		16.37	0.175636			16.36	0.209992	0.175063
16.38	0.226743		16.38	0.167267			16.37	0.221293	0.175636
16.39	0.229339		16.39	0.179032			16.38	0.226743	0.167267
16.4	0.225424		16.4	0.20296			16.39	0.229339	0.179032
16.41	0.231994		16.41	0.195802			16.4	0.225424	0.20296
16.42	0.211504		16.42	0.183674			16.41	0.231994	0.195802
16.43	0.209442		16.43	0.175223			16.42	0.211504	0.183674
16.44	0.204777		16.44	0.168682			16.43	0.209442	0.175223
16.45	0.215111		16.45	0.165836			16.44	0.204777	0.168682
16.46	0.217299		16.46	0.171468			16.45	0.215111	0.165836
16.47	0.232133		16.47	0.167556			16.46	0.217299	0.171468
16.48	0.234625		16.48	0.173719			16.47	0.232133	0.167556
16.49	0.231097		16.49	0.180305			16.48	0.234625	0.173719
16.5	0.220927		16.5	0.179439			16.49	0.231097	0.180305
16.51	0.214156		16.51	0.173176			16.5	0.220927	0.179439
16.52	0.22537		16.52	0.167553			16.51	0.214156	0.173176
16.53	0.234177		16.53	0.181725			16.52	0.22537	0.167553
16.54	0.225678		16.54	0.168559			16.53	0.234177	0.181725
16.55	0.235766		16.55	0.174253			16.54	0.225678	0.168559
16.56	0.228907		16.56	0.170749			16.55	0.235766	0.174253
16.57	0.252261		16.57	0.169652			16.56	0.228907	0.170749
16.58	0.232994		16.58	0.168685			16.57	0.252261	0.169652
16.59	0.239861		16.59	0.173866			16.58	0.232994	0.168685
16.6	0.226552		16.6	0.174495			16.59	0.239861	0.173866
16.61	0.219212		16.61	0.178977			16.6	0.226552	0.174495
16.62	0.220509		16.62	0.165265			16.61	0.219212	0.178977
16.63	0.23043		16.63	0.163996			16.62	0.220509	0.165265
16.64	0.217084		16.64	0.163616			16.63	0.23043	0.163996
16.65	0.213854		16.65	0.165411			16.64	0.217084	0.163616
16.66	0.231761		16.66	0.168367			16.65	0.213854	0.165411
16.67	0.231677		16.67	0.16712			16.66	0.231761	0.168367
16.68	0.228368		16.68	0.169146			16.67	0.231677	0.16712
16.69	0.229351		16.69	0.187521			16.68	0.228368	0.169146
16.7	0.24251		16.7	0.171276			16.69	0.229351	0.187521
16.71	0.236749		16.71	0.176297			16.7	0.24251	0.171276
16.72	0.237507		16.72	0.177493			16.71	0.236749	0.176297
16.73	0.215818		16.73	0.188461			16.72	0.237507	0.177493
16.74	0.232113		16.74	0.194703			16.73	0.215818	0.188461
16.75	0.230469		16.75	0.200987			16.74	0.232113	0.194703
16.76	0.232805		16.76	0.214199			16.75	0.230469	0.200987
16.77	0.231573		16.77	0.205596			16.76	0.232805	0.214199
16.78	0.250619		16.78	0.1986			16.77	0.231573	0.205596
16.79	0.248174		16.79	0.197143			16.78	0.250619	0.1986
16.8	0.240214		16.8	0.200138			16.79	0.248174	0.197143
16.81	0.251787		16.81	0.188519			16.8	0.240214	0.200138
16.82	0.257668		16.82	0.1858			16.81	0.251787	0.188519
16.83	0.249953		16.83	0.204847			16.82	0.257668	0.1858
16.84	0.248646		16.84	0.206204			16.83	0.249953	0.204847
16.85	0.239614		16.85	0.200531			16.84	0.248646	0.206204
16.86	0.253353		16.86	0.20776			16.85	0.239614	0.200531
16.87	0.236373		16.87	0.200739			16.86	0.253353	0.20776
16.88	0.229359		16.88	0.201843			16.87	0.236373	0.200739
16.89	0.226598		16.89	0.206564			16.88	0.229359	0.201843
16.9	0.250767		16.9	0.204984			16.89	0.226598	0.206564
16.91	0.26012		16.91	0.196318			16.9	0.250767	0.204984
16.92	0.2365		16.92	0.185057			16.91	0.26012	0.196318
16.93	0.233235		16.93	0.19209			16.92	0.2365	0.185057
16.94	0.236776		16.94	0.187621			16.93	0.233235	0.19209
16.95	0.230196		16.95	0.185831			16.94	0.236776	0.187621
16.96	0.232711		16.96	0.191259			16.95	0.230196	0.185831
16.97	0.240203		16.97	0.184375			16.96	0.232711	0.191259
16.98	0.243442		16.98	0.192637			16.97	0.240203	0.184375
16.99	0.236142		16.99	0.194955			16.98	0.243442	0.192637
17	0.234409		17	0.203019			16.99	0.236142	0.194955
17.01	0.22418		17.01	0.195741			17	0.234409	0.203019
17.02	0.224666		17.02	0.20267			17.01	0.22418	0.195741
17.03	0.234004		17.03	0.196887			17.02	0.224666	0.20267
17.04	0.231531		17.04	0.20283			17.03	0.234004	0.196887
17.05	0.231692		17.05	0.205238			17.04	0.231531	0.20283
17.06	0.212672		17.06	0.204407			17.05	0.231692	0.205238
17.07	0.218663		17.07	0.199434			17.06	0.212672	0.204407
17.08	0.226927		17.08	0.205065			17.07	0.218663	0.199434
17.09	0.234457		17.09	0.19169			17.08	0.226927	0.205065
17.1	0.238666		17.1	0.180508			17.09	0.234457	0.19169
17.11	0.227775		17.11	0.175556			17.1	0.238666	0.180508
17.12	0.220061		17.12	0.184289			17.11	0.227775	0.175556
17.13	0.221208		17.13	0.18608			17.12	0.220061	0.184289
17.14	0.2233		17.14	0.1813			17.13	0.221208	0.18608
17.15	0.240065		17.15	0.181259			17.14	0.2233	0.1813
17.16	0.248103		17.16	0.182309			17.15	0.240065	0.181259
17.17	0.257273		17.17	0.177382			17.16	0.248103	0.182309
17.18	0.243101		17.18	0.186437			17.17	0.257273	0.177382
17.19	0.239092		17.19	0.195296			17.18	0.243101	0.186437
17.2	0.233205		17.2	0.192366			17.19	0.239092	0.195296
17.21	0.232835		17.21	0.180324			17.2	0.233205	0.192366
17.22	0.235205		17.22	0.180229			17.21	0.232835	0.180324
17.23	0.225485		17.23	0.184228			17.22	0.235205	0.180229
17.24	0.225371		17.24	0.19049			17.23	0.225485	0.184228
17.25	0.228731		17.25	0.193549			17.24	0.225371	0.19049
17.26	0.250642		17.26	0.191137			17.25	0.228731	0.193549
17.27	0.246575		17.27	0.190722			17.26	0.250642	0.191137
17.28	0.260253		17.28	0.201009			17.27	0.246575	0.190722
17.29	0.279118		17.29	0.19156			17.28	0.260253	0.201009
17.3	0.260201		17.3	0.191235			17.29	0.279118	0.19156
17.31	0.262526		17.31	0.201368			17.3	0.260201	0.191235
17.32	0.274106		17.32	0.197354			17.31	0.262526	0.201368
17.33	0.255781		17.33	0.202431			17.32	0.274106	0.197354
17.34	0.251198		17.34	0.217121			17.33	0.255781	0.202431
17.35	0.253998		17.35	0.208479			17.34	0.251198	0.217121
17.36	0.241913		17.36	0.196651			17.35	0.253998	0.208479
17.37	0.257059		17.37	0.194032			17.36	0.241913	0.196651
17.38	0.273687		17.38	0.206663			17.37	0.257059	0.194032
17.39	0.244946		17.39	0.227531			17.38	0.273687	0.206663
17.4	0.234318		17.4	0.229608			17.39	0.244946	0.227531
17.41	0.245108		17.41	0.215806			17.4	0.234318	0.229608
17.42	0.251385		17.42	0.217251			17.41	0.245108	0.215806
17.43	0.255964		17.43	0.212256			17.42	0.251385	0.217251
17.44	0.261738		17.44	0.205317			17.43	0.255964	0.212256
17.45	0.257191		17.45	0.202292			17.44	0.261738	0.205317
17.46	0.246852		17.46	0.197183			17.45	0.257191	0.202292
17.47	0.237744		17.47	0.200118			17.46	0.246852	0.197183
17.48	0.25344		17.48	0.186285			17.47	0.237744	0.200118
17.49	0.248922		17.49	0.197552			17.48	0.25344	0.186285
17.5	0.23112		17.5	0.201832			17.49	0.248922	0.197552
17.51	0.224792		17.51	0.205436			17.5	0.23112	0.201832
17.52	0.218113		17.52	0.217268			17.51	0.224792	0.205436
17.53	0.211242		17.53	0.211634			17.52	0.218113	0.217268
17.54	0.224808		17.54	0.219582			17.53	0.211242	0.211634
17.55	0.216439		17.55	0.225121			17.54	0.224808	0.219582
17.56	0.22822		17.56	0.211376			17.55	0.216439	0.225121
17.57	0.208338		17.57	0.196626			17.56	0.22822	0.211376
17.58	0.225575		17.58	0.188245			17.57	0.208338	0.196626
17.59	0.216037		17.59	0.175796			17.58	0.225575	0.188245
17.6	0.208608		17.6	0.184843			17.59	0.216037	0.175796
17.61	0.200576		17.61	0.177687			17.6	0.208608	0.184843
17.62	0.20531		17.62	0.173462			17.61	0.200576	0.177687
17.63	0.200539		17.63	0.173246			17.62	0.20531	0.173462
17.64	0.204394		17.64	0.179753			17.63	0.200539	0.173246
17.65	0.192402		17.65	0.185249			17.64	0.204394	0.179753
17.66	0.200914		17.66	0.195501			17.65	0.192402	0.185249
17.67	0.194833		17.67	0.187107			17.66	0.200914	0.195501
17.68	0.20292		17.68	0.172219			17.67	0.194833	0.187107
17.69	0.209557		17.69	0.178858			17.68	0.20292	0.172219
17.7	0.209426		17.7	0.186354			17.69	0.209557	0.178858
17.71	0.210044		17.71	0.197301			17.7	0.209426	0.186354
17.72	0.20385		17.72	0.200686			17.71	0.210044	0.197301
17.73	0.196088		17.73	0.215759			17.72	0.20385	0.200686
17.74	0.196815		17.74	0.198083			17.73	0.196088	0.215759
17.75	0.191964		17.75	0.195909			17.74	0.196815	0.198083
17.76	0.193554		17.76	0.183364			17.75	0.191964	0.195909
17.77	0.20089		17.77	0.182576			17.76	0.193554	0.183364
17.78	0.202035		17.78	0.165677			17.77	0.20089	0.182576
17.79	0.19405		17.79	0.174661			17.78	0.202035	0.165677
17.8	0.195311		17.8	0.18078			17.79	0.19405	0.174661
17.81	0.191338		17.81	0.170659			17.8	0.195311	0.18078
17.82	0.18676		17.82	0.173794			17.81	0.191338	0.170659
17.83	0.189195		17.83	0.172546			17.82	0.18676	0.173794
17.84	0.196531		17.84	0.174747			17.83	0.189195	0.172546
17.85	0.190147		17.85	0.17714			17.84	0.196531	0.174747
17.86	0.211707		17.86	0.172729			17.85	0.190147	0.17714
17.87	0.209989		17.87	0.18471			17.86	0.211707	0.172729
17.88	0.226308		17.88	0.179249			17.87	0.209989	0.18471
17.89	0.229959		17.89	0.182105			17.88	0.226308	0.179249
17.9	0.224527		17.9	0.179212			17.89	0.229959	0.182105
17.91	0.217287		17.91	0.175372			17.9	0.224527	0.179212
17.92	0.204962		17.92	0.173255			17.91	0.217287	0.175372
17.93	0.203469		17.93	0.173201			17.92	0.204962	0.173255
17.94	0.201978		17.94	0.178005			17.93	0.203469	0.173201
17.95	0.205664		17.95	0.183224			17.94	0.201978	0.178005
17.96	0.192682		17.96	0.182178			17.95	0.205664	0.183224
17.97	0.199372		17.97	0.176084			17.96	0.192682	0.182178
17.98	0.206724		17.98	0.175047			17.97	0.199372	0.176084
17.99	0.189682		17.99	0.179211			17.98	0.206724	0.175047
18	0.201399		18	0.174678			17.99	0.189682	0.179211
18.01	0.193575		18.01	0.169198			18	0.201399	0.174678
18.02	0.202074		18.02	0.174871			18.01	0.193575	0.169198
18.03	0.207355		18.03	0.172891			18.02	0.202074	0.174871
18.04	0.18888		18.04	0.170976			18.03	0.207355	0.172891
18.05	0.195334		18.05	0.177305			18.04	0.18888	0.170976
18.06	0.192158		18.06	0.177953			18.05	0.195334	0.177305
18.07	0.198912		18.07	0.165766			18.06	0.192158	0.177953
18.08	0.206198		18.08	0.167163			18.07	0.198912	0.165766
18.09	0.209813		18.09	0.166746			18.08	0.206198	0.167163
18.1	0.213275		18.1	0.173551			18.09	0.209813	0.166746
18.11	0.213243		18.11	0.178253			18.1	0.213275	0.173551
18.12	0.201347		18.12	0.174283			18.11	0.213243	0.178253
18.13	0.205386		18.13	0.173083			18.12	0.201347	0.174283
18.14	0.20534		18.14	0.171772			18.13	0.205386	0.173083
18.15	0.214196		18.15	0.169809			18.14	0.20534	0.171772
18.16	0.221602		18.16	0.170716			18.15	0.214196	0.169809
18.17	0.220206		18.17	0.17499			18.16	0.221602	0.170716
18.18	0.227198		18.18	0.177776			18.17	0.220206	0.17499
18.19	0.229003		18.19	0.175569			18.18	0.227198	0.177776
18.2	0.229829		18.2	0.183913			18.19	0.229003	0.175569
18.21	0.21536		18.21	0.186807			18.2	0.229829	0.183913
18.22	0.215795		18.22	0.190869			18.21	0.21536	0.186807
18.23	0.222272		18.23	0.181073			18.22	0.215795	0.190869
18.24	0.222805		18.24	0.1785			18.23	0.222272	0.181073
18.25	0.225464		18.25	0.18373			18.24	0.222805	0.1785
18.26	0.237481		18.26	0.198502			18.25	0.225464	0.18373
18.27	0.251812		18.27	0.188915			18.26	0.237481	0.198502
18.28	0.251123		18.28	0.186272			18.27	0.251812	0.188915
18.29	0.25435		18.29	0.185729			18.28	0.251123	0.186272
18.3	0.237637		18.3	0.175734			18.29	0.25435	0.185729
18.31	0.245193		18.31	0.178654			18.3	0.237637	0.175734
18.32	0.243924		18.32	0.180109			18.31	0.245193	0.178654
18.33	0.243696		18.33	0.176951			18.32	0.243924	0.180109
18.34	0.250903		18.34	0.181845			18.33	0.243696	0.176951
18.35	0.270859		18.35	0.176163			18.34	0.250903	0.181845
18.36	0.26577		18.36	0.174196			18.35	0.270859	0.176163
18.37	0.25256		18.37	0.186089			18.36	0.26577	0.174196
18.38	0.263667		18.38	0.192212			18.37	0.25256	0.186089
18.39	0.24709		18.39	0.180376			18.38	0.263667	0.192212
18.4	0.2401		18.4	0.17881			18.39	0.24709	0.180376
18.41	0.26782		18.41	0.188202			18.4	0.2401	0.17881
18.42	0.267985		18.42	0.188323			18.41	0.26782	0.188202
18.43	0.273896		18.43	0.187082			18.42	0.267985	0.188323
18.44	0.266721		18.44	0.193683			18.43	0.273896	0.187082
18.45	0.255487		18.45	0.190412			18.44	0.266721	0.193683
18.46	0.249987		18.46	0.198871			18.45	0.255487	0.190412
18.47	0.245599		18.47	0.187257			18.46	0.249987	0.198871
18.48	0.254231		18.48	0.178748			18.47	0.245599	0.187257
18.49	0.244407		18.49	0.176844			18.48	0.254231	0.178748
18.5	0.247531		18.5	0.180095			18.49	0.244407	0.176844
18.51	0.257377		18.51	0.176774			18.5	0.247531	0.180095
18.52	0.249157		18.52	0.182755			18.51	0.257377	0.176774
18.53	0.251426		18.53	0.183953			18.52	0.249157	0.182755
18.54	0.263487		18.54	0.181394			18.53	0.251426	0.183953
18.55	0.253233		18.55	0.182924			18.54	0.263487	0.181394
18.56	0.260876		18.56	0.184459			18.55	0.253233	0.182924
18.57	0.255494		18.57	0.187684			18.56	0.260876	0.184459
18.58	0.279389		18.58	0.188748			18.57	0.255494	0.187684
18.59	0.276224		18.59	0.180952			18.58	0.279389	0.188748
18.6	0.274457		18.6	0.181426			18.59	0.276224	0.180952
18.61	0.267617		18.61	0.186649			18.6	0.274457	0.181426
18.62	0.265203		18.62	0.180711			18.61	0.267617	0.186649
18.63	0.251713		18.63	0.177514			18.62	0.265203	0.180711
18.64	0.259399		18.64	0.179274			18.63	0.251713	0.177514
18.65	0.258353		18.65	0.182564			18.64	0.259399	0.179274
18.66	0.251146		18.66	0.167828			18.65	0.258353	0.182564
18.67	0.25359		18.67	0.169756			18.66	0.251146	0.167828
18.68	0.266528		18.68	0.163713			18.67	0.25359	0.169756
18.69	0.265544		18.69	0.162335			18.68	0.266528	0.163713
18.7	0.262792		18.7	0.171124			18.69	0.265544	0.162335
18.71	0.259034		18.71	0.170701			18.7	0.262792	0.171124
18.72	0.251068		18.72	0.177236			18.71	0.259034	0.170701
18.73	0.255889		18.73	0.176466			18.72	0.251068	0.177236
18.74	0.267954		18.74	0.176812			18.73	0.255889	0.176466
18.75	0.256691		18.75	0.187341			18.74	0.267954	0.176812
18.76	0.270338		18.76	0.180676			18.75	0.256691	0.187341
18.77	0.273033		18.77	0.186845			18.76	0.270338	0.180676
18.78	0.258733		18.78	0.180874			18.77	0.273033	0.186845
18.79	0.257498		18.79	0.170279			18.78	0.258733	0.180874
18.8	0.258954		18.8	0.169109			18.79	0.257498	0.170279
18.81	0.260497		18.81	0.178255			18.8	0.258954	0.169109
18.82	0.251464		18.82	0.172747			18.81	0.260497	0.178255
18.83	0.27616		18.83	0.167686			18.82	0.251464	0.172747
18.84	0.263299		18.84	0.170808			18.83	0.27616	0.167686
18.85	0.250362		18.85	0.164377			18.84	0.263299	0.170808
18.86	0.257166		18.86	0.162499			18.85	0.250362	0.164377
18.87	0.266691		18.87	0.174851			18.86	0.257166	0.162499
18.88	0.261374		18.88	0.171895			18.87	0.266691	0.174851
18.89	0.258061		18.89	0.173868			18.88	0.261374	0.171895
18.9	0.265839		18.9	0.178305			18.89	0.258061	0.173868
18.91	0.26691		18.91	0.175948			18.9	0.265839	0.178305
18.92	0.258398		18.92	0.17077			18.91	0.26691	0.175948
18.93	0.229907		18.93	0.181766			18.92	0.258398	0.17077
18.94	0.230439		18.94	0.180734			18.93	0.229907	0.181766
18.95	0.238881		18.95	0.169132			18.94	0.230439	0.180734
18.96	0.232723		18.96	0.170202			18.95	0.238881	0.169132
18.97	0.237665		18.97	0.176442			18.96	0.232723	0.170202
18.98	0.230574		18.98	0.17505			18.97	0.237665	0.176442
18.99	0.216601		18.99	0.183006			18.98	0.230574	0.17505
19	0.234573		19	0.17867			18.99	0.216601	0.183006
19.01	0.234062		19.01	0.188794			19	0.234573	0.17867
19.02	0.240411		19.02	0.187937			19.01	0.234062	0.188794
19.03	0.248127		19.03	0.206287			19.02	0.240411	0.187937
19.04	0.258766		19.04	0.197283			19.03	0.248127	0.206287
19.05	0.253239		19.05	0.187841			19.04	0.258766	0.197283
19.06	0.251748		19.06	0.194189			19.05	0.253239	0.187841
19.07	0.256053		19.07	0.201735			19.06	0.251748	0.194189
19.08	0.254933		19.08	0.208489			19.07	0.256053	0.201735
19.09	0.245987		19.09	0.196792			19.08	0.254933	0.208489
19.1	0.243363		19.1	0.194958			19.09	0.245987	0.196792
19.11	0.247228		19.11	0.205183			19.1	0.243363	0.194958
19.12	0.239188		19.12	0.199608			19.11	0.247228	0.205183
19.13	0.221478		19.13	0.195395			19.12	0.239188	0.199608
19.14	0.233312		19.14	0.192874			19.13	0.221478	0.195395
19.15	0.233026		19.15	0.185482			19.14	0.233312	0.192874
19.16	0.229411		19.16	0.193069			19.15	0.233026	0.185482
19.17	0.232481		19.17	0.197474			19.16	0.229411	0.193069
19.18	0.229057		19.18	0.199801			19.17	0.232481	0.197474
19.19	0.226755		19.19	0.194423			19.18	0.229057	0.199801
19.2	0.234159		19.2	0.197802			19.19	0.226755	0.194423
19.21	0.234041		19.21	0.201137			19.2	0.234159	0.197802
19.22	0.249518		19.22	0.202268			19.21	0.234041	0.201137
19.23	0.24334		19.23	0.200814			19.22	0.249518	0.202268
19.24	0.235528		19.24	0.198989			19.23	0.24334	0.200814
19.25	0.224393		19.25	0.196584			19.24	0.235528	0.198989
19.26	0.240593		19.26	0.197507			19.25	0.224393	0.196584
19.27	0.232885		19.27	0.208097			19.26	0.240593	0.197507
19.28	0.243833		19.28	0.208342			19.27	0.232885	0.208097
19.29	0.250716		19.29	0.209394			19.28	0.243833	0.208342
19.3	0.237568		19.3	0.200684			19.29	0.250716	0.209394
19.31	0.236062		19.31	0.200877			19.3	0.237568	0.200684
19.32	0.221653		19.32	0.213548			19.31	0.236062	0.200877
19.33	0.212185		19.33	0.213628			19.32	0.221653	0.213548
19.34	0.210982		19.34	0.20553			19.33	0.212185	0.213628
19.35	0.217007		19.35	0.208478			19.34	0.210982	0.20553
19.36	0.214342		19.36	0.202661			19.35	0.217007	0.208478
19.37	0.228886		19.37	0.200379			19.36	0.214342	0.202661
19.38	0.226612		19.38	0.197056			19.37	0.228886	0.200379
19.39	0.228639		19.39	0.194928			19.38	0.226612	0.197056
19.4	0.23565		19.4	0.185589			19.39	0.228639	0.194928
19.41	0.227773		19.41	0.184776			19.4	0.23565	0.185589
19.42	0.249831		19.42	0.187913			19.41	0.227773	0.184776
19.43	0.239549		19.43	0.184833			19.42	0.249831	0.187913
19.44	0.217917		19.44	0.179587			19.43	0.239549	0.184833
19.45	0.218031		19.45	0.188917			19.44	0.217917	0.179587
19.46	0.233166		19.46	0.183757			19.45	0.218031	0.188917
19.47	0.220381		19.47	0.186054			19.46	0.233166	0.183757
19.48	0.232646		19.48	0.187741			19.47	0.220381	0.186054
19.49	0.22884		19.49	0.184616			19.48	0.232646	0.187741
19.5	0.223542		19.5	0.181241			19.49	0.22884	0.184616
19.51	0.234555		19.51	0.174988			19.5	0.223542	0.181241
19.52	0.246609		19.52	0.172593			19.51	0.234555	0.174988
19.53	0.251665		19.53	0.168929			19.52	0.246609	0.172593
19.54	0.243784		19.54	0.170686			19.53	0.251665	0.168929
19.55	0.239118		19.55	0.17026			19.54	0.243784	0.170686
19.56	0.239694		19.56	0.169523			19.55	0.239118	0.17026
19.57	0.233704		19.57	0.167985			19.56	0.239694	0.169523
19.58	0.22244		19.58	0.162806			19.57	0.233704	0.167985
19.59	0.215019		19.59	0.159211			19.58	0.22244	0.162806
19.6	0.214015		19.6	0.168909			19.59	0.215019	0.159211
19.61	0.214998		19.61	0.169628			19.6	0.214015	0.168909
19.62	0.237016		19.62	0.16625			19.61	0.214998	0.169628
19.63	0.241713		19.63	0.15965			19.62	0.237016	0.16625
19.64	0.233928		19.64	0.163099			19.63	0.241713	0.15965
19.65	0.240152		19.65	0.159638			19.64	0.233928	0.163099
19.66	0.229461		19.66	0.164893			19.65	0.240152	0.159638
19.67	0.227355		19.67	0.16387			19.66	0.229461	0.164893
19.68	0.230224		19.68	0.167793			19.67	0.227355	0.16387
19.69	0.237058		19.69	0.16553			19.68	0.230224	0.167793
19.7	0.23966		19.7	0.165522			19.69	0.237058	0.16553
19.71	0.238804		19.71	0.167811			19.7	0.23966	0.165522
19.72	0.223577		19.72	0.168186			19.71	0.238804	0.167811
19.73	0.212781		19.73	0.177477			19.72	0.223577	0.168186
19.74	0.212024		19.74	0.170548			19.73	0.212781	0.177477
19.75	0.213858		19.75	0.175448			19.74	0.212024	0.170548
19.76	0.219243		19.76	0.183009			19.75	0.213858	0.175448
19.77	0.205547		19.77	0.172777			19.76	0.219243	0.183009
19.78	0.202727		19.78	0.169096			19.77	0.205547	0.172777
19.79	0.221817		19.79	0.163879			19.78	0.202727	0.169096
19.8	0.219031		19.8	0.162925			19.79	0.221817	0.163879
19.81	0.243926		19.81	0.16585			19.8	0.219031	0.162925
19.82	0.228621		19.82	0.183691			19.81	0.243926	0.16585
19.83	0.227418		19.83	0.182928			19.82	0.228621	0.183691
19.84	0.234945		19.84	0.178836			19.83	0.227418	0.182928
19.85	0.236474		19.85	0.184526			19.84	0.234945	0.178836
19.86	0.233549		19.86	0.180415			19.85	0.236474	0.184526
19.87	0.236717		19.87	0.175373			19.86	0.233549	0.180415
19.88	0.221845		19.88	0.181271			19.87	0.236717	0.175373
19.89	0.210034		19.89	0.188623			19.88	0.221845	0.181271
19.9	0.206247		19.9	0.182			19.89	0.210034	0.188623
19.91	0.21128		19.91	0.181038			19.9	0.206247	0.182
19.92	0.217033		19.92	0.180753			19.91	0.21128	0.181038
19.93	0.234216		19.93	0.180141			19.92	0.217033	0.180753
19.94	0.225886		19.94	0.1705			19.93	0.234216	0.180141
19.95	0.221502		19.95	0.180624			19.94	0.225886	0.1705
19.96	0.214054		19.96	0.17681			19.95	0.221502	0.180624
19.97	0.204423		19.97	0.169221			19.96	0.214054	0.17681
19.98	0.206789		19.98	0.178317			19.97	0.204423	0.169221
19.99	0.211589		19.99	0.177059			19.98	0.206789	0.178317
[truncated: 8,003 more rows]

## Sheet: rg
0	3.18594	2.63719	2.67226	2.49092		0	3.18271	2.63374	2.67057	2.48811				Time (ns)	Docetaxel	Neohespridin
10	3.20264	2.65706	2.67813	2.50629		10	3.20616	2.65505	2.68999	2.5047				0	3.18594	3.18271
20	3.21475	2.672	2.69032	2.50835		20	3.19002	2.65166	2.67602	2.48197				10	3.20264	3.20616
30	3.20292	2.65377	2.69152	2.49612		30	3.18957	2.64452	2.67468	2.48985				20	3.21475	3.19002
40	3.20452	2.65892	2.69761	2.48817		40	3.18547	2.63877	2.66699	2.49367				30	3.20292	3.18957
50	3.1934	2.65808	2.68038	2.47906		50	3.18785	2.63383	2.67536	2.49603				40	3.20452	3.18547
60	3.192	2.6549	2.68245	2.47663		60	3.1915	2.64065	2.68071	2.49242				50	3.1934	3.18785
70	3.18977	2.65561	2.68006	2.47271		70	3.19123	2.6504	2.68203	2.47991				60	3.192	3.1915
80	3.19543	2.65724	2.68118	2.48433		80	3.18979	2.65667	2.67291	2.47936				70	3.18977	3.19123
90	3.18883	2.65777	2.67353	2.47504		90	3.18845	2.66088	2.67108	2.47335				80	3.19543	3.18979
100	3.19116	2.66872	2.66825	2.47494		100	3.19045	2.66822	2.67234	2.46924				90	3.18883	3.18845
110	3.19452	2.67628	2.67534	2.46779		110	3.18942	2.65809	2.67292	2.47688				100	3.19116	3.19045
120	3.1707	2.66314	2.65532	2.44204		120	3.18844	2.66271	2.66863	2.47401				110	3.19452	3.18942
130	3.18131	2.65942	2.65971	2.46878		130	3.18845	2.65906	2.66062	2.48656				120	3.1707	3.18844
140	3.19271	2.66653	2.66322	2.4867		140	3.19016	2.6677	2.66126	2.48099				130	3.18131	3.18845
150	3.19106	2.65934	2.66457	2.4887		150	3.18611	2.66244	2.66698	2.47005				140	3.19271	3.19016
160	3.19436	2.6573	2.67791	2.48505		160	3.17891	2.65494	2.65672	2.47064				150	3.19106	3.18611
170	3.19456	2.65203	2.68304	2.48565		170	3.19123	2.66151	2.66854	2.48257				160	3.19436	3.17891
180	3.18389	2.6533	2.67383	2.46678		180	3.18239	2.64803	2.66061	2.48281				170	3.19456	3.19123
190	3.19047	2.66267	2.6754	2.47196		190	3.1752	2.64103	2.65842	2.47419				180	3.18389	3.18239
200	3.18627	2.64799	2.68202	2.46973		200	3.18765	2.64535	2.67239	2.4865				190	3.19047	3.1752
210	3.17864	2.64358	2.67449	2.46294		210	3.18598	2.63622	2.67857	2.48525				200	3.18627	3.18765
220	3.17602	2.64896	2.66925	2.45608		220	3.18681	2.64646	2.676	2.47927				210	3.17864	3.18598
230	3.17588	2.64899	2.66688	2.45825		230	3.181	2.65268	2.66401	2.47059				220	3.17602	3.18681
240	3.17974	2.6586	2.67207	2.45222		240	3.19336	2.65461	2.68006	2.48301				230	3.17588	3.181
250	3.18019	2.66693	2.66472	2.45235		250	3.19307	2.6642	2.67345	2.47912				240	3.17974	3.19336
260	3.18309	2.67653	2.66014	2.45438		260	3.18379	2.66159	2.65976	2.47277				250	3.18019	3.19307
270	3.1793	2.674	2.65586	2.45195		270	3.18645	2.67148	2.66245	2.46606				260	3.18309	3.18379
280	3.17237	2.65852	2.64879	2.45846		280	3.18221	2.66633	2.67005	2.45243				270	3.1793	3.18645
290	3.17502	2.66245	2.65312	2.45639		290	3.18854	2.67783	2.67794	2.44775				280	3.17237	3.18221
300	3.18335	2.671	2.66368	2.45722		300	3.19157	2.68485	2.67878	2.44704				290	3.17502	3.18854
310	3.1817	2.66307	2.67235	2.45216		310	3.18359	2.69453	2.66324	2.43251				300	3.18335	3.19157
320	3.18315	2.65511	2.68616	2.44945		320	3.1859	2.69912	2.66074	2.4362				310	3.1817	3.18359
330	3.18409	2.65504	2.67895	2.45985		330	3.18526	2.69618	2.66636	2.43163				320	3.18315	3.1859
340	3.18428	2.65488	2.68543	2.45342		340	3.17693	2.68713	2.65967	2.42719				330	3.18409	3.18526
350	3.18914	2.65002	2.68745	2.46904		350	3.18246	2.68892	2.6725	2.42561				340	3.18428	3.17693
360	3.18023	2.64826	2.67683	2.45948		360	3.17857	2.68379	2.67427	2.41913				350	3.18914	3.18246
370	3.17659	2.64249	2.67728	2.45577		370	3.17015	2.6813	2.65763	2.41812				360	3.18023	3.17857
380	3.18166	2.63707	2.68757	2.46347		380	3.16785	2.6891	2.65104	2.41065				370	3.17659	3.17015
390	3.18299	2.63001	2.69229	2.46932		390	3.17437	2.68879	2.66971	2.40755				380	3.18166	3.16785
400	3.17851	2.61727	2.68895	2.47494		400	3.16235	2.68303	2.65923	2.3939				390	3.18299	3.17437
410	3.1795	2.61888	2.68866	2.47608		410	3.16389	2.68272	2.65367	2.40447				400	3.17851	3.16235
420	3.17792	2.61288	2.68947	2.4775		420	3.1517	2.6842	2.6446	2.38068				410	3.1795	3.16389
430	3.17888	2.6086	2.69824	2.47492		430	3.14761	2.6851	2.63748	2.37673				420	3.17792	3.1517
440	3.18266	2.59631	2.69887	2.49677		440	3.15934	2.70031	2.6371	2.39099				430	3.17888	3.14761
450	3.18552	2.59544	2.70859	2.49446		450	3.15635	2.69861	2.62615	2.39705				440	3.18266	3.15934
460	3.1788	2.59909	2.69893	2.48395		460	3.16342	2.7087	2.63493	2.39469				450	3.18552	3.15635
470	3.17784	2.60394	2.70685	2.46774		470	3.16714	2.70688	2.64731	2.39291				460	3.1788	3.16342
480	3.18964	2.61133	2.70803	2.489		480	3.17274	2.71725	2.65564	2.38679				470	3.17784	3.16714
490	3.18645	2.61219	2.70191	2.48659		490	3.16329	2.7055	2.65139	2.37975				480	3.18964	3.17274
500	3.18952	2.60745	2.71301	2.48734		500	3.17499	2.72439	2.66342	2.37593				490	3.18645	3.16329
510	3.19791	2.63001	2.70705	2.49162		510	3.16547	2.71189	2.6537	2.37569				500	3.18952	3.17499
520	3.20056	2.62965	2.70158	2.50472		520	3.16557	2.71601	2.65154	2.37367				510	3.19791	3.16547
530	3.19536	2.62844	2.6951	2.49969		530	3.17571	2.71443	2.66545	2.38693				520	3.20056	3.16557
540	3.19802	2.62747	2.69743	2.50498		540	3.17319	2.71341	2.65392	2.39424				530	3.19536	3.17571
550	3.19354	2.62602	2.68624	2.5071		550	3.17296	2.70593	2.65972	2.39565				540	3.19802	3.17319
560	3.19911	2.61891	2.69289	2.52156		560	3.16852	2.69669	2.66345	2.39017				550	3.19354	3.17296
570	3.19866	2.61998	2.69266	2.51954		570	3.17048	2.70071	2.6581	2.39678				560	3.19911	3.16852
580	3.20193	2.62982	2.70307	2.50642		580	3.17773	2.70663	2.66724	2.39915				570	3.19866	3.17048
590	3.21112	2.6316	2.70832	2.52236		590	3.17791	2.69792	2.66822	2.40833				580	3.20193	3.17773
600	3.2017	2.62141	2.70355	2.51413		600	3.1717	2.69029	2.66361	2.40559				590	3.21112	3.17791
610	3.1987	2.61756	2.70668	2.5071		610	3.18079	2.69677	2.67102	2.4141				600	3.2017	3.1717
620	3.1922	2.60406	2.70638	2.50493		620	3.18942	2.69402	2.69121	2.41751				610	3.1987	3.18079
630	3.18981	2.60794	2.69441	2.5077		630	3.19284	2.69956	2.69767	2.41316				620	3.1922	3.18942
640	3.18913	2.61768	2.69189	2.49851		640	3.18355	2.69282	2.6894	2.40539				630	3.18981	3.19284
650	3.18839	2.61963	2.68209	2.50512		650	3.18126	2.69493	2.68493	2.40194				640	3.18913	3.18355
660	3.19616	2.62725	2.68683	2.51184		660	3.18819	2.69829	2.69764	2.40232				650	3.18839	3.18126
670	3.18725	2.61653	2.67969	2.50801		670	3.19016	2.6949	2.70157	2.40693				660	3.19616	3.18819
680	3.18475	2.6005	2.68609	2.5115		680	3.1912	2.69049	2.70172	2.41444				670	3.18725	3.19016
690	3.18969	2.59906	2.68801	2.52344		690	3.19473	2.69121	2.70067	2.42413				680	3.18475	3.1912
700	3.18103	2.58478	2.68123	2.52347		700	3.18686	2.67744	2.701	2.41828				690	3.18969	3.19473
710	3.18178	2.58252	2.67905	2.52997		710	3.19189	2.67991	2.70286	2.42672				700	3.18103	3.18686
720	3.17963	2.56797	2.68764	2.53027		720	3.19914	2.6848	2.70498	2.43801				710	3.18178	3.19189
730	3.18756	2.57348	2.69005	2.54203		730	3.20409	2.6888	2.70369	2.44802				720	3.17963	3.19914
740	3.19401	2.57738	2.70313	2.54039		740	3.19523	2.67596	2.69512	2.44837				730	3.18756	3.20409
750	3.18256	2.56822	2.69632	2.52814		750	3.20382	2.68517	2.70889	2.44555				740	3.19401	3.19523
760	3.18492	2.5708	2.69704	2.53068		760	3.20468	2.68884	2.70939	2.44322				750	3.18256	3.20382
770	3.19827	2.58591	2.71222	2.53273		770	3.19932	2.70172	2.70027	2.42497				760	3.18492	3.20468
780	3.1987	2.59227	2.71319	2.52629		780	3.19287	2.69735	2.69404	2.41977				770	3.19827	3.19932
790	3.20618	2.58361	2.7226	2.54394		790	3.18685	2.70007	2.67295	2.42424				780	3.1987	3.19287
800	3.19939	2.58208	2.71761	2.53371		800	3.18832	2.69494	2.68191	2.42394				790	3.20618	3.18685
810	3.20533	2.59778	2.7206	2.52946		810	3.19187	2.6956	2.68485	2.42928				800	3.19939	3.18832
820	3.19059	2.58419	2.71307	2.51414		820	3.18531	2.69292	2.68144	2.41877				810	3.20533	3.19187
830	3.20335	2.59598	2.71828	2.52878		830	3.18251	2.68492	2.6829	2.41867				820	3.19059	3.18531
840	3.19509	2.5868	2.7033	2.53335		840	3.18947	2.69463	2.68966	2.41872				830	3.20335	3.18251
850	3.18928	2.58817	2.69959	2.52122		850	3.18905	2.70607	2.69079	2.40352				840	3.19509	3.18947
860	3.18543	2.58309	2.69848	2.51789		860	3.19155	2.70665	2.68835	2.41222				850	3.18928	3.18905
870	3.18882	2.57784	2.70435	2.52553		870	3.18453	2.69381	2.68356	2.41338				860	3.18543	3.19155
880	3.20142	2.59629	2.71731	2.52462		880	3.18692	2.69709	2.67866	2.42145				870	3.18882	3.18453
890	3.19185	2.59132	2.70833	2.51511		890	3.1826	2.69934	2.67131	2.4157				880	3.20142	3.18692
900	3.18992	2.58775	2.70943	2.51272		900	3.18697	2.7072	2.67309	2.41645				890	3.19185	3.1826
910	3.19643	2.58901	2.70868	2.52873		910	3.18748	2.71204	2.67001	2.41578				900	3.18992	3.18697
920	3.18372	2.58516	2.69953	2.5103		920	3.1861	2.70548	2.67864	2.40992				910	3.19643	3.18748
930	3.19246	2.59814	2.70733	2.5107		930	3.19291	2.71554	2.68063	2.41441				920	3.18372	3.1861
940	3.1873	2.59635	2.7022	2.50495		940	3.19031	2.70706	2.67674	2.42138				930	3.19246	3.19291
950	3.19623	2.60481	2.71227	2.50803		950	3.17626	2.69506	2.66704	2.4085				940	3.1873	3.19031
960	3.20346	2.61306	2.71163	2.5186		960	3.17898	2.7003	2.66396	2.4132				950	3.19623	3.17626
970	3.19602	2.61504	2.69792	2.51234		970	3.17525	2.70683	2.66404	2.39591				960	3.20346	3.17898
980	3.20327	2.60725	2.71574	2.51971		980	3.1794	2.71283	2.66638	2.39754				970	3.19602	3.17525
990	3.19598	2.5909	2.70842	2.52592		990	3.17108	2.70838	2.66252	2.38479				980	3.20327	3.1794
1000	3.19339	2.59035	2.7108	2.51737		1000	3.17523	2.7229	2.66572	2.3757				990	3.19598	3.17108
1010	3.20388	2.60049	2.71196	2.53227		1010	3.1694	2.71517	2.66227	2.37285				1000	3.19339	3.17523
1020	3.19587	2.59781	2.69938	2.52822		1020	3.17471	2.71891	2.66392	2.38088				1010	3.20388	3.1694
1030	3.19266	2.5943	2.69823	2.52493		1030	3.17858	2.71361	2.67284	2.38726				1020	3.19587	3.17471
1040	3.20524	2.59957	2.71232	2.53627		1040	3.17897	2.71553	2.66601	2.39374				1030	3.19266	3.17858
1050	3.19053	2.59619	2.69556	2.52045		1050	3.1801	2.71698	2.6687	2.39211				1040	3.20524	3.17897
1060	3.19009	2.59595	2.70016	2.51466		1060	3.18544	2.72111	2.67658	2.39282				1050	3.19053	3.1801
1070	3.18956	2.59148	2.70234	2.51559		1070	3.19285	2.72238	2.68926	2.3969				1060	3.19009	3.18544
1080	3.20175	2.59255	2.71008	2.53703		1080	3.19949	2.73557	2.69162	2.39695				1070	3.18956	3.19285
1090	3.19624	2.59742	2.70493	2.52362		1090	3.18665	2.72231	2.67975	2.39113				1080	3.20175	3.19949
1100	3.19735	2.60346	2.71109	2.51356		1100	3.19158	2.72332	2.69511	2.38584				1090	3.19624	3.18665
1110	3.19906	2.60292	2.71779	2.51125		1110	3.19496	2.72756	2.70347	2.3806				1100	3.19735	3.19158
1120	3.19783	2.59761	2.72353	2.50741		1120	3.18201	2.70173	2.69866	2.38083				1110	3.19906	3.19496
1130	3.18847	2.59537	2.70666	2.50413		1130	3.18772	2.70607	2.70342	2.38576				1120	3.19783	3.18201
1140	3.19342	2.60375	2.7131	2.50109		1140	3.18497	2.70148	2.69886	2.38877				1130	3.18847	3.18772
1150	3.19499	2.60267	2.71579	2.5033		1150	3.19694	2.70831	2.70645	2.40438				1140	3.19342	3.18497
1160	3.20047	2.59674	2.72276	2.51586		1160	3.19441	2.70302	2.70963	2.40002				1150	3.19499	3.19694
1170	3.18714	2.59704	2.70223	2.5038		1170	3.19531	2.71354	2.70685	2.39368				1160	3.20047	3.19441
1180	3.19926	2.61598	2.70518	2.51182		1180	3.20221	2.72173	2.71145	2.39761				1170	3.18714	3.19531
1190	3.20754	2.62546	2.71254	2.5151		1190	3.19469	2.71057	2.7027	2.40007				1180	3.19926	3.20221
1200	3.20076	2.61404	2.70875	2.51379		1200	3.18713	2.70099	2.69245	2.40229				1190	3.20754	3.19469
1210	3.20831	2.62233	2.71933	2.51298		1210	3.19901	2.70609	2.70449	2.41455				1200	3.20076	3.18713
1220	3.19589	2.60417	2.70749	2.513		1220	3.19092	2.68841	2.69843	2.4197				1210	3.20831	3.19901
1230	3.19245	2.59682	2.70343	2.51624		1230	3.19654	2.68958	2.70659	2.4241				1220	3.19589	3.19092
1240	3.18748	2.58629	2.69991	2.51826		1240	3.20041	2.68914	2.7132	2.42742				1230	3.19245	3.19654
1250	3.19043	2.5827	2.70559	2.52333		1250	3.20053	2.68386	2.71183	2.43508				1240	3.18748	3.20041
1260	3.19187	2.58716	2.70838	2.51938		1260	3.21045	2.69005	2.72348	2.44139				1250	3.19043	3.20053
1270	3.19249	2.59392	2.70836	2.51403		1270	3.19826	2.67899	2.72366	2.42124				1260	3.19187	3.21045
1280	3.20689	2.60561	2.71681	2.52944		1280	3.18634	2.67987	2.71039	2.40367				1270	3.19249	3.19826
1290	3.20478	2.60699	2.71264	2.52713		1290	3.19827	2.68121	2.7296	2.41211				1280	3.20689	3.18634
1300	3.2039	2.60732	2.71404	2.52307		1300	3.20009	2.67541	2.73809	2.41375				1290	3.20478	3.19827
1310	3.21689	2.61094	2.72271	2.54294		1310	3.19896	2.66508	2.7345	2.42623				1300	3.2039	3.20009
1320	3.20264	2.611	2.70766	2.5229		1320	3.20874	2.66769	2.74731	2.4347				1310	3.21689	3.19896
1330	3.22289	2.63038	2.72998	2.5303		1330	3.2119	2.67765	2.74511	2.43458				1320	3.20264	3.20874
1340	3.20745	2.61656	2.72609	2.50948		1340	3.21055	2.68099	2.73714	2.43633				1330	3.22289	3.2119
1350	3.21091	2.61693	2.73092	2.51269		1350	3.20521	2.67995	2.7331	2.42792				1340	3.20745	3.21055
1360	3.21049	2.60455	2.72433	2.53157		1360	3.21134	2.6889	2.72966	2.43806				1350	3.21091	3.20521
1370	3.21031	2.58614	2.72441	2.54983		1370	3.21065	2.68502	2.73702	2.43227				1360	3.21049	3.21134
1380	3.20364	2.56958	2.72554	2.5486		1380	3.20372	2.68765	2.73288	2.4157				1370	3.21031	3.21065
1390	3.20451	2.56183	2.72868	2.55522		1390	3.18613	2.66382	2.72078	2.40921				1380	3.20364	3.20372
1400	3.20403	2.5489	2.7336	2.56165		1400	3.20484	2.68606	2.72917	2.4246				1390	3.20451	3.18613
1410	3.21634	2.56593	2.7429	2.56557		1410	3.20203	2.67291	2.7228	2.43883				1400	3.20403	3.20484
1420	3.20839	2.5556	2.73108	2.5686		1420	3.19556	2.67117	2.72034	2.42648				1410	3.21634	3.20203
1430	3.20455	2.55291	2.73068	2.5621		1430	3.19652	2.67647	2.72139	2.422				1420	3.20839	3.19556
1440	3.19559	2.54272	2.71939	2.56185		1440	3.19416	2.67781	2.71244	2.42432				1430	3.20455	3.19652
1450	3.20028	2.55007	2.72306	2.56235		1450	3.19484	2.67844	2.71367	2.42403				1440	3.19559	3.19416
1460	3.19895	2.55457	2.71358	2.56461		1460	3.19549	2.67867	2.71322	2.42601				1450	3.20028	3.19484
1470	3.19764	2.56115	2.70816	2.5605		1470	3.19153	2.67124	2.70985	2.42755				1460	3.19895	3.19549
1480	3.20237	2.55885	2.71321	2.56926		1480	3.19706	2.67762	2.7158	2.4284				1470	3.19764	3.19153
1490	3.19822	2.55684	2.70524	2.56934		1490	3.19877	2.68675	2.709	2.43042				1480	3.20237	3.19706
1500	3.20193	2.55998	2.71081	2.56957		1500	3.20712	2.68784	2.71294	2.44678				1490	3.19822	3.19877
1510	3.20224	2.556	2.7149	2.56998		1510	3.1891	2.67773	2.69098	2.43498				1500	3.20193	3.20712
1520	3.20091	2.55699	2.71173	2.56904		1520	3.18861	2.68082	2.69782	2.4227				1510	3.20224	3.1891
1530	3.19872	2.55705	2.71229	2.56293		1530	3.20662	2.69617	2.71356	2.43559				1520	3.20091	3.18861
1540	3.19532	2.54339	2.71601	2.5641		1540	3.19884	2.69466	2.71122	2.41934				1530	3.19872	3.20662
1550	3.20484	2.55738	2.71951	2.57022		1550	3.20232	2.68996	2.72104	2.42277				1540	3.19532	3.19884
1560	3.20826	2.54206	2.72338	2.58978		1560	3.20054	2.69301	2.72825	2.4065				1550	3.20484	3.20232
1570	3.2049	2.52537	2.72605	2.59498		1570	3.20733	2.69753	2.73568	2.41109				1560	3.20826	3.20054
1580	3.21561	2.52175	2.73971	2.61056		1580	3.20491	2.68801	2.72827	2.42363				1570	3.2049	3.20733
1590	3.20792	2.5198	2.72927	2.60445		1590	3.1955	2.674	2.72729	2.41538				1580	3.21561	3.20491
1600	3.20607	2.51647	2.72975	2.60262		1600	3.19655	2.67986	2.72682	2.4122				1590	3.20792	3.1955
1610	3.21427	2.52197	2.73229	2.61483		1610	3.20511	2.6994	2.72462	2.4156				1600	3.20607	3.19655
1620	3.20985	2.52355	2.72587	2.60913		1620	3.19614	2.6868	2.72659	2.40363				1610	3.21427	3.20511
1630	3.2117	2.53527	2.72162	2.60676		1630	3.20897	2.7017	2.73243	2.41446				1620	3.20985	3.19614
1640	3.21406	2.53239	2.72966	2.60697		1640	3.20623	2.70749	2.72057	2.41408				1630	3.2117	3.20897
1650	3.21683	2.53871	2.72838	2.609		1650	3.19411	2.7019	2.71305	2.39662				1640	3.21406	3.20623
1660	3.21763	2.54439	2.73645	2.59696		1660	3.18817	2.69622	2.71152	2.38892				1650	3.21683	3.19411
1670	3.2177	2.54377	2.74159	2.59231		1670	3.2022	2.70134	2.72135	2.40939				1660	3.21763	3.18817
1680	3.22059	2.54723	2.7277	2.61069		1680	3.20488	2.69839	2.7294	2.41074				1670	3.2177	3.2022
1690	3.20851	2.53724	2.72745	2.59085		1690	3.20189	2.69337	2.71716	2.42219				1680	3.22059	3.20488
1700	3.20022	2.54108	2.7172	2.57732		1700	3.20406	2.6885	2.72225	2.4276				1690	3.20851	3.20189
1710	3.21227	2.53835	2.72877	2.59769		1710	3.1989	2.69394	2.70382	2.42856				1700	3.20022	3.20406
1720	3.20916	2.53447	2.73221	2.59016		1720	3.19553	2.68956	2.69766	2.43139				1710	3.21227	3.1989
1730	3.20222	2.53063	2.73019	2.57885		1730	3.19051	2.68483	2.69006	2.43187				1720	3.20916	3.19553
1740	3.19148	2.5346	2.71563	2.56365		1740	3.19	2.68138	2.69759	2.42598				1730	3.20222	3.19051
1750	3.21099	2.53749	2.74223	2.58115		1750	3.19026	2.67388	2.69769	2.43483				1740	3.19148	3.19
1760	3.20262	2.53271	2.73857	2.56889		1760	3.18121	2.65937	2.695	2.43001				1750	3.21099	3.19026
1770	3.19549	2.53336	2.72917	2.56049		1770	3.18768	2.66309	2.69836	2.43914				1760	3.20262	3.18121
1780	3.20727	2.54331	2.74478	2.56339		1780	3.19386	2.68541	2.70321	2.42543				1770	3.19549	3.18768
1790	3.19646	2.53549	2.73545	2.55409		1790	3.19875	2.69609	2.71071	2.41809				1780	3.20727	3.19386
1800	3.19464	2.53522	2.73817	2.54688		1800	3.18967	2.68543	2.70197	2.41574				1790	3.19646	3.19875
1810	3.18839	2.53304	2.73145	2.54058		1810	3.18445	2.6696	2.69408	2.4283				1800	3.19464	3.18967
1820	3.19592	2.54432	2.74006	2.53895		1820	3.19176	2.67079	2.70191	2.43746				1810	3.18839	3.18445
1830	3.17844	2.53116	2.71826	2.53166		1830	3.18701	2.67214	2.71397	2.41001				1820	3.19592	3.19176
1840	3.19361	2.52886	2.73922	2.54948		1840	3.19105	2.67559	2.71355	2.41734				1830	3.17844	3.18701
1850	3.18989	2.53799	2.72999	2.54098		1850	3.19352	2.67151	2.72007	2.42104				1840	3.19361	3.19105
1860	3.19353	2.53959	2.7347	2.54344		1860	3.19227	2.66178	2.7226	2.42559				1850	3.18989	3.19352
1870	3.19648	2.53699	2.73428	2.5539		1870	3.18945	2.65915	2.72183	2.42194				1860	3.19353	3.19227
1880	3.19136	2.5277	2.7346	2.54995		1880	3.19021	2.66864	2.7267	2.40798				1870	3.19648	3.18945
1890	3.1975	2.52125	2.73943	2.56649		1890	3.18426	2.67243	2.71196	2.40467				1880	3.19136	3.19021
1900	3.19632	2.52811	2.73198	2.56472		1900	3.17948	2.67104	2.70116	2.4057				1890	3.1975	3.18426
1910	3.19027	2.52692	2.72576	2.55746		1910	3.18819	2.67455	2.72343	2.39977				1900	3.19632	3.17948
1920	3.18515	2.52353	2.72175	2.55229		1920	3.19089	2.67198	2.72255	2.41076				1910	3.19027	3.18819
1930	3.19225	2.52903	2.72999	2.5558		1930	3.19206	2.67509	2.72863	2.40354				1920	3.18515	3.19089
1940	3.19926	2.52615	2.73275	2.57316		1940	3.18452	2.66191	2.71922	2.40882				1930	3.19225	3.19206
1950	3.20273	2.5282	2.73783	2.57439		1950	3.19206	2.67237	2.71929	2.41709				1940	3.19926	3.18452
1960	3.18682	2.52083	2.7229	2.55791		1960	3.19044	2.66782	2.71482	2.42287				1950	3.20273	3.19206
1970	3.20386	2.5398	2.74401	2.55917		1970	3.18169	2.65442	2.70795	2.42227				1960	3.18682	3.19044
1980	3.20482	2.54143	2.74651	2.55726		1980	3.18486	2.64783	2.71618	2.4286				1970	3.20386	3.18169
1990	3.19525	2.53227	2.73905	2.55038		1990	3.19854	2.65913	2.72531	2.44194				1980	3.20482	3.18486
2000	3.18906	2.53671	2.73413	2.53572		2000	3.20381	2.66911	2.72195	2.44859				1990	3.19525	3.19854
2010	3.18502	2.52932	2.73039	2.53697		2010	3.19115	2.66409	2.70716	2.43738				2000	3.18906	3.20381
2020	3.1795	2.52834	2.73073	2.5237		2020	3.18724	2.66593	2.70722	2.42504				2010	3.18502	3.19115
2030	3.18882	2.55142	2.73576	2.51854		2030	3.19556	2.66231	2.72386	2.43226				2020	3.1795	3.18724
2040	3.18539	2.5525	2.72974	2.51528		2040	3.19324	2.65492	2.72402	2.43407				2030	3.18882	3.19556
2050	3.18802	2.5641	2.72993	2.50994		2050	3.19548	2.66224	2.73004	2.42518				2040	3.18539	3.19324
2060	3.19738	2.56944	2.73993	2.51739		2060	3.18755	2.667	2.70519	2.42693				2050	3.18802	3.19548
2070	3.18331	2.56047	2.72903	2.50266		2070	3.20173	2.67787	2.72146	2.43409				2060	3.19738	3.18755
2080	3.19727	2.5953	2.73219	2.49891		2080	3.19922	2.67252	2.71768	2.43761				2070	3.18331	3.20173
2090	3.18213	2.57792	2.72066	2.49083		2090	3.19541	2.6637	2.70977	2.44605				2080	3.19727	3.19922
2100	3.18433	2.58258	2.72136	2.49087		2100	3.19511	2.66176	2.71008	2.44705				2090	3.18213	3.19541
2110	3.19818	2.58838	2.74305	2.49652		2110	3.19635	2.65293	2.71931	2.44961				2100	3.18433	3.19511
2120	3.19576	2.58761	2.74363	2.49048		2120	3.20433	2.65929	2.72871	2.45312				2110	3.19818	3.19635
2130	3.19157	2.57715	2.74195	2.49242		2130	3.18971	2.64196	2.71726	2.44643				2120	3.19576	3.20433
2140	3.18796	2.5751	2.73332	2.49479		2140	3.19226	2.64124	2.7271	2.44291				2130	3.19157	3.18971
2150	3.18213	2.56562	2.72995	2.49336		2150	3.19353	2.63605	2.72261	2.45682				2140	3.18796	3.19226
2160	3.1837	2.57916	2.72308	2.49091		2160	3.20214	2.64371	2.72737	2.4657				2150	3.18213	3.19353
2170	3.18356	2.58916	2.71971	2.48386		2170	3.19957	2.63732	2.72816	2.46499				2160	3.1837	3.20214
2180	3.18223	2.57645	2.71915	2.49425		2180	3.19325	2.62874	2.71442	2.47292				2170	3.18356	3.19957
2190	3.17804	2.57223	2.70912	2.49882		2190	3.19449	2.63086	2.71454	2.47375				2180	3.18223	3.19325
2200	3.18822	2.58708	2.7287	2.48811		2200	3.19941	2.64039	2.71125	2.47991				2190	3.17804	3.19449
2210	3.19007	2.58452	2.7258	2.49867		2210	3.19423	2.63903	2.70282	2.4772				2200	3.18822	3.19941
2220	3.18058	2.57843	2.71654	2.49084		2220	3.18896	2.63794	2.70282	2.46475				2210	3.19007	3.19423
2230	3.18668	2.58408	2.7253	2.49101		2230	3.19383	2.63221	2.71127	2.47419				2220	3.18058	3.18896
2240	3.19297	2.57608	2.73503	2.50469		2240	3.18684	2.63343	2.696	2.47154				2230	3.18668	3.19383
2250	3.18759	2.57255	2.72728	2.50309		2250	3.19841	2.63745	2.70492	2.48735				2240	3.19297	3.18684
2260	3.17783	2.56883	2.71868	2.49142		2260	3.19135	2.62493	2.70876	2.47826				2250	3.18759	3.19841
2270	3.18664	2.57887	2.73302	2.48785		2270	3.20449	2.63176	2.72688	2.48505				2260	3.17783	3.19135
2280	3.19133	2.58273	2.74128	2.48678		2280	3.19748	2.62534	2.72264	2.47843				2270	3.18664	3.20449
2290	3.18184	2.57953	2.73149	2.47654		2290	3.19624	2.62005	2.72169	2.48187				2280	3.19133	3.19748
2300	3.17968	2.56679	2.74084	2.47389		2300	3.19731	2.62073	2.72353	2.48188				2290	3.18184	3.19624
2310	3.18757	2.57587	2.75528	2.46872		2310	3.19845	2.61805	2.71678	2.49501				2300	3.17968	3.19731
2320	3.18495	2.56078	2.75413	2.47891		2320	3.1983	2.62094	2.71526	2.49326				2310	3.18757	3.19845
2330	3.17118	2.5476	2.74211	2.47049		2330	3.19564	2.61313	2.70802	2.50247				2320	3.18495	3.1983
2340	3.18047	2.56025	2.75327	2.46887		2340	3.19044	2.60348	2.70725	2.50009				2330	3.17118	3.19564
2350	3.1808	2.5629	2.74753	2.47337		2350	3.20277	2.61065	2.71541	2.51527				2340	3.18047	3.19044
2360	3.178	2.55682	2.74712	2.47293		2360	3.19494	2.59993	2.70892	2.51346				2350	3.1808	3.20277
2370	3.1811	2.57656	2.73899	2.46942		2370	3.19362	2.6023	2.70933	2.5072				2360	3.178	3.19494
2380	3.17388	2.57334	2.73238	2.4615		2380	3.20159	2.61306	2.72126	2.5034				2370	3.1811	3.19362
2390	3.16853	2.58588	2.72748	2.43993		2390	3.20229	2.60176	2.72759	2.51005				2380	3.17388	3.20159
2400	3.18208	2.5978	2.7407	2.44771		2400	3.18377	2.58553	2.70283	2.5065				2390	3.16853	3.20229
2410	3.18311	2.59394	2.75087	2.44305		2410	3.1862	2.58697	2.70977	2.50369				2400	3.18208	3.18377
2420	3.17902	2.59576	2.75098	2.43033		2420	3.19646	2.58351	2.71734	2.52512				2410	3.18311	3.1862
2430	3.1717	2.58431	2.73653	2.43969		2430	3.20388	2.59325	2.72136	2.52961				2420	3.17902	3.19646
2440	3.17908	2.59935	2.73583	2.44371		2440	3.19285	2.59128	2.70418	2.52216				2430	3.1717	3.20388
2450	3.18006	2.5994	2.73949	2.44211		2450	3.18365	2.5763	2.69701	2.52191				2440	3.17908	3.19285
2460	3.17164	2.58256	2.73333	2.44497		2460	3.19557	2.57985	2.70637	2.53836				2450	3.18006	3.18365
2470	3.18527	2.58512	2.75519	2.45314		2470	3.18233	2.56658	2.69632	2.52924				2460	3.17164	3.19557
2480	3.19501	2.58944	2.76185	2.46642		2480	3.19837	2.56678	2.70744	2.55746				2470	3.18527	3.18233
2490	3.18742	2.57887	2.75125	2.46967		2490	3.20142	2.57294	2.70661	2.55976				2480	3.19501	3.19837
2500	3.18619	2.5662	2.75483	2.47572		2500	3.19525	2.57061	2.71007	2.54298				2490	3.18742	3.20142
2510	3.1775	2.56241	2.74756	2.46536		2510	3.18655	2.55576	2.7091	2.53714				2500	3.18619	3.19525
2520	3.18005	2.55882	2.74718	2.47605		2520	3.19703	2.57747	2.70967	2.54095				2510	3.1775	3.18655
2530	3.19208	2.57217	2.75109	2.48881		2530	3.18665	2.5639	2.71006	2.52814				2520	3.18005	3.19703
2540	3.18638	2.56699	2.74774	2.48327		2540	3.19817	2.58257	2.71649	2.53131				2530	3.19208	3.18665
2550	3.17625	2.55892	2.736	2.47856		2550	3.19204	2.57438	2.71579	2.52492				2540	3.18638	3.19817
2560	3.17472	2.56894	2.73525	2.46508		2560	3.20018	2.57997	2.72448	2.53046				2550	3.17625	3.19204
2570	3.18211	2.57027	2.74727	2.46939		2570	3.19998	2.57427	2.72812	2.53185				2560	3.17472	3.20018
2580	3.19719	2.57908	2.76266	2.48196		2580	3.1947	2.56611	2.71944	2.53611				2570	3.18211	3.19998
2590	3.19414	2.57297	2.75995	2.48346		2590	3.19117	2.55111	2.72147	2.5402				2580	3.19719	3.1947
2600	3.18225	2.56654	2.74655	2.47443		2600	3.19109	2.54617	2.72503	2.54112				2590	3.19414	3.19117
2610	3.18645	2.56771	2.75734	2.47203		2610	3.19201	2.55472	2.71648	2.54402				2600	3.18225	3.19109
2620	3.17701	2.55386	2.74835	2.47208		2620	3.18216	2.54671	2.70746	2.53696				2610	3.18645	3.19201
2630	3.18945	2.56015	2.75302	2.49233		2630	3.18999	2.55643	2.71576	2.53798				2620	3.17701	3.18216
2640	3.19429	2.55931	2.75971	2.49818		2640	3.21085	2.56329	2.74577	2.55135				2630	3.18945	3.18999
2650	3.18449	2.55402	2.74205	2.49801		2650	3.19644	2.56129	2.72962	2.53446				2640	3.19429	3.21085
2660	3.18264	2.55148	2.73655	2.50194		2660	3.19772	2.55423	2.73795	2.53582				2650	3.18449	3.19644
2670	3.18182	2.53518	2.73742	2.51541		2670	3.19337	2.55553	2.72899	2.53319				2660	3.18264	3.19772
2680	3.18367	2.52586	2.74774	2.51822		2680	3.18306	2.54786	2.7247	2.51956				2670	3.18182	3.19337
2690	3.19024	2.54073	2.74892	2.5186		2690	3.18121	2.53392	2.7336	2.51929				2680	3.18367	3.18306
2700	3.20262	2.55982	2.76192	2.51647		2700	3.17675	2.54555	2.71691	2.51437				2690	3.19024	3.18121
2710	3.19341	2.55498	2.75475	2.50582		2710	3.17838	2.546	2.72187	2.51267				2700	3.20262	3.17675
2720	3.18776	2.55559	2.75071	2.49524		2720	3.18127	2.55652	2.7163	2.51532				2710	3.19341	3.17838
2730	3.19814	2.56723	2.75921	2.50044		2730	3.18306	2.56704	2.72126	2.50375				2720	3.18776	3.18127
2740	3.18459	2.53764	2.75101	2.50511		2740	3.18085	2.54302	2.73071	2.51235				2730	3.19814	3.18306
2750	3.18918	2.54298	2.75269	2.50954		2750	3.19257	2.5537	2.7485	2.51183				2740	3.18459	3.18085
2760	3.18635	2.55907	2.74676	2.4924		2760	3.18277	2.54269	2.74441	2.5026				2750	3.18918	3.19257
2770	3.1875	2.57569	2.73874	2.48705		2770	3.18108	2.55684	2.74482	2.48335				2760	3.18635	3.18277
2780	3.18826	2.57127	2.74708	2.48439		2780	3.18287	2.56068	2.74831	2.48013				2770	3.1875	3.18108
2790	3.1885	2.57776	2.73849	2.48774		2790	3.18449	2.55135	2.74505	2.49745				2780	3.18826	3.18287
2800	3.1894	2.58277	2.73852	2.48483		2800	3.18339	2.54765	2.7409	2.50298				2790	3.1885	3.18449
2810	3.19956	2.5914	2.74247	2.49758		2810	3.18356	2.54715	2.74019	2.5047				2800	3.1894	3.18339
2820	3.19241	2.58819	2.73406	2.49183		2820	3.17858	2.54639	2.73859	2.49456				2810	3.19956	3.18356
2830	3.18362	2.58855	2.72859	2.47489		2830	3.19031	2.55082	2.74831	2.50924				2820	3.19241	3.17858
2840	3.18685	2.57557	2.72961	2.49553		2840	3.19036	2.56094	2.73654	2.51191				2830	3.18362	3.19031
2850	3.18938	2.57044	2.72926	2.50764		2850	3.17994	2.55418	2.73104	2.49833				2840	3.18685	3.19036
2860	3.19006	2.56776	2.73432	2.50661		2860	3.18532	2.54979	2.74252	2.50394				2850	3.18938	3.17994
2870	3.18164	2.55809	2.73345	2.49601		2870	3.1803	2.55344	2.73959	2.49063				2860	3.19006	3.18532
2880	3.17861	2.55628	2.73185	2.4919		2880	3.18438	2.55347	2.74175	2.49863				2870	3.18164	3.1803
2890	3.18517	2.55514	2.736	2.50524		2890	3.17712	2.54703	2.73323	2.49606				2880	3.17861	3.18438
2900	3.17923	2.55051	2.72708	2.5046		2900	3.19062	2.56574	2.74705	2.49615				2890	3.18517	3.17712
2910	3.17802	2.54997	2.72719	2.50193		2910	3.19027	2.58208	2.74324	2.48257				2900	3.17923	3.19062
2920	3.18214	2.5478	2.73437	2.50678		2920	3.18745	2.57753	2.74139	2.48209				2910	3.17802	3.19027
2930	3.18504	2.54783	2.73304	2.51555		2930	3.17998	2.56516	2.74167	2.47543				2920	3.18214	3.18745
2940	3.19931	2.54986	2.7543	2.52649		2940	3.18367	2.57499	2.74407	2.47205				2930	3.18504	3.17998
2950	3.19984	2.54969	2.75363	2.52874		2950	3.18727	2.57272	2.7503	2.47676				2940	3.19931	3.18367
2960	3.19086	2.52729	2.74895	2.53361		2960	3.1818	2.56213	2.74263	2.48216				2950	3.19984	3.18727
2970	3.19669	2.53109	2.75605	2.53683		2970	3.18798	2.56597	2.7472	2.48901				2960	3.19086	3.1818
2980	3.19883	2.54274	2.75126	2.53576		2980	3.19561	2.57319	2.75431	2.49326				2970	3.19669	3.18798
2990	3.1899	2.53921	2.73679	2.53245		2990	3.18614	2.57007	2.74276	2.48496				2980	3.19883	3.19561
3000	3.20644	2.56222	2.75033	2.53638		3000	3.18567	2.57655	2.74985	2.46917				2990	3.1899	3.18614
3010	3.19509	2.56247	2.73179	2.52751		3010	3.18928	2.58226	2.7511	2.47111				3000	3.20644	3.18567
3020	3.20692	2.57395	2.7447	2.53181		3020	3.18025	2.58013	2.74227	2.45985				3010	3.19509	3.18928
3030	3.20198	2.5539	2.75372	2.52982		3030	3.18165	2.58533	2.73722	2.46362				3020	3.20692	3.18025
3040	3.19732	2.53178	2.76134	2.53194		3040	3.17309	2.57921	2.72819	2.45796				3030	3.20198	3.18165
3050	3.18904	2.51803	2.75091	2.53614		3050	3.18258	2.5878	2.74067	2.45959				3040	3.19732	3.17309
3060	3.19588	2.53553	2.75155	2.53522		3060	3.19084	2.59391	2.74274	2.47224				3050	3.18904	3.18258
3070	3.18733	2.52568	2.73284	2.54377		3070	3.17804	2.59021	2.72702	2.4605				3060	3.19588	3.19084
3080	3.18452	2.5274	2.72826	2.53991		3080	3.1805	2.60246	2.72482	2.45635				3070	3.18733	3.17804
3090	3.19197	2.53744	2.73177	2.54483		3090	3.18856	2.60241	2.74046	2.4599				3080	3.18452	3.1805
3100	3.19122	2.53566	2.73584	2.54034		3100	3.19328	2.60967	2.73625	2.46914				3090	3.19197	3.18856
3110	3.18812	2.53267	2.73686	2.53444		3110	3.18228	2.58352	2.73439	2.47028				3100	3.19122	3.19328
3120	3.18971	2.53974	2.7296	2.5392		3120	3.17825	2.5896	2.72999	2.4584				3110	3.18812	3.18228
3130	3.1887	2.53682	2.71859	2.55136		3130	3.18238	2.59317	2.73253	2.46249				3120	3.18971	3.17825
3140	3.18121	2.54526	2.70378	2.53997		3140	3.17429	2.59521	2.72084	2.45238				3130	3.1887	3.18238
3150	3.18863	2.53752	2.72603	2.54252		3150	3.18135	2.60359	2.72502	2.45715				3140	3.18121	3.17429
3160	3.19704	2.55037	2.72626	2.55054		3160	3.18191	2.60896	2.71621	2.46265				3150	3.18863	3.18135
3170	3.17799	2.53951	2.71051	2.53048		3170	3.17444	2.59827	2.71629	2.45458				3160	3.19704	3.18191
3180	3.17718	2.53072	2.7132	2.53437		3180	3.18177	2.59545	2.72278	2.4693				3170	3.17799	3.17444
3190	3.17907	2.54218	2.71814	2.52231		3190	3.17607	2.5958	2.7108	2.46744				3180	3.17718	3.18177
3200	3.19088	2.54898	2.72865	2.53389		3200	3.17375	2.60673	2.70567	2.45553				3190	3.17907	3.17607
3210	3.1914	2.54726	2.73163	2.53372		3210	3.18235	2.6202	2.71573	2.45235				3200	3.19088	3.17375
3220	3.17752	2.53451	2.72293	2.52094		3220	3.17775	2.62293	2.71074	2.44302				3210	3.1914	3.18235
3230	3.19182	2.55577	2.72713	2.53106		3230	3.18434	2.62033	2.71985	2.45282				3220	3.17752	3.17775
3240	3.1888	2.56442	2.71679	2.52582		3240	3.18086	2.61797	2.71492	2.45178				3230	3.19182	3.18434
3250	3.18821	2.55763	2.72249	2.52506		3250	3.18757	2.63824	2.71852	2.44347				3240	3.1888	3.18086
3260	3.18609	2.54564	2.72157	2.53281		3260	3.178	2.64472	2.7033	2.42838				3250	3.18821	3.18757
3270	3.18953	2.54341	2.72621	2.53872		3270	3.17876	2.64602	2.70464	2.42746				3260	3.18609	3.178
3280	3.18505	2.53792	2.72154	2.53796		3280	3.18302	2.65616	2.71229	2.41899				3270	3.18953	3.17876
3290	3.19183	2.54406	2.72239	2.54793		3290	3.17995	2.66129	2.7125	2.40499				3280	3.18505	3.18302
3300	3.19194	2.53883	2.72696	2.54853		3300	3.17889	2.65855	2.70992	2.40815				3290	3.19183	3.17995
3310	3.20316	2.54722	2.73778	2.5567		3310	3.18222	2.65864	2.7138	2.41247				3300	3.19194	3.17889
3320	3.19895	2.5421	2.74121	2.54757		3320	3.19092	2.65833	2.71883	2.43005				3310	3.20316	3.18222
3330	3.19543	2.54557	2.73929	2.53732		3330	3.18908	2.65555	2.71794	2.42925				3320	3.19895	3.19092
3340	3.18818	2.55413	2.72491	2.52592		3340	3.17968	2.633	2.7126	2.43513				3330	3.19543	3.18908
3350	3.19374	2.55092	2.7429	2.52373		3350	3.19158	2.64054	2.73353	2.43468				3340	3.18818	3.17968
3360	3.19272	2.53606	2.741	2.53816		3360	3.18006	2.64415	2.71582	2.42039				3350	3.19374	3.19158
3370	3.18698	2.51486	2.7447	2.54081		3370	3.18321	2.64093	2.72188	2.42539				3360	3.19272	3.18006
3380	3.18059	2.51332	2.73383	2.53807		3380	3.18509	2.63526	2.72506	2.43289				3370	3.18698	3.18321
3390	3.1894	2.49993	2.7541	2.55144		3390	3.18734	2.63583	2.72658	2.43649				3380	3.18059	3.18509
3400	3.17991	2.50388	2.74345	2.53529		3400	3.18314	2.63571	2.729	2.4229				3390	3.1894	3.18734
3410	3.18947	2.50944	2.76072	2.53507		3410	3.19025	2.65475	2.73206	2.41734				3400	3.17991	3.18314
3420	3.20021	2.52328	2.77085	2.53736		3420	3.18951	2.64992	2.73127	2.42159				3410	3.18947	3.19025
3430	3.20287	2.51793	2.78181	2.53739		3430	3.18127	2.65242	2.71818	2.41186				3420	3.20021	3.18951
3440	3.19208	2.52041	2.77027	2.52029		3440	3.18238	2.64859	2.71654	2.42085				3430	3.20287	3.18127
3450	3.18829	2.51376	2.77224	2.51517		3450	3.18394	2.64762	2.71816	2.42418				3440	3.19208	3.18238
3460	3.18255	2.51929	2.76667	2.5012		3460	3.17586	2.6481	2.70954	2.41207				3450	3.18829	3.18394
3470	3.18559	2.51754	2.77227	2.50449		3470	3.17438	2.64555	2.71273	2.40738				3460	3.18255	3.17586
3480	3.1739	2.5277	2.75081	2.48819		3480	3.1844	2.65137	2.72457	2.41407				3470	3.18559	3.17438
3490	3.17622	2.53048	2.76372	2.47694		3490	3.17916	2.65762	2.71179	2.40775				3480	3.1739	3.1844
3500	3.1751	2.52553	2.7559	2.48782		3500	3.18231	2.65114	2.71419	2.4205				3490	3.17622	3.17916
3510	3.16336	2.52983	2.74344	2.46723		3510	3.18512	2.63782	2.72922	2.42555				3500	3.1751	3.18231
3520	3.16967	2.54367	2.74063	2.4723		3520	3.18875	2.6317	2.73601	2.43407				3510	3.16336	3.18512
3530	3.17136	2.55708	2.73387	2.4703		3530	3.18483	2.61219	2.73141	2.44992				3520	3.16967	3.18875
3540	3.17207	2.56044	2.73137	2.4714		3540	3.17857	2.60836	2.72811	2.44141				3530	3.17136	3.18483
3550	3.18258	2.56719	2.73672	2.48548		3550	3.17653	2.60213	2.72772	2.44319				3540	3.17207	3.17857
3560	3.17605	2.57126	2.72351	2.47906		3560	3.17188	2.60771	2.7155	2.43875				3550	3.18258	3.17653
3570	3.17585	2.56704	2.72054	2.48617		3570	3.1743	2.61188	2.71516	2.44096				3560	3.17605	3.17188
3580	3.16403	2.55244	2.71403	2.47817		3580	3.16906	2.60761	2.70661	2.44142				3570	3.17585	3.1743
3590	3.16797	2.55397	2.71491	2.48569		3590	3.17066	2.60545	2.7113	2.44266				3580	3.16403	3.16906
3600	3.16933	2.5586	2.71825	2.48073		3600	3.16752	2.60961	2.70167	2.44074				3590	3.16797	3.17066
3610	3.18027	2.56681	2.72427	2.4936		3610	3.17426	2.61946	2.70814	2.44053				3600	3.16933	3.16752
3620	3.17529	2.56835	2.71905	2.48501		3620	3.17546	2.62271	2.70254	2.44638				3610	3.18027	3.17426
3630	3.17965	2.57758	2.70812	2.49851		3630	3.17527	2.62118	2.70361	2.44635				3620	3.17529	3.17546
3640	3.17407	2.5716	2.70748	2.49116		3640	3.17232	2.62209	2.70207	2.4394				3630	3.17965	3.17527
3650	3.18082	2.57977	2.72584	2.47988		3650	3.16708	2.60676	2.69612	2.44877				3640	3.17407	3.17232
3660	3.17872	2.58985	2.70735	2.48423		3660	3.17629	2.61309	2.7096	2.45101				3650	3.18082	3.16708
3670	3.16905	2.57742	2.70607	2.47385		3670	3.1766	2.61814	2.71645	2.43881				3660	3.17872	3.17629
3680	3.17403	2.58992	2.6992	2.48104		3680	3.18557	2.633	2.72985	2.43124				3670	3.16905	3.1766
3690	3.1762	2.57868	2.70073	2.49659		3690	3.17642	2.62826	2.71599	2.42794				3680	3.17403	3.18557
3700	3.18766	2.58204	2.71604	2.50571		3700	3.17563	2.63018	2.72223	2.4168				3690	3.1762	3.17642
3710	3.17535	2.57873	2.70063	2.49447		3710	3.18124	2.6267	2.73546	2.42039				3700	3.18766	3.17563
3720	3.18189	2.58497	2.70108	2.50419		3720	3.17787	2.62565	2.73613	2.41191				3710	3.17535	3.18124
3730	3.18574	2.5903	2.70435	2.50495		3730	3.17918	2.62575	2.72721	2.42533				3720	3.18189	3.17787
3740	3.18155	2.59107	2.70115	2.49694		3740	3.17411	2.62421	2.71926	2.42262				3730	3.18574	3.17918
3750	3.17551	2.58114	2.69609	2.49732		3750	3.17495	2.62367	2.72458	2.41945				3740	3.18155	3.17411
3760	3.19307	2.58978	2.70552	2.52282		3760	3.18114	2.62666	2.72872	2.42777				3750	3.17551	3.17495
3770	3.19125	2.5845	2.70702	2.52201		3770	3.17977	2.63554	2.72076	2.42349				3760	3.19307	3.18114
3780	3.18419	2.57094	2.70358	2.52172		3780	3.17969	2.65141	2.71484	2.41257				3770	3.19125	3.17977
3790	3.1856	2.56465	2.7028	2.53251		3790	3.18338	2.65253	2.72141	2.41366				3780	3.18419	3.17969
3800	3.16959	2.55716	2.68878	2.51476		3800	3.17615	2.64439	2.72452	2.4				3790	3.1856	3.18338
3810	3.17619	2.57152	2.69097	2.51442		3810	3.17584	2.64246	2.72082	2.4055				3800	3.16959	3.17615
3820	3.1733	2.56907	2.67677	2.52477		3820	3.19643	2.65852	2.74231	2.41791				3810	3.17619	3.17584
3830	3.18052	2.57466	2.68262	2.53102		3830	3.18563	2.64791	2.7225	2.42343				3820	3.1733	3.19643
3840	3.17817	2.576	2.67988	2.52664		3840	3.17215	2.62812	2.72562	2.40603				3830	3.18052	3.18563
3850	3.17385	2.57688	2.67851	2.51632		3850	3.18476	2.6464	2.735	2.40869				3840	3.17817	3.17215
3860	3.17057	2.56905	2.67797	2.51664		3860	3.1801	2.63974	2.71743	2.42351				3850	3.17385	3.18476
3870	3.16836	2.56044	2.67698	2.5209		3870	3.17951	2.63668	2.72638	2.41522				3860	3.17057	3.1801
3880	3.16857	2.57416	2.6722	2.51253		3880	3.17701	2.64404	2.72555	2.4015				3870	3.16836	3.17951
3890	3.17656	2.57398	2.68581	2.51835		3890	3.17087	2.64387	2.71033	2.40269				3880	3.16857	3.17701
3900	3.18609	2.58293	2.7011	2.51693		3900	3.16739	2.64153	2.70966	2.39683				3890	3.17656	3.17087
3910	3.17849	2.59414	2.68556	2.50276		3910	3.16133	2.64038	2.69997	2.39302				3900	3.18609	3.16739
3920	3.17248	2.58985	2.67519	2.50305		3920	3.16689	2.64558	2.70556	2.39569				3910	3.17849	3.16133
3930	3.17743	2.60166	2.67025	2.50865		3930	3.16449	2.64662	2.69379	2.40144				3920	3.17248	3.16689
3940	3.17679	2.60558	2.6769	2.49583		3940	3.1686	2.64833	2.70737	2.39511				3930	3.17743	3.16449
3950	3.17645	2.61696	2.68309	2.47632		3950	3.1664	2.64431	2.70291	2.39876				3940	3.17679	3.1686
3960	3.17119	2.6135	2.67884	2.47111		3960	3.17778	2.66551	2.70989	2.39754				3950	3.17645	3.1664
3970	3.17282	2.61667	2.68003	2.47063		3970	3.16742	2.6506	2.70221	2.39528				3960	3.17119	3.17778
3980	3.18094	2.63186	2.67624	2.47949		3980	3.17241	2.66617	2.70485	2.38822				3970	3.17282	3.16742
3990	3.17407	2.63127	2.66548	2.4741		3990	3.16319	2.66134	2.69118	2.38462				3980	3.18094	3.17241
4000	3.18822	2.63407	2.6739	2.49828		4000	3.16362	2.66366	2.69076	2.38364				3990	3.17407	3.16319
4010	3.18369	2.61838	2.67383	2.50329		4010	3.15517	2.64782	2.69034	2.37934				4000	3.18822	3.16362
4020	3.17859	2.61076	2.6795	2.49222		4020	3.1592	2.64696	2.6894	2.39205				4010	3.18369	3.15517
4030	3.17469	2.60356	2.67493	2.4947		4030	3.1667	2.65027	2.69867	2.39774				4020	3.17859	3.1592
4040	3.18663	2.62295	2.67505	2.5047		4040	3.17172	2.66212	2.69837	2.39824				4030	3.17469	3.1667
4050	3.1638	2.59833	2.65743	2.49119		4050	3.16691	2.65302	2.68908	2.40602				4040	3.18663	3.17172
4060	3.17963	2.60471	2.67079	2.51048		4060	3.17407	2.65422	2.69736	2.41429				4050	3.1638	3.16691
4070	3.17603	2.5947	2.67189	2.51054		4070	3.16413	2.64958	2.67855	2.41424				4060	3.17963	3.17407
4080	3.1758	2.59333	2.66825	2.51526		4080	3.16234	2.65058	2.69217	2.3932				4070	3.17603	3.16413
4090	3.17872	2.59741	2.67368	2.51264		4090	3.16691	2.65091	2.69421	2.4026				4080	3.1758	3.16234
4100	3.1824	2.60689	2.67716	2.50846		4100	3.16615	2.6443	2.69512	2.40688				4090	3.17872	3.16691
4110	3.17711	2.60864	2.66535	2.50579		4110	3.16674	2.63938	2.69601	2.41283				4100	3.1824	3.16615
4120	3.18935	2.63528	2.66181	2.51276		4120	3.15982	2.63782	2.6904	2.40262				4110	3.17711	3.16674
4130	3.1852	2.63169	2.66246	2.50529		4130	3.17022	2.65036	2.70738	2.39714				4120	3.18935	3.15982
4140	3.17535	2.62812	2.65294	2.49411		4140	3.17006	2.64015	2.70807	2.40718				4130	3.1852	3.17022
4150	3.17938	2.64393	2.64541	2.49567		4150	3.1717	2.63212	2.71599	2.41136				4140	3.17535	3.17006
4160	3.17682	2.64059	2.64399	2.49418		4160	3.17125	2.63167	2.71049	2.41685				4150	3.17938	3.1717
4170	3.18098	2.64784	2.64336	2.49776		4170	3.1736	2.64541	2.70805	2.41076				4160	3.17682	3.17125
4180	3.18182	2.65945	2.6376	2.49366		4180	3.1662	2.63755	2.70172	2.40701				4170	3.18098	3.1736
4190	3.18132	2.65808	2.64663	2.48425		4190	3.17776	2.64393	2.70896	2.42229				4180	3.18182	3.1662
4200	3.16963	2.65096	2.63321	2.47622		4200	3.17131	2.63817	2.70146	2.42005				4190	3.18132	3.17776
4210	3.19215	2.6874	2.63694	2.49079		4210	3.16196	2.63375	2.68688	2.41661				4200	3.16963	3.17131
4220	3.20196	2.70211	2.6451	2.49143		4220	3.16363	2.64184	2.68761	2.41132				4210	3.19215	3.16196
4230	3.18072	2.69198	2.63132	2.46238		4230	3.16742	2.65208	2.69288	2.40416				4220	3.20196	3.16363
4240	3.19703	2.7173	2.63481	2.47307		4240	3.17179	2.65943	2.68691	2.41421				4230	3.18072	3.16742
4250	3.19169	2.71637	2.62761	2.46795		4250	3.16951	2.66325	2.69013	2.4004				4240	3.19703	3.17179
4260	3.19222	2.72651	2.62093	2.46524		4260	3.16542	2.66565	2.68188	2.39617				4250	3.19169	3.16951
4270	3.19558	2.7487	2.61576	2.45478		4270	3.16697	2.67384	2.67506	2.39875				4260	3.19222	3.16542
4280	3.18117	2.73035	2.61177	2.44204		4280	3.16031	2.67453	2.66243	2.39447				4270	3.19558	3.16697
4290	3.18208	2.73338	2.60887	2.44413		4290	3.16699	2.6808	2.6767	2.3892				4280	3.18117	3.16031
4300	3.1743	2.72654	2.59892	2.44213		4300	3.163	2.68082	2.66793	2.38841				4290	3.18208	3.16699
4310	3.18268	2.73265	2.59779	2.45824		4310	3.163	2.6836	2.67577	2.37649				4300	3.1743	3.163
4320	3.17821	2.73127	2.59956	2.44631		4320	3.16537	2.68364	2.68609	2.37111				4310	3.18268	3.163
4330	3.16941	2.71716	2.59404	2.44506		4330	3.17199	2.69295	2.69062	2.37311				4320	3.17821	3.16537
4340	3.17745	2.71812	2.59442	2.46438		4340	3.17522	2.70615	2.69349	2.36345				4330	3.16941	3.17199
4350	3.18193	2.72506	2.5913	2.47156		4350	3.16321	2.69258	2.68759	2.35344				4340	3.17745	3.17522
4360	3.1745	2.7085	2.58133	2.48107		4360	3.16164	2.68849	2.68959	2.35162				4350	3.18193	3.16321
4370	3.17583	2.71024	2.5727	2.49151		4370	3.17255	2.69371	2.70458	2.35783				4360	3.1745	3.16164
4380	3.17812	2.70996	2.58159	2.48846		4380	3.16132	2.68654	2.69208	2.35013				4370	3.17583	3.17255
4390	3.1744	2.70026	2.57722	2.49402		4390	3.15177	2.68333	2.67515	2.34746				4380	3.17812	3.16132
4400	3.17089	2.70239	2.57589	2.48413		4400	3.1487	2.68196	2.67856	2.3369				4390	3.1744	3.15177
4410	3.1632	2.70418	2.55649	2.48262		4410	3.14624	2.67856	2.67058	2.34328				4400	3.17089	3.1487
4420	3.1724	2.71248	2.55429	2.49927		4420	3.16046	2.69406	2.68817	2.34367				4410	3.1632	3.14624
4430	3.16221	2.71168	2.5468	2.48189		4430	3.15955	2.68389	2.68124	2.36077				4420	3.1724	3.16046
4440	3.16709	2.71943	2.54248	2.49026		4440	3.16638	2.68466	2.69157	2.36643				4430	3.16221	3.15955
4450	3.16429	2.71044	2.54243	2.49298		4450	3.17409	2.68966	2.71314	2.35676				4440	3.16709	3.16638
4460	3.16468	2.70623	2.54819	2.49267		4460	3.16461	2.67752	2.69533	2.36549				4450	3.16429	3.17409
4470	3.16047	2.69256	2.5631	2.48148		4470	3.17654	2.67632	2.7136	2.3779				4460	3.16468	3.16461
4480	3.17455	2.7034	2.57378	2.49455		4480	3.1699	2.65326	2.69829	2.40332				4470	3.16047	3.17654
4490	3.16915	2.68889	2.5747	2.49555		4490	3.16105	2.6522	2.69291	2.38716				4480	3.17455	3.1699
4500	3.17974	2.70279	2.57864	2.50339		4500	3.16166	2.65129	2.6954	2.38698				4490	3.16915	3.16105
4510	3.16722	2.69499	2.56536	2.49369		4510	3.16351	2.6491	2.70017	2.38891				4500	3.17974	3.16166
4520	3.16781	2.70064	2.56757	2.48679		4520	3.16599	2.64938	2.69696	2.39877				4510	3.16722	3.16351
4530	3.17007	2.70195	2.57199	2.48657		4530	3.16207	2.64636	2.69821	2.39038				4520	3.16781	3.16599
4540	3.18028	2.70662	2.5746	2.50481		4540	3.15696	2.65179	2.68643	2.38408				4530	3.17007	3.16207
4550	3.17392	2.70081	2.56291	2.50691		4550	3.1625	2.65974	2.68584	2.39059				4540	3.18028	3.15696
4560	3.15936	2.69359	2.54528	2.49583		4560	3.17434	2.67319	2.69414	2.39761				4550	3.17392	3.1625
4570	3.16831	2.70228	2.55684	2.49734		4570	3.16893	2.67089	2.69919	2.38012				4560	3.15936	3.17434
4580	3.1665	2.7065	2.54947	2.4957		4580	3.18027	2.6938	2.70513	2.3778				4570	3.16831	3.16893
4590	3.16714	2.70337	2.54637	2.50388		4590	3.16346	2.67618	2.68886	2.3713				4580	3.1665	3.18027
4600	3.16975	2.69999	2.55074	2.50967		4600	3.17268	2.68628	2.70439	2.36686				4590	3.16714	3.16346
4610	3.1596	2.6931	2.54784	2.49437		4610	3.18783	2.69919	2.71718	2.3782				4600	3.16975	3.17268
4620	3.16838	2.70929	2.55036	2.49654		4620	3.17514	2.6821	2.70602	2.37629				4610	3.1596	3.18783
4630	3.15538	2.6946	2.5434	2.48657		4630	3.17201	2.68732	2.70215	2.36642				4620	3.16838	3.17514
4640	3.16525	2.69931	2.55864	2.49092		4640	3.17228	2.68523	2.70895	2.36174				4630	3.15538	3.17201
4650	3.16059	2.6939	2.55372	2.49001		4650	3.17203	2.69008	2.71256	2.35138				4640	3.16525	3.17228
4660	3.16533	2.68836	2.57396	2.48718		4660	3.16693	2.68491	2.70605	2.35104				4650	3.16059	3.17203
4670	3.16309	2.69075	2.56408	2.48911		4670	3.16592	2.68642	2.70278	2.35037				4660	3.16533	3.16693
4680	3.16858	2.6998	2.55789	2.49962		4680	3.1733	2.69784	2.71378	2.3445				4670	3.16309	3.16592
4690	3.16856	2.70409	2.55538	2.49749		4690	3.17349	2.70531	2.71302	2.33728				4680	3.16858	3.1733
4700	3.16579	2.7028	2.55147	2.49587		4700	3.17816	2.71169	2.71827	2.33648				4690	3.16856	3.17349
4710	3.16529	2.69647	2.55896	2.49378		4710	3.16895	2.69217	2.7087	2.34515				4700	3.16579	3.17816
4720	3.16081	2.69214	2.55072	2.49553		4720	3.17304	2.68887	2.71701	2.35037				4710	3.16529	3.16895
4730	3.17997	2.69888	2.57278	2.51422		4730	3.16934	2.68951	2.70945	2.34837				4720	3.16081	3.17304
4740	3.1729	2.68933	2.57509	2.50419		4740	3.18618	2.69717	2.72639	2.36548				4730	3.17997	3.16934
4750	3.16816	2.67924	2.57406	2.50408		4750	3.17752	2.69818	2.70917	2.36081				4740	3.1729	3.18618
4760	3.1713	2.68813	2.57266	2.50394		4760	3.18031	2.71047	2.71279	2.35007				4750	3.16816	3.17752
4770	3.17262	2.69948	2.56601	2.5019		4770	3.1947	2.72052	2.73443	2.35242				4760	3.1713	3.18031
4780	3.17821	2.71072	2.56261	2.5074		4780	3.18973	2.71832	2.72746	2.34956				4770	3.17262	3.1947
4790	3.17214	2.70223	2.56532	2.49841		4790	3.19214	2.71582	2.73311	2.35245				4780	3.17821	3.18973
4800	3.16777	2.69829	2.56233	2.49465		4800	3.19471	2.72148	2.73868	2.34637				4790	3.17214	3.19214
4810	3.17767	2.71809	2.56129	2.49937		4810	3.18595	2.71138	2.72667	2.34824				4800	3.16777	3.19471
4820	3.17664	2.71811	2.57454	2.4831		4820	3.17372	2.71103	2.71538	2.32852				4810	3.17767	3.18595
4830	3.16795	2.72133	2.56183	2.47046		4830	3.1801	2.71216	2.72185	2.33704				4820	3.17664	3.17372
4840	3.1753	2.73435	2.55087	2.48626		4840	3.18423	2.7076	2.72287	2.35234				4830	3.16795	3.1801
4850	3.17957	2.73229	2.55911	2.49096		4850	3.18486	2.70644	2.72467	2.3533				4840	3.1753	3.18423
4860	3.17056	2.72076	2.54911	2.49086		4860	3.18609	2.70901	2.7226	2.35607				4850	3.17957	3.18486
4870	3.17479	2.72074	2.54658	2.50422		4870	3.18087	2.70684	2.7154	2.35276				4860	3.17056	3.18609
4880	3.17613	2.7256	2.5421	2.50687		4880	3.17802	2.71236	2.71366	2.34068				4870	3.17479	3.18087
4890	3.17959	2.73553	2.53486	2.51215		4890	3.17502	2.69798	2.71733	2.34491				4880	3.17613	3.17802
4900	3.17176	2.73147	2.53603	2.49553		4900	3.17913	2.70801	2.72581	2.33462				4890	3.17959	3.17502
4910	3.17703	2.7307	2.53711	2.50866		4910	3.16796	2.6948	2.71664	2.33021				4900	3.17176	3.17913
4920	3.17232	2.71626	2.53532	2.51422		4920	3.16956	2.6904	2.71053	2.3467				4910	3.17703	3.16796
4930	3.1627	2.70849	2.53871	2.49485		4930	3.18155	2.69116	2.724	2.36263				4920	3.17232	3.16956
4940	3.17131	2.72709	2.53326	2.50201		4940	3.18058	2.69093	2.71908	2.36594				4930	3.1627	3.18155
4950	3.1635	2.72145	2.52018	2.50159		4950	3.17281	2.68868	2.71366	2.35382				4940	3.17131	3.18058
4960	3.16198	2.72896	2.50518	2.50463		4960	3.17729	2.70455	2.70527	2.35738				4950	3.1635	3.17281
4970	3.1649	2.731	2.50993	2.50501		4970	3.18369	2.71255	2.71138	2.35844				4960	3.16198	3.17729
4980	3.15553	2.73158	2.48633	2.50428		4980	3.18222	2.70778	2.70906	2.36263				4970	3.1649	3.18369
4990	3.16088	2.73779	2.49507	2.50229		4990	3.17523	2.71938	2.69925	2.34162				4980	3.15553	3.18222
5000	3.1563	2.72479	2.4935	2.50647		5000	3.17813	2.72493	2.70923	2.3315				4990	3.16088	3.17523
5010	3.17117	2.73923	2.50802	2.51378		5010	3.17662	2.71077	2.69871	2.35595				5000	3.1563	3.17813
5020	3.16784	2.73407	2.50368	2.51532		5020	3.18055	2.7167	2.70153	2.35649				5010	3.17117	3.17662
5030	3.15828	2.72176	2.49836	2.50993		5030	3.18149	2.7117	2.70176	2.36452				5020	3.16784	3.18055
5040	3.15479	2.72098	2.49286	2.50746		5040	3.17003	2.69992	2.69549	2.35434				5030	3.15828	3.18149
5050	3.15896	2.71481	2.50497	2.51256		5050	3.17834	2.70231	2.70881	2.35871				5040	3.15479	3.17003
5060	3.15163	2.71817	2.49431	2.5011		5060	3.17858	2.71265	2.71118	2.34475				5050	3.15896	3.17834
5070	3.15826	2.72556	2.49483	2.50926		5070	3.18201	2.71517	2.70835	2.35437				5060	3.15163	3.17858
5080	3.14804	2.70607	2.50292	2.49657		5080	3.17745	2.70081	2.70856	2.35833				5070	3.15826	3.18201
5090	3.1619	2.72344	2.51648	2.49907		5090	3.18298	2.70897	2.71333	2.35841				5080	3.14804	3.17745
5100	3.16256	2.71913	2.52745	2.49437		5100	3.17489	2.69687	2.70356	2.36168				5090	3.1619	3.18298
5110	3.15615	2.6992	2.52762	2.49961		5110	3.17533	2.70494	2.70017	2.3575				5100	3.16256	3.17489
5120	3.15743	2.69864	2.52463	2.50645		5120	3.17687	2.717	2.69824	2.34998				5110	3.15615	3.17533
5130	3.15579	2.69246	2.52949	2.50407		5130	3.17718	2.72631	2.69912	2.339				5120	3.15743	3.17687
5140	3.16221	2.69391	2.54043	2.50761		5140	3.18479	2.73531	2.71997	2.325				5130	3.15579	3.17718
5150	3.1569	2.70081	2.52078	2.50666		5150	3.18607	2.73805	2.7163	2.32956				5140	3.16221	3.18479
5160	3.16898	2.70375	2.54144	2.51311		5160	3.18794	2.73266	2.72647	2.32912				5150	3.1569	3.18607
5170	3.16079	2.69456	2.53284	2.51102		5170	3.19505	2.74217	2.73086	2.3323				5160	3.16898	3.18794
5180	3.16644	2.70367	2.5344	2.51389		5180	3.19098	2.72493	2.73261	2.33929				5170	3.16079	3.19505
5190	3.15947	2.70151	2.53265	2.50041		5190	3.19735	2.72583	2.7375	2.34991				5180	3.16644	3.19098
5200	3.16384	2.703	2.54439	2.49794		5200	3.19902	2.72559	2.73596	2.35651				5190	3.15947	3.19735
5210	3.14944	2.70581	2.53365	2.46923		5210	3.19116	2.71935	2.72567	2.35433				5200	3.16384	3.19902
5220	3.15517	2.71953	2.53476	2.46765		5220	3.19146	2.71246	2.72658	2.36203				5210	3.14944	3.19116
5230	3.15589	2.70936	2.53637	2.47899		5230	3.18866	2.72217	2.70986	2.36254				5220	3.15517	3.19146
5240	3.14762	2.68978	2.53923	2.47637		5240	3.18706	2.72214	2.72233	2.34385				5230	3.15589	3.18866
5250	3.14257	2.68391	2.53977	2.46935		5250	3.18401	2.71704	2.72433	2.33913				5240	3.14762	3.18706
5260	3.14496	2.69571	2.5349	2.46757		5260	3.17723	2.70893	2.71699	2.33865				5250	3.14257	3.18401
5270	3.14685	2.69618	2.52974	2.47718		5270	3.19604	2.72413	2.73388	2.3525				5260	3.14496	3.17723
5280	3.14997	2.69967	2.53675	2.47413		5280	3.19733	2.72978	2.73695	2.3459				5270	3.14685	3.19604
5290	3.14329	2.69358	2.52661	2.47414		5290	3.19464	2.73805	2.7311	2.33573				5280	3.14997	3.19733
5300	3.14673	2.69246	2.53242	2.47816		5300	3.18809	2.72935	2.72123	2.33952				5290	3.14329	3.19464
5310	3.15863	2.69797	2.54022	2.49441		5310	3.1826	2.72604	2.71542	2.33519				5300	3.14673	3.18809
5320	3.15813	2.70114	2.52796	2.50216		5320	3.19202	2.7295	2.72352	2.3474				5310	3.15863	3.1826
5330	3.15339	2.69792	2.51193	2.50981		5330	3.1872	2.72961	2.71059	2.34912				5320	3.15813	3.19202
5340	3.14939	2.69201	2.51618	2.50184		5340	3.19284	2.74246	2.71363	2.34598				5330	3.15339	3.1872
5350	3.14722	2.68498	2.51274	2.5074		5350	3.191	2.75008	2.71632	2.32885				5340	3.14939	3.19284
5360	3.15986	2.69581	2.52027	2.51998		5360	3.19024	2.73951	2.72291	2.33156				5350	3.14722	3.191
5370	3.15454	2.68747	2.51725	2.51858		5370	3.20047	2.75036	2.73333	2.33461				5360	3.15986	3.19024
5380	3.15598	2.70118	2.51663	2.50811		5380	3.19704	2.74562	2.72938	2.33543				5370	3.15454	3.20047
5390	3.15498	2.71066	2.50846	2.50354		5390	3.1699	2.72031	2.70713	2.31686				5380	3.15598	3.19704
5400	3.16375	2.71603	2.5246	2.50364		5400	3.18095	2.72741	2.71354	2.33127				5390	3.15498	3.1699
5410	3.16191	2.71177	2.51625	2.51199		5410	3.18949	2.73093	2.7217	2.34095				5400	3.16375	3.18095
5420	3.15821	2.71168	2.5251	2.49383		5420	3.19255	2.72035	2.72699	2.35542				5410	3.16191	3.18949
5430	3.15303	2.72072	2.50299	2.49317		5430	3.18344	2.70584	2.71372	2.36278				5420	3.15821	3.19255
5440	3.15272	2.72395	2.49874	2.49314		5440	3.189	2.70705	2.71847	2.37091				5430	3.15303	3.18344
5450	3.15758	2.72021	2.51304	2.49513		5450	3.18725	2.71328	2.7217	2.35533				5440	3.15272	3.189
5460	3.15933	2.71801	2.52423	2.49067		5460	3.19432	2.72848	2.72694	2.35086				5450	3.15758	3.18725
5470	3.1648	2.73269	2.51952	2.49324		5470	3.17964	2.72043	2.71638	2.33254				5460	3.15933	3.19432
5480	3.15744	2.7235	2.51292	2.49132		5480	3.17583	2.72003	2.71138	2.32844				5470	3.1648	3.17964
5490	3.15287	2.71988	2.50779	2.48885		5490	3.17832	2.71307	2.71685	2.33695				5480	3.15744	3.17583
5500	3.14797	2.71135	2.50268	2.49089		5500	3.1772	2.71779	2.71546	2.33004				5490	3.15287	3.17832
5510	3.15069	2.71386	2.506	2.49172		5510	3.18285	2.72578	2.72075	2.32997				5500	3.14797	3.1772
5520	3.15166	2.70645	2.51239	2.49579		5520	3.18914	2.73559	2.72231	2.33385				5510	3.15069	3.18285
5530	3.1398	2.69793	2.49452	2.49304		5530	3.1864	2.73826	2.7195	2.32649				5520	3.15166	3.18914
5540	3.1577	2.71242	2.51526	2.50169		5540	3.19031	2.74634	2.72268	2.32397				5530	3.1398	3.1864
5550	3.15635	2.70933	2.51315	2.50375		5550	3.17911	2.73577	2.70211	2.32973				5540	3.1577	3.19031
5560	3.13967	2.70116	2.49641	2.48731		5560	3.18722	2.7458	2.70777	2.33351				5550	3.15635	3.17911
5570	3.14792	2.7093	2.50802	2.48763		5570	3.18805	2.74818	2.71068	2.32961				5560	3.13967	3.18722
5580	3.14619	2.70378	2.51404	2.48317		5580	3.18973	2.7463	2.71272	2.33403				5570	3.14792	3.18805
5590	3.14854	2.71319	2.51428	2.47864		5590	3.18599	2.7432	2.71601	2.3236				5580	3.14619	3.18973
5600	3.14993	2.71216	2.51888	2.47863		5600	3.18513	2.73211	2.72031	2.3293				5590	3.14854	3.18599
5610	3.14419	2.705	2.50565	2.48526		5610	3.18447	2.73736	2.71369	2.32906				5600	3.14993	3.18513
5620	3.15629	2.71702	2.50985	2.49856		5620	3.18003	2.7348	2.71495	2.31844				5610	3.14419	3.18447
5630	3.15672	2.71539	2.50659	2.50468		5630	3.17006	2.73098	2.69681	2.31679				5620	3.15629	3.18003
5640	3.15165	2.71093	2.50426	2.49907		5640	3.17447	2.7288	2.70149	2.32596				5630	3.15672	3.17006
5650	3.15865	2.70645	2.50726	2.51851		5650	3.16923	2.72652	2.6985	2.3178				5640	3.15165	3.17447
5660	3.15706	2.70024	2.50342	2.525		5660	3.17992	2.73867	2.70419	2.32611				5650	3.15865	3.16923
5670	3.1508	2.69688	2.50066	2.51569		5670	3.17718	2.73555	2.70276	2.32394				5660	3.15706	3.17992
5680	3.15982	2.70333	2.50507	2.52697		5680	3.16937	2.72494	2.69111	2.32861				5670	3.1508	3.17718
5690	3.15527	2.70674	2.48453	2.53223		5690	3.17091	2.71729	2.6852	2.3485				5680	3.15982	3.16937
5700	3.16219	2.70944	2.49008	2.54113		5700	3.17489	2.71841	2.69564	2.34598				5690	3.15527	3.17091
5710	3.15862	2.70258	2.491	2.53866		5710	3.17483	2.71537	2.70297	2.34089				5700	3.16219	3.17489
5720	3.15695	2.70344	2.49359	2.53103		5720	3.17536	2.7207	2.69874	2.34103				5710	3.15862	3.17483
5730	3.15535	2.70188	2.48661	2.53556		5730	3.16119	2.69333	2.6884	2.34621				5720	3.15695	3.17536
5740	3.15727	2.70489	2.49499	2.52891		5740	3.17261	2.70414	2.68965	2.36311				5730	3.15535	3.16119
5750	3.16617	2.70314	2.49542	2.55247		5750	3.16757	2.70073	2.68413	2.35976				5740	3.15727	3.17261
5760	3.15562	2.69352	2.49066	2.54115		5760	3.16915	2.69552	2.68207	2.37226				5750	3.16617	3.16757
5770	3.16406	2.69847	2.49864	2.54906		5770	3.16331	2.69303	2.67637	2.36594				5760	3.15562	3.16915
5780	3.16226	2.68749	2.50395	2.55095		5780	3.16216	2.69341	2.67174	2.36766				5770	3.16406	3.16331
5790	3.15552	2.6907	2.48747	2.54701		5790	3.16662	2.69962	2.67961	2.36361				5780	3.16226	3.16216
5800	3.17237	2.71249	2.49327	2.56005		5800	3.17018	2.70932	2.68616	2.35461				5790	3.15552	3.16662
5810	3.16529	2.7098	2.48983	2.5487		5810	3.17212	2.71973	2.68404	2.35025				5800	3.17237	3.17018
5820	3.17403	2.72128	2.49197	2.5561		5820	3.17897	2.72107	2.69692	2.35247				5810	3.16529	3.17212
5830	3.1678	2.71416	2.49582	2.54442		5830	3.17245	2.71288	2.68518	2.35774				5820	3.17403	3.17897
5840	3.16778	2.71562	2.49785	2.54083		5840	3.16383	2.7029	2.67276	2.36016				5830	3.1678	3.17245
5850	3.17035	2.71922	2.49639	2.54482		5850	3.15821	2.69294	2.66865	2.36114				5840	3.16778	3.16383
5860	3.17247	2.71914	2.49051	2.55594		5860	3.16559	2.70922	2.67301	2.35733				5850	3.17035	3.15821
5870	3.17315	2.71943	2.48755	2.56018		5870	3.17911	2.72858	2.685	2.35777				5860	3.17247	3.16559
5880	3.17442	2.72825	2.48593	2.55552		5880	3.1706	2.72569	2.67834	2.34574				5870	3.17315	3.17911
5890	3.17016	2.72262	2.49059	2.54641		5890	3.16889	2.73113	2.67892	2.33409				5880	3.17442	3.1706
5900	3.17147	2.71695	2.49419	2.55219		5900	3.16895	2.73464	2.68122	2.32751				5890	3.17016	3.16889
5910	3.16045	2.70762	2.49296	2.53591		5910	3.18205	2.74409	2.68956	2.34246				5900	3.17147	3.16895
5920	3.17524	2.72556	2.49943	2.54724		5920	3.18127	2.73919	2.69015	2.34538				5910	3.16045	3.18205
5930	3.17167	2.73226	2.48534	2.54495		5930	3.17456	2.73721	2.68058	2.34047				5920	3.17524	3.18127
5940	3.16838	2.73589	2.48625	2.53194		5940	3.16728	2.72666	2.67079	2.34425				5930	3.17167	3.17456
5950	3.16378	2.73394	2.49076	2.51806		5950	3.16242	2.71492	2.66682	2.34928				5940	3.16838	3.16728
5960	3.1703	2.74233	2.48729	2.52876		5960	3.1658	2.71624	2.6721	2.35085				5950	3.16378	3.16242
5970	3.17173	2.73121	2.50281	2.52906		5970	3.175	2.72213	2.67689	2.36335				5960	3.1703	3.1658
5980	3.16983	2.72136	2.51061	2.52718		5980	3.1708	2.71724	2.67931	2.35496				5970	3.17173	3.175
5990	3.16546	2.71203	2.50692	2.52993		5990	3.17031	2.72189	2.68029	2.34715				5980	3.16983	3.1708
6000	3.17207	2.72551	2.50369	2.53519		6000	3.16379	2.7162	2.67188	2.34573				5990	3.16546	3.17031
6010	3.17002	2.7247	2.5061	2.52853		6010	3.16655	2.72051	2.67735	2.34195				6000	3.17207	3.16379
6020	3.17291	2.71876	2.52149	2.52689		6020	3.16436	2.70788	2.66676	2.36265				6010	3.17002	3.16655
6030	3.17436	2.71606	2.52649	2.52844		6030	3.16593	2.70558	2.67307	2.36235				6020	3.17291	3.16436
6040	3.16617	2.70429	2.53313	2.51383		6040	3.16915	2.71201	2.691	2.34319				6030	3.17436	3.16593
6050	3.17601	2.71626	2.54202	2.51679		6050	3.16426	2.69604	2.68598	2.35414				6040	3.16617	3.16915
6060	3.17722	2.7123	2.54897	2.51706		6060	3.16423	2.68869	2.68933	2.35863				6050	3.17601	3.16426
6070	3.17449	2.7045	2.5472	2.52035		6070	3.17332	2.68892	2.69575	2.3754				6060	3.17722	3.16423
6080	3.18009	2.71105	2.54521	2.52944		6080	3.1762	2.68915	2.69775	2.38057				6070	3.17449	3.17332
6090	3.17996	2.70873	2.54435	2.53246		6090	3.16336	2.68056	2.68695	2.36824				6080	3.18009	3.1762
6100	3.19102	2.71649	2.54726	2.549		6100	3.17473	2.69365	2.69135	2.3788				6090	3.17996	3.16336
6110	3.18895	2.71673	2.53327	2.55747		6110	3.1761	2.6992	2.69061	2.377				6100	3.19102	3.17473
6120	3.18764	2.72006	2.52857	2.55534		6120	3.18202	2.7002	2.70138	2.37948				6110	3.18895	3.1761
6130	3.17588	2.70542	2.5193	2.55073		6130	3.18031	2.70636	2.70174	2.36749				6120	3.18764	3.18202
6140	3.1787	2.70661	2.5241	2.55175		6140	3.18283	2.69655	2.7039	2.38294				6130	3.17588	3.18031
6150	3.18398	2.71091	2.52659	2.55788		6150	3.18056	2.70609	2.69869	2.37193				6140	3.1787	3.18283
6160	3.17798	2.69589	2.51658	2.56867		6160	3.17491	2.69605	2.69417	2.37335				6150	3.18398	3.18056
6170	3.16811	2.68735	2.51684	2.55293		6170	3.17881	2.69587	2.7002	2.37717				6160	3.17798	3.17491
6180	3.17602	2.70205	2.5195	2.55446		6180	3.17372	2.68954	2.69187	2.38016				6170	3.16811	3.17881
6190	3.17363	2.69529	2.51883	2.55631		6190	3.1749	2.68878	2.6888	2.38763				6180	3.17602	3.17372
6200	3.17778	2.70125	2.51553	2.56357		6200	3.17537	2.69137	2.68959	2.38508				6190	3.17363	3.1749
6210	3.17982	2.70886	2.51664	2.55951		6210	3.17186	2.67554	2.68226	2.40173				6200	3.17778	3.17537
6220	3.17844	2.70654	2.5262	2.54911		6220	3.17764	2.67174	2.68492	2.41822				6210	3.17982	3.17186
6230	3.17442	2.70708	2.52403	2.54064		6230	3.1769	2.66842	2.68113	2.42415				6220	3.17844	3.17764
6240	3.16583	2.71202	2.51595	2.5219		6240	3.17929	2.66282	2.67879	2.43912				6230	3.17442	3.1769
6250	3.16391	2.71645	2.50997	2.51825		6250	3.18747	2.67462	2.68334	2.44255				6240	3.16583	3.17929
6260	3.1705	2.72306	2.5081	2.52952		6260	3.1703	2.65957	2.66581	2.43347				6250	3.16391	3.18747
6270	3.17364	2.72704	2.51666	2.5246		6270	3.17513	2.66593	2.66988	2.43462				6260	3.1705	3.1703
6280	3.16739	2.72378	2.51386	2.51519		6280	3.18468	2.66574	2.67692	2.45201				6270	3.17364	3.17513
6290	3.17423	2.73015	2.51992	2.51947		6290	3.16927	2.64777	2.65941	2.45058				6280	3.16739	3.18468
6300	3.17082	2.72747	2.51946	2.51424		6300	3.17174	2.6467	2.66359	2.4536				6290	3.17423	3.16927
6310	3.17641	2.74174	2.51729	2.51502		6310	3.17149	2.64129	2.67172	2.44994				6300	3.17082	3.17174
6320	3.16817	2.72864	2.52806	2.4976		6320	3.17607	2.64696	2.67489	2.45222				6310	3.17641	3.17149
6330	3.17468	2.73497	2.5246	2.51069		6330	3.17969	2.64707	2.68042	2.45543				6320	3.16817	3.17607
6340	3.16894	2.73805	2.52138	2.496		6340	3.18173	2.65597	2.67961	2.45202				6330	3.17468	3.17969
6350	3.1689	2.741	2.52536	2.48864		6350	3.18045	2.65583	2.68154	2.44674				6340	3.16894	3.18173
6360	3.17682	2.75658	2.52738	2.48958		6360	3.16727	2.6528	2.66754	2.43107				6350	3.1689	3.18045
6370	3.17218	2.75012	2.53359	2.47856		6370	3.18142	2.66779	2.67578	2.44253				6360	3.17682	3.16727
6380	3.165	2.7356	2.53387	2.47597		6380	3.18435	2.67413	2.67513	2.44395				6370	3.17218	3.18142
6390	3.16906	2.74309	2.53809	2.47376		6390	3.18389	2.67368	2.68194	2.43576				6380	3.165	3.18435
6400	3.17271	2.74495	2.5479	2.47095		6400	3.17348	2.66996	2.66983	2.42597				6390	3.16906	3.18389
6410	3.17133	2.75614	2.53316	2.47012		6410	3.18126	2.67781	2.68124	2.42512				6400	3.17271	3.17348
6420	3.16399	2.74126	2.53946	2.46136		6420	3.16698	2.66449	2.66588	2.41933				6410	3.17133	3.18126
6430	3.17469	2.74718	2.5516	2.46976		6430	3.16185	2.66891	2.65653	2.41131				6420	3.16399	3.16698
6440	3.16893	2.7383	2.55622	2.46001		6440	3.16565	2.67839	2.65734	2.40987				6430	3.17469	3.16185
6450	3.1678	2.73745	2.55755	2.45668		6450	3.16602	2.67241	2.65878	2.41589				6440	3.16893	3.16565
6460	3.17442	2.73356	2.56292	2.47246		6460	3.17426	2.67885	2.67428	2.41325				6450	3.1678	3.16602
6470	3.1578	2.71456	2.55092	2.46321		6470	3.16302	2.67599	2.66758	2.39426				6460	3.17442	3.17426
6480	3.16719	2.72933	2.55646	2.46526		6480	3.16233	2.68192	2.65787	2.39659				6470	3.1578	3.16302
6490	3.15405	2.71331	2.55623	2.44943		6490	3.16904	2.67944	2.67654	2.39632				6480	3.16719	3.16233
6500	3.16984	2.73185	2.56315	2.46231		6500	3.16633	2.65788	2.67556	2.4142				6490	3.15405	3.16904
6510	3.15833	2.71762	2.55524	2.4567		6510	3.16793	2.65703	2.67743	2.41724				6500	3.16984	3.16633
6520	3.16612	2.71763	2.57531	2.45578		6520	3.16939	2.65794	2.68094	2.4162				6510	3.15833	3.16793
6530	3.16127	2.71498	2.57068	2.45106		6530	3.17051	2.65899	2.68192	2.41688				6520	3.16612	3.16939
6540	3.16967	2.72429	2.57529	2.45759		6540	3.17713	2.66377	2.69113	2.41877				6530	3.16127	3.17051
6550	3.17094	2.72537	2.5713	2.46384		6550	3.16856	2.66208	2.68558	2.40426				6540	3.16967	3.17713
6560	3.16476	2.71952	2.56492	2.46105		6560	3.17211	2.66643	2.69383	2.39958				6550	3.17094	3.16856
6570	3.17514	2.73509	2.57221	2.46293		6570	3.16613	2.66086	2.68451	2.40041				6560	3.16476	3.17211
6580	3.15687	2.71836	2.55737	2.4499		6580	3.17616	2.67091	2.69533	2.40363				6570	3.17514	3.16613
6590	3.15879	2.72096	2.5573	2.45203		6590	3.16796	2.66824	2.68037	2.40168				6580	3.15687	3.17616
6600	3.16721	2.72414	2.5692	2.45779		6600	3.17567	2.66942	2.69498	2.40437				6590	3.15879	3.16796
6610	3.17602	2.73017	2.58552	2.45671		6610	3.17087	2.66925	2.68277	2.40554				6600	3.16721	3.17567
6620	3.164	2.72026	2.56976	2.45321		6620	3.17686	2.67217	2.69176	2.40808				6610	3.17602	3.17087
6630	3.15681	2.71534	2.56291	2.44732		6630	3.17458	2.67056	2.69095	2.40475				6620	3.164	3.17686
6640	3.16157	2.72343	2.56444	2.449		6640	3.16954	2.66847	2.67082	2.41619				6630	3.15681	3.17458
6650	3.15919	2.72134	2.56591	2.44364		6650	3.17764	2.67826	2.68138	2.41494				6640	3.16157	3.16954
6660	3.16121	2.72557	2.56408	2.44605		6660	3.18067	2.68846	2.68472	2.40786				6650	3.15919	3.17764
6670	3.16095	2.72409	2.56297	2.44822		6670	3.17988	2.68456	2.68962	2.40465				6660	3.16121	3.18067
6680	3.16195	2.71546	2.5591	2.46438		6680	3.17407	2.6798	2.68147	2.40372				6670	3.16095	3.17988
6690	3.16818	2.72263	2.55876	2.47281		6690	3.17394	2.68043	2.67754	2.40705				6680	3.16195	3.17407
6700	3.1652	2.71716	2.55563	2.47443		6700	3.18235	2.69077	2.68341	2.41117				6690	3.16818	3.17394
6710	3.1552	2.71655	2.54668	2.45874		6710	3.18147	2.68812	2.68033	2.41522				6700	3.1652	3.18235
6720	3.17017	2.73606	2.55121	2.47089		6720	3.17719	2.68248	2.68531	2.40468				6710	3.1552	3.18147
6730	3.16804	2.73788	2.54585	2.46892		6730	3.17832	2.69039	2.68238	2.40209				6720	3.17017	3.17719
6740	3.16686	2.7533	2.53105	2.46397		6740	3.18045	2.68455	2.69493	2.40024				6730	3.16804	3.17832
6750	3.17657	2.77112	2.53613	2.46376		6750	3.16739	2.6747	2.67735	2.39635				6740	3.16686	3.18045
6760	3.17318	2.77358	2.53987	2.44836		6760	3.16842	2.68619	2.66925	2.39525				6750	3.17657	3.16739
6770	3.17272	2.76561	2.54567	2.45016		6770	3.17327	2.69662	2.67346	2.39169				6760	3.17318	3.16842
6780	3.17201	2.76416	2.54989	2.44556		6780	3.18523	2.71621	2.68787	2.38514				6770	3.17272	3.17327
6790	3.16554	2.75302	2.54619	2.44523		6790	3.17897	2.71557	2.6804	2.37757				6780	3.17201	3.18523
6800	3.17472	2.74594	2.55476	2.46794		6800	3.17131	2.70934	2.6751	2.37018				6790	3.16554	3.17897
6810	3.17351	2.74397	2.55739	2.46429		6810	3.16926	2.71554	2.67588	2.35669				6800	3.17472	3.17131
6820	3.17001	2.75353	2.54589	2.4565		6820	3.18552	2.73138	2.68924	2.36698				6810	3.17351	3.16926
6830	3.17934	2.76761	2.54888	2.46169		6830	3.17627	2.72413	2.68518	2.35505				6820	3.17001	3.18552
6840	3.1776	2.76441	2.55685	2.45252		6840	3.18535	2.7332	2.69797	2.35447				6830	3.17934	3.17627
6850	3.17651	2.76998	2.55097	2.44952		6850	3.16993	2.72155	2.67884	2.34816				6840	3.1776	3.18535
6860	3.16753	2.7598	2.5436	2.44544		6860	3.17314	2.73286	2.6742	2.34899				6850	3.17651	3.16993
6870	3.16425	2.75801	2.54435	2.43814		6870	3.16962	2.73299	2.67589	2.33737				6860	3.16753	3.17314
6880	3.15498	2.75602	2.54346	2.41724		6880	3.17805	2.73534	2.68694	2.34483				6870	3.16425	3.16962
6890	3.15289	2.74645	2.55075	2.41497		6890	3.17946	2.73903	2.68601	2.34542				6880	3.15498	3.17805
6900	3.16676	2.7647	2.55584	2.42505		6900	3.18132	2.73738	2.68726	2.35095				6890	3.15289	3.17946
6910	3.16578	2.76318	2.54938	2.43102		6910	3.18618	2.74158	2.68951	2.35664				6900	3.16676	3.18132
6920	3.16344	2.75789	2.54351	2.43707		6920	3.18476	2.72731	2.69269	2.36572				6910	3.16578	3.18618
6930	3.17203	2.76488	2.54626	2.44857		6930	3.17959	2.72447	2.69005	2.35808				6920	3.16344	3.18476
6940	3.17452	2.76606	2.55821	2.44123		6940	3.17958	2.7302	2.69056	2.35083				6930	3.17203	3.17959
6950	3.17676	2.76426	2.56018	2.44702		6950	3.17699	2.72654	2.69058	2.34804				6940	3.17452	3.17958
6960	3.17919	2.77531	2.56219	2.43873		6960	3.18546	2.72644	2.68827	2.37361				6950	3.17676	3.17699
6970	3.1737	2.77641	2.55823	2.42728		6970	3.18936	2.72188	2.69258	2.38442				6960	3.17919	3.18546
6980	3.16912	2.76555	2.57158	2.41358		6980	3.18374	2.70935	2.69237	2.3839				6970	3.1737	3.18936
6990	3.17332	2.7687	2.57371	2.41873		6990	3.19136	2.70442	2.70475	2.39584				6980	3.16912	3.18374
7000	3.16671	2.75851	2.56139	2.42612		7000	3.18737	2.69759	2.70496	2.39266				6990	3.17332	3.19136
7010	3.16003	2.76054	2.54935	2.41906		7010	3.18771	2.69562	2.70166	2.39951				7000	3.16671	3.18737
7020	3.15485	2.75421	2.55206	2.40988		7020	3.17474	2.68552	2.68708	2.3928				7010	3.16003	3.18771
7030	3.17898	2.76859	2.5729	2.43453		7030	3.18054	2.69067	2.69494	2.3936				7020	3.15485	3.17474
7040	3.17078	2.7676	2.56842	2.41895		7040	3.18917	2.69367	2.70604	2.40064				7030	3.17898	3.18054
7050	3.17516	2.76686	2.57211	2.42736		7050	3.19285	2.69715	2.7023	2.41073				7040	3.17078	3.18917
7060	3.16752	2.75938	2.56706	2.42123		7060	3.18718	2.68442	2.70536	2.40647				7050	3.17516	3.19285
7070	3.17728	2.75928	2.5713	2.44233		7070	3.17989	2.7025	2.69125	2.38268				7060	3.16752	3.18718
7080	3.17764	2.76515	2.56762	2.4405		7080	3.1767	2.71425	2.68675	2.36583				7070	3.17728	3.17989
7090	3.17501	2.76828	2.56394	2.43397		7090	3.18134	2.71425	2.68973	2.37489				7080	3.17764	3.1767
7100	3.17853	2.76173	2.5723	2.44177		7100	3.17865	2.70871	2.67994	2.38505				7090	3.17501	3.18134
7110	3.17364	2.74829	2.56577	2.45106		7110	3.18029	2.71541	2.68121	2.38038				7100	3.17853	3.17865
7120	3.18037	2.74685	2.57201	2.46354		7120	3.17325	2.70174	2.68383	2.37417				7110	3.17364	3.18029
7130	3.18419	2.75013	2.57901	2.46243		7130	3.18367	2.71221	2.69047	2.3826				7120	3.18037	3.17325
7140	3.18924	2.75297	2.57463	2.47689		7140	3.18436	2.70529	2.69298	2.38948				7130	3.18419	3.18367
7150	3.18207	2.74497	2.58005	2.46164		7150	3.18982	2.70624	2.70391	2.39062				7140	3.18924	3.18436
7160	3.18835	2.74266	2.58765	2.47245		7160	3.19074	2.70194	2.6996	2.40276				7150	3.18207	3.18982
7170	3.18299	2.73342	2.59424	2.46193		7170	3.19247	2.70277	2.70397	2.40152				7160	3.18835	3.19074
7180	3.17547	2.71938	2.58217	2.47074		7180	3.19263	2.69537	2.70366	2.41059				7170	3.18299	3.19247
7190	3.18072	2.71901	2.58447	2.48224		7190	3.19013	2.68893	2.70516	2.40949				7180	3.17547	3.19263
7200	3.18673	2.72015	2.57984	2.50114		7200	3.19913	2.69513	2.71162	2.41915				7190	3.18072	3.19013
7210	3.18396	2.72343	2.57608	2.49438		7210	3.19153	2.69603	2.70287	2.40784				7200	3.18673	3.19913
7220	3.17656	2.70994	2.57366	2.49271		7220	3.18908	2.69995	2.70323	2.39651				7210	3.18396	3.19153
7230	3.18494	2.71214	2.57751	2.50766		7230	3.1916	2.70596	2.70802	2.39104				7220	3.17656	3.18908
7240	3.18083	2.7008	2.58507	2.50169		7240	3.19332	2.71855	2.70898	2.38024				7230	3.18494	3.1916
7250	3.17749	2.69692	2.5817	2.50087		7250	3.18544	2.71285	2.69644	2.37985				7240	3.18083	3.19332
7260	3.17928	2.69948	2.58403	2.50024		7260	3.19128	2.71695	2.70419	2.38203				7250	3.17749	3.18544
7270	3.16788	2.69319	2.57947	2.48274		7270	3.18191	2.71239	2.69432	2.37331				7260	3.17928	3.19128
7280	3.17547	2.69287	2.58033	2.50152		7280	3.18833	2.71024	2.7049	2.38097				7270	3.16788	3.18191
7290	3.18763	2.70422	2.58715	2.51312		7290	3.19458	2.71863	2.71637	2.37508				7280	3.17547	3.18833
7300	3.19044	2.70591	2.60039	2.50475		7300	3.18396	2.71269	2.70098	2.37093				7290	3.18763	3.19458
7310	3.18455	2.71499	2.58963	2.49105		7310	3.17328	2.708	2.6904	2.35963				7300	3.19044	3.18396
7320	3.18631	2.72708	2.59007	2.48189		7320	3.18622	2.71394	2.69818	2.37873				7310	3.18455	3.17328
7330	3.19526	2.7386	2.59112	2.49111		7330	3.17952	2.70307	2.7053	2.36505				7320	3.18631	3.18622
7340	3.18172	2.72657	2.57592	2.48539		7340	3.17843	2.71677	2.70122	2.35106				7330	3.19526	3.17952
7350	3.17291	2.71533	2.57401	2.47713		7350	3.18376	2.71819	2.70478	2.35971				7340	3.18172	3.17843
7360	3.17007	2.72945	2.56847	2.46003		7360	3.17785	2.7028	2.69402	2.37374				7350	3.17291	3.18376
7370	3.17179	2.72782	2.56628	2.46854		7370	3.18089	2.69937	2.69511	2.38453				7360	3.17007	3.17785
7380	3.17424	2.71868	2.57098	2.48		7380	3.18397	2.70326	2.70051	2.38222				7370	3.17179	3.18089
7390	3.17375	2.72601	2.57343	2.46812		7390	3.1837	2.70547	2.69424	2.38606				7380	3.17424	3.18397
7400	3.17929	2.73086	2.56506	2.48567		7400	3.18143	2.71538	2.69296	2.37018				7390	3.17375	3.1837
7410	3.17281	2.71468	2.57435	2.47722		7410	3.17449	2.71415	2.68423	2.36285				7400	3.17929	3.18143
7420	3.183	2.72401	2.58204	2.48511		7420	3.17616	2.72306	2.68658	2.35442				7410	3.17281	3.17449
7430	3.18189	2.72061	2.58059	2.48751		7430	3.17826	2.71787	2.69158	2.36037				7420	3.183	3.17616
7440	3.18093	2.72007	2.58039	2.48584		7440	3.18025	2.72076	2.69297	2.36079				7430	3.18189	3.17826
7450	3.18049	2.71719	2.58419	2.48393		7450	3.18205	2.72261	2.68878	2.36827				7440	3.18093	3.18025
7460	3.17593	2.70425	2.58551	2.485		7460	3.17471	2.72157	2.67511	2.36527				7450	3.18049	3.18205
7470	3.17954	2.70996	2.5896	2.48376		7470	3.17577	2.73027	2.68084	2.35155				7460	3.17593	3.17471
7480	3.17816	2.71089	2.58597	2.48298		7480	3.17889	2.72825	2.68785	2.35431				7470	3.17954	3.17577
7490	3.17702	2.69329	2.59397	2.49086		7490	3.18347	2.73806	2.69655	2.34533				7480	3.17816	3.17889
7500	3.17698	2.69216	2.60094	2.4847		7500	3.17485	2.74061	2.68299	2.33451				7490	3.17702	3.18347
7510	3.17428	2.68624	2.5975	2.48781		7510	3.19016	2.75259	2.70733	2.33407				7500	3.17698	3.17485
7520	3.18039	2.68362	2.59732	2.50636		7520	3.18873	2.76289	2.69715	2.32976				7510	3.17428	3.19016
7530	3.18158	2.67302	2.6043	2.51347		7530	3.1844	2.77077	2.69359	2.31262				7520	3.18039	3.18873
7540	3.18819	2.67838	2.60926	2.51936		7540	3.17634	2.7579	2.68199	2.3193				7530	3.18158	3.1844
7550	3.186	2.67928	2.61383	2.5081		7550	3.18428	2.76166	2.69561	2.32083				7540	3.18819	3.17634
7560	3.18253	2.67709	2.61354	2.50192		7560	3.17752	2.75563	2.69645	2.30845				7550	3.186	3.18428
7570	3.18335	2.68303	2.62359	2.48708		7570	3.18544	2.75715	2.70402	2.31959				7560	3.18253	3.17752
7580	3.19095	2.68719	2.62364	2.50197		7580	3.18172	2.76123	2.691	2.31964				7570	3.18335	3.18544
7590	3.19123	2.6897	2.62848	2.49489		7590	3.19444	2.76941	2.70041	2.3339				7580	3.19095	3.18172
7600	3.19293	2.69241	2.62392	2.50112		7600	3.18049	2.75227	2.69026	2.32777				7590	3.19123	3.19444
7610	3.18485	2.6898	2.61988	2.48752		7610	3.18415	2.76165	2.6902	2.32675				7600	3.19293	3.18049
7620	3.18068	2.69432	2.61138	2.48088		7620	3.17645	2.75776	2.68232	2.31939				7610	3.18485	3.18415
7630	3.18912	2.6915	2.62556	2.49064		7630	3.17659	2.76631	2.67822	2.31432				7620	3.18068	3.17645
7640	3.18923	2.69698	2.62266	2.48802		7640	3.18495	2.77773	2.68325	2.31779				7630	3.18912	3.17659
7650	3.18112	2.68893	2.6257	2.47274		7650	3.18036	2.77413	2.67964	2.31369				7640	3.18923	3.18495
7660	3.20013	2.70672	2.64083	2.48625		7660	3.19244	2.77801	2.69315	2.32658				7650	3.18112	3.18036
7670	3.19034	2.71155	2.63099	2.46615		7670	3.19436	2.78544	2.6935	2.32255				7660	3.20013	3.19244
7680	3.18244	2.69974	2.63259	2.45698		7680	3.19317	2.78154	2.70929	2.30552				7670	3.19034	3.19436
7690	3.17199	2.6881	2.61853	2.45774		7690	3.19244	2.7726	2.70697	2.31696				7680	3.18244	3.19317
7700	3.185	2.70107	2.63058	2.46428		7700	3.18521	2.76315	2.69246	2.32525				7690	3.17199	3.19244
7710	3.18994	2.69159	2.64005	2.47729		7710	3.18665	2.75787	2.70258	2.32372				7700	3.185	3.18521
7720	3.17889	2.67746	2.63419	2.47039		7720	3.19271	2.76598	2.70195	2.33144				7710	3.18994	3.18665
7730	3.17579	2.6704	2.64097	2.46284		7730	3.18995	2.77186	2.69919	2.32006				7720	3.17889	3.19271
7740	3.18208	2.67186	2.63784	2.48078		7740	3.18894	2.76434	2.70927	2.31452				7730	3.17579	3.18995
7750	3.19523	2.6796	2.65773	2.485		7750	3.19416	2.77831	2.71557	2.30479				7740	3.18208	3.18894
7760	3.17661	2.66006	2.6414	2.47563		7760	3.18169	2.76309	2.70088	2.30583				7750	3.19523	3.19416
7770	3.19068	2.66466	2.65652	2.49067		7770	3.18234	2.76707	2.70283	2.30057				7760	3.17661	3.18169
7780	3.18141	2.66272	2.65256	2.47317		7780	3.18359	2.7733	2.69815	2.30202				7770	3.19068	3.18234
7790	3.17968	2.66547	2.65386	2.46436		7790	3.18898	2.78113	2.70619	2.29807				7780	3.18141	3.18359
7800	3.1848	2.66958	2.659	2.46758		7800	3.18321	2.78216	2.69394	2.29519				7790	3.17968	3.18898
7810	3.18216	2.66161	2.65583	2.4728		7810	3.19895	2.79231	2.7076	2.31052				7800	3.1848	3.18321
7820	3.17975	2.66773	2.65902	2.45652		7820	3.18309	2.77083	2.69327	2.30932				7810	3.18216	3.19895
7830	3.18458	2.6811	2.66132	2.45198		7830	3.18739	2.76122	2.70203	2.32243				7820	3.17975	3.18309
7840	3.17083	2.67153	2.6445	2.44498		7840	3.18199	2.75763	2.70093	2.31314				7830	3.18458	3.18739
7850	3.17376	2.67415	2.65399	2.43941		7850	3.18312	2.755	2.70166	2.31851				7840	3.17083	3.18199
7860	3.17296	2.66266	2.65508	2.44871		7860	3.19078	2.7686	2.70664	2.31755				7850	3.17376	3.18312
7870	3.18442	2.66327	2.66916	2.46244		7870	3.17904	2.75543	2.6979	2.31116				7860	3.17296	3.19078
7880	3.18156	2.65968	2.66644	2.46189		7880	3.17303	2.74852	2.6968	2.30417				7870	3.18442	3.17904
7890	3.1872	2.66729	2.66635	2.46832		7890	3.18287	2.75086	2.70327	2.32087				7880	3.18156	3.17303
7900	3.17792	2.65293	2.65398	2.4732		7900	3.18571	2.76106	2.70069	2.31955				7890	3.1872	3.18287
7910	3.17608	2.653	2.65591	2.4663		7910	3.19458	2.77814	2.71097	2.31153				7900	3.17792	3.18571
7920	3.17634	2.65424	2.64938	2.47267		7920	3.18328	2.77277	2.6976	2.30244				7910	3.17608	3.19458
7930	3.17846	2.67098	2.64255	2.46739		7930	3.18172	2.77603	2.70173	2.28934				7920	3.17634	3.18328
7940	3.18284	2.6617	2.64371	2.48739		7940	3.17873	2.77314	2.69809	2.28882				7930	3.17846	3.18172
7950	3.19349	2.6859	2.651	2.48091		7950	3.18721	2.78042	2.70525	2.2951				7940	3.18284	3.17873
7960	3.19132	2.67773	2.66085	2.4736		7960	3.17154	2.76879	2.68355	2.29122				7950	3.19349	3.18721
7970	3.18121	2.67426	2.6507	2.46219		7970	3.181	2.77817	2.70075	2.28588				7960	3.19132	3.17154
7980	3.18288	2.67406	2.65278	2.46446		7980	3.1772	2.77901	2.69299	2.28345				7970	3.18121	3.181
7990	3.18358	2.67977	2.65429	2.45845		7990	3.18684	2.79527	2.70565	2.27547				7980	3.18288	3.1772
8000	3.18424	2.67995	2.65455	2.45968		8000	3.17986	2.79418	2.69514	2.26976				7990	3.18358	3.18684
8010	3.18793	2.66936	2.6588	2.4761		8010	3.1831	2.79943	2.69724	2.26989				8000	3.18424	3.17986
8020	3.18852	2.65954	2.66377	2.48285		8020	3.18726	2.80268	2.69918	2.27523				8010	3.18793	3.1831
8030	3.19033	2.67029	2.66359	2.47612		8030	3.17719	2.79135	2.68319	2.27989				8020	3.18852	3.18726
8040	3.19811	2.67636	2.66816	2.48471		8040	3.18324	2.79003	2.68278	2.2988				8030	3.19033	3.17719
8050	3.18738	2.66749	2.66335	2.47182		8050	3.18689	2.79698	2.68004	2.30367				8040	3.19811	3.18324
8060	3.18747	2.67901	2.65442	2.4692		8060	3.18236	2.79207	2.68503	2.29123				8050	3.18738	3.18689
8070	3.19327	2.67619	2.66319	2.47776		8070	3.18988	2.79939	2.69095	2.29627				8060	3.18747	3.18236
8080	3.18761	2.67717	2.65363	2.47239		8080	3.18983	2.80276	2.68193	2.30256				8070	3.19327	3.18988
8090	3.18446	2.67632	2.64422	2.47529		8090	3.20748	2.82287	2.70248	2.30302				8080	3.18761	3.18983
8100	3.18058	2.67528	2.64185	2.46894		8100	3.19709	2.82097	2.69107	2.28978				8090	3.18446	3.20748
8110	3.19067	2.66648	2.65145	2.49408		8110	3.19467	2.82929	2.69424	2.26894				8100	3.18058	3.19709
8120	3.18926	2.67354	2.64102	2.49398		8120	3.19687	2.83742	2.69525	2.26376				8110	3.19067	3.19467
8130	3.1931	2.68016	2.65335	2.4836		8130	3.1975	2.83926	2.70333	2.25358				8120	3.18926	3.19687
8140	3.191	2.67681	2.64707	2.48852		8140	3.19705	2.84238	2.68894	2.26555				8130	3.1931	3.1975
8150	3.18635	2.67168	2.64223	2.48724		8150	3.18598	2.82817	2.68226	2.26006				8140	3.191	3.19705
8160	3.19299	2.67933	2.65281	2.48479		8160	3.19337	2.837	2.69303	2.25706				8150	3.18635	3.18598
8170	3.1759	2.66773	2.63879	2.46833		8170	3.18851	2.83447	2.68828	2.25213				8160	3.19299	3.19337
8180	3.19418	2.67403	2.65794	2.48806		8180	3.19358	2.84548	2.69453	2.24513				8170	3.1759	3.18851
8190	3.19201	2.66969	2.65911	2.48592		8190	3.19404	2.8473	2.6933	2.24563				8180	3.19418	3.19358
8200	3.19755	2.67425	2.65699	2.49749		8200	3.18155	2.83432	2.67487	2.24859				8190	3.19201	3.19404
8210	3.18987	2.66659	2.65532	2.48778		8210	3.19032	2.84318	2.68199	2.25377				8200	3.19755	3.18155
8220	3.19828	2.69084	2.6456	2.49363		8220	3.18876	2.83858	2.686	2.25037				8210	3.18987	3.19032
8230	3.2074	2.68882	2.65925	2.50468		8230	3.19414	2.85023	2.68917	2.24714				8220	3.19828	3.18876
8240	3.20118	2.68693	2.65611	2.4941		8240	3.19222	2.84712	2.67753	2.25948				8230	3.2074	3.19414
8250	3.19476	2.68686	2.65585	2.47795		8250	3.17976	2.83627	2.67822	2.23705				8240	3.20118	3.19222
8260	3.19609	2.67983	2.66238	2.48198		8260	3.18351	2.84437	2.6835	2.23112				8250	3.19476	3.17976
8270	3.20795	2.69604	2.67604	2.48034		8270	3.18321	2.84066	2.67925	2.24006				8260	3.19609	3.18351
8280	3.20772	2.69771	2.67095	2.4834		8280	3.18388	2.83807	2.67819	2.24652				8270	3.20795	3.18321
8290	3.20716	2.69477	2.66371	2.49291		8290	3.18525	2.83708	2.68345	2.24537				8280	3.20772	3.18388
8300	3.19976	2.67524	2.66173	2.49703		8300	3.17602	2.82773	2.67497	2.24113				8290	3.20716	3.18525
8310	3.20121	2.6639	2.65218	2.52291		8310	3.17521	2.82754	2.68139	2.23137				8300	3.19976	3.17602
8320	3.20534	2.66759	2.66304	2.51804		8320	3.17466	2.82238	2.68235	2.23518				8310	3.20121	3.17521
8330	3.19909	2.66721	2.65724	2.50867		8330	3.18223	2.82749	2.68756	2.244				8320	3.20534	3.17466
8340	3.19533	2.67127	2.65218	2.5001		8340	3.17402	2.8132	2.67309	2.25595				8330	3.19909	3.18223
8350	3.19803	2.67781	2.65114	2.50113		8350	3.17783	2.81385	2.68175	2.25559				8340	3.19533	3.17402
8360	3.20402	2.69103	2.65166	2.50171		8360	3.17442	2.80439	2.68072	2.25899				8350	3.19803	3.17783
8370	3.20371	2.68731	2.65711	2.49911		8370	3.17795	2.80536	2.67977	2.26882				8360	3.20402	3.17442
8380	3.19741	2.68555	2.65525	2.48683		8380	3.18094	2.80983	2.68347	2.26728				8370	3.20371	3.17795
8390	3.18302	2.68911	2.63433	2.46823		8390	3.18303	2.81637	2.68928	2.25813				8380	3.19741	3.18094
8400	3.18666	2.70064	2.62852	2.47123		8400	3.18523	2.83083	2.69276	2.24205				8390	3.18302	3.18303
8410	3.18871	2.69965	2.64204	2.46318		8410	3.18653	2.83373	2.69397	2.24065				8400	3.18666	3.18523
8420	3.19129	2.70398	2.63782	2.46963		8420	3.17809	2.82708	2.68496	2.23586				8410	3.18871	3.18653
8430	3.18906	2.69778	2.6396	2.46875		8430	3.17728	2.82669	2.68067	2.23921				8420	3.19129	3.17809
8440	3.19781	2.70168	2.6496	2.47639		8440	3.1747	2.82216	2.67039	2.24986				8430	3.18906	3.17728
8450	3.19083	2.69154	2.64511	2.47423		8450	3.18525	2.83141	2.67239	2.26562				8440	3.19781	3.1747
8460	3.19682	2.69915	2.65784	2.46774		8460	3.18069	2.83065	2.66726	2.25982				8450	3.19083	3.18525
8470	3.19964	2.69389	2.66025	2.47819		8470	3.17837	2.82146	2.66971	2.26187				8460	3.19682	3.18069
8480	3.19032	2.68078	2.65852	2.47021		8480	3.18431	2.83213	2.6699	2.26504				8470	3.19964	3.17837
8490	3.19404	2.68765	2.65409	2.47713		8490	3.18247	2.83168	2.67496	2.25441				8480	3.19032	3.18431
8500	3.19388	2.68642	2.65704	2.47488		8500	3.1842	2.8401	2.67023	2.25433				8490	3.19404	3.18247
8510	3.2073	2.69183	2.67365	2.48579		8510	3.18823	2.84504	2.6716	2.25786				8500	3.19388	3.1842
8520	3.19238	2.67496	2.66038	2.47984		8520	3.18553	2.83915	2.66739	2.26264				8510	3.2073	3.18823
8530	3.19464	2.67535	2.66427	2.48105		8530	3.19141	2.84471	2.67649	2.26146				8520	3.19238	3.18553
8540	3.18371	2.66891	2.64406	2.4815		8540	3.19113	2.84792	2.67598	2.25722				8530	3.19464	3.19141
8550	3.18869	2.66546	2.64731	2.49452		8550	3.17677	2.82673	2.66243	2.25938				8540	3.18371	3.19113
8560	3.19453	2.66067	2.65831	2.50286		8560	3.18398	2.83616	2.66373	2.26632				8550	3.18869	3.17677
8570	3.19274	2.66846	2.65395	2.49461		8570	3.18795	2.83517	2.67092	2.27024				8560	3.19453	3.18398
8580	3.19087	2.67791	2.64729	2.48674		8580	3.1772	2.8138	2.66005	2.27944				8570	3.19274	3.18795
8590	3.19785	2.69489	2.64589	2.48784		8590	3.18341	2.82238	2.66347	2.28218				8580	3.19087	3.1772
8600	3.1969	2.69775	2.64832	2.47969		8600	3.18576	2.82692	2.66653	2.27952				8590	3.19785	3.18341
8610	3.20382	2.71139	2.64994	2.48095		8610	3.18053	2.82088	2.66349	2.27595				8600	3.1969	3.18576
8620	3.20016	2.70715	2.64909	2.47704		8620	3.19036	2.81949	2.67718	2.28911				8610	3.20382	3.18053
8630	3.19628	2.7123	2.65071	2.45958		8630	3.18357	2.81223	2.66629	2.29184				8620	3.20016	3.19036
8640	3.19574	2.70902	2.64926	2.46336		8640	3.18894	2.81977	2.67506	2.28727				8630	3.19628	3.18357
8650	3.19686	2.71505	2.65462	2.45383		8650	3.1761	2.80875	2.66096	2.28155				8640	3.19574	3.18894
8660	3.19965	2.72656	2.65159	2.45164		8660	3.18112	2.83045	2.66442	2.26461				8650	3.19686	3.1761
8670	3.19547	2.72228	2.64467	2.45296		8670	3.18677	2.8372	2.66572	2.2705				8660	3.19965	3.18112
8680	3.18931	2.72494	2.63998	2.43898		8680	3.19365	2.84381	2.66061	2.28751				8670	3.19547	3.18677
8690	3.19411	2.73132	2.63801	2.44654		8690	3.18214	2.8298	2.64958	2.28561				8680	3.18931	3.19365
8700	3.18756	2.72043	2.63273	2.44728		8700	3.18716	2.839	2.65095	2.28659				8690	3.19411	3.18214
8710	3.19119	2.72345	2.63392	2.45207		8710	3.18631	2.83379	2.64432	2.29833				8700	3.18756	3.18716
8720	3.17911	2.72075	2.61276	2.4463		8720	3.1671	2.82136	2.61959	2.28882				8710	3.19119	3.18631
8730	3.18732	2.73667	2.61488	2.44767		8730	3.17932	2.83463	2.63391	2.28987				8720	3.17911	3.1671
8740	3.20114	2.75164	2.63357	2.44691		8740	3.18006	2.83125	2.62124	2.31055				8730	3.18732	3.17932
8750	3.19298	2.74021	2.62522	2.44738		8750	3.18224	2.83469	2.62454	2.3086				8740	3.20114	3.18006
8760	3.18586	2.74428	2.60963	2.44093		8760	3.17958	2.82805	2.62168	2.31266				8750	3.19298	3.18224
8770	3.19187	2.751	2.61857	2.43952		8770	3.18093	2.84049	2.62493	2.29739				8760	3.18586	3.17958
8780	3.19401	2.75758	2.61092	2.44587		8780	3.18756	2.85823	2.62069	2.29862				8770	3.19187	3.18093
8790	3.18901	2.75895	2.60643	2.43605		8790	3.1913	2.8632	2.62988	2.29231				8780	3.19401	3.18756
8800	3.18859	2.7632	2.59176	2.44574		8800	3.18236	2.8582	2.62115	2.28366				8790	3.18901	3.1913
8810	3.19222	2.76401	2.60346	2.44187		8810	3.19187	2.87285	2.63739	2.27308				8800	3.18859	3.18236
8820	3.18382	2.74942	2.60501	2.43476		8820	3.18841	2.87926	2.63193	2.26159				8810	3.19222	3.19187
8830	3.17894	2.74339	2.59843	2.43583		8830	3.18189	2.877	2.6276	2.2511				8820	3.18382	3.18841
8840	3.19798	2.76657	2.61343	2.44339		8840	3.1843	2.87938	2.63299	2.24856				8830	3.17894	3.18189
8850	3.18907	2.76709	2.59985	2.43399		8850	3.18853	2.88567	2.63969	2.24462				8840	3.19798	3.1843
8860	3.19109	2.77379	2.5954	2.43642		8860	3.1855	2.87891	2.63936	2.24511				8850	3.18907	3.18853
8870	3.18619	2.77052	2.59278	2.43008		8870	3.18921	2.88349	2.64095	2.24787				8860	3.19109	3.1855
8880	3.1845	2.77357	2.59047	2.42463		8880	3.19218	2.88158	2.64337	2.25592				8870	3.18619	3.18921
8890	3.18127	2.77992	2.5816	2.41834		8890	3.18027	2.87447	2.63296	2.24347				8880	3.1845	3.19218
8900	3.17984	2.78065	2.5752	2.42056		8900	3.18068	2.87606	2.63476	2.24048				8890	3.18127	3.18027
8910	3.19352	2.78727	2.59981	2.42265		8910	3.18963	2.88658	2.64073	2.24536				8900	3.17984	3.18068
8920	3.1841	2.77997	2.59878	2.4073		8920	3.18626	2.88211	2.63642	2.24659				8910	3.19352	3.18963
8930	3.18461	2.78178	2.59593	2.40963		8930	3.18925	2.88694	2.64452	2.23938				8920	3.1841	3.18626
8940	3.19474	2.79461	2.60616	2.41056		8940	3.1858	2.88695	2.64992	2.22308				8930	3.18461	3.18925
8950	3.19189	2.78725	2.61259	2.40458		8950	3.18555	2.88444	2.65117	2.22414				8940	3.19474	3.1858
8960	3.18929	2.77847	2.61521	2.405		8960	3.19035	2.89314	2.64772	2.23069				8950	3.19189	3.18555
8970	3.19703	2.78439	2.63054	2.40196		8970	3.18861	2.88775	2.64576	2.23504				8960	3.18929	3.19035
8980	3.19089	2.78608	2.6188	2.39649		8980	3.19115	2.89199	2.64866	2.23336				8970	3.19703	3.18861
8990	3.18915	2.78296	2.61992	2.39428		8990	3.18713	2.89494	2.63741	2.23137				8980	3.19089	3.19115
9000	3.18532	2.78828	2.61548	2.3827		9000	3.19302	2.89042	2.63093	2.2615				8990	3.18915	3.18713
9010	3.18794	2.78944	2.62223	2.38093		9010	3.1888	2.89066	2.62489	2.2563				9000	3.18532	3.19302
9020	3.1913	2.78974	2.63617	2.37417		9020	3.19246	2.89246	2.62089	2.26897				9010	3.18794	3.1888
9030	3.17436	2.76642	2.62955	2.36336		9030	3.19176	2.88964	2.62209	2.2692				9020	3.1913	3.19246
9040	3.18258	2.76828	2.63855	2.37325		9040	3.1932	2.894	2.62668	2.26238				9030	3.17436	3.19176
9050	3.18868	2.77245	2.65157	2.37024		9050	3.18581	2.88576	2.6226	2.2568				9040	3.18258	3.1932
9060	3.19096	2.76514	2.66423	2.37072		9060	3.19176	2.89116	2.62024	2.26939				9050	3.18868	3.18581
9070	3.18398	2.75711	2.66342	2.36219		9070	3.19052	2.89331	2.62126	2.262				9060	3.19096	3.19176
9080	3.1872	2.7666	2.66762	2.35503		9080	3.19928	2.90237	2.63644	2.25747				9070	3.18398	3.19052
9090	3.1928	2.77112	2.67023	2.36193		9090	3.19754	2.90267	2.63343	2.25568				9080	3.1872	3.19928
9100	3.19651	2.78861	2.66446	2.35788		9100	3.18563	2.89312	2.61932	2.25067				9090	3.1928	3.19754
9110	3.19883	2.79859	2.66245	2.35463		9110	3.19337	2.89554	2.63142	2.25538				9100	3.19651	3.18563
9120	3.18984	2.78814	2.6506	2.35601		9120	3.19195	2.89686	2.62677	2.25507				9110	3.19883	3.19337
9130	3.19149	2.79072	2.65517	2.35228		9130	3.19121	2.89342	2.62954	2.25417				9120	3.18984	3.19195
9140	3.18551	2.78913	2.65218	2.34129		9140	3.18636	2.88756	2.61503	2.26482				9130	3.19149	3.19121
9150	3.1923	2.8021	2.65745	2.33833		9150	3.18169	2.88723	2.61349	2.25385				9140	3.18551	3.18636
9160	3.19843	2.81687	2.64756	2.34852		9160	3.18036	2.89024	2.60772	2.25293				9150	3.1923	3.18169
9170	3.18341	2.79344	2.64643	2.33694		9170	3.1809	2.898	2.61112	2.24052				9160	3.19843	3.18036
9180	3.18563	2.8005	2.6492	2.3314		9180	3.18333	2.90049	2.60689	2.2491				9170	3.18341	3.1809
9190	3.18631	2.79972	2.65421	2.32849		9190	3.19993	2.91898	2.62309	2.25347				9180	3.18563	3.18333
9200	3.17266	2.78725	2.6449	2.31675		9200	3.1938	2.91457	2.60714	2.26027				9190	3.18631	3.19993
9210	3.17823	2.79008	2.64568	2.32769		9210	3.18336	2.90559	2.61016	2.23881				9200	3.17266	3.1938
9220	3.18551	2.80417	2.65092	2.3247		9220	3.18922	2.91787	2.62108	2.2267				9210	3.17823	3.18336
9230	3.18741	2.80731	2.64677	2.33083		9230	3.18958	2.92174	2.61827	2.22598				9220	3.18551	3.18922
9240	3.17791	2.7934	2.63816	2.33135		9240	3.19374	2.92548	2.62641	2.22341				9230	3.18741	3.18958
9250	3.18768	2.79752	2.6509	2.33864		9250	3.19137	2.92453	2.63105	2.21233				9240	3.17791	3.19374
9260	3.18662	2.79864	2.64917	2.33637		9260	3.19409	2.93398	2.62585	2.21385				9250	3.18768	3.19137
9270	3.18427	2.79825	2.65092	2.32844		9270	3.18662	2.92725	2.61824	2.21024				9260	3.18662	3.19409
9280	3.18565	2.80259	2.64819	2.33009		9280	3.18849	2.92801	2.62497	2.20662				9270	3.18427	3.18662
9290	3.18679	2.80618	2.65579	2.32021		9290	3.20353	2.94756	2.63503	2.21217				9280	3.18565	3.18849
9300	3.17567	2.79364	2.65223	2.3089		9300	3.19498	2.93727	2.62896	2.20835				9290	3.18679	3.20353
9310	3.18788	2.80796	2.65556	2.32133		9310	3.19895	2.94315	2.63272	2.20753				9300	3.17567	3.19498
9320	3.17887	2.79476	2.64968	2.31927		9320	3.19842	2.94035	2.63165	2.211				9310	3.18788	3.19895
9330	3.17791	2.7958	2.65672	2.30729		9330	3.19225	2.93025	2.61878	2.22183				9320	3.17887	3.19842
9340	3.17905	2.79759	2.64999	2.31598		9340	3.18542	2.9128	2.61489	2.22974				9330	3.17791	3.19225
9350	3.17979	2.80178	2.66044	2.30091		9350	3.19445	2.92508	2.61761	2.23629				9340	3.17905	3.18542
9360	3.18586	2.79572	2.66518	2.31951		9360	3.1944	2.92487	2.61289	2.24193				9350	3.17979	3.19445
9370	3.18849	2.79424	2.67279	2.31978		9370	3.21081	2.94219	2.62285	2.25451				9360	3.18586	3.1944
9380	3.18999	2.78245	2.68163	2.32785		9380	3.20471	2.9388	2.62161	2.24298				9370	3.18849	3.21081
9390	3.17359	2.77067	2.67278	2.30716		9390	3.19738	2.93336	2.61161	2.24083				9380	3.18999	3.20471
9400	3.17546	2.7686	2.68611	2.29929		9400	3.20113	2.94032	2.60562	2.24939				9390	3.17359	3.19738
9410	3.17066	2.76367	2.68054	2.29848		9410	3.20163	2.94428	2.60969	2.2409				9400	3.17546	3.20113
9420	3.17339	2.76251	2.68535	2.30179		9420	3.20404	2.9497	2.60551	2.2455				9410	3.17066	3.20163
9430	3.17355	2.76155	2.68822	2.30004		9430	3.20267	2.94586	2.60112	2.25173				9420	3.17339	3.20404
9440	3.16844	2.76204	2.6849	2.28921		9440	3.19558	2.93901	2.59208	2.25095				9430	3.17355	3.20267
9450	3.1691	2.76316	2.68227	2.29277		9450	3.19616	2.93838	2.59095	2.25473				9440	3.16844	3.19558
9460	3.18385	2.78083	2.692	2.30086		9460	3.20344	2.94669	2.59871	2.25562				9450	3.1691	3.19616
9470	3.17528	2.77805	2.6739	2.30164		9470	3.19793	2.94183	2.59428	2.25142				9460	3.18385	3.20344
9480	3.18628	2.7882	2.66982	2.32439		9480	3.20546	2.94822	2.60391	2.25337				9470	3.17528	3.19793
9490	3.17268	2.78094	2.65381	2.31419		9490	3.20603	2.94636	2.60417	2.25711				9480	3.18628	3.20546
9500	3.17853	2.7787	2.65997	2.32584		9500	3.19801	2.93365	2.60263	2.2527				9490	3.17268	3.20603
9510	3.18006	2.7728	2.66112	2.33573		9510	3.19847	2.9364	2.60587	2.24665				9500	3.17853	3.19801
9520	3.17476	2.76913	2.66243	2.32414		9520	3.20074	2.93563	2.60931	2.25012				9510	3.18006	3.19847
9530	3.18156	2.78287	2.65631	2.33329		9530	3.1923	2.92655	2.60485	2.24313				9520	3.17476	3.20074
9540	3.17542	2.7685	2.65993	2.32954		9540	3.20167	2.93594	2.61761	2.2427				9530	3.18156	3.1923
9550	3.18271	2.77099	2.67158	2.33316		9550	3.18685	2.91932	2.61221	2.22844				9540	3.17542	3.20167
9560	3.18112	2.77568	2.66595	2.32968		9560	3.19653	2.9265	2.62126	2.23611				9550	3.18271	3.18685
9570	3.18428	2.7672	2.66978	2.34396		9570	3.18946	2.91989	2.61219	2.23517				9560	3.18112	3.19653
9580	3.18281	2.75326	2.67615	2.34912		9580	3.19496	2.92679	2.62086	2.23171				9570	3.18428	3.18946
9590	3.18009	2.74759	2.68451	2.33883		9590	3.19451	2.92382	2.61323	2.24323				9580	3.18281	3.19496
9600	3.19472	2.76248	2.70253	2.3404		9600	3.19187	2.92489	2.61435	2.23298				9590	3.18009	3.19451
9610	3.19765	2.76348	2.70914	2.33959		9610	3.19348	2.9187	2.61979	2.23932				9600	3.19472	3.19187
9620	3.196	2.76042	2.70639	2.34188		9620	3.19989	2.91643	2.63503	2.24267				9610	3.19765	3.19348
9630	3.19665	2.75728	2.71134	2.34162		9630	3.18986	2.90335	2.6108	2.25937				9620	3.196	3.19989
9640	3.19742	2.75379	2.70797	2.3517		9640	3.19109	2.90272	2.61919	2.25393				9630	3.19665	3.18986
9650	3.18647	2.73746	2.70669	2.3425		9650	3.19476	2.90896	2.61715	2.25863				9640	3.19742	3.19109
9660	3.18969	2.73833	2.71293	2.34301		9660	3.19958	2.91445	2.61917	2.26286				9650	3.18647	3.19476
9670	3.1963	2.74213	2.72625	2.34114		9670	3.18676	2.89306	2.61381	2.26032				9660	3.18969	3.19958
9680	3.20527	2.73975	2.74397	2.34775		9680	3.18497	2.88537	2.61569	2.26293				9670	3.1963	3.18676
9690	3.19356	2.72237	2.72901	2.35348		9690	3.17823	2.88066	2.61182	2.25443				9680	3.20527	3.18497
9700	3.20017	2.72942	2.73524	2.35605		9700	3.18966	2.89458	2.61758	2.26218				9690	3.19356	3.17823
9710	3.19815	2.72071	2.73659	2.35906		9710	3.17784	2.87844	2.60408	2.2651				9700	3.20017	3.18966
9720	3.19254	2.71648	2.73836	2.34665		9720	3.17491	2.87684	2.60211	2.26117				9710	3.19815	3.17784
9730	3.19307	2.71764	2.73743	2.34784		9730	3.20284	2.90194	2.62629	2.27983				9720	3.19254	3.17491
9740	3.18697	2.70515	2.73906	2.34377		9740	3.1999	2.89816	2.61864	2.28519				9730	3.19307	3.20284
9750	3.18905	2.70466	2.7434	2.34492		9750	3.18982	2.88992	2.60196	2.28649				9740	3.18697	3.1999
9760	3.20049	2.70439	2.75745	2.35988		9760	3.19894	2.90043	2.61252	2.28663				9750	3.18905	3.18982
9770	3.20429	2.70659	2.76238	2.36191		9770	3.20093	2.90363	2.61763	2.2823				9760	3.20049	3.19894
9780	3.18845	2.69734	2.74849	2.34577		9780	3.18855	2.88807	2.59997	2.28755				9770	3.20429	3.20093
9790	3.18979	2.70042	2.73904	2.35689		9790	3.18949	2.87864	2.60613	2.29504				9780	3.18845	3.18855
9800	3.18715	2.68628	2.73591	2.36951		9800	3.19194	2.88293	2.61454	2.28688				9790	3.18979	3.18949
9810	3.19118	2.67633	2.74386	2.38238		9810	3.19476	2.89339	2.61276	2.28357				9800	3.18715	3.19194
9820	3.18411	2.67264	2.73441	2.37849		9820	3.19942	2.89956	2.61161	2.29012				9810	3.19118	3.19476
9830	3.18048	2.66777	2.73839	2.36962		9830	3.20243	2.89953	2.61114	2.29909				9820	3.18411	3.19942
9840	3.17485	2.661	2.72654	2.37582		9840	3.19788	2.89109	2.60935	2.29909				9830	3.18048	3.20243
9850	3.18721	2.67184	2.7373	2.38434		9850	3.19734	2.89159	2.60748	2.29907				9840	3.17485	3.19788
9860	3.18802	2.67845	2.73453	2.38226		9860	3.19502	2.89134	2.61498	2.28438				9850	3.18721	3.19734
9870	3.18647	2.67601	2.73581	2.37937		9870	3.2069	2.90705	2.62721	2.28369				9860	3.18802	3.19502
9880	3.18124	2.67549	2.73091	2.3716		9880	3.20043	2.90513	2.62007	2.27616				9870	3.18647	3.2069
9890	3.18035	2.67852	2.72689	2.3704		9890	3.19461	2.9077	2.60166	2.27766				9880	3.18124	3.20043
9900	3.18827	2.68245	2.73452	2.37844		9900	3.18908	2.89645	2.6094	2.26762				9890	3.18035	3.19461
9910	3.19	2.69531	2.73521	2.36774		9910	3.1874	2.88846	2.61455	2.26713				9900	3.18827	3.18908
9920	3.18968	2.68433	2.73766	2.37648		9920	3.19278	2.89556	2.61696	2.27045				9910	3.19	3.1874
9930	3.185	2.692	2.72365	2.37133		9930	3.18954	2.89087	2.6084	2.27716				9920	3.18968	3.19278
9940	3.18014	2.68424	2.71641	2.3754		9940	3.18881	2.89281	2.61323	2.2671				9930	3.185	3.18954
9950	3.17912	2.6761	2.71237	2.38646		9950	3.20126	2.90822	2.62688	2.2667				9940	3.18014	3.18881
9960	3.18858	2.68165	2.71438	2.40313		9960	3.19549	2.90179	2.61872	2.26809				9950	3.17912	3.20126
9970	3.18544	2.67679	2.7137	2.401		9970	3.19039	2.90225	2.61493	2.25749				9960	3.18858	3.19549
9980	3.18659	2.67605	2.71757	2.40046		9980	3.19117	2.90468	2.61852	2.25241				9970	3.18544	3.19039
9990	3.18963	2.67291	2.7286	2.39954		9990	3.18841	2.90326	2.60458	2.26256				9980	3.18659	3.19117
10000	3.18957	2.6708	2.73193	2.39794		10000	3.18983	2.90555	2.60783	2.25988				9990	3.18963	3.18841
10010	3.1946	2.6858	2.73166	2.39488		10010	3.19037	2.90428	2.61382	2.2561				10000	3.18957	3.18983
10020	3.19247	2.69905	2.72101	2.38642		10020	3.19088	2.90571	2.61038	2.25968				10010	3.1946	3.19037
10030	3.18614	2.70291	2.71073	2.37679		10030	3.18003	2.8922	2.59729	2.26151				10020	3.19247	3.19088
10040	3.186	2.71017	2.71675	2.36125		10040	3.18956	2.89752	2.61447	2.26176				10030	3.18614	3.18003
10050	3.18605	2.70979	2.71556	2.36317		10050	3.19222	2.89536	2.61746	2.26856				10040	3.186	3.18956
10060	3.18162	2.70983	2.70388	2.3646		10060	3.19646	2.90178	2.62574	2.26271				10050	3.18605	3.19222
10070	3.17836	2.70461	2.70192	2.36403		10070	3.19114	2.898	2.60851	2.27244				10060	3.18162	3.19646
10080	3.17963	2.7125	2.7024	2.35785		10080	3.18893	2.90486	2.60531	2.26113				10070	3.17836	3.19114
10090	3.19013	2.73193	2.69916	2.36747		10090	3.18578	2.89893	2.61417	2.24961				10080	3.17963	3.18893
10100	3.19251	2.73182	2.7059	2.36633		10100	3.19627	2.91484	2.61899	2.25318				10090	3.19013	3.18578
10110	3.1817	2.72229	2.6894	2.367		10110	3.19865	2.91866	2.61761	2.25662				10100	3.19251	3.19627
10120	3.19295	2.72304	2.71082	2.37198		10120	3.18218	2.89925	2.60843	2.24565				10110	3.1817	3.19865
10130	3.1859	2.71174	2.71114	2.3656		10130	3.19197	2.91151	2.61153	2.25395				10120	3.19295	3.18218
10140	3.18847	2.72301	2.71779	2.35193		10140	3.18699	2.90388	2.60472	2.2576				10130	3.1859	3.19197
10150	3.19207	2.73517	2.7098	2.35679		10150	3.18312	2.8974	2.60061	2.25973				10140	3.18847	3.18699
10160	3.18389	2.72556	2.70883	2.34688		10160	3.18345	2.89289	2.60632	2.25987				10150	3.19207	3.18312
10170	3.18406	2.72557	2.70278	2.3543		10170	3.17987	2.88373	2.60166	2.26685				10160	3.18389	3.18345
10180	3.19035	2.72502	2.70514	2.36921		10180	3.18863	2.88609	2.61078	2.27795				10170	3.18406	3.17987
10190	3.19447	2.72031	2.7156	2.37376		10190	3.18526	2.88835	2.59901	2.2791				10180	3.19035	3.18863
10200	3.1865	2.70659	2.71054	2.3738		10200	3.18428	2.88619	2.6001	2.27786				10190	3.19447	3.18526
10210	3.19416	2.72404	2.7148	2.36956		10210	3.17917	2.88251	2.59548	2.27352				10200	3.1865	3.18428
10220	3.18588	2.71578	2.70379	2.36935		10220	3.18053	2.88412	2.59804	2.27234				10210	3.19416	3.17917
10230	3.18602	2.72259	2.70282	2.36297		10230	3.17954	2.88143	2.60369	2.26651				10220	3.18588	3.18053
10240	3.19081	2.71616	2.7163	2.36786		10240	3.1892	2.88723	2.60983	2.27919				10230	3.18602	3.17954
10250	3.18784	2.7146	2.72268	2.35427		10250	3.19405	2.89136	2.61123	2.28592				10240	3.19081	3.1892
10260	3.19157	2.71027	2.72225	2.36981		10260	3.19207	2.88731	2.61081	2.286				10250	3.18784	3.19405
10270	3.19762	2.7144	2.72682	2.37613		10270	3.18924	2.8831	2.60927	2.28516				10260	3.19157	3.19207
10280	3.19438	2.71041	2.72239	2.37704		10280	3.18634	2.87608	2.61316	2.28145				10270	3.19762	3.18924
10290	3.19762	2.70738	2.73418	2.37568		10290	3.19302	2.88824	2.60998	2.2884				10280	3.19438	3.18634
10300	3.18118	2.68861	2.71818	2.37123		10300	3.18548	2.87549	2.61274	2.2803				10290	3.19762	3.19302
10310	3.19871	2.69122	2.73472	2.39627		10310	3.19391	2.88472	2.62089	2.28286				10300	3.18118	3.18548
10320	3.1849	2.66318	2.72149	2.40585		10320	3.19294	2.89108	2.61573	2.278				10310	3.19871	3.19391
10330	3.19754	2.67002	2.72644	2.42613		10330	3.19246	2.88963	2.62614	2.2665				10320	3.1849	3.19294
10340	3.19427	2.66582	2.72804	2.42032		10340	3.1843	2.88396	2.60968	2.26977				10330	3.19754	3.19246
10350	3.18471	2.65006	2.72585	2.41489		10350	3.18679	2.89143	2.61343	2.26293				10340	3.19427	3.1843
10360	3.18704	2.6421	2.73685	2.41732		10360	3.18429	2.89256	2.60339	2.26602				10350	3.18471	3.18679
10370	3.18529	2.6577	2.73471	2.39796		10370	3.19868	2.91138	2.60197	2.28401				10360	3.18704	3.18429
10380	3.1791	2.66997	2.72477	2.37911		10380	3.19178	2.89947	2.58947	2.29403				10370	3.18529	3.19868
10390	3.17931	2.67855	2.72494	2.36984		10390	3.18757	2.88889	2.58082	2.30539				10380	3.1791	3.19178
10400	3.18704	2.69867	2.71891	2.37469		10400	3.18326	2.88132	2.57263	2.31212				10390	3.17931	3.18757
10410	3.17599	2.6994	2.70809	2.35655		10410	3.1852	2.88555	2.57309	2.31165				10400	3.18704	3.18326
10420	3.17661	2.70484	2.70646	2.35384		10420	3.18506	2.88834	2.5751	2.30554				10410	3.17599	3.1852
10430	3.17099	2.69517	2.70645	2.34981		10430	3.19265	2.89719	2.58283	2.30681				10420	3.17661	3.18506
10440	3.17346	2.68853	2.71789	2.35086		10440	3.18959	2.90246	2.57132	2.30458				10430	3.17099	3.19265
10450	3.18134	2.69628	2.72494	2.35512		10450	3.17693	2.89301	2.57276	2.27973				10440	3.17346	3.18959
10460	3.17602	2.69319	2.71624	2.35436		10460	3.17659	2.89884	2.56479	2.28037				10450	3.18134	3.17693
10470	3.17065	2.69272	2.7121	2.34517		10470	3.18873	2.91728	2.58088	2.27255				10460	3.17602	3.17659
10480	3.17641	2.69171	2.71615	2.3572		10480	3.1897	2.92168	2.58476	2.26521				10470	3.17065	3.18873
10490	3.18358	2.69411	2.72487	2.36372		10490	3.18852	2.92316	2.58073	2.26459				10480	3.17641	3.1897
10500	3.18195	2.69307	2.72349	2.36213		10500	3.19013	2.91961	2.58611	2.26754				10490	3.18358	3.18852
10510	3.17801	2.69026	2.72064	2.35798		10510	3.18498	2.9113	2.58515	2.26484				10500	3.18195	3.19013
10520	3.1742	2.69803	2.71824	2.34155		10520	3.19151	2.91533	2.59614	2.26548				10510	3.17801	3.18498
10530	3.17483	2.70195	2.71971	2.33704		10530	3.18709	2.91123	2.59311	2.26177				10520	3.1742	3.19151
10540	3.19033	2.71587	2.73477	2.34552		10540	3.19397	2.9176	2.59619	2.26944				10530	3.17483	3.18709
10550	3.18623	2.71905	2.7289	2.33752		10550	3.1996	2.92244	2.59581	2.27948				10540	3.19033	3.19397
10560	3.18973	2.74139	2.71827	2.33334		10560	3.19236	2.91905	2.58682	2.27373				10550	3.18623	3.1996
10570	3.19205	2.74755	2.71885	2.33178		10570	3.20253	2.92343	2.59608	2.28611				10560	3.18973	3.19236
10580	3.18575	2.73936	2.71107	2.33322		10580	3.20221	2.9259	2.61111	2.26484				10570	3.19205	3.20253
10590	3.20563	2.76649	2.72633	2.33789		10590	3.18625	2.90557	2.59589	2.2635				10580	3.18575	3.20221
10600	3.19901	2.76899	2.7214	2.32248		10600	3.20012	2.91647	2.61409	2.26767				10590	3.20563	3.18625
10610	3.18415	2.75514	2.70529	2.31695		10610	3.19347	2.90523	2.6078	2.27056				10600	3.19901	3.20012
10620	3.19508	2.76899	2.71242	2.32218		10620	3.19238	2.90536	2.60961	2.26526				10610	3.18415	3.19347
10630	3.18854	2.77851	2.70212	2.30477		10630	3.18943	2.9023	2.59943	2.27256				10620	3.19508	3.19238
10640	3.1949	2.78833	2.7113	2.29974		10640	3.19358	2.90812	2.60698	2.26812				10630	3.18854	3.18943
10650	3.19435	2.79127	2.71549	2.28969		10650	3.19767	2.91162	2.62017	2.25994				10640	3.1949	3.19358
10660	3.19161	2.76788	2.73041	2.29268		10660	3.18638	2.90339	2.61047	2.24985				10650	3.19435	3.19767
10670	3.19102	2.77385	2.72404	2.2914		10670	3.18766	2.90159	2.61852	2.24643				10660	3.19161	3.18638
10680	3.19401	2.78008	2.73661	2.27719		10680	3.18037	2.9008	2.60632	2.24096				10670	3.19102	3.18766
10690	3.19621	2.77304	2.73783	2.29042		10690	3.18472	2.91029	2.6002	2.24813				10680	3.19401	3.18037
10700	3.19046	2.77106	2.733	2.28255		10700	3.18761	2.91144	2.60994	2.24353				10690	3.19621	3.18472
10710	3.18808	2.76827	2.73215	2.2803		10710	3.17574	2.90281	2.59678	2.23632				10700	3.19046	3.18761
10720	3.18674	2.7539	2.73523	2.29022		10720	3.18136	2.90669	2.60222	2.24091				10710	3.18808	3.17574
10730	3.18904	2.76394	2.73187	2.28857		10730	3.18091	2.89753	2.60957	2.24295				10720	3.18674	3.18136
10740	3.18246	2.76291	2.72058	2.28491		10740	3.18227	2.9001	2.60272	2.25142				10730	3.18904	3.18091
10750	3.18882	2.78229	2.72647	2.27208		10750	3.18951	2.90565	2.61129	2.25482				10740	3.18246	3.18227
10760	3.1904	2.78801	2.7298	2.26549		10760	3.18719	2.9016	2.60454	2.2613				10750	3.18882	3.18951
10770	3.19906	2.79285	2.73384	2.27905		10770	3.19258	2.91359	2.60425	2.26143				10760	3.1904	3.18719
10780	3.19751	2.78724	2.73734	2.27735		10780	3.18351	2.90461	2.59013	2.2636				10770	3.19906	3.19258
10790	3.20739	2.79135	2.75136	2.2832		10790	3.18817	2.91093	2.59444	2.26368				10780	3.19751	3.18351
10800	3.20644	2.79229	2.74657	2.28517		10800	3.19911	2.92287	2.60994	2.26133				10790	3.20739	3.18817
10810	3.19937	2.78132	2.7463	2.27904		10810	3.19499	2.92266	2.61364	2.24562				10800	3.20644	3.19911
10820	3.19947	2.78268	2.7523	2.27041		10820	3.18183	2.91324	2.59464	2.24252				10810	3.19937	3.19499
10830	3.19562	2.76938	2.74871	2.28017		10830	3.18776	2.91927	2.60309	2.24175				10820	3.19947	3.18183
10840	3.1975	2.77172	2.74973	2.28136		10840	3.18492	2.92285	2.60454	2.22726				10830	3.19562	3.18776
10850	3.19391	2.77074	2.75297	2.26854		10850	3.18624	2.91797	2.60964	2.23148				10840	3.1975	3.18492
10860	3.19711	2.76992	2.75173	2.28004		10860	3.18918	2.91531	2.60354	2.25038				10850	3.19391	3.18624
10870	3.19241	2.76954	2.74624	2.27394		10870	3.19592	2.9227	2.60156	2.2622				10860	3.19711	3.18918
10880	3.18493	2.75492	2.74822	2.26833		10880	3.18946	2.91927	2.59791	2.25257				10870	3.19241	3.19592
10890	3.18583	2.75451	2.74595	2.27408		10890	3.18251	2.91532	2.58958	2.24759				10880	3.18493	3.18946
10900	3.19411	2.76971	2.74262	2.28285		10900	3.18581	2.91306	2.5908	2.25844				10890	3.18583	3.18251
10910	3.19875	2.77492	2.73877	2.29412		10910	3.18456	2.91462	2.59623	2.24667				10900	3.19411	3.18581
10920	3.19739	2.77404	2.73324	2.29799		10920	3.19399	2.92574	2.5964	2.25874				10910	3.19875	3.18456
10930	3.20285	2.77622	2.73146	2.31261		10930	3.17972	2.91258	2.5801	2.25415				10920	3.19739	3.19399
10940	3.1974	2.76613	2.73306	2.30774		10940	3.18047	2.9142	2.58697	2.24629				10930	3.20285	3.17972
10950	3.19465	2.76151	2.72687	2.31297		10950	3.18335	2.92337	2.58511	2.24468				10940	3.1974	3.18047
10960	3.18739	2.75612	2.71701	2.31098		10960	3.18169	2.92625	2.57938	2.24279				10950	3.19465	3.18335
10970	3.19476	2.76244	2.72781	2.31106		10970	3.18273	2.92171	2.5917	2.23748				10960	3.18739	3.18169
10980	3.202	2.77106	2.74025	2.30605		10980	3.18081	2.91592	2.58573	2.24643				10970	3.19476	3.18273
10990	3.21488	2.78037	2.75492	2.3132		10990	3.18212	2.92469	2.59234	2.2311				10980	3.202	3.18081
11000	3.19475	2.75963	2.73646	2.30415		11000	3.17745	2.91669	2.58833	2.2329				10990	3.21488	3.18212
11010	3.19816	2.76612	2.74276	2.29831		11010	3.18076	2.92284	2.59662	2.22464				11000	3.19475	3.17745
11020	3.20372	2.77035	2.74743	2.30314		11020	3.16855	2.91295	2.5861	2.21498				11010	3.19816	3.18076
11030	3.20486	2.76813	2.74688	2.30962		11030	3.18217	2.92869	2.60141	2.21536				11020	3.20372	3.16855
11040	3.19585	2.76177	2.73983	2.30061		11040	3.1784	2.92352	2.60214	2.21051				11030	3.20486	3.18217
11050	3.18981	2.76142	2.72887	2.2973		11050	3.1792	2.92048	2.59231	2.22832				11040	3.19585	3.1784
11060	3.18998	2.76632	2.73124	2.28905		11060	3.17613	2.91653	2.5955	2.221				11050	3.18981	3.1792
11070	3.18915	2.77224	2.72486	2.2872		11070	3.18386	2.92306	2.60815	2.21972				11060	3.18998	3.17613
11080	3.19615	2.77705	2.7344	2.28949		11080	3.18985	2.93379	2.61784	2.21135				11070	3.18915	3.18386
11090	3.18894	2.76958	2.73156	2.28182		11090	3.18417	2.92995	2.61904	2.19861				11080	3.19615	3.18985
11100	3.19251	2.77943	2.73442	2.27641		11100	3.18193	2.9295	2.61977	2.19185				11090	3.18894	3.18417
11110	3.19	2.77564	2.72695	2.28292		11110	3.18695	2.93779	2.62083	2.19406				11100	3.19251	3.18193
11120	3.19707	2.77743	2.73698	2.28852		11120	3.17807	2.92819	2.60854	2.19579				11110	3.19	3.18695
11130	3.19547	2.77753	2.73475	2.28661		11130	3.17381	2.92813	2.60045	2.19315				11120	3.19707	3.17807
11140	3.20018	2.78012	2.74158	2.28844		11140	3.17272	2.93091	2.60231	2.18405				11130	3.19547	3.17381
11150	3.20536	2.78934	2.74376	2.2891		11150	3.17682	2.93006	2.61173	2.18585				11140	3.20018	3.17272
11160	3.20668	2.77895	2.74367	2.30549		11160	3.171	2.92634	2.60426	2.18284				11150	3.20536	3.17682
11170	3.1964	2.77348	2.73147	2.29801		11170	3.17778	2.93935	2.60228	2.18744				11160	3.20668	3.171
11180	3.19774	2.78602	2.7341	2.28339		11180	3.17768	2.93948	2.60246	2.18678				11170	3.1964	3.17778
11190	3.19183	2.7834	2.72693	2.27863		11190	3.18137	2.94225	2.60969	2.18516				11180	3.19774	3.17768
11200	3.19196	2.77749	2.73547	2.27595		11200	3.17397	2.9297	2.59713	2.19545				11190	3.19183	3.18137
11210	3.19408	2.76602	2.74179	2.28823		11210	3.17961	2.94199	2.59327	2.19989				11200	3.19196	3.17397
11220	3.195	2.76769	2.74627	2.28341		11220	3.18169	2.9441	2.58999	2.20693				11210	3.19408	3.17961
11230	3.2018	2.77222	2.74963	2.29288		11230	3.17098	2.93525	2.59101	2.18658				11220	3.195	3.18169
11240	3.1911	2.77195	2.73835	2.27684		11240	3.17605	2.94287	2.58607	2.19689				11230	3.2018	3.17098
11250	3.19717	2.78415	2.73958	2.27749		11250	3.18862	2.95712	2.6021	2.19524				11240	3.1911	3.17605
11260	3.19282	2.77783	2.73266	2.28131		11260	3.18786	2.95874	2.61233	2.17865				11250	3.19717	3.18862
11270	3.19615	2.78515	2.73242	2.282		11270	3.18519	2.95536	2.61072	2.17734				11260	3.19282	3.18786
11280	3.18387	2.76368	2.72912	2.27773		11280	3.17783	2.94981	2.61314	2.16041				11270	3.19615	3.18519
11290	3.18434	2.76646	2.73395	2.26986		11290	3.1779	2.95392	2.60355	2.16655				11280	3.18387	3.17783
11300	3.18421	2.76088	2.74219	2.26633		11300	3.17155	2.94788	2.59275	2.16913				11290	3.18434	3.1779
11310	3.18149	2.76356	2.73921	2.25903		11310	3.1717	2.94718	2.59448	2.16845				11300	3.18421	3.17155
11320	3.17819	2.76515	2.73491	2.25299		11320	3.17426	2.95118	2.59829	2.16592				11310	3.18149	3.1717
11330	3.1843	2.77529	2.73987	2.25174		11330	3.17233	2.95001	2.58751	2.17474				11320	3.17819	3.17426
11340	3.18182	2.7662	2.73549	2.26125		11340	3.16933	2.94199	2.58554	2.1792				11330	3.1843	3.17233
11350	3.18631	2.76134	2.74808	2.26455		11350	3.17771	2.94542	2.60184	2.17959				11340	3.18182	3.16933
11360	3.18197	2.74635	2.75713	2.25957		11360	3.18016	2.95089	2.6033	2.17759				11350	3.18631	3.17771
11370	3.18015	2.73485	2.75601	2.26975		11370	3.17351	2.94302	2.59955	2.17332				11360	3.18197	3.18016
11380	3.18309	2.73301	2.75355	2.28315		11380	3.18018	2.94982	2.60684	2.17485				11370	3.18015	3.17351
11390	3.18926	2.73973	2.75799	2.28694		11390	3.18477	2.9542	2.61288	2.17512				11380	3.18309	3.18018
11400	3.18186	2.72556	2.74954	2.29343		11400	3.1754	2.94508	2.5938	2.18291				11390	3.18926	3.18477
11410	3.1941	2.73082	2.75905	2.30974		11410	3.18018	2.95143	2.59448	2.18744				11400	3.18186	3.1754
11420	3.18853	2.71812	2.75815	2.31038		11420	3.17585	2.94625	2.59449	2.18182				11410	3.1941	3.18018
11430	3.18814	2.7231	2.75588	2.30615		11430	3.17309	2.94292	2.59409	2.17874				11420	3.18853	3.17585
11440	3.1962	2.73662	2.76652	2.29969		11440	3.17632	2.9462	2.60287	2.17326				11430	3.18814	3.17309
11450	3.19254	2.73842	2.75627	2.2997		11450	3.17173	2.9418	2.60278	2.16587				11440	3.1962	3.17632
11460	3.2009	2.74134	2.77361	2.29862		11460	3.17671	2.94686	2.61258	2.16179				11450	3.19254	3.17173
11470	3.19736	2.73793	2.76845	2.29906		11470	3.17933	2.95419	2.60676	2.16652				11460	3.2009	3.17671
11480	3.19901	2.74265	2.77392	2.29141		11480	3.17882	2.94954	2.60475	2.17378				11470	3.19736	3.17933
11490	3.19454	2.7486	2.76483	2.28279		11490	3.18079	2.95219	2.60169	2.17961				11480	3.19901	3.17882
11500	3.2108	2.76872	2.78172	2.28358		11500	3.17895	2.94984	2.59174	2.18925				11490	3.19454	3.18079
11510	3.21023	2.76407	2.77228	2.29905		11510	3.17817	2.94966	2.59376	2.18482				11500	3.2108	3.17895
11520	3.19309	2.75438	2.7566	2.2817		11520	3.18411	2.9589	2.58815	2.19625				11510	3.21023	3.17817
11530	3.18928	2.74546	2.75608	2.28243		11530	3.1704	2.94406	2.57493	2.19205				11520	3.19309	3.18411
11540	3.19411	2.75717	2.75157	2.28725		11540	3.17382	2.94545	2.58373	2.18973				11530	3.18928	3.1704
11550	3.18997	2.74968	2.75144	2.28487		11550	3.16465	2.93328	2.58159	2.18204				11540	3.19411	3.17382
11560	3.19024	2.75007	2.74457	2.2934		11560	3.17203	2.94426	2.58523	2.18436				11550	3.18997	3.16465
11570	3.19874	2.76676	2.74504	2.29646		11570	3.1663	2.93899	2.58585	2.17408				11560	3.19024	3.17203
11580	3.1893	2.75214	2.73871	2.29533		11580	3.16933	2.94206	2.58718	2.17717				11570	3.19874	3.1663
11590	3.18676	2.75361	2.7431	2.28122		11590	3.16591	2.93823	2.58896	2.17029				11580	3.1893	3.16933
11600	3.17742	2.74583	2.73213	2.27771		11600	3.16996	2.94127	2.58765	2.17952				11590	3.18676	3.16591
11610	3.17935	2.7484	2.72986	2.28269		11610	3.16243	2.93024	2.57893	2.18284				11600	3.17742	3.16996
11620	3.1969	2.75754	2.74595	2.30132		11620	3.16101	2.93211	2.57546	2.18029				11610	3.17935	3.16243
11630	3.20049	2.76047	2.75319	2.29913		11630	3.17255	2.94678	2.59233	2.17403				11620	3.1969	3.16101
11640	3.19813	2.76567	2.74674	2.29404		11640	3.1718	2.94382	2.58912	2.17969				11630	3.20049	3.17255
11650	3.17956	2.75344	2.73695	2.26869		11650	3.1707	2.94297	2.5888	2.17802				11640	3.19813	3.1718
11660	3.18495	2.76358	2.74275	2.26444		11660	3.17973	2.95415	2.60641	2.16819				11650	3.17956	3.1707
11670	3.19825	2.77784	2.74959	2.27618		11670	3.17674	2.9529	2.60386	2.16418				11660	3.18495	3.17973
11680	3.19529	2.77165	2.75349	2.27067		11680	3.17789	2.9542	2.60994	2.15843				11670	3.19825	3.17674
11690	3.18923	2.75714	2.75042	2.27503		11690	3.17901	2.95712	2.603	2.16611				11680	3.19529	3.17789
11700	3.18502	2.75285	2.74746	2.27201		11700	3.16045	2.9336	2.58394	2.16659				11690	3.18923	3.17901
11710	3.19371	2.75585	2.75061	2.2889		11710	3.16928	2.94439	2.58984	2.17071				11700	3.18502	3.16045
11720	3.19493	2.7593	2.75401	2.28404		11720	3.17474	2.95088	2.60142	2.16401				11710	3.19371	3.16928
11730	3.18123	2.75525	2.73323	2.27563		11730	3.16849	2.94478	2.59787	2.15823				11720	3.19493	3.17474
11740	3.18126	2.76268	2.73895	2.25976		11740	3.15503	2.9275	2.59037	2.15132				11730	3.18123	3.16849
11750	3.17567	2.75921	2.73179	2.25695		11750	3.16388	2.93701	2.60245	2.14977				11740	3.18126	3.15503
11760	3.1758	2.76415	2.72473	2.25981		11760	3.16619	2.93778	2.59736	2.16165				11750	3.17567	3.16388
11770	3.18142	2.7728	2.73125	2.25716		11770	3.17211	2.94352	2.61063	2.1552				11760	3.1758	3.16619
11780	3.18988	2.77491	2.7326	2.27672		11780	3.17869	2.95041	2.61161	2.16396				11770	3.18142	3.17211
11790	3.19877	2.78191	2.74197	2.28184		11790	3.18866	2.96261	2.62029	2.16614				11780	3.18988	3.17869
11800	3.18801	2.77314	2.72662	2.28079		11800	3.1843	2.96024	2.6173	2.16014				11790	3.19877	3.18866
11810	3.1958	2.77809	2.73811	2.28282		11810	3.17926	2.95304	2.60468	2.17041				11800	3.18801	3.1843
11820	3.19749	2.78024	2.73182	2.29243		11820	3.17708	2.95059	2.59527	2.17861				11810	3.1958	3.17926
11830	3.19536	2.77531	2.73006	2.29458		11830	3.17669	2.95326	2.60286	2.16473				11820	3.19749	3.17708
11840	3.18949	2.76893	2.72774	2.28871		11840	3.1753	2.9493	2.60432	2.1643				11830	3.19536	3.17669
11850	3.18654	2.77285	2.72109	2.28364		11850	3.17431	2.95361	2.61119	2.14716				11840	3.18949	3.1753
11860	3.17475	2.75977	2.70865	2.28144		11860	3.17604	2.95534	2.61608	2.14394				11850	3.18654	3.17431
11870	3.19205	2.77243	2.73391	2.28423		11870	3.16836	2.94763	2.60966	2.13966				11860	3.17475	3.17604
11880	3.18286	2.76585	2.72367	2.2788		11880	3.17716	2.95553	2.62425	2.13701				11870	3.19205	3.16836
11890	3.17689	2.75955	2.71396	2.28135		11890	3.1756	2.95512	2.623	2.13449				11880	3.18286	3.17716
11900	3.18074	2.76033	2.72413	2.27902		11900	3.17835	2.9579	2.62029	2.14215				11890	3.17689	3.1756
11910	3.1744	2.75393	2.72261	2.27088		11910	3.16443	2.93823	2.61179	2.13836				11900	3.18074	3.17835
11920	3.17797	2.75884	2.72661	2.27011		11920	3.17512	2.95357	2.62257	2.13574				11910	3.1744	3.16443
11930	3.18288	2.75669	2.72785	2.28495		11930	3.1851	2.96616	2.63336	2.13471				11920	3.17797	3.17512
11940	3.16922	2.73698	2.71709	2.28348		11940	3.17538	2.95406	2.61898	2.14023				11930	3.18288	3.1851
11950	3.17523	2.74729	2.72708	2.27586		11950	3.17877	2.95684	2.62338	2.14105				11940	3.16922	3.17538
11960	3.19035	2.76175	2.74697	2.27673		11960	3.18054	2.9605	2.62328	2.14136				11950	3.17523	3.17877
11970	3.19298	2.76236	2.74802	2.28208		11970	3.18454	2.96757	2.62724	2.13862				11960	3.19035	3.18054
11980	3.18858	2.75506	2.74415	2.28328		11980	3.17853	2.95716	2.62023	2.14376				11970	3.19298	3.18454
11990	3.18025	2.7434	2.74456	2.27357		11990	3.17646	2.95523	2.60847	2.1546				11980	3.18858	3.17853
12000	3.17953	2.73894	2.73855	2.28415		12000	3.17151	2.94761	2.60657	2.15275				11990	3.18025	3.17646
12010	3.17398	2.74444	2.71936	2.28504		12010	3.1763	2.95711	2.60532	2.15537				12000	3.17953	3.17151
12020	3.17589	2.73681	2.72763	2.28964		12020	3.16985	2.94948	2.58876	2.16673				12010	3.17398	3.1763
12030	3.17916	2.7336	2.74225	2.28508		12030	3.17084	2.95129	2.58638	2.17002				12020	3.17589	3.16985
12040	3.16997	2.72558	2.7286	2.28548		12040	3.17121	2.95258	2.59348	2.16085				12030	3.17916	3.17084
12050	3.17921	2.72852	2.73616	2.29855		12050	3.17197	2.95027	2.59636	2.16276				12040	3.16997	3.17121
12060	3.17895	2.72958	2.73357	2.29966		12060	3.1739	2.9529	2.59894	2.16175				12050	3.17921	3.17197
12070	3.17357	2.72573	2.72539	2.29907		12070	3.17971	2.96006	2.59701	2.17132				12060	3.17895	3.1739
12080	3.17886	2.72756	2.73709	2.29762		12080	3.18954	2.97328	2.60404	2.1737				12070	3.17357	3.17971
12090	3.18499	2.73792	2.74103	2.29759		12090	3.18328	2.96664	2.61481	2.15136				12080	3.17886	3.18954
12100	3.17716	2.72597	2.73634	2.29571		12100	3.18293	2.96572	2.61476	2.15166				12090	3.18499	3.18328
12110	3.18686	2.72601	2.74714	2.30959		12110	3.18197	2.95977	2.62457	2.14505				12100	3.17716	3.18293
12120	3.1797	2.72205	2.73548	2.30838		12120	3.17945	2.96128	2.6196	2.14157				12110	3.18686	3.18197
12130	3.1794	2.7177	2.72433	2.3258		12130	3.18225	2.96323	2.62696	2.13816				12120	3.1797	3.17945
12140	3.18761	2.71674	2.73588	2.33582		12140	3.17075	2.94722	2.61735	2.13792				12130	3.1794	3.18225
12150	3.1836	2.72248	2.72841	2.32691		12150	3.17034	2.95031	2.61571	2.13444				12140	3.18761	3.17075
12160	3.18238	2.72084	2.72594	2.32837		12160	3.17317	2.95504	2.61211	2.14071				12150	3.1836	3.17034
12170	3.17232	2.70783	2.72211	2.32057		12170	3.17218	2.95355	2.62276	2.12676				12160	3.18238	3.17317
12180	3.17825	2.71353	2.73443	2.31563		12180	3.16225	2.93956	2.61005	2.1322				12170	3.17232	3.17218
12190	3.18471	2.72442	2.74021	2.31377		12190	3.17206	2.95059	2.61186	2.14385				12180	3.17825	3.16225
12200	3.18993	2.73557	2.74596	2.30816		12200	3.17601	2.95972	2.6118	2.14305				12190	3.18471	3.17206
12210	3.19407	2.73854	2.7535	2.30711		12210	3.17673	2.95976	2.6149	2.14134				12200	3.18993	3.17601
12220	3.18336	2.73876	2.73845	2.29514		12220	3.17411	2.95473	2.62151	2.1324				12210	3.19407	3.17673
12230	3.18738	2.74167	2.73416	2.3079		12230	3.16828	2.95159	2.62191	2.11889				12220	3.18336	3.17411
12240	3.17987	2.7453	2.71748	2.30256		12240	3.1708	2.95319	2.62231	2.12371				12230	3.18738	3.16828
12250	3.17351	2.7356	2.7099	2.30549		12250	3.16611	2.94492	2.61747	2.12715				12240	3.17987	3.1708
12260	3.16473	2.73194	2.70448	2.29202		12260	3.16046	2.93942	2.61548	2.1204				12250	3.17351	3.16611
12270	3.17045	2.73583	2.71495	2.29082		12270	3.16757	2.94572	2.60928	2.14042				12260	3.16473	3.16046
12280	3.16685	2.72607	2.71121	2.29689		12280	3.17178	2.9498	2.61442	2.141				12270	3.17045	3.16757
12290	3.16417	2.72962	2.71945	2.27547		12290	3.16749	2.9468	2.61879	2.12704				12280	3.16685	3.17178
12300	3.15737	2.72006	2.71495	2.27338		12300	3.17386	2.95363	2.61763	2.13797				12290	3.16417	3.16749
12310	3.16764	2.72279	2.73145	2.27893		12310	3.16565	2.94379	2.61086	2.13546				12300	3.15737	3.17386
12320	3.17698	2.73113	2.74905	2.27379		12320	3.16418	2.94151	2.60744	2.13842				12310	3.16764	3.16565
12330	3.16916	2.72045	2.74142	2.27396		12330	3.16104	2.93544	2.61183	2.1321				12320	3.17698	3.16418
12340	3.16375	2.71901	2.74189	2.26001		12340	3.15906	2.93179	2.60256	2.14255				12330	3.16916	3.16104
12350	3.15434	2.71416	2.72509	2.25985		12350	3.15163	2.92328	2.6038	2.13076				12340	3.16375	3.15906
12360	3.16002	2.71806	2.72347	2.27295		12360	3.15865	2.93356	2.60776	2.13261				12350	3.15434	3.15163
12370	3.15783	2.71454	2.72404	2.27038		12370	3.16966	2.94773	2.61414	2.13791				12360	3.16002	3.15865
12380	3.16427	2.72848	2.72578	2.26951		12380	3.16573	2.94138	2.60993	2.14016				12370	3.15783	3.16966
12390	3.16907	2.73891	2.73219	2.26262		12390	3.16276	2.93784	2.61318	2.13227				12380	3.16427	3.16573
12400	3.17921	2.75664	2.73177	2.27005		12400	3.16698	2.9426	2.60582	2.14718				12390	3.16907	3.16276
12410	3.171	2.75428	2.72515	2.25789		12410	3.16858	2.94851	2.60958	2.13921				12400	3.17921	3.16698
12420	3.17639	2.7542	2.73053	2.26659		12420	3.16559	2.94176	2.60882	2.14055				12410	3.171	3.16858
12430	3.18715	2.76618	2.74086	2.26977		12430	3.16976	2.94879	2.61229	2.139				12420	3.17639	3.16559
12440	3.18299	2.76689	2.72675	2.2742		12440	3.16973	2.94414	2.60868	2.1497				12430	3.18715	3.16976
12450	3.18215	2.77189	2.72854	2.26359		12450	3.16716	2.94425	2.60126	2.15096				12440	3.18299	3.16973
12460	3.17203	2.76454	2.71171	2.2644		12460	3.16735	2.94703	2.6096	2.13758				12450	3.18215	3.16716
12470	3.17352	2.76694	2.70881	2.26911		12470	3.17008	2.94807	2.61	2.14375				12460	3.17203	3.16735
12480	3.17077	2.76066	2.70744	2.27071		12480	3.17597	2.95123	2.62404	2.13969				12470	3.17352	3.17008
12490	3.17487	2.75753	2.71434	2.27773		12490	3.16324	2.94018	2.61268	2.13105				12480	3.17077	3.17597
12500	3.18192	2.76782	2.71377	2.28556		12500	3.16138	2.93877	2.61328	2.12674				12490	3.17487	3.16324
12510	3.17444	2.74709	2.72468	2.27677		12510	3.16685	2.94555	2.62599	2.11797				12500	3.18192	3.16138
12520	3.16673	2.74489	2.71295	2.27197		12520	3.16869	2.94419	2.62675	2.12441				12510	3.17444	3.16685
12530	3.17375	2.74219	2.72096	2.2852		12530	3.16573	2.94279	2.62415	2.12071				12520	3.16673	3.16869
12540	3.17525	2.7565	2.71414	2.28024		12540	3.16966	2.94831	2.62156	2.128				12530	3.17375	3.16573
12550	3.16972	2.75706	2.70042	2.28047		12550	3.17732	2.9558	2.63392	2.12519				12540	3.17525	3.16966
12560	3.16239	2.75823	2.69479	2.26531		12560	3.17614	2.95138	2.63368	2.12811				12550	3.16972	3.17732
12570	3.16742	2.76405	2.69802	2.26842		12570	3.16303	2.93642	2.62987	2.1144				12560	3.16239	3.17614
12580	3.15159	2.75477	2.67528	2.26255		12580	3.17164	2.94716	2.62881	2.12655				12570	3.16742	3.16303
12590	3.14636	2.75346	2.66947	2.25646		12590	3.16539	2.93806	2.6315	2.11716				12580	3.15159	3.17164
12600	3.1524	2.76039	2.66993	2.26428		12600	3.18099	2.95558	2.64617	2.12126				12590	3.14636	3.16539
12610	3.1554	2.76085	2.681	2.25899		12610	3.1804	2.95594	2.64555	2.11977				12600	3.1524	3.18099
12620	3.1549	2.76661	2.67852	2.25348		12620	3.17176	2.94762	2.63843	2.11431				12610	3.1554	3.1804
12630	3.1622	2.77488	2.69417	2.24509		12630	3.17964	2.95787	2.6458	2.11445				12620	3.1549	3.17176
12640	3.15161	2.7646	2.67628	2.24941		12640	3.16956	2.94547	2.63409	2.11611				12630	3.1622	3.17964
12650	3.15598	2.76771	2.67985	2.25358		12650	3.18361	2.96015	2.64007	2.13034				12640	3.15161	3.16956
12660	3.1554	2.76789	2.68122	2.2501		12660	3.17723	2.95284	2.64114	2.12005				12650	3.15598	3.18361
12670	3.16065	2.76304	2.68949	2.26089		12670	3.1649	2.93918	2.63077	2.11506				12660	3.1554	3.17723
12680	3.15755	2.76208	2.68317	2.26092		12680	3.17178	2.9451	2.65087	2.10228				12670	3.16065	3.1649
12690	3.15651	2.76017	2.68781	2.25484		12690	3.16692	2.93718	2.64504	2.10606				12680	3.15755	3.17178
12700	3.17393	2.7777	2.70316	2.26383		12700	3.1696	2.94071	2.65024	2.10265				12690	3.15651	3.16692
12710	3.1684	2.77656	2.69204	2.263		12710	3.16322	2.93178	2.64654	2.10057				12700	3.17393	3.1696
12720	3.16842	2.77092	2.6996	2.26097		12720	3.16672	2.93799	2.6508	2.09705				12710	3.1684	3.16322
12730	3.16449	2.76344	2.70722	2.24998		12730	3.15722	2.92646	2.63167	2.1086				12720	3.16842	3.16672
12740	3.1748	2.7703	2.71258	2.2641		12740	3.15558	2.92664	2.63037	2.10506				12730	3.16449	3.15722
12750	3.17169	2.77703	2.70589	2.25511		12750	3.16197	2.93819	2.63472	2.10269				12740	3.1748	3.15558
12760	3.16176	2.77133	2.70342	2.23713		12760	3.1519	2.92641	2.63199	2.09229				12750	3.17169	3.16197
12770	3.16796	2.78044	2.71087	2.23434		12770	3.14885	2.92202	2.63609	2.08408				12760	3.16176	3.1519
12780	3.17108	2.77357	2.71552	2.24606		12780	3.14847	2.92348	2.62743	2.09178				12770	3.16796	3.14885
12790	3.18229	2.77909	2.72297	2.26186		12790	3.15692	2.93262	2.64018	2.08842				12780	3.17108	3.14847
12800	3.17153	2.76452	2.7163	2.25752		12800	3.16408	2.94378	2.64823	2.08418				12790	3.18229	3.15692
12810	3.18114	2.77538	2.7248	2.26098		12810	3.16784	2.94812	2.65606	2.07951				12800	3.17153	3.16408
12820	3.17605	2.76398	2.72007	2.26631		12820	3.16099	2.93697	2.65122	2.0806				12810	3.18114	3.16784
12830	3.17344	2.75642	2.71115	2.27888		12830	3.16224	2.93951	2.64435	2.08954				12820	3.17605	3.16099
12840	3.17643	2.75755	2.71464	2.28169		12840	3.16236	2.93788	2.64842	2.08704				12830	3.17344	3.16224
12850	3.18657	2.7696	2.72436	2.28379		12850	3.15831	2.93293	2.65084	2.07866				12840	3.17643	3.16236
12860	3.18484	2.76543	2.7257	2.28241		12860	3.15426	2.92853	2.64608	2.07861				12850	3.18657	3.15831
12870	3.17414	2.75654	2.7152	2.27585		12870	3.16301	2.93872	2.65302	2.08197				12860	3.18484	3.15426
12880	3.17819	2.76715	2.71652	2.27269		12880	3.15537	2.92897	2.64719	2.07997				12870	3.17414	3.16301
12890	3.18118	2.77268	2.70979	2.28234		12890	3.16661	2.94268	2.65526	2.08448				12880	3.17819	3.15537
12900	3.17035	2.7644	2.69909	2.27491		12900	3.15348	2.92551	2.63757	2.09129				12890	3.18118	3.16661
12910	3.17118	2.76887	2.68832	2.28451		12910	3.16383	2.93663	2.64883	2.09274				12900	3.17035	3.15348
12920	3.17543	2.78066	2.69865	2.26979		12920	3.16667	2.94056	2.64841	2.09632				12910	3.17118	3.16383
12930	3.16845	2.77819	2.68825	2.26565		12930	3.16458	2.9382	2.64767	2.09427				12920	3.17543	3.16667
12940	3.1715	2.78302	2.6899	2.26628		12940	3.15337	2.92694	2.63781	2.08866				12930	3.16845	3.16458
12950	3.17307	2.77557	2.69296	2.27618		12950	3.16193	2.93583	2.65499	2.08029				12940	3.1715	3.15337
12960	3.16897	2.76922	2.69204	2.27356		12960	3.15401	2.92721	2.64321	2.08337				12950	3.17307	3.16193
12970	3.17093	2.76747	2.68619	2.28804		12970	3.15944	2.93029	2.65371	2.08216				12960	3.16897	3.15401
12980	3.17101	2.76722	2.68555	2.28932		12980	3.15849	2.92836	2.65449	2.08098				12970	3.17093	3.15944
12990	3.17627	2.77616	2.68077	2.29865		12990	3.16067	2.93472	2.65418	2.07903				12980	3.17101	3.15849
13000	3.16938	2.762	2.68648	2.29001		13000	3.16653	2.9425	2.65793	2.0811				12990	3.17627	3.16067
13010	3.18435	2.77391	2.70701	2.29297		13010	3.15994	2.92904	2.65356	2.08563				13000	3.16938	3.16653
13020	3.18776	2.78008	2.70253	2.30024		13020	3.16721	2.94235	2.66014	2.08054				13010	3.18435	3.15994
13030	3.1709	2.75691	2.69317	2.29249		13030	3.173	2.94979	2.66533	2.081				13020	3.18776	3.16721
13040	3.17702	2.75184	2.70999	2.2957		13040	3.17666	2.95164	2.66514	2.08978				13030	3.1709	3.173
13050	3.18117	2.76007	2.71742	2.2885		13050	3.18347	2.9583	2.67318	2.09082				13040	3.17702	3.17666
13060	3.16998	2.75927	2.69543	2.28442		13060	3.19041	2.96606	2.67351	2.10053				13050	3.18117	3.18347
13070	3.1685	2.7571	2.70232	2.27479		13070	3.18779	2.96509	2.67101	2.09712				13060	3.16998	3.19041
13080	3.17274	2.76725	2.70662	2.26917		13080	3.18535	2.95994	2.67061	2.09749				13070	3.1685	3.18779
13090	3.18383	2.77422	2.71337	2.28362		13090	3.17585	2.94636	2.66081	2.10027				13080	3.17274	3.18535
13100	3.18148	2.76758	2.71837	2.27917		13100	3.1801	2.95387	2.66148	2.10174				13090	3.18383	3.17585
13110	3.18895	2.77545	2.73041	2.27606		13110	3.18226	2.9562	2.66382	2.10202				13100	3.18148	3.1801
13120	3.19595	2.7816	2.74876	2.2661		13120	3.17941	2.95507	2.65199	2.10993				13110	3.18895	3.18226
13130	3.17977	2.76885	2.72854	2.26062		13130	3.18508	2.95906	2.66786	2.10143				13120	3.19595	3.17941
13140	3.18703	2.7943	2.72032	2.25967		13140	3.16897	2.94123	2.65037	2.09986				13130	3.17977	3.18508
13150	3.18909	2.78856	2.7333	2.2569		13150	3.18408	2.95777	2.67342	2.09311				13140	3.18703	3.16897
13160	3.1783	2.77647	2.72335	2.2534		13160	3.18063	2.95416	2.66884	2.09358				13150	3.18909	3.18408
13170	3.18397	2.78185	2.72492	2.26084		13170	3.18735	2.96323	2.67951	2.08754				13160	3.1783	3.18063
13180	3.17995	2.79223	2.70842	2.25657		13180	3.18248	2.95687	2.67305	2.08998				13170	3.18397	3.18735
13190	3.18415	2.79774	2.70247	2.26869		13190	3.1806	2.9547	2.66872	2.09288				13180	3.17995	3.18248
13200	3.17672	2.79974	2.70254	2.24517		13200	3.17926	2.95405	2.66764	2.09109				13190	3.18415	3.1806
13210	3.19019	2.80703	2.71249	2.26223		13210	3.16974	2.94438	2.66562	2.07837				13200	3.17672	3.17926
13220	3.18363	2.80243	2.71115	2.25101		13220	3.17591	2.95264	2.67525	2.07311				13210	3.19019	3.16974
13230	3.17994	2.803	2.69723	2.25657		13230	3.17343	2.94749	2.66975	2.07993				13220	3.18363	3.17591
13240	3.17901	2.7978	2.70581	2.25014		13240	3.17485	2.94875	2.66977	2.08244				13230	3.17994	3.17343
13250	3.17499	2.79677	2.70468	2.24142		13250	3.17858	2.95436	2.6656	2.09119				13240	3.17901	3.17485
13260	3.17051	2.78062	2.708	2.24481		13260	3.1785	2.95343	2.6681	2.08906				13250	3.17499	3.17858
13270	3.17865	2.78549	2.71554	2.25266		13270	3.17938	2.95338	2.67159	2.08735				13260	3.17051	3.1785
13280	3.17265	2.77654	2.7119	2.25118		13280	3.18859	2.96476	2.68682	2.07977				13270	3.17865	3.17938
13290	3.1767	2.78012	2.71021	2.2602		13290	3.19023	2.96403	2.69393	2.07663				13280	3.17265	3.18859
13300	3.17891	2.77528	2.71315	2.26884		13300	3.18243	2.95695	2.67912	2.08195				13290	3.1767	3.19023
13310	3.17541	2.77407	2.7086	2.26593		13310	3.17375	2.9468	2.66558	2.08721				13300	3.17891	3.18243
13320	3.17373	2.77281	2.70482	2.26729		13320	3.17966	2.95187	2.67641	2.08417				13310	3.17541	3.17375
13330	3.16964	2.76765	2.70564	2.26117		13330	3.18235	2.95228	2.68082	2.08613				13320	3.17373	3.17966
13340	3.16398	2.75825	2.70148	2.26178		13340	3.18087	2.95073	2.67528	2.09091				13330	3.16964	3.18235
13350	3.16955	2.76987	2.70389	2.26028		13350	3.18388	2.9527	2.68192	2.08877				13340	3.16398	3.18087
13360	3.1802	2.78068	2.71067	2.2688		13360	3.17533	2.94184	2.6737	2.08863				13350	3.16955	3.18388
13370	3.17424	2.77962	2.70334	2.26215		13370	3.17127	2.93861	2.67287	2.08189				13360	3.1802	3.17533
13380	3.18591	2.79252	2.7114	2.2694		13380	3.17235	2.94218	2.67943	2.07169				13370	3.17424	3.17127
13390	3.18317	2.78741	2.70758	2.27255		13390	3.17521	2.94789	2.67871	2.07326				13380	3.18591	3.17235
13400	3.1817	2.77713	2.71373	2.27367		13400	3.18378	2.95779	2.68569	2.0764				13390	3.18317	3.17521
13410	3.18236	2.78407	2.70982	2.27172		13410	3.17515	2.9504	2.67336	2.07641				13400	3.1817	3.18378
13420	3.17101	2.77785	2.69909	2.26031		13420	3.17615	2.94714	2.67975	2.07584				13410	3.18236	3.17515
13430	3.17009	2.78046	2.69437	2.26017		13430	3.1712	2.94448	2.67142	2.07523				13420	3.17101	3.17615
13440	3.16462	2.76939	2.69006	2.26357		13440	3.18112	2.9572	2.68634	2.06823				13430	3.17009	3.1712
13450	3.17233	2.78143	2.69781	2.26116		13450	3.17391	2.94549	2.68719	2.06167				13440	3.16462	3.18112
13460	3.17433	2.7849	2.69701	2.26346		13460	3.17224	2.94816	2.67559	2.06781				13450	3.17233	3.17391
13470	3.17697	2.77946	2.70028	2.27361		13470	3.18556	2.95944	2.68777	2.07682				13460	3.17433	3.17224
13480	3.17116	2.77411	2.69253	2.27312		13480	3.17456	2.94824	2.6801	2.06896				13470	3.17697	3.18556
13490	3.1624	2.76573	2.68752	2.26483		13490	3.17969	2.95032	2.68919	2.06995				13480	3.17116	3.17456
13500	3.17013	2.77479	2.70358	2.25623		13500	3.18824	2.96104	2.7007	2.06596				13490	3.1624	3.17969
13510	3.18525	2.80117	2.71102	2.25731		13510	3.17912	2.94928	2.69645	2.06023				13500	3.17013	3.18824
13520	3.18056	2.79677	2.70054	2.2621		13520	3.1894	2.95996	2.70163	2.06987				13510	3.18525	3.17912
13530	3.17605	2.79981	2.69344	2.25411		13530	3.18314	2.95366	2.6981	2.06421				13520	3.18056	3.1894
13540	3.18187	2.7984	2.69904	2.26555		13540	3.17119	2.93562	2.68676	2.06795				13530	3.17605	3.18314
13550	3.18238	2.79404	2.70299	2.26767		13550	3.17117	2.93562	2.68301	2.07275				13540	3.18187	3.17119
13560	3.17247	2.78707	2.68687	2.26763		13560	3.18697	2.95431	2.70122	2.07099				13550	3.18238	3.17117
13570	3.18132	2.79627	2.70283	2.26212		13570	3.18379	2.95091	2.69902	2.06894				13560	3.17247	3.18697
13580	3.17897	2.78946	2.69741	2.27039		13580	3.18825	2.95437	2.70936	2.0642				13570	3.18132	3.18379
13590	3.17695	2.78156	2.69377	2.27872		13590	3.18501	2.95214	2.70601	2.0618				13580	3.17897	3.18825
13600	3.17977	2.78553	2.70842	2.26433		13600	3.1794	2.94557	2.70197	2.05916				13590	3.17695	3.18501
13610	3.16697	2.76615	2.69988	2.2624		13610	3.19028	2.96088	2.70505	2.06681				13600	3.17977	3.1794
13620	3.18324	2.7814	2.71266	2.27405		13620	3.18505	2.95287	2.70774	2.0586				13610	3.16697	3.19028
13630	3.18152	2.77446	2.70723	2.28416		13630	3.18569	2.95697	2.70856	2.05359				13620	3.18324	3.18505
13640	3.18716	2.78129	2.71134	2.28672		13640	3.17627	2.94236	2.69818	2.05905				13630	3.18152	3.18569
13650	3.17829	2.77116	2.70661	2.2799		13650	3.18291	2.94945	2.70859	2.05574				13640	3.18716	3.17627
13660	3.1794	2.78066	2.7092	2.26833		13660	3.1771	2.9461	2.70133	2.05212				13650	3.17829	3.18291
13670	3.18146	2.78876	2.70407	2.27028		13670	3.18911	2.96168	2.70339	2.06422				13660	3.1794	3.1771
13680	3.18272	2.80788	2.70105	2.25377		13680	3.19613	2.9703	2.71634	2.05651				13670	3.18146	3.18911
13690	3.18896	2.81889	2.7073	2.25017		13690	3.19586	2.97228	2.70913	2.06233				13680	3.18272	3.19613
13700	3.19124	2.82349	2.70611	2.2523		13700	3.18833	2.96436	2.70408	2.05706				13690	3.18896	3.19586
13710	3.18167	2.80583	2.70155	2.25277		13710	3.19067	2.96645	2.70954	2.05412				13700	3.19124	3.18833
13720	3.1765	2.79623	2.70087	2.25092		13720	3.19666	2.9735	2.71274	2.0583				13710	3.18167	3.19067
13730	3.18098	2.79815	2.71285	2.24679		13730	3.18727	2.96366	2.70007	2.06003				13720	3.1765	3.19666
13740	3.17796	2.79598	2.71097	2.24321		13740	3.18677	2.96249	2.69656	2.06475				13730	3.18098	3.18727
13750	3.17676	2.79009	2.70004	2.26027		13750	3.18817	2.96401	2.70427	2.05679				13740	3.17796	3.18677
13760	3.17782	2.79641	2.70086	2.25443		13760	3.18241	2.95849	2.69371	2.06077				13750	3.17676	3.18817
13770	3.17784	2.792	2.7068	2.25285		13770	3.18068	2.95591	2.69143	2.0621				13760	3.17782	3.18241
13780	3.17581	2.79451	2.70889	2.24148		13780	3.17538	2.95328	2.68818	2.05374				13770	3.17784	3.18068
13790	3.17762	2.78543	2.71067	2.25572		13790	3.1822	2.96132	2.6954	2.05382				13780	3.17581	3.17538
13800	3.18008	2.79154	2.71144	2.25415		13800	3.17364	2.95285	2.68375	2.05477				13790	3.17762	3.1822
13810	3.1687	2.78339	2.7022	2.24325		13810	3.17348	2.94775	2.68064	2.06564				13800	3.18008	3.17364
13820	3.17349	2.78933	2.70235	2.24923		13820	3.18847	2.97203	2.70229	2.04874				13810	3.1687	3.17348
13830	3.17465	2.79337	2.70396	2.24556		13830	3.17836	2.9549	2.69169	2.05603				13820	3.17349	3.18847
13840	3.18256	2.80663	2.71109	2.24281		13840	3.19234	2.97345	2.6999	2.06186				13830	3.17465	3.17836
13850	3.17253	2.79587	2.69776	2.24391		13850	3.18041	2.95851	2.68913	2.06054				13840	3.18256	3.19234
13860	3.17482	2.80226	2.70241	2.2368		13860	3.17963	2.9563	2.69444	2.05435				13850	3.17253	3.18041
13870	3.18178	2.81007	2.70012	2.24949		13870	3.18671	2.96618	2.7009	2.05358				13860	3.17482	3.17963
13880	3.18165	2.82054	2.69234	2.24536		13880	3.17566	2.95569	2.69415	2.0433				13870	3.18178	3.18671
13890	3.18797	2.83419	2.70214	2.23431		13890	3.17278	2.952	2.68695	2.04917				13880	3.18165	3.17566
13900	3.18207	2.82865	2.69929	2.22792		13900	3.17842	2.95849	2.68981	2.05351				13890	3.18797	3.17278
13910	3.17708	2.82052	2.69354	2.23096		13910	3.17489	2.95347	2.68427	2.05708				13900	3.18207	3.17842
13920	3.18652	2.82238	2.70534	2.24125		13920	3.17366	2.95389	2.6897	2.04557				13910	3.17708	3.17489
13930	3.17714	2.81691	2.69624	2.23243		13930	3.18201	2.95942	2.70367	2.04508				13920	3.18652	3.17366
13940	3.18408	2.82494	2.70405	2.23262		13940	3.18779	2.96976	2.70867	2.04148				13930	3.17714	3.18201
13950	3.18222	2.82497	2.70187	2.22992		13950	3.18726	2.96871	2.70776	2.04258				13940	3.18408	3.18779
13960	3.19146	2.82361	2.71567	2.24126		13960	3.19042	2.97307	2.7187	2.03153				13950	3.18222	3.18726
13970	3.18724	2.81483	2.71123	2.24566		13970	3.1883	2.97105	2.71125	2.03776				13960	3.19146	3.19042
13980	3.18288	2.81222	2.71013	2.23786		13980	3.18177	2.95701	2.70283	2.04893				13970	3.18724	3.1883
13990	3.18707	2.81979	2.70993	2.24052		13990	3.1776	2.95446	2.69511	2.04982				13980	3.18288	3.18177
14000	3.1888	2.81639	2.72315	2.23367		14000	3.18372	2.96098	2.70795	2.04249				13990	3.18707	3.1776
14010	3.1871	2.80763	2.72048	2.24308		14010	3.18702	2.96333	2.71058	2.04588				14000	3.1888	3.18372
14020	3.18585	2.81056	2.72219	2.23377		14020	3.17523	2.9496	2.70463	2.03691				14010	3.1871	3.18702
14030	3.18404	2.80686	2.71933	2.23673		14030	3.1763	2.9516	2.70405	2.03812				14020	3.18585	3.17523
14040	3.17799	2.8008	2.71362	2.23405		14040	3.17332	2.94997	2.70458	2.03047				14030	3.18404	3.1763
14050	3.18621	2.81642	2.71301	2.23858		14050	3.17783	2.95233	2.7129	2.03007				14040	3.17799	3.17332
14060	3.18287	2.80726	2.71865	2.23372		14060	3.1789	2.95438	2.70879	2.0359				14050	3.18621	3.17783
14070	3.18804	2.81346	2.71669	2.24304		14070	3.19035	2.96419	2.72329	2.03813				14060	3.18287	3.1789
14080	3.18711	2.80541	2.716	2.25129		14080	3.17713	2.95108	2.70776	2.03653				14070	3.18804	3.19035
14090	3.18976	2.80482	2.73298	2.23895		14090	3.18704	2.9617	2.72033	2.03535				14080	3.18711	3.17713
14100	3.18707	2.79912	2.72741	2.24522		14100	3.18011	2.95252	2.70685	2.04493				14090	3.18976	3.18704
14110	3.18184	2.79301	2.71773	2.24971		14110	3.17907	2.95145	2.70315	2.04815				14100	3.18707	3.18011
14120	3.19091	2.81021	2.71747	2.2543		14120	3.17843	2.95289	2.70602	2.04025				14110	3.18184	3.17907
14130	3.18407	2.79916	2.71607	2.2504		14130	3.1826	2.95511	2.70998	2.0448				14120	3.19091	3.17843
14140	3.18485	2.79907	2.71843	2.24987		14140	3.18385	2.95891	2.70542	2.04923				14130	3.18407	3.1826
14150	3.1815	2.79478	2.70813	2.25814		14150	3.17761	2.9522	2.70307	2.04263				14140	3.18485	3.18385
14160	3.18408	2.79388	2.71791	2.25477		14160	3.18307	2.96026	2.70085	2.05087				14150	3.1815	3.17761
14170	3.17649	2.78315	2.71399	2.25134		14170	3.17792	2.95195	2.69629	2.05291				14160	3.18408	3.18307
14180	3.17706	2.77412	2.71767	2.25963		14180	3.16997	2.94401	2.69253	2.04464				14170	3.17649	3.17792
14190	3.18654	2.78916	2.71993	2.2651		14190	3.16901	2.94422	2.68859	2.04653				14180	3.17706	3.16997
14200	3.18996	2.7885	2.72123	2.27397		14200	3.18103	2.96094	2.6947	2.05168				14190	3.18654	3.16901
14210	3.18386	2.78259	2.71701	2.26912		14210	3.17791	2.95497	2.69032	2.05633				14200	3.18996	3.18103
14220	3.18649	2.77661	2.72048	2.27967		14220	3.16856	2.94513	2.67682	2.05923				14210	3.18386	3.17791
14230	3.18262	2.76672	2.71948	2.28206		14230	3.17419	2.95119	2.67531	2.0698				14220	3.18649	3.16856
14240	3.1807	2.76749	2.71327	2.28317		14240	3.17233	2.95076	2.67989	2.05878				14230	3.18262	3.17419
14250	3.18093	2.76699	2.7081	2.29055		14250	3.17795	2.95742	2.68399	2.06123				14240	3.1807	3.17233
14260	3.18469	2.76184	2.7154	2.29857		14260	3.18008	2.95934	2.69083	2.0561				14250	3.18093	3.17795
14270	3.19214	2.76938	2.72307	2.30106		14270	3.17501	2.95211	2.68166	2.06281				14260	3.18469	3.18008
14280	3.18749	2.76518	2.71895	2.2981		14280	3.17217	2.94717	2.68526	2.05643				14270	3.19214	3.17501
14290	3.1873	2.76077	2.72924	2.29067		14290	3.18131	2.96037	2.69259	2.05614				14280	3.18749	3.17217
14300	3.1776	2.75808	2.715	2.28389		14300	3.17516	2.95418	2.68966	2.04983				14290	3.1873	3.18131
14310	3.17049	2.74395	2.70918	2.28802		14310	3.17549	2.95413	2.68713	2.05427				14300	3.1776	3.17516
14320	3.17143	2.73666	2.70794	2.30082		14320	3.17558	2.95431	2.68487	2.0572				14310	3.17049	3.17549
14330	3.16971	2.73156	2.70788	2.3022		14330	3.16804	2.94484	2.68221	2.05099				14320	3.17143	3.17558
14340	3.17399	2.72811	2.71722	2.30707		14340	3.17461	2.95563	2.69099	2.0443				14330	3.16971	3.16804
14350	3.1807	2.72863	2.72063	2.32088		14350	3.17809	2.95513	2.69379	2.05212				14340	3.17399	3.17461
14360	3.16744	2.719	2.70836	2.31024		14360	3.182	2.96073	2.68804	2.06368				14350	3.1807	3.17809
14370	3.16926	2.72517	2.71071	2.3052		14370	3.17609	2.95384	2.68711	2.05654				14360	3.16744	3.182
14380	3.18345	2.74636	2.72006	2.30813		14380	3.17635	2.95075	2.68956	2.05859				14370	3.16926	3.17609
14390	3.17416	2.7376	2.71057	2.30412		14390	3.17553	2.95291	2.68522	2.0586				14380	3.18345	3.17635
14400	3.17738	2.74061	2.71862	2.29994		14400	3.16454	2.93986	2.67096	2.06201				14390	3.17416	3.17553
14410	3.17495	2.73759	2.71845	2.297		14410	3.17243	2.94843	2.67544	2.0682				14400	3.17738	3.16454
14420	3.17733	2.73914	2.71447	2.30643		14420	3.18581	2.96164	2.68319	2.08037				14410	3.17495	3.17243
14430	3.18633	2.74389	2.73087	2.30624		14430	3.18026	2.95927	2.67677	2.07502				14420	3.17733	3.18581
14440	3.17927	2.74423	2.7174	2.30226		14440	3.18203	2.96309	2.68123	2.06923				14430	3.18633	3.18026
14450	3.17831	2.75159	2.72207	2.28527		14450	3.19039	2.96809	2.69662	2.06782				14440	3.17927	3.18203
14460	3.17251	2.74537	2.72283	2.2757		14460	3.17875	2.95647	2.68438	2.06454				14450	3.17831	3.19039
14470	3.1718	2.75609	2.71431	2.27094		14470	3.19345	2.97437	2.70008	2.06372				14460	3.17251	3.17875
14480	3.17993	2.77188	2.7297	2.25595		14480	3.185	2.96271	2.69978	2.05475				14470	3.1718	3.19345
14490	3.17856	2.7774	2.71579	2.26208		14490	3.18134	2.95959	2.69074	2.05976				14480	3.17993	3.185
14500	3.18128	2.77409	2.72407	2.26384		14500	3.18332	2.95939	2.6976	2.05719				14490	3.17856	3.18134
14510	3.18715	2.7687	2.73804	2.2701		14510	3.17256	2.94562	2.68902	2.05492				14500	3.18128	3.18332
14520	3.18569	2.77644	2.73552	2.25954		14520	3.17423	2.94982	2.68326	2.06159				14510	3.18715	3.17256
14530	3.18485	2.77492	2.73842	2.25554		14530	3.18307	2.9612	2.69611	2.05575				14520	3.18569	3.17423
14540	3.1877	2.77067	2.74696	2.25842		14540	3.18034	2.96233	2.69717	2.04427				14530	3.18485	3.18307
14550	3.17857	2.76885	2.73211	2.25291		14550	3.17763	2.95799	2.69114	2.05004				14540	3.1877	3.18034
14560	3.17237	2.76716	2.72489	2.24625		14560	3.18557	2.96614	2.69979	2.05156				14550	3.17857	3.17763
14570	3.17907	2.78216	2.72781	2.24312		14570	3.19013	2.97611	2.70844	2.03985				14560	3.17237	3.18557
14580	3.18068	2.78273	2.7312	2.24286		14580	3.1899	2.9739	2.70095	2.05224				14570	3.17907	3.19013
14590	3.1894	2.79706	2.72845	2.25313		14590	3.18533	2.96581	2.70054	2.05029				14580	3.18068	3.1899
14600	3.1801	2.78657	2.7288	2.23935		14600	3.17742	2.95664	2.68793	2.05555				14590	3.1894	3.18533
14610	3.17912	2.78386	2.73014	2.23832		14610	3.1756	2.9562	2.68856	2.04972				14600	3.1801	3.17742
14620	3.18931	2.79328	2.73573	2.24873		14620	3.18035	2.95973	2.68624	2.06238				14610	3.17912	3.1756
14630	3.19443	2.79963	2.74124	2.24866		14630	3.18584	2.96758	2.68478	2.06993				14620	3.18931	3.18035
14640	3.18815	2.79851	2.74019	2.23346		14640	3.18429	2.96625	2.68393	2.06814				14630	3.19443	3.18584
14650	3.18579	2.79935	2.73585	2.23099		14650	3.17832	2.95795	2.67533	2.07282				14640	3.18815	3.18429
14660	3.18868	2.79821	2.74275	2.23221		14660	3.19227	2.97309	2.69165	2.07291				14650	3.18579	3.17832
14670	3.18944	2.79017	2.7459	2.24053		14670	3.18474	2.96285	2.67969	2.07989				14660	3.18868	3.19227
14680	3.18477	2.79122	2.75398	2.2159		14680	3.17278	2.95077	2.66775	2.07586				14670	3.18944	3.18474
14690	3.19678	2.80493	2.76248	2.22258		14690	3.18709	2.96694	2.67764	2.08389				14680	3.18477	3.17278
14700	3.19804	2.80487	2.76427	2.22407		14700	3.189	2.96989	2.69374	2.06469				14690	3.19678	3.18709
14710	3.19619	2.8029	2.76411	2.22141		14710	3.18536	2.96497	2.68588	2.07077				14700	3.19804	3.189
14720	3.19115	2.80242	2.75178	2.22283		14720	3.18356	2.96105	2.68964	2.06593				14710	3.19619	3.18536
14730	3.19245	2.80813	2.75243	2.21856		14730	3.1866	2.96359	2.69526	2.06436				14720	3.19115	3.18356
14740	3.18174	2.80047	2.73825	2.21503		14740	3.18367	2.96047	2.69993	2.05366				14730	3.19245	3.1866
14750	3.18531	2.80906	2.73938	2.21299		14750	3.18219	2.95846	2.69648	2.05651				14740	3.18174	3.18367
14760	3.1794	2.80225	2.73333	2.21212		14760	3.1852	2.96634	2.69605	2.05503				14750	3.18531	3.18219
14770	3.17773	2.79832	2.73682	2.20797		14770	3.18292	2.96313	2.68739	2.06391				14760	3.1794	3.1852
14780	3.18725	2.80534	2.73856	2.22429		14780	3.18423	2.96269	2.68897	2.06655				14770	3.17773	3.18292
14790	3.18205	2.79764	2.73518	2.22324		14790	3.18604	2.96784	2.68293	2.07256				14780	3.18725	3.18423
14800	3.18545	2.80689	2.74019	2.21514		14800	3.1774	2.95703	2.68778	2.05515				14790	3.18205	3.18604
14810	3.18401	2.80433	2.74121	2.21299		14810	3.18482	2.96821	2.68972	2.05943				14800	3.18545	3.1774
14820	3.18301	2.81137	2.73071	2.21416		14820	3.17846	2.96089	2.68582	2.05542				14810	3.18401	3.18482
14830	3.18308	2.82016	2.72547	2.20963		14830	3.19701	2.98102	2.69761	2.06838				14820	3.18301	3.17846
14840	3.18154	2.8142	2.72628	2.2118		14840	3.18347	2.96816	2.68638	2.0597				14830	3.18308	3.19701
14850	3.18553	2.82237	2.74156	2.19393		14850	3.18109	2.96492	2.68917	2.05334				14840	3.18154	3.18347
14860	3.19226	2.83125	2.74925	2.19243		14860	3.18302	2.96526	2.69001	2.05774				14850	3.18553	3.18109
14870	3.18566	2.8213	2.74573	2.19046		14870	3.18599	2.96889	2.69112	2.06026				14860	3.19226	3.18302
14880	3.19332	2.8286	2.75245	2.19489		14880	3.17567	2.95549	2.68117	2.06062				14870	3.18566	3.18599
14890	3.19537	2.83334	2.75192	2.19542		14890	3.18811	2.97034	2.69482	2.05987				14880	3.19332	3.17567
14900	3.19158	2.8307	2.74016	2.20251		14900	3.17797	2.95687	2.69078	2.05321				14890	3.19537	3.18811
14910	3.18993	2.83813	2.74049	2.18772		14910	3.17958	2.95937	2.67923	2.06962				14900	3.19158	3.17797
14920	3.1882	2.83542	2.73847	2.18871		14920	3.17618	2.95271	2.67988	2.06785				14910	3.18993	3.17958
14930	3.17648	2.8255	2.71809	2.19286		14930	3.19406	2.97372	2.69649	2.07122				14920	3.1882	3.17618
14940	3.18213	2.83917	2.72297	2.18551		14940	3.18015	2.9608	2.67995	2.0684				14930	3.17648	3.19406
14950	3.17821	2.82895	2.7158	2.19625		14950	3.18026	2.95702	2.68303	2.07015				14940	3.18213	3.18015
14960	3.18234	2.84024	2.71889	2.1898		14960	3.17763	2.95746	2.67643	2.07				14950	3.17821	3.18026
14970	3.18083	2.83963	2.70745	2.20038		14970	3.17811	2.95697	2.68259	2.06418				14960	3.18234	3.17763
14980	3.18552	2.8459	2.71777	2.19309		14980	3.17456	2.95525	2.68124	2.05744				14970	3.18083	3.17811
14990	3.18801	2.8432	2.72349	2.19674		14990	3.18289	2.96698	2.68871	2.05654				14980	3.18552	3.17456
15000	3.18043	2.84162	2.7186	2.1828		15000	3.18808	2.97338	2.69578	2.05414				14990	3.18801	3.18289
15010	3.1828	2.84643	2.71468	2.18832		15010	3.17955	2.96475	2.68594	2.05305				15000	3.18043	3.18808
15020	3.18392	2.85231	2.70754	2.19277		15020	3.18203	2.96644	2.6874	2.0564				15010	3.1828	3.17955
15030	3.17955	2.84858	2.70095	2.19307		15030	3.19066	2.97652	2.69314	2.06105				15020	3.18392	3.18203
15040	3.17313	2.84379	2.69537	2.18753		15040	3.18374	2.96594	2.68826	2.06126				15030	3.17955	3.19066
15050	3.17756	2.85203	2.69962	2.18445		15050	3.1851	2.96599	2.69266	2.05965				15040	3.17313	3.18374
15060	3.17889	2.85326	2.70242	2.18323		15060	3.18907	2.96822	2.69756	2.06233				15050	3.17756	3.1851
15070	3.17548	2.84802	2.70131	2.18152		15070	3.19064	2.97359	2.69651	2.06083				15060	3.17889	3.18907
15080	3.17497	2.84254	2.71029	2.17606		15080	3.19533	2.97832	2.70289	2.06015				15070	3.17548	3.19064
15090	3.18723	2.85559	2.72027	2.18233		15090	3.18036	2.96023	2.68979	2.05706				15080	3.17497	3.19533
15100	3.17808	2.85132	2.71185	2.1717		15100	3.18442	2.96499	2.6927	2.05896				15090	3.18723	3.18036
15110	3.18194	2.85335	2.71645	2.17458		15110	3.1871	2.96694	2.69878	2.05646				15100	3.17808	3.18442
15120	3.17794	2.8437	2.71117	2.18208		15120	3.1882	2.963	2.68911	2.07812				15110	3.18194	3.1871
15130	3.18189	2.84251	2.72507	2.17783		15130	3.18133	2.95697	2.67658	2.08183				15120	3.17794	3.1882
15140	3.17875	2.84504	2.71888	2.17308		15140	3.16944	2.94261	2.65777	2.08998				15130	3.18189	3.18133
15150	3.16979	2.83915	2.70735	2.16901		15150	3.17329	2.94792	2.67081	2.07751				15140	3.17875	3.16944
15160	3.1707	2.84188	2.71021	2.16452		15160	3.18062	2.96039	2.68243	2.06722				15150	3.16979	3.17329
15170	3.1718	2.84033	2.71295	2.16635		15170	3.17122	2.94638	2.67148	2.07253				15160	3.1707	3.18062
15180	3.17601	2.85014	2.7121	2.16685		15180	3.1804	2.95369	2.68246	2.07608				15170	3.1718	3.17122
15190	3.17192	2.8432	2.71436	2.16115		15190	3.17239	2.94616	2.67113	2.07685				15180	3.17601	3.1804
15200	3.16664	2.83863	2.70091	2.16852		15200	3.18053	2.95364	2.67927	2.08064				15190	3.17192	3.17239
15210	3.16756	2.839	2.69786	2.17452		15210	3.17419	2.94784	2.67361	2.07679				15200	3.16664	3.18053
15220	3.16007	2.82826	2.69466	2.17068		15220	3.18404	2.95775	2.68413	2.07926				15210	3.16756	3.17419
15230	3.16263	2.83052	2.70277	2.1651		15230	3.1794	2.95538	2.67344	2.08221				15220	3.16007	3.18404
15240	3.16569	2.8255	2.70498	2.17779		15240	3.1802	2.95583	2.67364	2.08375				15230	3.16263	3.1794
15250	3.17022	2.83214	2.71115	2.17468		15250	3.18384	2.9601	2.67262	2.09012				15240	3.16569	3.1802
15260	3.16255	2.8214	2.71216	2.16501		15260	3.18334	2.96254	2.67526	2.08173				15250	3.17022	3.18384
15270	3.16622	2.82285	2.71512	2.17014		15270	3.17309	2.94878	2.67811	2.06625				15260	3.16255	3.18334
15280	3.16961	2.82571	2.72419	2.16495		15280	3.17893	2.95428	2.68275	2.07035				15270	3.16622	3.17309
15290	3.18314	2.83319	2.74139	2.17316		15290	3.17721	2.94819	2.67058	2.08936				15280	3.16961	3.17893
15300	3.18576	2.83525	2.73335	2.18821		15300	3.17327	2.94535	2.66626	2.08693				15290	3.18314	3.17721
15310	3.17388	2.82335	2.71945	2.18639		15310	3.16682	2.9381	2.65787	2.08827				15300	3.18576	3.17327
15320	3.17953	2.82945	2.71458	2.20093		15320	3.17809	2.95273	2.67447	2.08064				15310	3.17388	3.16682
15330	3.17616	2.81695	2.71326	2.20883		15330	3.17909	2.95432	2.6768	2.07846				15320	3.17953	3.17809
15340	3.18975	2.83593	2.72493	2.20937		15340	3.17959	2.95511	2.68027	2.07438				15330	3.17616	3.17909
15350	3.18252	2.82919	2.71703	2.20687		15350	3.17664	2.95446	2.67798	2.06922				15340	3.18975	3.17959
15360	3.1737	2.82315	2.70215	2.20749		15360	3.17713	2.95435	2.6839	2.06321				15350	3.18252	3.17664
15370	3.17999	2.82729	2.71286	2.20713		15370	3.17694	2.95226	2.67482	2.07736				15360	3.1737	3.17713
15380	3.17494	2.82563	2.70511	2.20423		15380	3.17082	2.94688	2.6686	2.07428				15370	3.17999	3.17694
15390	3.17334	2.8237	2.70594	2.20109		15390	3.18338	2.95944	2.67381	2.08811				15380	3.17494	3.17082
15400	3.18412	2.83855	2.70782	2.21079		15400	3.18189	2.95814	2.67729	2.08095				15390	3.17334	3.18338
15410	3.18227	2.83996	2.70209	2.21066		15410	3.17062	2.94847	2.67222	2.06672				15400	3.18412	3.18189
15420	3.18617	2.84153	2.70538	2.21586		15420	3.17756	2.95448	2.68183	2.06703				15410	3.18227	3.17062
15430	3.18373	2.84737	2.70087	2.20683		15430	3.18017	2.95786	2.68361	2.06792				15420	3.18617	3.17756
15440	3.19061	2.84775	2.70543	2.22056		15440	3.17858	2.95835	2.68606	2.05914				15430	3.18373	3.18017
15450	3.18467	2.84676	2.69187	2.22126		15450	3.17736	2.95733	2.68722	2.05532				15440	3.19061	3.17858
15460	3.18094	2.84277	2.69144	2.21622		15460	3.17507	2.95318	2.67411	2.07125				15450	3.18467	3.17736
15470	3.17738	2.83624	2.6845	2.22276		15470	3.17878	2.95662	2.68569	2.06271				15460	3.18094	3.17507
15480	3.17304	2.82932	2.68541	2.21809		15480	3.17997	2.96024	2.6852	2.0618				15470	3.17738	3.17878
15490	3.18644	2.84486	2.69353	2.22677		15490	3.17521	2.95362	2.6767	2.06769				15480	3.17304	3.17997
15500	3.1824	2.83793	2.68806	2.23067		15500	3.16894	2.94648	2.66862	2.06907				15490	3.18644	3.17521
15510	3.18009	2.83644	2.68362	2.23129		15510	3.1656	2.94181	2.67087	2.06259				15500	3.1824	3.16894
15520	3.1809	2.83435	2.68351	2.2364		15520	3.1602	2.93612	2.66032	2.06776				15510	3.18009	3.1656
15530	3.18623	2.84239	2.69407	2.22866		15530	3.16954	2.94504	2.66983	2.0714				15520	3.1809	3.1602
15540	3.18209	2.83098	2.69512	2.2301		15540	3.1764	2.95541	2.6723	2.07448				15530	3.18623	3.16954
15550	3.18342	2.83085	2.69103	2.23898		15550	3.18257	2.95865	2.67663	2.08315				15540	3.18209	3.1764
15560	3.19293	2.83985	2.70936	2.23253		15560	3.16881	2.94701	2.65379	2.08691				15550	3.18342	3.18257
15570	3.19808	2.85082	2.71608	2.22513		15570	3.17362	2.95014	2.66408	2.08399				15560	3.19293	3.16881
15580	3.1762	2.8221	2.69873	2.22017		15580	3.16439	2.94064	2.66657	2.06608				15570	3.19808	3.17362
15590	3.18403	2.8344	2.70429	2.22014		15590	3.17174	2.94877	2.67223	2.06973				15580	3.1762	3.16439
15600	3.17891	2.82879	2.69922	2.21881		15600	3.17787	2.95607	2.68399	2.0629				15590	3.18403	3.17174
15610	3.17252	2.82629	2.69565	2.20801		15610	3.17331	2.94949	2.68266	2.05999				15600	3.17891	3.17787
15620	3.17802	2.82864	2.69968	2.21588		15620	3.17728	2.95741	2.68943	2.05206				15610	3.17252	3.17331
15630	3.16714	2.81742	2.68663	2.21488		15630	3.17532	2.95596	2.68984	2.04753				15620	3.17802	3.17728
15640	3.17952	2.82987	2.69505	2.22424		15640	3.16903	2.95013	2.68314	2.04524				15630	3.16714	3.17532
15650	3.16811	2.82177	2.68459	2.2146		15650	3.17411	2.95671	2.68619	2.04747				15640	3.17952	3.16903
15660	3.17751	2.82486	2.70135	2.2172		15660	3.18167	2.96521	2.69412	2.04826				15650	3.16811	3.17411
15670	3.18337	2.83108	2.71263	2.21231		15670	3.17617	2.96016	2.69382	2.03884				15660	3.17751	3.18167
15680	3.18193	2.82814	2.71351	2.21086		15680	3.17827	2.96209	2.69734	2.03793				15670	3.18337	3.17617
15690	3.18154	2.8209	2.71127	2.22169		15690	3.18278	2.96834	2.69642	2.04411				15680	3.18193	3.17827
15700	3.17066	2.81732	2.69464	2.21536		15700	3.18177	2.9642	2.69732	2.04581				15690	3.18154	3.18278
15710	3.18401	2.82782	2.70805	2.22389		15710	3.17863	2.96236	2.68361	2.05672				15700	3.17066	3.18177
15720	3.17782	2.82181	2.70531	2.21716		15720	3.18295	2.96587	2.68748	2.05995				15710	3.18401	3.17863
15730	3.17999	2.82297	2.70114	2.22695		15730	3.17832	2.96245	2.67995	2.06038				15720	3.17782	3.18295
15740	3.17864	2.81691	2.70497	2.22614		15740	3.17668	2.96125	2.67982	2.05721				15730	3.17999	3.17832
15750	3.17013	2.81157	2.69446	2.22135		15750	3.18426	2.97134	2.68363	2.06116				15740	3.17864	3.17668
15760	3.1736	2.81278	2.68866	2.23671		15760	3.18196	2.96597	2.68803	2.05602				15750	3.17013	3.18426
15770	3.17543	2.81373	2.69283	2.23569		15770	3.18922	2.97464	2.69698	2.05429				15760	3.1736	3.18196
15780	3.17122	2.79649	2.69014	2.24857		15780	3.18734	2.97331	2.69566	2.05211				15770	3.17543	3.18922
15790	3.17572	2.80902	2.69755	2.23674		15790	3.18711	2.97352	2.6959	2.05075				15780	3.17122	3.18734
15800	3.1696	2.80845	2.69405	2.22431		15800	3.18111	2.96665	2.68748	2.05314				15790	3.17572	3.18711
15810	3.17162	2.81001	2.70291	2.21732		15810	3.18485	2.96571	2.69095	2.06154				15800	3.1696	3.18111
15820	3.16476	2.7928	2.69759	2.22592		15820	3.17506	2.95648	2.67402	2.06662				15810	3.17162	3.18485
15830	3.1638	2.78665	2.69738	2.23113		15830	3.18432	2.96558	2.6904	2.06081				15820	3.16476	3.17506
15840	3.17259	2.78636	2.71332	2.23713		15840	3.17652	2.95725	2.68532	2.05532				15830	3.1638	3.18432
15850	3.17027	2.78517	2.71516	2.22978		15850	3.18189	2.96332	2.68066	2.0692				15840	3.17259	3.17652
15860	3.17211	2.78725	2.70804	2.24106		15860	3.18213	2.96159	2.69612	2.05228				15850	3.17027	3.18189
15870	3.16749	2.78283	2.69846	2.24504		15870	3.17832	2.95741	2.69072	2.05356				15860	3.17211	3.18213
15880	3.15872	2.76439	2.69006	2.25316		15880	3.18021	2.95642	2.68863	2.06356				15870	3.16749	3.17832
15890	3.16518	2.76818	2.70085	2.25372		15890	3.18946	2.96872	2.69926	2.06059				15880	3.15872	3.18021
15900	3.15929	2.75586	2.70461	2.24779		15900	3.19027	2.96907	2.69425	2.06913				15890	3.16518	3.18946
15910	3.17387	2.76166	2.71584	2.26812		15910	3.18258	2.96121	2.687	2.06613				15900	3.15929	3.19027
15920	3.16569	2.75098	2.70741	2.26829		15920	3.1823	2.96096	2.68959	2.06224				15910	3.17387	3.18258
15930	3.16618	2.75417	2.70913	2.26376		15930	3.18176	2.96179	2.68677	2.06308				15920	3.16569	3.1823
15940	3.17591	2.77686	2.71998	2.25024		15940	3.1721	2.95228	2.67794	2.05842				15930	3.16618	3.18176
15950	3.17813	2.77101	2.72158	2.26176		15950	3.18414	2.96643	2.6834	2.06813				15940	3.17591	3.1721
15960	3.16862	2.75852	2.71995	2.25229		15960	3.17488	2.95505	2.67237	2.07022				15950	3.17813	3.18414
15970	3.16831	2.75398	2.71731	2.26014		15970	3.18345	2.96631	2.68941	2.05836				15960	3.16862	3.17488
15980	3.16806	2.75673	2.7228	2.24944		15980	3.18294	2.96585	2.68987	2.05683				15970	3.16831	3.18345
15990	3.17266	2.77007	2.71847	2.25127		15990	3.18006	2.95794	2.68505	2.06559				15980	3.16806	3.18294
16000	3.1682	2.76655	2.72291	2.23762		16000	3.17834	2.95524	2.68644	2.06236				15990	3.17266	3.18006
16010	3.16872	2.76216	2.73174	2.23376		16010	3.177	2.95549	2.69142	2.05133				16000	3.1682	3.17834
16020	3.17242	2.77653	2.73109	2.22722		16020	3.17071	2.94694	2.68311	2.05507				16010	3.16872	3.177
16030	3.16231	2.76017	2.72424	2.22719		16030	3.17741	2.95415	2.68898	2.05775				16020	3.17242	3.17071
16040	3.16455	2.76593	2.72476	2.22576		16040	3.16916	2.94809	2.67473	2.05955				16030	3.16231	3.17741
16050	3.16661	2.77403	2.71968	2.22778		16050	3.17628	2.95729	2.68142	2.0596				16040	3.16455	3.16916
16060	3.16491	2.76629	2.72889	2.22128		16060	3.17876	2.95868	2.68639	2.05876				16050	3.16661	3.17628
16070	3.16546	2.76404	2.72791	2.22684		16070	3.18046	2.96193	2.68957	2.05519				16060	3.16491	3.17876
16080	3.16553	2.76695	2.73645	2.21292		16080	3.18399	2.96285	2.69748	2.05444				16070	3.16546	3.18046
16090	3.16749	2.76861	2.7338	2.21971		16090	3.18111	2.96255	2.69862	2.04443				16080	3.16553	3.18399
16100	3.16774	2.76549	2.73796	2.21919		16100	3.17779	2.96023	2.69709	2.03946				16090	3.16749	3.18111
16110	3.1632	2.75717	2.72483	2.2327		16110	3.18492	2.96569	2.70017	2.04966				16100	3.16774	3.17779
16120	3.17217	2.76002	2.74041	2.23557		16120	3.16828	2.94755	2.6748	2.05753				16110	3.1632	3.18492
16130	3.17183	2.75326	2.73794	2.24593		16130	3.18649	2.96675	2.69714	2.057				16120	3.17217	3.16828
16140	3.17314	2.75224	2.74758	2.23911		16140	3.1808	2.96083	2.68703	2.06116				16130	3.17183	3.18649
16150	3.17037	2.75183	2.74026	2.24073		16150	3.17713	2.95664	2.68289	2.06123				16140	3.17314	3.1808
16160	3.16971	2.74862	2.74092	2.242		16160	3.18685	2.97097	2.68253	2.07107				16150	3.17037	3.17713
16170	3.17261	2.7484	2.74467	2.24586		16170	3.18882	2.97052	2.70058	2.05427				16160	3.16971	3.18685
16180	3.17612	2.75289	2.74348	2.25176		16180	3.18352	2.96561	2.68821	2.06112				16170	3.17261	3.18882
16190	3.17988	2.75986	2.7451	2.25185		16190	3.18166	2.96253	2.68749	2.06077				16180	3.17612	3.18352
16200	3.17763	2.75436	2.73778	2.26113		16200	3.18033	2.96045	2.6898	2.05664				16190	3.17988	3.18166
16210	3.17693	2.75587	2.74605	2.24725		16210	3.18107	2.961	2.68903	2.05911				16200	3.17763	3.18033
16220	3.17733	2.75972	2.74406	2.24608		16220	3.18231	2.9609	2.69169	2.05963				16210	3.17693	3.18107
16230	3.1796	2.75923	2.74587	2.2509		16230	3.18635	2.96583	2.70045	2.05356				16220	3.17733	3.18231
16240	3.18083	2.75223	2.74547	2.26339		16240	3.18357	2.96347	2.69514	2.05531				16230	3.1796	3.18635
16250	3.18178	2.75135	2.751	2.26043		16250	3.17682	2.95661	2.67955	2.06465				16240	3.18083	3.18357
16260	3.1762	2.74739	2.74577	2.25589		16260	3.18064	2.96181	2.6811	2.06697				16250	3.18178	3.17682
16270	3.17823	2.73883	2.74284	2.27552		16270	3.17384	2.95263	2.67427	2.06804				16260	3.1762	3.18064
16280	3.17534	2.72733	2.75022	2.27235		16280	3.18137	2.96151	2.69185	2.05565				16270	3.17823	3.17384
16290	3.17876	2.72172	2.75751	2.27977		16290	3.18242	2.9627	2.68867	2.06132				16280	3.17534	3.18137
16300	3.17821	2.71884	2.76189	2.27637		16300	3.18686	2.96733	2.69508	2.06001				16290	3.17876	3.18242
16310	3.17279	2.72761	2.75088	2.26405		16310	3.17117	2.94924	2.68823	2.04646				16300	3.17821	3.18686
16320	3.16816	2.72702	2.74195	2.26265		16320	3.19209	2.97347	2.71256	2.04436				16310	3.17279	3.17117
16330	3.15837	2.71745	2.73108	2.25992		16330	3.20033	2.9838	2.72548	2.03788				16320	3.16816	3.19209
16340	3.1749	2.73192	2.75305	2.26216		16340	3.18093	2.95884	2.70342	2.0429				16330	3.15837	3.20033
16350	3.16303	2.7347	2.73392	2.24867		16350	3.18319	2.96274	2.70891	2.037				16340	3.1749	3.18093
16360	3.17324	2.74563	2.75128	2.24297		16360	3.18097	2.95903	2.70591	2.03946				16350	3.16303	3.18319
16370	3.17657	2.74856	2.75323	2.24641		16370	3.18547	2.96604	2.71191	2.03532				16360	3.17324	3.18097
16380	3.1595	2.72618	2.74334	2.23761		16380	3.18333	2.96259	2.7085	2.03819				16370	3.17657	3.18547
16390	3.15165	2.72332	2.73467	2.22954		16390	3.17732	2.95602	2.70149	2.03831				16380	3.1595	3.18333
16400	3.15657	2.72196	2.73637	2.243		16400	3.17291	2.9507	2.69225	2.04449				16390	3.15165	3.17732
16410	3.16876	2.73537	2.75576	2.23731		16410	3.16719	2.9447	2.69111	2.03686				16400	3.15657	3.17291
16420	3.16694	2.72688	2.75706	2.24094		16420	3.16911	2.94961	2.68643	2.04191				16410	3.16876	3.16719
16430	3.16426	2.72323	2.75703	2.23783		16430	3.16979	2.95111	2.68552	2.04304				16420	3.16694	3.16911
16440	3.16129	2.7206	2.75321	2.23734		16440	3.17127	2.95156	2.68746	2.04446				16430	3.16426	3.16979
16450	3.1579	2.72165	2.7486	2.23216		16450	3.18528	2.96708	2.70257	2.04562				16440	3.16129	3.17127
16460	3.15923	2.72017	2.75171	2.23387		16460	3.19217	2.97799	2.70768	2.04451				16450	3.1579	3.18528
16470	3.15875	2.71731	2.75323	2.23412		16470	3.18834	2.97184	2.70707	2.0423				16460	3.15923	3.19217
16480	3.17127	2.74035	2.75352	2.24111		16480	3.19072	2.97508	2.71162	2.03898				16470	3.15875	3.18834
16490	3.1572	2.72706	2.74493	2.22809		16490	3.17525	2.96226	2.69542	2.03082				16480	3.17127	3.19072
16500	3.16561	2.73527	2.74651	2.23989		16500	3.18326	2.96784	2.70608	2.03356				16490	3.1572	3.17525
16510	3.16462	2.73066	2.75038	2.238		16510	3.19222	2.97903	2.71174	2.03773				16500	3.16561	3.18326
16520	3.17618	2.74101	2.76316	2.24234		16520	3.1834	2.968	2.70475	2.03554				16510	3.16462	3.19222
16530	3.17632	2.73307	2.77277	2.24056		16530	3.18776	2.97462	2.70421	2.04022				16520	3.17618	3.1834
16540	3.19276	2.74251	2.79087	2.25326		16540	3.18129	2.9648	2.70867	2.02836				16530	3.17632	3.18776
16550	3.18977	2.73871	2.78666	2.2546		16550	3.18798	2.9743	2.72043	2.01971				16540	3.19276	3.18129
16560	3.18519	2.74229	2.77336	2.2537		16560	3.17626	2.95678	2.70449	2.02988				16550	3.18977	3.18798
16570	3.18005	2.72571	2.7698	2.26366		16570	3.18012	2.95904	2.71107	2.02991				16560	3.18519	3.17626
16580	3.16627	2.71568	2.75531	2.25475		16580	3.18567	2.96529	2.7148	2.0332				16570	3.18005	3.18012
16590	3.17923	2.72388	2.77253	2.26021		16590	3.18824	2.97	2.71788	2.03026				16580	3.16627	3.18567
16600	3.17067	2.7281	2.75915	2.2474		16600	3.1797	2.9625	2.70187	2.0358				16590	3.17923	3.18824
16610	3.16786	2.71649	2.75968	2.25289		16610	3.18506	2.96947	2.70814	2.03407				16600	3.17067	3.1797
16620	3.1614	2.71828	2.74456	2.25106		16620	3.17865	2.96067	2.69964	2.03815				16610	3.16786	3.18506
16630	3.17024	2.72734	2.74929	2.25917		16630	3.17186	2.95158	2.69041	2.04237				16620	3.1614	3.17865
16640	3.17626	2.7318	2.75928	2.25851		16640	3.1774	2.95886	2.69512	2.04284				16630	3.17024	3.17186
16650	3.16744	2.7157	2.75771	2.25507		16650	3.1764	2.95694	2.69292	2.04543				16640	3.17626	3.1774
16660	3.17642	2.72441	2.77058	2.25406		16660	3.17647	2.95832	2.69735	2.03779				16650	3.16744	3.1764
16670	3.18092	2.7278	2.77535	2.25679		16670	3.17673	2.95888	2.70495	2.02768				16660	3.17642	3.17647
16680	3.1793	2.71956	2.77365	2.26425		16680	3.16726	2.9503	2.68702	2.0344				16670	3.18092	3.17673
16690	3.17707	2.72537	2.76885	2.25686		16690	3.18016	2.9651	2.70743	2.02605				16680	3.1793	3.16726
16700	3.1833	2.72696	2.78416	2.25364		16700	3.16999	2.95271	2.69653	2.02681				16690	3.17707	3.18016
16710	3.19168	2.73665	2.79561	2.25143		16710	3.17907	2.96303	2.70921	2.02327				16700	3.1833	3.16999
16720	3.18218	2.72554	2.78456	2.25171		16720	3.17483	2.95819	2.70564	2.02181				16710	3.19168	3.17907
16730	3.18624	2.72113	2.79317	2.25785		16730	3.17266	2.95731	2.70112	2.02233				16720	3.18218	3.17483
16740	3.18877	2.72225	2.78356	2.27545		16740	3.17207	2.95404	2.70021	2.02648				16730	3.18624	3.17266
16750	3.19457	2.72707	2.78897	2.27933		16750	3.1786	2.96361	2.70258	2.0298				16740	3.18877	3.17207
16760	3.19001	2.72407	2.78123	2.27957		16760	3.17425	2.95787	2.69692	2.03209				16750	3.19457	3.1786
16770	3.19296	2.73101	2.78411	2.27603		16770	3.17686	2.95905	2.70914	2.02225				16760	3.19001	3.17425
16780	3.19181	2.72277	2.78959	2.27596		16780	3.16857	2.94918	2.69469	2.02993				16770	3.19296	3.17686
16790	3.19083	2.72583	2.78093	2.28016		16790	3.1709	2.95684	2.69451	2.0263				16780	3.19181	3.16857
16800	3.19317	2.73036	2.78486	2.27648		16800	3.17989	2.96636	2.71139	2.01805				16790	3.19083	3.1709
16810	3.19791	2.74141	2.78889	2.27155		16810	3.17151	2.95666	2.69342	2.02995				16800	3.19317	3.17989
16820	3.19364	2.7356	2.77865	2.27909		16820	3.17543	2.96099	2.70687	2.01794				16810	3.19791	3.17151
16830	3.18403	2.73438	2.76873	2.2657		16830	3.17511	2.95912	2.6956	2.0347				16820	3.19364	3.17543
16840	3.19997	2.7431	2.788	2.27642		16840	3.17958	2.96444	2.69331	2.04394				16830	3.18403	3.17511
16850	3.19295	2.73066	2.78366	2.27696		16850	3.17381	2.95963	2.6959	2.02951				16840	3.19997	3.17958
16860	3.1835	2.72349	2.77347	2.27152		16860	3.17338	2.9586	2.69611	2.02936				16850	3.19295	3.17381
16870	3.19209	2.73487	2.77165	2.28413		16870	3.17779	2.96379	2.70942	2.01783				16860	3.1835	3.17338
16880	3.17927	2.72551	2.75668	2.27769		16880	3.17519	2.96004	2.70186	2.0253				16870	3.19209	3.17779
16890	3.19542	2.75002	2.7756	2.27044		16890	3.17808	2.96422	2.69837	2.03288				16880	3.17927	3.17519
16900	3.19581	2.7355	2.78474	2.27786		16900	3.16556	2.94853	2.68672	2.03205				16890	3.19542	3.17808
16910	3.19	2.72633	2.78378	2.27375		16910	3.17373	2.95562	2.69962	2.03014				16900	3.19581	3.16556
16920	3.18728	2.72851	2.78198	2.26569		16920	3.17376	2.9581	2.70133	2.02435				16910	3.19	3.17373
16930	3.18788	2.72816	2.78175	2.26808		16930	3.16889	2.95187	2.69334	2.02882				16920	3.18728	3.17376
16940	3.19095	2.72673	2.77837	2.28253		16940	3.16559	2.95041	2.69073	2.0241				16930	3.18788	3.16889
16950	3.1902	2.72641	2.78343	2.27462		16950	3.16532	2.94892	2.6913	2.02467				16940	3.19095	3.16559
16960	3.19277	2.72714	2.79424	2.26771		16960	3.16789	2.94964	2.68741	2.0368				16950	3.1902	3.16532
16970	3.19263	2.73199	2.79429	2.26142		16970	3.16932	2.95166	2.68445	2.0422				16960	3.19277	3.16789
16980	3.20023	2.73847	2.79585	2.27308		16980	3.16939	2.95417	2.68579	2.03703				16970	3.19263	3.16932
16990	3.18946	2.7314	2.78749	2.26155		16990	3.166	2.94898	2.6775	2.04492				16980	3.20023	3.16939
17000	3.19346	2.74139	2.79006	2.25761		17000	3.16381	2.94618	2.68396	2.03364				16990	3.18946	3.166
17010	3.20008	2.75434	2.78642	2.26507		17010	3.16784	2.95182	2.69125	2.02837				17000	3.19346	3.16381
17020	3.18492	2.74153	2.77217	2.25533		17020	3.17224	2.95777	2.68822	2.03745				17010	3.20008	3.16784
17030	3.19767	2.75541	2.77927	2.26574		17030	3.17155	2.95478	2.6938	2.03228				17020	3.18492	3.17224
17040	3.19117	2.74713	2.76944	2.26949		17040	3.16175	2.94628	2.67609	2.03746				17030	3.19767	3.17155
17050	3.1881	2.74442	2.77254	2.26035		17050	3.17009	2.95713	2.67858	2.04439				17040	3.19117	3.16175
17060	3.17575	2.72156	2.76462	2.26291		17060	3.16853	2.9524	2.6837	2.03968				17050	3.1881	3.17009
17070	3.18876	2.72917	2.78255	2.26836		17070	3.16066	2.94227	2.67639	2.03948				17060	3.17575	3.16853
17080	3.19134	2.73082	2.7938	2.25977		17080	3.16918	2.95371	2.67933	2.04554				17070	3.18876	3.16066
17090	3.18603	2.72473	2.78831	2.25891		17090	3.17091	2.95583	2.67983	2.04717				17080	3.19134	3.16918
17100	3.18829	2.73675	2.78026	2.26069		17100	3.16738	2.94585	2.67349	2.05888				17090	3.18603	3.17091
17110	3.19846	2.74261	2.79725	2.26135		17110	3.16746	2.94907	2.67121	2.05747				17100	3.18829	3.16738
17120	3.19298	2.73091	2.79461	2.2633		17120	3.16236	2.93967	2.66361	2.06509				17110	3.19846	3.16746
17130	3.19213	2.73011	2.79872	2.25679		17130	3.17513	2.95521	2.68226	2.05793				17120	3.19298	3.16236
17140	3.1931	2.73044	2.80231	2.25468		17140	3.17081	2.95162	2.67276	2.06212				17130	3.19213	3.17513
17150	3.19464	2.72279	2.80953	2.25929		17150	3.16981	2.95056	2.67161	2.06205				17140	3.1931	3.17081
17160	3.19938	2.72965	2.80979	2.2641		17160	3.16114	2.93996	2.66904	2.05391				17150	3.19464	3.16981
17170	3.1923	2.7137	2.81766	2.25347		17170	3.16276	2.9422	2.6667	2.05869				17160	3.19938	3.16114
17180	3.19824	2.72039	2.82012	2.25918		17180	3.16241	2.94398	2.67017	2.05059				17170	3.1923	3.16276
17190	3.17533	2.70341	2.78857	2.25408		17190	3.16081	2.94332	2.66808	2.0493				17180	3.19824	3.16241
17200	3.18161	2.7041	2.80251	2.2537		17200	3.16371	2.94443	2.66681	2.0583				17190	3.17533	3.16081
17210	3.18423	2.70296	2.79913	2.26661		17210	3.16533	2.94686	2.66485	2.06234				17200	3.18161	3.16371
17220	3.17545	2.7083	2.78477	2.25326		17220	3.17598	2.95682	2.67354	2.06956				17210	3.18423	3.16533
17230	3.18035	2.72097	2.79446	2.23976		17230	3.17115	2.95414	2.66769	2.06613				17220	3.17545	3.17598
17240	3.17783	2.72042	2.78835	2.24089		17240	3.16853	2.95108	2.67094	2.05825				17230	3.18035	3.17115
17250	3.17749	2.72695	2.78481	2.23639		17250	3.16684	2.9471	2.6724	2.05685				17240	3.17783	3.16853
17260	3.16903	2.71015	2.78541	2.23206		17260	3.16261	2.9447	2.67016	2.05018				17250	3.17749	3.16684
17270	3.18168	2.7244	2.79549	2.23808		17270	3.16941	2.95293	2.68479	2.0402				17260	3.16903	3.16261
17280	3.17814	2.71956	2.78968	2.24116		17280	3.16967	2.95519	2.67552	2.04989				17270	3.18168	3.16941
17290	3.16994	2.71071	2.78656	2.23255		17290	3.16841	2.9522	2.67537	2.05052				17280	3.17814	3.16967
17300	3.17758	2.71473	2.79125	2.24349		17300	3.17081	2.95719	2.68391	2.03953				17290	3.16994	3.16841
17310	3.17446	2.71306	2.79012	2.23805		17310	3.17689	2.96256	2.69423	2.03707				17300	3.17758	3.17081
17320	3.17086	2.7077	2.78931	2.23535		17320	3.18332	2.96966	2.70063	2.03833				17310	3.17446	3.17689
17330	3.18188	2.71077	2.80432	2.24416		17330	3.16774	2.95246	2.68577	2.03441				17320	3.17086	3.18332
17340	3.19047	2.70794	2.81593	2.25739		17340	3.16527	2.95058	2.68453	2.03106				17330	3.18188	3.16774
17350	3.19185	2.7104	2.8149	2.25964		17350	3.16326	2.94611	2.68322	2.03301				17340	3.19047	3.16527
17360	3.18513	2.7021	2.81181	2.25444		17360	3.16451	2.9445	2.68697	2.0343				17350	3.19185	3.16326
17370	3.18624	2.69131	2.82059	2.25951		17370	3.16643	2.94683	2.68658	2.03741				17360	3.18513	3.16451
17380	3.19737	2.692	2.84208	2.26319		17380	3.16367	2.94623	2.68465	2.03226				17370	3.18624	3.16643
17390	3.19481	2.68284	2.83225	2.2791		17390	3.16194	2.9481	2.68057	2.02954				17380	3.19737	3.16367
17400	3.19679	2.68238	2.83252	2.28486		17400	3.16147	2.94548	2.68137	2.03082				17390	3.19481	3.16194
17410	3.19726	2.68255	2.83497	2.28294		17410	3.16458	2.9493	2.67474	2.04365				17400	3.19679	3.16147
17420	3.19523	2.66993	2.83975	2.2861		17420	3.16646	2.9513	2.67867	2.04145				17410	3.19726	3.16458
17430	3.19099	2.66902	2.83237	2.28448		17430	3.15211	2.93251	2.66959	2.03601				17420	3.19523	3.16646
17440	3.19463	2.66837	2.84143	2.28415		17440	3.15257	2.93343	2.6692	2.03659				17430	3.19099	3.15211
17450	3.19769	2.67464	2.83834	2.28923		17450	3.15722	2.93769	2.67674	2.03498				17440	3.19463	3.15257
17460	3.19567	2.69602	2.83783	2.25894		17460	3.16371	2.94559	2.67834	2.04159				17450	3.19769	3.15722
17470	3.19128	2.697	2.83162	2.25314		17470	3.16954	2.95262	2.68767	2.03727				17460	3.19567	3.16371
17480	3.19249	2.6943	2.83371	2.25718		17480	3.16416	2.94557	2.69163	2.02547				17470	3.19128	3.16954
17490	3.19784	2.70404	2.82962	2.26577		17490	3.15424	2.93672	2.67428	2.03037				17480	3.19249	3.16416
17500	3.19763	2.70588	2.82154	2.27304		17500	3.16737	2.95088	2.69083	2.02885				17490	3.19784	3.15424
17510	3.20248	2.71279	2.82117	2.27894		17510	3.17163	2.95655	2.69739	2.0252				17500	3.19763	3.16737
17520	3.19711	2.70364	2.8193	2.27704		17520	3.16457	2.95045	2.68837	2.02398				17510	3.20248	3.17163
17530	3.19214	2.70104	2.82091	2.26415		17530	3.16996	2.95482	2.69753	2.02229				17520	3.19711	3.16457
17540	3.20107	2.71731	2.8331	2.25464		17540	3.15627	2.94097	2.68135	2.02116				17530	3.19214	3.16996
17550	3.19744	2.71131	2.82376	2.26329		17550	3.15865	2.94265	2.67774	2.03093				17540	3.20107	3.15627
17560	3.19616	2.71499	2.81432	2.26702		17560	3.16432	2.94729	2.6883	2.02789				17550	3.19744	3.15865
17570	3.19983	2.72101	2.81186	2.27317		17570	3.164	2.94687	2.67937	2.03928				17560	3.19616	3.16432
17580	3.19838	2.72839	2.80422	2.26969		17580	3.1701	2.95275	2.68925	2.03671				17570	3.19983	3.164
17590	3.2	2.73503	2.79674	2.27549		17590	3.15892	2.93999	2.68083	2.03155				17580	3.19838	3.1701
17600	3.19686	2.7442	2.79315	2.25996		17600	3.16637	2.94959	2.67855	2.04379				17590	3.2	3.15892
17610	3.19702	2.74366	2.79076	2.26402		17610	3.16847	2.94739	2.67315	2.06048				17600	3.19686	3.16637
17620	3.19536	2.75381	2.78605	2.2528		17620	3.16989	2.94924	2.68078	2.05227				17610	3.19702	3.16847
17630	3.18505	2.75465	2.77692	2.23375		17630	3.167	2.94722	2.67502	2.05377				17620	3.19536	3.16989
17640	3.18946	2.76394	2.77839	2.23305		17640	3.16515	2.946	2.67365	2.05159				17630	3.18505	3.167
17650	3.19146	2.7842	2.78192	2.20907		17650	3.169	2.94852	2.67998	2.05159				17640	3.18946	3.16515
17660	3.19302	2.7886	2.78161	2.20844		17660	3.16557	2.94671	2.67602	2.04878				17650	3.19146	3.169
17670	3.186	2.76917	2.77744	2.21782		17670	3.17371	2.95654	2.67922	2.0556				17660	3.19302	3.16557
17680	3.1843	2.78315	2.7685	2.20659		17680	3.16911	2.95145	2.6786	2.04952				17670	3.186	3.17371
17690	3.19604	2.79207	2.78184	2.21249		17690	3.17553	2.95615	2.68806	2.05024				17680	3.1843	3.16911
17700	3.19765	2.792	2.78528	2.21291		17700	3.16955	2.95021	2.68916	2.03882				17690	3.19604	3.17553
17710	3.18568	2.78168	2.7729	2.2069		17710	3.17157	2.95497	2.6936	2.03234				17700	3.19765	3.16955
17720	3.18246	2.78302	2.77017	2.19935		17720	3.17584	2.95855	2.69527	2.03823				17710	3.18568	3.17157
17730	3.19044	2.79154	2.77873	2.20086		17730	3.16362	2.94704	2.67948	2.03773				17720	3.18246	3.17584
17740	3.18989	2.79196	2.77408	2.2046		17740	3.16511	2.94513	2.68719	2.03498				17730	3.19044	3.16362
17750	3.19421	2.79916	2.77595	2.20564		17750	3.16516	2.94673	2.6856	2.03489				17740	3.18989	3.16511
17760	3.18061	2.77691	2.7658	2.20718		17760	3.1694	2.95193	2.68773	2.03776				17750	3.19421	3.16516
17770	3.18307	2.773	2.77773	2.20422		17770	3.16413	2.94295	2.68279	2.04087				17760	3.18061	3.1694
17780	3.18322	2.77848	2.76849	2.20936		17780	3.1741	2.95452	2.69406	2.04027				17770	3.18307	3.16413
17790	3.18115	2.76303	2.77417	2.21564		17790	3.17962	2.9613	2.70523	2.03283				17780	3.18322	3.1741
17800	3.18863	2.77091	2.78409	2.21486		17800	3.17455	2.95389	2.69976	2.03505				17790	3.18115	3.17962
17810	3.19344	2.77357	2.78896	2.21926		17810	3.1769	2.95862	2.69726	2.03881				17800	3.18863	3.17455
17820	3.19014	2.77483	2.78594	2.21197		17820	3.17643	2.95788	2.69317	2.04382				17810	3.19344	3.1769
17830	3.18657	2.7611	2.7838	2.22154		17830	3.18102	2.96344	2.69357	2.04949				17820	3.19014	3.17643
17840	3.19716	2.77288	2.80026	2.21661		17840	3.1811	2.96321	2.70123	2.03999				17830	3.18657	3.18102
17850	3.19151	2.76974	2.79807	2.20699		17850	3.17544	2.95704	2.69677	2.03719				17840	3.19716	3.1811
17860	3.19673	2.77647	2.79973	2.21156		17860	3.18086	2.95926	2.6992	2.04764				17850	3.19151	3.17544
17870	3.18223	2.76013	2.78973	2.20281		17870	3.18325	2.96359	2.70201	2.0451				17860	3.19673	3.18086
17880	3.18385	2.76432	2.79665	2.19344		17880	3.17349	2.95212	2.68441	2.05452				17870	3.18223	3.18325
17890	3.18028	2.7717	2.78529	2.18819		17890	3.17548	2.95554	2.68971	2.04882				17880	3.18385	3.17349
17900	3.1901	2.78056	2.79051	2.19887		17900	3.17884	2.96066	2.68803	2.05402				17890	3.18028	3.17548
17910	3.19185	2.79099	2.7866	2.19568		17910	3.18156	2.96455	2.69383	2.04923				17900	3.1901	3.17884
17920	3.18977	2.78656	2.78232	2.20069		17920	3.17571	2.95705	2.6876	2.05009				17910	3.19185	3.18156
17930	3.19574	2.79239	2.78939	2.20167		17930	3.17004	2.95123	2.69228	2.03474				17920	3.18977	3.17571
17940	3.19622	2.7897	2.78705	2.20942		17940	3.17291	2.9547	2.69023	2.04134				17930	3.19574	3.17004
17950	3.19294	2.78491	2.77849	2.21677		17950	3.17554	2.95747	2.6982	2.035				17940	3.19622	3.17291
17960	3.18013	2.77872	2.7585	2.21266		17960	3.1808	2.96432	2.70128	2.03736				17950	3.19294	3.17554
17970	3.18911	2.78839	2.7697	2.21234		17970	3.17839	2.96231	2.70127	2.03278				17960	3.18013	3.1808
17980	3.18251	2.77645	2.76674	2.21205		17980	3.18013	2.96339	2.70058	2.03756				17970	3.18911	3.17839
17990	3.18628	2.78717	2.77801	2.19526		17990	3.16685	2.95002	2.68676	2.03386				17980	3.18251	3.18013
18000	3.18194	2.78559	2.76217	2.20463		18000	3.17602	2.96047	2.69632	2.03461				17990	3.18628	3.16685
18010	3.18351	2.7899	2.76455	2.20072		18010	3.17425	2.95093	2.69195	2.0487				18000	3.18194	3.17602
18020	3.19312	2.80152	2.7773	2.19774		18020	3.1777	2.95521	2.69719	2.04632				18010	3.18351	3.17425
18030	3.19361	2.80133	2.77594	2.20113		18030	3.1687	2.94833	2.68323	2.04669				18020	3.19312	3.1777
18040	3.19175	2.80268	2.77319	2.1975		18040	3.17815	2.95775	2.69513	2.04678				18030	3.19361	3.1687
18050	3.19276	2.80143	2.76808	2.20843		18050	3.17709	2.95806	2.69217	2.04691				18040	3.19175	3.17815
18060	3.18937	2.79459	2.77277	2.2014		18060	3.18053	2.96153	2.70086	2.04115				18050	3.19276	3.17709
18070	3.19117	2.79918	2.77034	2.20384		18070	3.16922	2.94906	2.68743	2.04175				18060	3.18937	3.18053
18080	3.20209	2.80976	2.77678	2.21392		18080	3.15872	2.93827	2.68671	2.02565				18070	3.19117	3.16922
18090	3.18275	2.805	2.74764	2.20051		18090	3.17344	2.95364	2.69589	2.03705				18080	3.20209	3.15872
18100	3.18894	2.80964	2.75692	2.20092		18100	3.16873	2.94866	2.69562	2.02995				18090	3.18275	3.17344
18110	3.19824	2.8181	2.76404	2.20813		18110	3.16915	2.95014	2.69698	2.02731				18100	3.18894	3.16873
18120	3.19146	2.80515	2.75498	2.21632		18120	3.16471	2.94393	2.69351	2.0271				18110	3.19824	3.16915
18130	3.2001	2.81476	2.76895	2.21165		18130	3.1614	2.94018	2.68501	2.03347				18120	3.19146	3.16471
18140	3.19773	2.81564	2.7713	2.20069		18140	3.16759	2.94893	2.69588	2.02566				18130	3.2001	3.1614
18150	3.19163	2.80991	2.77073	2.19099		18150	3.17167	2.95224	2.69906	2.02936				18140	3.19773	3.16759
18160	3.2007	2.82713	2.77988	2.1837		18160	3.16929	2.95122	2.69003	2.0354				18150	3.19163	3.17167
18170	3.19869	2.82036	2.77534	2.19234		18170	3.15602	2.93431	2.67596	2.03716				18160	3.2007	3.16929
18180	3.1964	2.81744	2.77228	2.19328		18180	3.16542	2.94602	2.68344	2.03959				18170	3.19869	3.15602
18190	3.2015	2.81985	2.77915	2.19635		18190	3.17381	2.95412	2.69431	2.03962				18180	3.1964	3.16542
18200	3.207	2.82357	2.77657	2.21084		18200	3.16959	2.94946	2.68847	2.04094				18190	3.2015	3.17381
18210	3.2046	2.81957	2.7627	2.2263		18210	3.17822	2.95812	2.70694	2.03079				18200	3.207	3.16959
18220	3.20389	2.82623	2.76581	2.2119		18220	3.16829	2.94878	2.69675	2.02691				18210	3.2046	3.17822
18230	3.20025	2.82219	2.7636	2.20929		18230	3.17027	2.95081	2.69518	2.03223				18220	3.20389	3.16829
18240	3.1995	2.8279	2.76895	2.19305		18240	3.1668	2.94678	2.68491	2.04082				18230	3.20025	3.17027
18250	3.19984	2.82567	2.77141	2.19382		18250	3.17397	2.95787	2.68739	2.04379				18240	3.1995	3.1668
18260	3.20691	2.83097	2.77705	2.2005		18260	3.18	2.962	2.68859	2.05495				18250	3.19984	3.17397
18270	3.20557	2.83159	2.78006	2.19197		18270	3.17486	2.95572	2.68654	2.0508				18260	3.20691	3.18
18280	3.20201	2.82792	2.77432	2.19357		18280	3.16168	2.94176	2.674	2.04651				18270	3.20557	3.17486
18290	3.2067	2.83693	2.77142	2.19928		18290	3.16912	2.9505	2.6754	2.0551				18280	3.20201	3.16168
18300	3.19348	2.82784	2.76049	2.18624		18300	3.17742	2.95701	2.69916	2.04027				18290	3.2067	3.16912
18310	3.20295	2.83394	2.76962	2.1945		18310	3.16816	2.94982	2.68361	2.04238				18300	3.19348	3.17742
18320	3.19819	2.83269	2.76845	2.18365		18320	3.18183	2.96385	2.69752	2.04623				18310	3.20295	3.16816
18330	3.19722	2.83116	2.76745	2.18408		18330	3.17997	2.9571	2.68889	2.06151				18320	3.19819	3.18183
18340	3.18152	2.81663	2.75362	2.17448		18340	3.17733	2.95591	2.68403	2.06142				18330	3.19722	3.17997
18350	3.19928	2.83115	2.77299	2.18311		18350	3.17958	2.95784	2.69126	2.05616				18340	3.18152	3.17733
18360	3.19544	2.82961	2.76508	2.18386		18360	3.17678	2.95574	2.68923	2.05316				18350	3.19928	3.17958
18370	3.19159	2.82531	2.76502	2.17824		18370	3.17913	2.96062	2.68542	2.05839				18360	3.19544	3.17678
18380	3.20551	2.83147	2.78591	2.18453		18380	3.18034	2.96071	2.69497	2.0495				18370	3.19159	3.17913
18390	3.19414	2.81465	2.77589	2.18567		18390	3.18237	2.96018	2.69763	2.05306				18380	3.20551	3.18034
18400	3.18531	2.80015	2.77058	2.18529		18400	3.17504	2.94771	2.68555	2.06413				18390	3.19414	3.18237
18410	3.1894	2.79975	2.77244	2.19533		18410	3.17991	2.95668	2.68671	2.06478				18400	3.18531	3.17504
18420	3.17708	2.78713	2.7592	2.19234		18420	3.18168	2.95768	2.68982	2.06474				18410	3.1894	3.17991
18430	3.18079	2.79896	2.75734	2.19038		18430	3.17333	2.94671	2.69369	2.04965				18420	3.17708	3.18168
18440	3.19031	2.80286	2.77082	2.19606		18440	3.16833	2.94163	2.68239	2.05627				18430	3.18079	3.17333
18450	3.18435	2.79969	2.75692	2.20028		18450	3.16996	2.94439	2.68131	2.05876				18440	3.19031	3.16833
18460	3.18199	2.80117	2.75331	2.1961		18460	3.1629	2.93888	2.67604	2.05172				18450	3.18435	3.16996
18470	3.17745	2.78294	2.76314	2.19379		18470	3.16533	2.94267	2.67088	2.06052				18460	3.18199	3.1629
18480	3.17704	2.77711	2.77081	2.1903		18480	3.16481	2.93738	2.66688	2.07163				18470	3.17745	3.16533
18490	3.18483	2.77569	2.78493	2.19682		18490	3.17199	2.94437	2.67092	2.07845				18480	3.17704	3.16481
18500	3.1805	2.76831	2.78512	2.19335		18500	3.16772	2.9376	2.67118	2.07464				18490	3.18483	3.17199
18510	3.17979	2.77304	2.78267	2.18841		18510	3.17035	2.93954	2.67828	2.07079				18500	3.1805	3.16772
18520	3.18441	2.77839	2.78899	2.18703		18520	3.16692	2.9328	2.66956	2.08107				18510	3.17979	3.17035
18530	3.1875	2.78844	2.78728	2.18539		18530	3.17105	2.93893	2.67209	2.08176				18520	3.18441	3.16692
18540	3.18013	2.78214	2.78408	2.17601		18540	3.1689	2.93285	2.66949	2.08712				18530	3.1875	3.17105
18550	3.18248	2.78663	2.78765	2.17257		18550	3.16398	2.92729	2.66318	2.08806				18540	3.18013	3.1689
18560	3.18091	2.78476	2.78933	2.1682		18560	3.1593	2.92227	2.65997	2.08502				18550	3.18248	3.16398
18570	3.17532	2.77721	2.78541	2.16654		18570	3.1506	2.91336	2.64514	2.09001				18560	3.18091	3.1593
18580	3.17096	2.77172	2.7818	2.16544		18580	3.16324	2.92784	2.66104	2.08778				18570	3.17532	3.1506
18590	3.17714	2.7748	2.78498	2.1755		18590	3.16465	2.9303	2.66309	2.08598				18580	3.17096	3.16324
18600	3.17385	2.78053	2.77706	2.16869		18600	3.16741	2.9341	2.66415	2.08766				18590	3.17714	3.16465
18610	3.1782	2.78687	2.77644	2.17409		18610	3.16693	2.9323	2.65848	2.09596				18600	3.17385	3.16741
18620	3.18338	2.79683	2.78324	2.16773		18620	3.17296	2.93919	2.66961	2.09039				18610	3.1782	3.16693
18630	3.17691	2.78991	2.77998	2.16185		18630	3.16356	2.93146	2.66606	2.07723				18620	3.18338	3.17296
18640	3.17699	2.7946	2.78123	2.15442		18640	3.16261	2.93329	2.66703	2.07052				18630	3.17691	3.16356
18650	3.16792	2.78498	2.77222	2.15179		18650	3.18097	2.95513	2.68449	2.07312				18640	3.17699	3.16261
18660	3.17358	2.78601	2.78546	2.15		18660	3.17383	2.94254	2.67649	2.07949				18650	3.16792	3.18097
18670	3.17319	2.79104	2.78407	2.14415		18670	3.16564	2.93143	2.66669	2.0828				18660	3.17358	3.17383
18680	3.17933	2.7957	2.79617	2.14052		18680	3.17179	2.93876	2.67632	2.07883				18670	3.17319	3.16564
18690	3.18689	2.80809	2.80146	2.13987		18690	3.17453	2.94033	2.68355	2.07564				18680	3.17933	3.17179
18700	3.17414	2.7881	2.78572	2.14864		18700	3.17352	2.94021	2.67341	2.08578				18690	3.18689	3.17453
18710	3.18041	2.80696	2.78323	2.14585		18710	3.18114	2.95008	2.67516	2.0928				18700	3.17414	3.17352
18720	3.18712	2.80463	2.79346	2.15547		18720	3.18452	2.9558	2.6793	2.08973				18710	3.18041	3.18114
18730	3.18189	2.79638	2.7895	2.15587		18730	3.18403	2.95647	2.67865	2.08811				18720	3.18712	3.18452
18740	3.17369	2.78352	2.78848	2.14967		18740	3.17708	2.94807	2.66222	2.09979				18730	3.18189	3.18403
18750	3.18001	2.78453	2.79258	2.16168		18750	3.17515	2.94553	2.66874	2.0892				18740	3.17369	3.17708
18760	3.17927	2.78578	2.78599	2.16639		18760	3.16649	2.9334	2.66711	2.08206				18750	3.18001	3.17515
18770	3.18132	2.79526	2.78391	2.16285		18770	3.1618	2.93112	2.65035	2.0924				18760	3.17927	3.16649
18780	3.17861	2.79042	2.78239	2.16309		18780	3.16431	2.93272	2.65347	2.0938				18770	3.18132	3.1618
18790	3.16964	2.77965	2.78243	2.15054		18790	3.17322	2.94255	2.66839	2.08801				18780	3.17861	3.16431
18800	3.17253	2.7748	2.79162	2.15342		18800	3.17451	2.94568	2.66673	2.08961				18790	3.16964	3.17322
18810	3.17346	2.7762	2.79266	2.15302		18810	3.16659	2.9416	2.66431	2.07436				18800	3.17253	3.17451
18820	3.17812	2.78221	2.78722	2.16603		18820	3.17233	2.94734	2.67441	2.07078				18810	3.17346	3.16659
18830	3.18657	2.79183	2.79622	2.16685		18830	3.17623	2.95387	2.66933	2.07997				18820	3.17812	3.17233
18840	3.18989	2.79071	2.80889	2.16168		18840	3.17581	2.95253	2.67041	2.07919				18830	3.18657	3.17623
18850	3.18572	2.7819	2.80518	2.16556		18850	3.1745	2.94981	2.66986	2.07975				18840	3.18989	3.17581
18860	3.17633	2.77338	2.79841	2.15763		18860	3.18042	2.9558	2.6733	2.08489				18850	3.18572	3.1745
18870	3.17868	2.77004	2.80102	2.16544		18870	3.15937	2.92868	2.65007	2.08883				18860	3.17633	3.18042
18880	3.17945	2.77091	2.80509	2.16132		18880	3.16266	2.93557	2.65243	2.08613				18870	3.17868	3.15937
18890	3.18521	2.77786	2.81154	2.16099		18890	3.16983	2.9434	2.66099	2.08595				18880	3.17945	3.16266
18900	3.18875	2.77694	2.82323	2.15737		18900	3.16899	2.94447	2.65333	2.09163				18890	3.18521	3.16983
18910	3.1943	2.77831	2.83501	2.15659		18910	3.17169	2.94626	2.65924	2.0898				18900	3.18875	3.16899
18920	3.1892	2.77063	2.832	2.1553		18920	3.16392	2.93601	2.64875	2.094				18910	3.1943	3.17169
18930	3.18195	2.76497	2.81612	2.16195		18930	3.15779	2.93129	2.64378	2.08837				18920	3.1892	3.16392
18940	3.18172	2.77071	2.82346	2.14428		18940	3.15829	2.9297	2.63838	2.0989				18930	3.18195	3.15779
18950	3.1735	2.76985	2.81114	2.13721		18950	3.1723	2.94839	2.65492	2.09413				18940	3.18172	3.15829
18960	3.17768	2.77847	2.81369	2.13509		18960	3.16944	2.94639	2.64871	2.09615				18950	3.1735	3.1723
18970	3.17905	2.77617	2.81636	2.13862		18970	3.17358	2.94977	2.65107	2.10093				18960	3.17768	3.16944
18980	3.18284	2.77798	2.81206	2.15317		18980	3.16993	2.9463	2.65155	2.09414				18970	3.17905	3.17358
18990	3.18703	2.78205	2.81596	2.15519		18990	3.16975	2.94353	2.65073	2.09854				18980	3.18284	3.16993
19000	3.19609	2.79003	2.82666	2.1577		19000	3.16637	2.94088	2.64699	2.09678				18990	3.18703	3.16975
19010	3.184	2.76873	2.82124	2.1565		19010	3.16686	2.94293	2.64692	2.09548				19000	3.19609	3.16637
19020	3.18716	2.77179	2.83375	2.14547		19020	3.18095	2.95994	2.66098	2.09639				19010	3.184	3.16686
19030	3.18712	2.77173	2.83512	2.1436		19030	3.17595	2.95918	2.64118	2.10731				19020	3.18716	3.18095
19040	3.17718	2.75223	2.82284	2.15539		19040	3.1672	2.94559	2.64083	2.10043				19030	3.18712	3.17595
19050	3.18958	2.75661	2.84283	2.16014		19050	3.17099	2.94736	2.65091	2.0967				19040	3.17718	3.1672
19060	3.19105	2.7529	2.84821	2.16214		19060	3.1716	2.94758	2.6455	2.10504				19050	3.18958	3.17099
19070	3.19508	2.7628	2.8462	2.16406		19070	3.16516	2.94147	2.64344	2.09677				19060	3.19105	3.1716
19080	3.18698	2.75266	2.83988	2.16141		19080	3.17197	2.95228	2.6463	2.09855				19070	3.19508	3.16516
19090	3.19013	2.75677	2.84985	2.15231		19090	3.17129	2.95168	2.65008	2.09256				19080	3.18698	3.17197
19100	3.18821	2.76372	2.83924	2.15174		19100	3.17555	2.9567	2.6565	2.09025				19090	3.19013	3.17129
19110	3.17896	2.7521	2.82655	2.15594		19110	3.17458	2.95506	2.65363	2.09327				19100	3.18821	3.17555
19120	3.18556	2.75902	2.83287	2.15831		19120	3.16093	2.94142	2.64277	2.08491				19110	3.17896	3.17458
19130	3.1855	2.76527	2.82427	2.16138		19130	3.16795	2.94771	2.65198	2.08562				19120	3.18556	3.16093
19140	3.18053	2.76486	2.82135	2.15106		19140	3.17186	2.95276	2.66174	2.07791				19130	3.1855	3.16795
19150	3.18621	2.77824	2.82717	2.14296		19150	3.16692	2.94713	2.65468	2.0799				19140	3.18053	3.17186
19160	3.18267	2.76741	2.82569	2.14843		19160	3.17048	2.94965	2.65304	2.08921				19150	3.18621	3.16692
19170	3.19488	2.77612	2.83547	2.16049		19170	3.16813	2.94783	2.64586	2.09376				19160	3.18267	3.17048
19180	3.18936	2.76124	2.83331	2.16608		19180	3.16264	2.93768	2.64084	2.09776				19170	3.19488	3.16813
19190	3.18748	2.75176	2.83763	2.16697		19190	3.16738	2.9424	2.6483	2.09603				19180	3.18936	3.16264
19200	3.19805	2.76389	2.84769	2.16945		19200	3.17187	2.9498	2.6524	2.09404				19190	3.18748	3.16738
19210	3.18565	2.74448	2.83593	2.17304		19210	3.16467	2.94173	2.63764	2.10221				19200	3.19805	3.17187
19220	3.19935	2.76194	2.84591	2.17811		19220	3.1754	2.95599	2.64766	2.102				19210	3.18565	3.16467
19230	3.19803	2.75443	2.85175	2.1761		19230	3.17758	2.95727	2.64855	2.10565				19220	3.19935	3.1754
19240	3.1927	2.75808	2.84674	2.16236		19240	3.16415	2.94489	2.62271	2.11487				19230	3.19803	3.17758
19250	3.19458	2.7553	2.8467	2.17147		19250	3.16686	2.94665	2.62481	2.11794				19240	3.1927	3.16415
19260	3.19204	2.75114	2.84491	2.17164		19260	3.16786	2.94418	2.62789	2.12054				19250	3.19458	3.16686
19270	3.19324	2.75112	2.8491	2.1697		19270	3.16468	2.94372	2.62117	2.12				19260	3.19204	3.16786
19280	3.1927	2.75716	2.84282	2.16866		19280	3.15702	2.93493	2.62136	2.10908				19270	3.19324	3.16468
19290	3.18848	2.75923	2.83208	2.16768		19290	3.1627	2.93929	2.63027	2.10895				19280	3.1927	3.15702
19300	3.19029	2.75099	2.84364	2.16833		19300	3.17148	2.94964	2.63342	2.11691				19290	3.18848	3.1627
19310	3.19519	2.7639	2.84648	2.16261		19310	3.16603	2.94426	2.62687	2.11622				19300	3.19029	3.17148
19320	3.19732	2.76583	2.85047	2.16119		19320	3.16696	2.9461	2.61928	2.12581				19310	3.19519	3.16603
19330	3.19086	2.75886	2.84261	2.16135		19330	3.16695	2.9504	2.62835	2.10857				19320	3.19732	3.16696
19340	3.19202	2.76217	2.84495	2.15748		19340	3.16975	2.94947	2.6375	2.10687				19330	3.19086	3.16695
19350	3.19173	2.76237	2.85103	2.14831		19350	3.17262	2.95133	2.64428	2.10439				19340	3.19202	3.16975
19360	3.19122	2.75759	2.84536	2.1604		19360	3.17608	2.95597	2.63998	2.11371				19350	3.19173	3.17262
19370	3.18764	2.7554	2.8359	2.16506		19370	3.16639	2.94921	2.62542	2.11221				19360	3.19122	3.17608
19380	3.17889	2.7438	2.82392	2.16972		19380	3.16816	2.95192	2.62824	2.1102				19370	3.18764	3.16639
19390	3.18232	2.74969	2.82511	2.17078		19390	3.17671	2.96023	2.64085	2.10855				19380	3.17889	3.16816
19400	3.17665	2.74776	2.81662	2.16765		19400	3.18094	2.96133	2.64326	2.11671				19390	3.18232	3.17671
19410	3.18895	2.74734	2.83911	2.17493		19410	3.16492	2.94103	2.62961	2.11399				19400	3.17665	3.18094
19420	3.18651	2.74641	2.83417	2.1754		19420	3.17036	2.94807	2.62941	2.12071				19410	3.18895	3.16492
19430	3.19004	2.75104	2.82857	2.18716		19430	3.17089	2.94641	2.63291	2.12026				19420	3.18651	3.17036
19440	3.19323	2.7539	2.83272	2.1875		19440	3.16871	2.94374	2.63372	2.11646				19430	3.19004	3.17089
19450	3.19126	2.75077	2.8326	2.18586		19450	3.16336	2.93729	2.63044	2.11347				19440	3.19323	3.16871
19460	3.18955	2.76087	2.82544	2.17736		19460	3.16529	2.94203	2.62851	2.11508				19450	3.19126	3.16336
19470	3.19381	2.76116	2.82776	2.18647		19470	3.16718	2.94395	2.62562	2.12163				19460	3.18955	3.16529
19480	3.1907	2.75744	2.82789	2.18191		19480	3.16958	2.94849	2.63459	2.11137				19470	3.19381	3.16718
19490	3.18094	2.74859	2.81803	2.1773		19490	3.16904	2.94683	2.63354	2.11335				19480	3.1907	3.16958
19500	3.18793	2.75503	2.82852	2.17602		19500	3.16957	2.94697	2.63704	2.11038				19490	3.18094	3.16904
19510	3.20146	2.7684	2.84438	2.17812		19510	3.16519	2.94048	2.62549	2.12067				19500	3.18793	3.16957
19520	3.19438	2.75995	2.8381	2.17624		19520	3.16528	2.94075	2.62685	2.11886				19510	3.20146	3.16519
19530	3.187	2.75374	2.83216	2.17018		19530	3.17454	2.95087	2.64164	2.11413				19520	3.19438	3.16528
19540	3.20461	2.76935	2.84865	2.18059		19540	3.17318	2.94685	2.63651	2.12203				19530	3.187	3.17454
19550	3.19079	2.75293	2.83984	2.17231		19550	3.1714	2.94582	2.63648	2.11818				19540	3.20461	3.17318
19560	3.19645	2.76021	2.84084	2.17842		19560	3.17677	2.95312	2.64392	2.11483				19550	3.19079	3.1714
19570	3.19197	2.76035	2.83506	2.1726		19570	3.17206	2.94719	2.64199	2.11135				19560	3.19645	3.17677
19580	3.19087	2.76081	2.83018	2.17516		19580	3.17564	2.9496	2.64259	2.11801				19570	3.19197	3.17206
19590	3.18934	2.76175	2.81892	2.18406		19590	3.18386	2.95652	2.65373	2.1191				19580	3.19087	3.17564
19600	3.19277	2.76692	2.81947	2.18687		19600	3.18536	2.95969	2.64812	2.12622				19590	3.18934	3.18386
19610	3.18679	2.76222	2.82168	2.17246		19610	3.17779	2.95326	2.64538	2.11588				19600	3.19277	3.18536
19620	3.19196	2.77566	2.82995	2.15971		19620	3.1805	2.95798	2.64147	2.12229				19610	3.18679	3.17779
19630	3.19477	2.77086	2.83931	2.16189		19630	3.16909	2.94733	2.63349	2.11288				19620	3.19196	3.1805
19640	3.18465	2.76546	2.82043	2.16367		19640	3.18123	2.96246	2.65015	2.10737				19630	3.19477	3.16909
19650	3.19036	2.76498	2.8295	2.16924		19650	3.17506	2.95375	2.64609	2.10608				19640	3.18465	3.18123
19660	3.18755	2.77433	2.82537	2.15437		19660	3.16826	2.94624	2.63664	2.10796				19650	3.19036	3.17506
19670	3.19355	2.77019	2.83804	2.1608		19670	3.17126	2.95156	2.6443	2.09994				19660	3.18755	3.16826
19680	3.18977	2.76352	2.83099	2.16743		19680	3.1688	2.94724	2.64729	2.0948				19670	3.19355	3.17126
19690	3.19122	2.76752	2.83452	2.16198		19690	3.17587	2.95175	2.65219	2.10367				19680	3.18977	3.1688
19700	3.18246	2.75412	2.83041	2.15863		19700	3.18017	2.95648	2.65178	2.1105				19690	3.19122	3.17587
19710	3.17867	2.755	2.82515	2.15321		19710	3.1767	2.9534	2.63885	2.12056				19700	3.18246	3.18017
19720	3.18546	2.75852	2.83122	2.1608		19720	3.17012	2.94557	2.63573	2.1156				19710	3.17867	3.1767
19730	3.18472	2.75985	2.82725	2.16212		19730	3.17439	2.95012	2.63992	2.11687				19720	3.18546	3.17012
19740	3.17824	2.75453	2.81931	2.16021		19740	3.18724	2.96231	2.65245	2.12279				19730	3.18472	3.17439
19750	3.1883	2.76479	2.83014	2.16258		19750	3.17723	2.95177	2.6381	2.12535				19740	3.17824	3.18724
19760	3.18819	2.76173	2.83143	2.16448		19760	3.18232	2.95731	2.63665	2.13465				19750	3.1883	3.17723
19770	3.17865	2.75914	2.81545	2.16057		19770	3.17987	2.95765	2.63602	2.12764				19760	3.18819	3.18232
19780	3.18064	2.75295	2.8191	2.16954		19780	3.16769	2.94293	2.62393	2.12666				19770	3.17865	3.17987
19790	3.16947	2.74245	2.80661	2.16634		19790	3.17529	2.95201	2.6314	2.12751				19780	3.18064	3.16769
19800	3.18134	2.74472	2.82248	2.17761		19800	3.17688	2.95205	2.63849	2.12344				19790	3.16947	3.17529
19810	3.18462	2.74698	2.82752	2.17782		19810	3.17968	2.95874	2.63868	2.12225				19800	3.18134	3.17688
19820	3.18405	2.74389	2.82746	2.18011		19820	3.17057	2.94907	2.62668	2.12335				19810	3.18462	3.17968
19830	3.1818	2.73554	2.82318	2.18956		19830	3.17251	2.95204	2.634	2.11593				19820	3.18405	3.17057
19840	3.18544	2.7383	2.83037	2.1874		19840	3.17077	2.94713	2.63347	2.1182				19830	3.1818	3.17251
19850	3.18759	2.74787	2.82767	2.18517		19850	3.16234	2.93785	2.63184	2.1079				19840	3.18544	3.17077
19860	3.18762	2.74284	2.83464	2.18255		19860	3.16697	2.93832	2.6448	2.10493				19850	3.18759	3.16234
19870	3.18083	2.73679	2.82597	2.18158		19870	3.17657	2.94936	2.65638	2.10383				19860	3.18762	3.16697
19880	3.19019	2.74518	2.82757	2.19623		19880	3.16533	2.93635	2.64481	2.10273				19870	3.18083	3.17657
19890	3.19535	2.74799	2.83332	2.2003		19890	3.17135	2.94201	2.65346	2.10206				19880	3.19019	3.16533
19900	3.19773	2.74492	2.8276	2.21836		19900	3.17064	2.93848	2.65824	2.09881				19890	3.19535	3.17135
19910	3.20164	2.75183	2.82685	2.222		19910	3.17655	2.94131	2.66421	2.10513				19900	3.19773	3.17064
19920	3.19612	2.75145	2.82244	2.21217		19920	3.17693	2.94231	2.6774	2.08807				19910	3.20164	3.17655
19930	3.18635	2.74112	2.81639	2.20452		19930	3.19301	2.95647	2.69553	2.09381				19920	3.19612	3.17693
19940	3.19349	2.74069	2.82407	2.21584		19940	3.18335	2.95098	2.67825	2.09432				19930	3.18635	3.19301
19950	3.19341	2.72509	2.82553	2.23294		19950	3.17874	2.94524	2.67498	2.09256				19940	3.19349	3.18335
19960	3.1959	2.72885	2.82605	2.2348		19960	3.17191	2.93053	2.66425	2.10613				19950	3.19341	3.17874
19970	3.18702	2.71512	2.82142	2.23201		19970	3.17404	2.93402	2.66893	2.10175				19960	3.1959	3.17191
19980	3.195	2.73169	2.82224	2.23357		19980	3.18022	2.94044	2.67497	2.1038				19970	3.18702	3.17404
19990	3.18985	2.72687	2.818	2.23009		19990	3.18048	2.94621	2.6731	2.09887				19980	3.195	3.18022
[truncated: 8,003 more rows]

## Sheet: rmsf
5	0.201		5	0.4077			Residue no.	Docetaxel	Neohespridin
21	0.1091		21	0.3105			1	0.201	0.4077
42	0.0719		42	0.2316			2	0.1091	0.3105
66	0.0617		66	0.1433			3	0.0719	0.2316
76	0.0622		76	0.1185			4	0.0617	0.1433
96	0.0726		96	0.0989			5	0.0622	0.1185
108	0.1015		108	0.092			6	0.0726	0.0989
127	0.1224		127	0.0979			7	0.1015	0.092
148	0.1314		148	0.1385			8	0.1224	0.0979
162	0.1433		162	0.1627			9	0.1314	0.1385
174	0.1453		174	0.156			10	0.1433	0.1627
196	0.1029		196	0.1099			11	0.1453	0.156
212	0.0984		212	0.0892			12	0.1029	0.1099
222	0.1182		222	0.086			13	0.0984	0.0892
229	0.1084		229	0.1167			14	0.1182	0.086
249	0.1087		249	0.1727			15	0.1084	0.1167
259	0.094		259	0.2101			16	0.1087	0.1727
281	0.0921		281	0.2284			17	0.094	0.2101
301	0.1045		301	0.2662			18	0.0921	0.2284
320	0.1113		320	0.2935			19	0.1045	0.2662
342	0.1288		342	0.3649			20	0.1113	0.2935
356	0.1218		356	0.3166			21	0.1288	0.3649
370	0.1061		370	0.2008			22	0.1218	0.3166
381	0.1028		381	0.1689			23	0.1061	0.2008
392	0.1013		392	0.1517			24	0.1028	0.1689
416	0.1046		416	0.1525			25	0.1013	0.1517
436	0.1122		436	0.1509			26	0.1046	0.1525
453	0.1296		453	0.168			27	0.1122	0.1509
468	0.1739		468	0.2295			28	0.1296	0.168
490	0.2309		490	0.2967			29	0.1739	0.2295
502	0.3013		502	0.4124			30	0.2309	0.2967
517	0.3216		517	0.4675			31	0.3013	0.4124
529	0.2853		529	0.4042			32	0.3216	0.4675
541	0.2306		541	0.3656			33	0.2853	0.4042
555	0.1828		555	0.3251			34	0.2306	0.3656
574	0.1621		574	0.2568			35	0.1828	0.3251
593	0.1492		593	0.2142			36	0.1621	0.2568
605	0.1168		605	0.1318			37	0.1492	0.2142
616	0.0956		616	0.1087			38	0.1168	0.1318
637	0.097		637	0.1183			39	0.0956	0.1087
657	0.0897		657	0.0974			40	0.097	0.1183
673	0.1034		673	0.0975			41	0.0897	0.0974
689	0.1058		689	0.1342			42	0.1034	0.0975
711	0.126		711	0.1389			43	0.1058	0.1342
735	0.1316		735	0.1551			44	0.126	0.1389
752	0.1492		752	0.1759			45	0.1316	0.1551
766	0.1468		766	0.1839			46	0.1492	0.1759
786	0.1392		786	0.186			47	0.1468	0.1839
797	0.1127		797	0.154			48	0.1392	0.186
811	0.1143		811	0.1397			49	0.1127	0.154
832	0.1202		832	0.1508			50	0.1143	0.1397
849	0.107		849	0.1368			51	0.1202	0.1508
866	0.0961		866	0.1166			52	0.107	0.1368
881	0.104		881	0.1247			53	0.0961	0.1166
896	0.1104		896	0.1292			54	0.104	0.1247
910	0.0993		910	0.1106			55	0.1104	0.1292
929	0.0977		929	0.1074			56	0.0993	0.1106
950	0.11		950	0.1192			57	0.0977	0.1074
964	0.1059		964	0.1087			58	0.11	0.1192
983	0.0951		983	0.0979			59	0.1059	0.1087
1002	0.104		1002	0.1169			60	0.0951	0.0979
1024	0.1145		1024	0.1212			61	0.104	0.1169
1036	0.0916		1036	0.0963			62	0.1145	0.1212
1055	0.0939		1055	0.1037			63	0.0916	0.0963
1061	0.0773		1061	0.0746			64	0.0939	0.1037
1071	0.079		1071	0.0727			65	0.0773	0.0746
1087	0.0827		1087	0.08			66	0.079	0.0727
1097	0.1054		1097	0.1148			67	0.0827	0.08
1119	0.1033		1119	0.11			68	0.1054	0.1148
1136	0.1071		1136	0.1245			69	0.1033	0.11
1148	0.125		1148	0.1432			70	0.1071	0.1245
1168	0.1381		1168	0.1495			71	0.125	0.1432
1188	0.1614		1188	0.1648			72	0.1381	0.1495
1210	0.1827		1210	0.1807			73	0.1614	0.1648
1230	0.2221		1230	0.2317			74	0.1827	0.1807
1254	0.2589		1254	0.2609			75	0.2221	0.2317
1273	0.2997		1273	0.3169			76	0.2589	0.2609
1285	0.307		1285	0.3145			77	0.2997	0.3169
1292	0.2649		1292	0.2661			78	0.307	0.3145
1304	0.2166		1304	0.2168			79	0.2649	0.2661
1321	0.2151		1321	0.1694			80	0.2166	0.2168
1345	0.1871		1345	0.1551			81	0.2151	0.1694
1351	0.1474		1351	0.1238			82	0.1871	0.1551
1368	0.1174		1368	0.1138			83	0.1474	0.1238
1387	0.1019		1387	0.0943			84	0.1174	0.1138
1398	0.0953		1398	0.0846			85	0.1019	0.0943
1422	0.0972		1422	0.0953			86	0.0953	0.0846
1439	0.096		1439	0.1013			87	0.0972	0.0953
1463	0.0772		1463	0.0842			88	0.096	0.1013
1482	0.0805		1482	0.0823			89	0.0772	0.0842
1496	0.093		1496	0.0827			90	0.0805	0.0823
1518	0.0771		1518	0.0782			91	0.093	0.0827
1539	0.0617		1539	0.0625			92	0.0771	0.0782
1553	0.0589		1553	0.055			93	0.0617	0.0625
1570	0.0512		1570	0.0508			94	0.0589	0.055
1580	0.0544		1580	0.0624			95	0.0512	0.0508
1592	0.0591		1592	0.0639			96	0.0544	0.0624
1611	0.0531		1611	0.0545			97	0.0591	0.0639
1627	0.0548		1627	0.0586			98	0.0531	0.0545
1648	0.0661		1648	0.0677			99	0.0548	0.0586
1658	0.0654		1658	0.0651			100	0.0661	0.0677
1677	0.0634		1677	0.0622			101	0.0654	0.0651
1701	0.0699		1701	0.07			102	0.0634	0.0622
1718	0.0746		1718	0.0721			103	0.0699	0.07
1738	0.0823		1738	0.0801			104	0.0746	0.0721
1750	0.0989		1750	0.0919			105	0.0823	0.0801
1765	0.1224		1765	0.1213			106	0.0989	0.0919
1772	0.1116		1772	0.1124			107	0.1224	0.1213
1786	0.1059		1786	0.0982			108	0.1116	0.1124
1797	0.1165		1797	0.1006			109	0.1059	0.0982
1809	0.1029		1809	0.0853			110	0.1165	0.1006
1823	0.0952		1823	0.0825			111	0.1029	0.0853
1842	0.1017		1842	0.0925			112	0.0952	0.0825
1864	0.1056		1864	0.0921			113	0.1017	0.0925
1879	0.1014		1879	0.0847			114	0.1056	0.0921
1898	0.1002		1898	0.0911			115	0.1014	0.0847
1917	0.1126		1917	0.1045			116	0.1002	0.0911
1933	0.1247		1933	0.1053			117	0.1126	0.1045
1947	0.1352		1947	0.0992			118	0.1247	0.1053
1968	0.1374		1968	0.1042			119	0.1352	0.0992
1982	0.1228		1982	0.1013			120	0.1374	0.1042
1993	0.1459		1993	0.1147			121	0.1228	0.1013
2004	0.2055		2004	0.1836			122	0.1459	0.1147
2016	0.222		2016	0.2377			123	0.2055	0.1836
2028	0.179		2028	0.1805			124	0.222	0.2377
2040	0.1424		2040	0.132			125	0.179	0.1805
2061	0.1213		2061	0.1194			126	0.1424	0.132
2081	0.1447		2081	0.1439			127	0.1213	0.1194
2095	0.145		2095	0.1424			128	0.1447	0.1439
2117	0.1469		2117	0.1509			129	0.145	0.1424
2139	0.1254		2139	0.1359			130	0.1469	0.1509
2151	0.1104		2151	0.1107			131	0.1254	0.1359
2175	0.1025		2175	0.1035			132	0.1104	0.1107
2196	0.1109		2196	0.1148			133	0.1025	0.1035
2208	0.1272		2208	0.136			134	0.1109	0.1148
2228	0.1816		2228	0.1888			135	0.1272	0.136
2244	0.2069		2244	0.1994			136	0.1816	0.1888
2259	0.2511		2259	0.1538			137	0.2069	0.1994
2281	0.1712		2281	0.1777			138	0.2511	0.1538
2287	0.1577		2287	0.1376			139	0.1712	0.1777
2299	0.1279		2299	0.1224			140	0.1577	0.1376
2318	0.1253		2318	0.1302			141	0.1279	0.1224
2337	0.1348		2337	0.1273			142	0.1253	0.1302
2361	0.1164		2361	0.1073			143	0.1348	0.1273
2377	0.0873		2377	0.0813			144	0.1164	0.1073
2398	0.1016		2398	0.0911			145	0.0873	0.0813
2408	0.1165		2408	0.1008			146	0.1016	0.0911
2422	0.0885		2422	0.075			147	0.1165	0.1008
2441	0.0875		2441	0.0772			148	0.0885	0.075
2448	0.0805		2448	0.0742			149	0.0875	0.0772
2463	0.0811		2463	0.0726			150	0.0805	0.0742
2487	0.0702		2487	0.0649			151	0.0811	0.0726
2503	0.0667		2503	0.0657			152	0.0702	0.0649
2527	0.0834		2527	0.072			153	0.0667	0.0657
2544	0.0827		2544	0.0662			154	0.0834	0.072
2554	0.0774		2554	0.0685			155	0.0827	0.0662
2573	0.0839		2573	0.0753			156	0.0774	0.0685
2592	0.0736		2592	0.0706			157	0.0839	0.0753
2614	0.0772		2614	0.0662			158	0.0736	0.0706
2628	0.0766		2628	0.0707			159	0.0772	0.0662
2644	0.0782		2644	0.0767			160	0.0766	0.0707
2661	0.0722		2661	0.0701			161	0.0782	0.0767
2681	0.0722		2681	0.0707			162	0.0722	0.0701
2692	0.0801		2692	0.0789			163	0.0722	0.0707
2704	0.0838		2704	0.0836			164	0.0801	0.0789
2714	0.0832		2714	0.0849			165	0.0838	0.0836
2731	0.0914		2731	0.0883			166	0.0832	0.0849
2755	0.1027		2755	0.1002			167	0.0914	0.0883
2769	0.1018		2769	0.1036			168	0.1027	0.1002
2779	0.1004		2779	0.1035			169	0.1018	0.1036
2786	0.0875		2786	0.0915			170	0.1004	0.1035
2805	0.0842		2805	0.0912			171	0.0875	0.0915
2821	0.0838		2821	0.0962			172	0.0842	0.0912
2828	0.0673		2828	0.0828			173	0.0838	0.0962
2844	0.0595		2844	0.062			174	0.0673	0.0828
2863	0.0595		2863	0.0526			175	0.0595	0.062
2877	0.061		2877	0.0489			176	0.0595	0.0526
2896	0.0563		2896	0.0557			177	0.061	0.0489
2908	0.0608		2908	0.056			178	0.0563	0.0557
2922	0.0648		2922	0.0548			179	0.0608	0.056
2939	0.0654		2939	0.0621			180	0.0648	0.0548
2951	0.0766		2951	0.0675			181	0.0654	0.0621
2970	0.0829		2970	0.0664			182	0.0766	0.0675
2984	0.0682		2984	0.0616			183	0.0829	0.0664
2991	0.0678		2991	0.0637			184	0.0682	0.0616
3005	0.0686		3005	0.0578			185	0.0678	0.0637
3029	0.0812		3029	0.067			186	0.0686	0.0578
3050	0.078		3050	0.0802			187	0.0812	0.067
3062	0.0854		3062	0.1064			188	0.078	0.0802
3082	0.0957		3082	0.1786			189	0.0854	0.1064
3089	0.0916		3089	0.1685			190	0.0957	0.1786
3101	0.0863		3101	0.1088			191	0.0916	0.1685
3121	0.0997		3121	0.1143			192	0.0863	0.1088
3140	0.1111		3140	0.1209			193	0.0997	0.1143
3157	0.1222		3157	0.1248			194	0.1111	0.1209
3171	0.1392		3171	0.1422			195	0.1222	0.1248
3193	0.1264		3193	0.1277			196	0.1392	0.1422
3199	0.1266		3199	0.1211			197	0.1264	0.1277
3206	0.1289		3206	0.1227			198	0.1266	0.1211
3217	0.0966		3217	0.0967			199	0.1289	0.1227
3224	0.0981		3224	0.0923			200	0.0966	0.0967
3248	0.0703		3248	0.076			201	0.0981	0.0923
3254	0.0654		3254	0.0763			202	0.0703	0.076
3270	0.0611		3270	0.0711			203	0.0654	0.0763
3286	0.0621		3286	0.1045			204	0.0611	0.0711
3298	0.0627		3298	0.0735			205	0.0621	0.1045
3309	0.0518		3309	0.0483			206	0.0627	0.0735
3330	0.0523		3330	0.0485			207	0.0518	0.0483
3351	0.049		3351	0.0505			208	0.0523	0.0485
3362	0.0488		3362	0.0516			209	0.049	0.0505
3381	0.0493		3381	0.053			210	0.0488	0.0516
3400	0.0498		3400	0.0518			211	0.0493	0.053
3425	0.0546		3425	0.0597			212	0.0498	0.0518
3431	0.0562		3431	0.0594			213	0.0546	0.0597
3450	0.0531		3450	0.053			214	0.0562	0.0594
3469	0.0586		3469	0.0559			215	0.0531	0.053
3483	0.0711		3483	0.0665			216	0.0586	0.0559
3502	0.0711		3502	0.0705			217	0.0711	0.0665
3516	0.0735		3516	0.0668			218	0.0711	0.0705
3540	0.0683		3540	0.0633			219	0.0735	0.0668
3550	0.072		3550	0.0659			220	0.0683	0.0633
3569	0.0954		3569	0.0847			221	0.072	0.0659
3583	0.0884		3583	0.083			222	0.0954	0.0847
3593	0.0823		3593	0.076			223	0.0884	0.083
3608	0.0998		3608	0.0952			224	0.0823	0.076
3619	0.1054		3619	0.1136			225	0.0998	0.0952
3636	0.1242		3636	0.1324			226	0.1054	0.1136
3652	0.134		3652	0.1378			227	0.1242	0.1324
3664	0.112		3664	0.1179			228	0.134	0.1378
3678	0.1371		3678	0.1432			229	0.112	0.1179
3690	0.1546		3690	0.1558			230	0.1371	0.1432
3709	0.18		3709	0.1832			231	0.1546	0.1558
3723	0.1586		3723	0.1648			232	0.18	0.1832
3753	0.1579		3753	0.1681			233	0.1586	0.1648
3759	0.1309		3759	0.1397			234	0.1579	0.1681
3780	0.1254		3780	0.1316			235	0.1309	0.1397
3799	0.1788		3799	0.171			236	0.1254	0.1316
3821	0.1494		3821	0.1541			237	0.1788	0.171
3845	0.1727		3845	0.1793			238	0.1494	0.1541
3857	0.2036		3857	0.1966			239	0.1727	0.1793
3876	0.1899		3876	0.1809			240	0.2036	0.1966
3895	0.1311		3895	0.1325			241	0.1899	0.1809
3917	0.1062		3917	0.1096			242	0.1311	0.1325
3938	0.0859		3938	0.105			243	0.1062	0.1096
3950	0.0734		3950	0.0831			244	0.0859	0.105
3970	0.0746		3970	0.0828			245	0.0734	0.0831
3984	0.0868		3984	0.0897			246	0.0746	0.0828
3999	0.08		3999	0.0799			247	0.0868	0.0897
4014	0.0652		4014	0.0656			248	0.08	0.0799
4038	0.0707		4038	0.0724			249	0.0652	0.0656
4057	0.0814		4057	0.0779			250	0.0707	0.0724
4079	0.0748		4079	0.071			251	0.0814	0.0779
4098	0.0638		4098	0.0665			252	0.0748	0.071
4118	0.0751		4118	0.0754			253	0.0638	0.0665
4130	0.075		4130	0.0722			254	0.0751	0.0754
4154	0.071		4154	0.0711			255	0.075	0.0722
4175	0.0677		4175	0.0685			256	0.071	0.0711
4195	0.0771		4195	0.0799			257	0.0677	0.0685
4217	0.0643		4217	0.0684			258	0.0771	0.0799
4238	0.0639		4238	0.0692			259	0.0643	0.0684
4262	0.0703		4262	0.1199			260	0.0639	0.0692
4274	0.0767		4274	0.0852			261	0.0703	0.1199
4291	0.0885		4291	0.0852			262	0.0767	0.0852
4305	0.068		4305	0.0679			263	0.0885	0.0852
4326	0.0625		4326	0.0672			264	0.068	0.0679
4351	0.067		4351	0.0651			265	0.0625	0.0672
4357	0.0571		4357	0.0614			266	0.067	0.0651
4371	0.057		4371	0.0612			267	0.0571	0.0614
4382	0.0644		4382	0.0722			268	0.057	0.0612
4398	0.0666		4398	0.0832			269	0.0644	0.0722
4412	0.0689		4412	0.0836			270	0.0666	0.0832
4423	0.09		4423	0.1208			271	0.0689	0.0836
4442	0.0784		4442	0.0967			272	0.09	0.1208
4454	0.0716		4454	0.0886			273	0.0784	0.0967
4466	0.0713		4466	0.0716			274	0.0716	0.0886
4490	0.0603		4490	0.0658			275	0.0713	0.0716
4501	0.0551		4501	0.0611			276	0.0603	0.0658
4520	0.0591		4520	0.0573			277	0.0551	0.0611
4539	0.0556		4539	0.0553			278	0.0591	0.0573
4556	0.0507		4556	0.0521			279	0.0556	0.0553
4567	0.0509		4567	0.0498			280	0.0507	0.0521
4577	0.0509		4577	0.0507			281	0.0509	0.0498
4591	0.0515		4591	0.0517			282	0.0509	0.0507
4611	0.0499		4611	0.0488			283	0.0515	0.0517
4625	0.0521		4625	0.0513			284	0.0499	0.0488
4641	0.0592		4641	0.0562			285	0.0521	0.0513
4660	0.0547		4660	0.0559			286	0.0592	0.0562
4680	0.0677		4680	0.0709			287	0.0547	0.0559
4691	0.0885		4691	0.0816			288	0.0677	0.0709
4705	0.0788		4705	0.0814			289	0.0885	0.0816
4721	0.0917		4721	0.0896			290	0.0788	0.0814
4749	0.1096		4749	0.1056			291	0.0917	0.0896
4763	0.1089		4763	0.1			292	0.1096	0.1056
4769	0.121		4769	0.1097			293	0.1089	0.1
4783	0.0995		4783	0.0908			294	0.121	0.1097
4794	0.0805		4794	0.0689			295	0.0995	0.0908
4814	0.0762		4814	0.0647			296	0.0805	0.0689
4829	0.0746		4829	0.0595			297	0.0762	0.0647
4835	0.0796		4835	0.0623			298	0.0746	0.0595
4854	0.0949		4854	0.0746			299	0.0796	0.0623
4870	0.1217		4870	0.0897			300	0.0949	0.0746
4894	0.1476		4894	0.1163			301	0.1217	0.0897
4916	0.1661		4916	0.1497			302	0.1476	0.1163
4935	0.2064		4935	0.1584			303	0.1661	0.1497
4955	0.2525		4955	0.1767			304	0.2064	0.1584
4971	0.2945		4971	0.2			305	0.2525	0.1767
4983	0.262		4983	0.2			306	0.2945	0.2
4990	0.2218		4990	0.1842			307	0.262	0.2
5014	0.1882		5014	0.1633			308	0.2218	0.1842
5020	0.1537		5020	0.1258			309	0.1882	0.1633
5040	0.1103		5040	0.0942			310	0.1537	0.1258
5056	0.0916		5056	0.0862			311	0.1103	0.0942
5072	0.0792		5072	0.0663			312	0.0916	0.0862
5083	0.0818		5083	0.0659			313	0.0792	0.0663
5097	0.0781		5097	0.0653			314	0.0818	0.0659
5104	0.0667		5104	0.053			315	0.0781	0.0653
5125	0.0651		5125	0.0551			316	0.0667	0.053
5142	0.0571		5142	0.0509			317	0.0651	0.0551
5162	0.0596		5162	0.0527			318	0.0571	0.0509
5186	0.056		5186	0.0599			319	0.0596	0.0527
5201	0.0532		5201	0.0555			320	0.056	0.0599
5220	0.059		5220	0.0565			321	0.0532	0.0555
5227	0.0607		5227	0.0573			322	0.059	0.0565
5243	0.0668		5243	0.0609			323	0.0607	0.0573
5259	0.0676		5259	0.0631			324	0.0668	0.0609
5276	0.0702		5276	0.0668			325	0.0676	0.0631
5290	0.0836		5290	0.0901			326	0.0702	0.0668
5307	0.0897		5307	0.1081			327	0.0836	0.0901
5319	0.1342		5319	0.1603			328	0.0897	0.1081
5335	0.1456		5335	0.1742			329	0.1342	0.1603
5349	0.1895		5349	0.1784			330	0.1456	0.1742
5368	0.1777		5368	0.2145			331	0.1895	0.1784
5385	0.1633		5385	0.1906			332	0.1777	0.2145
5396	0.224		5396	0.2023			333	0.1633	0.1906
5407	0.2135		5407	0.1937			334	0.224	0.2023
5431	0.193		5431	0.2219			335	0.2135	0.1937
5450	0.1891		5450	0.2176			336	0.193	0.2219
5461	0.1576		5461	0.19			337	0.1891	0.2176
5481	0.1327		5481	0.1645			338	0.1576	0.19
5503	0.1277		5503	0.1511			339	0.1327	0.1645
5518	0.1307		5518	0.1442			340	0.1277	0.1511
5537	0.111		5537	0.1114			341	0.1307	0.1442
5556	0.1025		5556	0.0991			342	0.111	0.1114
5572	0.1072		5572	0.0929			343	0.1025	0.0991
5593	0.1221		5593	0.1299			344	0.1072	0.0929
5603	0.1105		5603	0.0986			345	0.1221	0.1299
5613	0.0818		5613	0.0739			346	0.1105	0.0986
5633	0.0918		5633	0.0827			347	0.0818	0.0739
5639	0.0867		5639	0.0882			348	0.0918	0.0827
5649	0.106		5649	0.1092			349	0.0867	0.0882
5666	0.1059		5666	0.1116			350	0.106	0.1092
5683	0.1244		5683	0.1113			351	0.1059	0.1116
5693	0.157		5693	0.1453			352	0.1244	0.1113
5703	0.1755		5703	0.1754			353	0.157	0.1453
5714	0.1734		5714	0.1498			354	0.1755	0.1754
5721	0.1843		5721	0.1801			355	0.1734	0.1498
5735	0.1886		5735	0.186			356	0.1843	0.1801
5754	0.1669		5754	0.1867			357	0.1886	0.186
5773	0.2088		5773	0.2748			358	0.1669	0.1867
5792	0.2027		5792	0.2557			359	0.2088	0.2748
5804	0.1974		5804	0.2261			360	0.2027	0.2557
5826	0.1675		5826	0.1744			361	0.1974	0.2261
5850	0.1419		5850	0.1144			362	0.1675	0.1744
5864	0.1366		5864	0.1157			363	0.1419	0.1144
5878	0.1196		5878	0.0868			364	0.1366	0.1157
5889	0.1252		5889	0.0812			365	0.1196	0.0868
5909	0.1169		5909	0.0872			366	0.1252	0.0812
5920	0.1148		5920	0.0938			367	0.1169	0.0872
5936	0.1215		5936	0.1012			368	0.1148	0.0938
5946	0.1336		5946	0.1131			369	0.1215	0.1012
5956	0.1523		5956	0.1294			370	0.1336	0.1131
5975	0.173		5975	0.1456			371	0.1523	0.1294
5989	0.2001		5989	0.2063			372	0.173	0.1456
6003	0.2084		6003	0.1905			373	0.2001	0.2063
6017	0.2155		6017	0.168			374	0.2084	0.1905
6033	0.2035		6033	0.1507			375	0.2155	0.168
6043	0.1605		6043	0.1455			376	0.2035	0.1507
6063	0.184		6063	0.2138			377	0.1605	0.1455
6080	0.221		6080	0.2179			378	0.184	0.2138
6094	0.2255		6094	0.2298			379	0.221	0.2179
6110	0.2273		6110	0.2654			380	0.2255	0.2298
6140	0.1906		6140	0.2371			381	0.2273	0.2654
6146	0.1576		6146	0.1878			382	0.1906	0.2371
6153	0.1496		6153	0.1789			383	0.1576	0.1878
6167	0.1525		6167	0.1814			384	0.1496	0.1789
6187	0.1456		6187	0.1631			385	0.1525	0.1814
6201	0.1608		6201	0.1769			386	0.1456	0.1631
6223	0.1542		6223	0.1669			387	0.1608	0.1769
6235	0.1345		6235	0.1374			388	0.1542	0.1669
6255	0.1422		6255	0.1469			389	0.1345	0.1374
6276	0.1593		6276	0.167			390	0.1422	0.1469
6288	0.1446		6288	0.1495			391	0.1593	0.167
6308	0.1363		6308	0.1331			392	0.1446	0.1495
6318	0.1614		6318	0.1559			393	0.1363	0.1331
6334	0.1685		6334	0.1719			394	0.1614	0.1559
6345	0.1584		6345	0.1535			395	0.1685	0.1719
6367	0.175		6367	0.1578			396	0.1584	0.1535
6374	0.1577		6374	0.1363			397	0.175	0.1578
6394	0.1754		6394	0.156			398	0.1577	0.1363
6414	0.23		6414	0.1958			399	0.1754	0.156
6436	0.2839		6436	0.2353			400	0.23	0.1958
6451	0.3417		6451	0.2694			401	0.2839	0.2353
6458	0.2668		6458	0.2085			402	0.3417	0.2694
6469	0.2808		6469	0.2119			403	0.2668	0.2085
6480	0.2006		6480	0.1351			404	0.2808	0.2119
6496	0.1788		6496	0.1315			405	0.2006	0.1351
6511	0.1554		6511	0.1307			406	0.1788	0.1315
6530	0.1582		6530	0.1348			407	0.1554	0.1307
6552	0.144		6552	0.1242			408	0.1582	0.1348
6569	0.1313		6569	0.1346			409	0.144	0.1242
6589	0.1283		6589	0.1423			410	0.1313	0.1346
6609	0.1513		6609	0.1213			411	0.1283	0.1423
6629	0.1614		6629	0.1232			412	0.1513	0.1213
6639	0.1523		6639	0.1003			413	0.1614	0.1232
6656	0.1826		6656	0.1252			414	0.1523	0.1003
6668	0.1952		6668	0.1663			415	0.1826	0.1252
6675	0.152		6675	0.1425			416	0.1952	0.1663
6689	0.1297		6689	0.1071			417	0.152	0.1425
6699	0.0958		6699	0.0953			418	0.1297	0.1071
6709	0.1137		6709	0.0937			419	0.0958	0.0953
6728	0.1302		6728	0.1145			420	0.1137	0.0937
6739	0.1005		6739	0.0923			421	0.1302	0.1145
6751	0.0804		6751	0.0751			422	0.1005	0.0923
6772	0.0962		6772	0.1003			423	0.0804	0.0751
6784	0.0948		6784	0.0886			424	0.0962	0.1003
6805	0.0697		6805	0.0764			425	0.0948	0.0886
6826	0.0922		6826	0.1095			426	0.0697	0.0764
6850	0.1015		6850	0.135			427	0.0922	0.1095
6871	0.0827		6871	0.0929			428	0.1015	0.135
6885	0.0991		6885	0.1091			429	0.0827	0.0929
6912	0.0871		6912	0.0935			430	0.0991	0.1091
6918	0.0671		6918	0.0685			431	0.0871	0.0935
6932	0.0532		6932	0.0546			432	0.0671	0.0685
6949	0.0509		6949	0.053			433	0.0532	0.0546
6960	0.0445		6960	0.0513			434	0.0509	0.053
6972	0.0462		6972	0.0545			435	0.0445	0.0513
6991	0.0498		6991	0.0508			436	0.0462	0.0545
7015	0.0458		7015	0.0488			437	0.0498	0.0508
7032	0.048		7032	0.0515			438	0.0458	0.0488
7051	0.0516		7051	0.0521			439	0.048	0.0515
7070	0.0518		7070	0.0513			440	0.0516	0.0521
7090	0.0502		7090	0.0513			441	0.0518	0.0513
7106	0.0501		7106	0.0514			442	0.0502	0.0513
7122	0.0516		7122	0.0508			443	0.0501	0.0514
7137	0.0545		7137	0.0512			444	0.0516	0.0508
7153	0.0558		7153	0.0526			445	0.0545	0.0512
7169	0.0581		7169	0.0571			446	0.0558	0.0526
7181	0.0615		7181	0.056			447	0.0581	0.0571
7203	0.0634		7203	0.0585			448	0.0615	0.056
7224	0.0669		7224	0.0625			449	0.0634	0.0585
7244	0.0725		7244	0.0757			450	0.0669	0.0625
7256	0.0852		7256	0.0861			451	0.0725	0.0757
7267	0.0764		7267	0.0759			452	0.0852	0.0861
7288	0.0909		7288	0.0868			453	0.0764	0.0759
7300	0.1067		7300	0.1095			454	0.0909	0.0868
7307	0.098		7307	0.0992			455	0.1067	0.1095
7314	0.0855		7314	0.1019			456	0.098	0.0992
7325	0.09		7325	0.1108			457	0.0855	0.1019
7344	0.0963		7344	0.1135			458	0.09	0.1108
7358	0.1039		7358	0.105			459	0.0963	0.1135
7368	0.123		7368	0.1271			460	0.1039	0.105
7382	0.1207		7382	0.14			461	0.123	0.1271
7399	0.1235		7399	0.1591			462	0.1207	0.14
7415	0.1487		7415	0.1946			463	0.1235	0.1591
7434	0.1785		7434	0.2005			464	0.1487	0.1946
7450	0.2586		7450	0.2042			465	0.1785	0.2005
7464	0.2023		7464	0.2199			466	0.2586	0.2042
7478	0.1748		7478	0.1866			467	0.2023	0.2199
7497	0.1923		7497	0.2125			468	0.1748	0.1866
7509	0.1618		7509	0.2206			469	0.1923	0.2125
7531	0.1359		7531	0.1999			470	0.1618	0.2206
7542	0.1098		7542	0.1755			471	0.1359	0.1999
7552	0.1099		7552	0.1937			472	0.1098	0.1755
7559	0.1119		7559	0.1482			473	0.1099	0.1937
7587	0.1133		7587	0.1149			474	0.1119	0.1482
7593	0.1117		7593	0.1266			475	0.1133	0.1149
7613	0.1362		7613	0.1767			476	0.1117	0.1266
7627	0.1538		7627	0.2096			477	0.1362	0.1767
7649	0.1644		7649	0.2104			478	0.1538	0.2096
7673	0.1668		7673	0.2024			479	0.1644	0.2104
7680	0.1599		7680	0.1816			480	0.1668	0.2024
7702	0.1376		7702	0.151			481	0.1599	0.1816
7712	0.155		7712	0.162			482	0.1376	0.151
7736	0.1533		7736	0.1595			483	0.155	0.162
7755	0.1266		7755	0.1493			484	0.1533	0.1595
7776	0.141		7776	0.157			485	0.1266	0.1493
7797	0.161		7797	0.1577			486	0.141	0.157
7809	0.1484		7809	0.1483			487	0.161	0.1577
7820	0.135		7820	0.1298			488	0.1484	0.1483
7837	0.1278		7837	0.1104			489	0.135	0.1298
7848	0.1161		7848	0.1042			490	0.1278	0.1104
7869	0.1161		7869	0.1012			491	0.1161	0.1042
7884	0.1055		7884	0.0911			492	0.1161	0.1012
7896	0.0947		7896	0.0834			493	0.1055	0.0911
7913	0.0916		7913	0.0824			494	0.0947	0.0834
7925	0.0914		7925	0.083			495	0.0916	0.0824
7935	0.0855		7935	0.08			496	0.0914	0.083
7954	0.0804		7954	0.0785			497	0.0855	0.08
7974	0.0834		7974	0.0796			498	0.0804	0.0785
7984	0.0759		7984	0.0769			499	0.0834	0.0796
8005	0.0671		8005	0.0717			500	0.0759	0.0769
8019	0.071		8019	0.0696			501	0.0671	0.0717
8041	0.0713		8041	0.0678			502	0.071	0.0696
8065	0.0628		8065	0.0597			503	0.0713	0.0678
8079	0.0622		8079	0.0579			504	0.0628	0.0597
8095	0.0867		8095	0.0629			505	0.0622	0.0579
8122	0.1182		8122	0.0639			506	0.0867	0.0629
8128	0.0955		8128	0.0668			507	0.1182	0.0639
8142	0.0966		8142	0.0731			508	0.0955	0.0668
8161	0.0822		8161	0.0677			509	0.0966	0.0731
8175	0.0856		8175	0.0778			510	0.0822	0.0677
8192	0.0829		8192	0.0899			511	0.0856	0.0778
8209	0.082		8209	0.1023			512	0.0829	0.0899
8223	0.0862		8223	0.0982			513	0.082	0.1023
8242	0.1075		8242	0.1047			514	0.0862	0.0982
8264	0.137		8264	0.1226			515	0.1075	0.1047
8285	0.1227		8285	0.1285			516	0.137	0.1226
8295	0.1302		8295	0.137			517	0.1227	0.1285
8314	0.1458		8314	0.1363			518	0.1302	0.137
8325	0.1735		8325	0.143			519	0.1458	0.1363
8335	0.1799		8335	0.141			520	0.1735	0.143
8357	0.164		8357	0.1189			521	0.1799	0.141
8371	0.1405		8371	0.1056			522	0.164	0.1189
8395	0.1064		8395	0.0962			523	0.1405	0.1056
8405	0.0973		8405	0.0926			524	0.1064	0.0962
8429	0.0793		8429	0.0896			525	0.0973	0.0926
8443	0.0814		8443	0.1017			526	0.0793	0.0896
8459	0.0789		8459	0.1047			527	0.0814	0.1017
8469	0.0833		8469	0.1369			528	0.0789	0.1047
8476	0.0929		8476	0.1674			529	0.0833	0.1369
8492	0.0882		8492	0.1231			530	0.0929	0.1674
8503	0.0883		8503	0.0933			531	0.0882	0.1231
8522	0.0869		8522	0.1005			532	0.0883	0.0933
8533	0.0845		8533	0.1216			533	0.0869	0.1005
8544	0.0854		8544	0.118			534	0.0845	0.1216
8558	0.0931		8558	0.0921			535	0.0854	0.118
8575	0.086		8575	0.0837			536	0.0931	0.0921
8589	0.0783		8589	0.0907			537	0.086	0.0837
8603	0.0867		8603	0.0931			538	0.0783	0.0907
8627	0.0888		8627	0.0962			539	0.0867	0.0931
8644	0.0813		8644	0.0892			540	0.0888	0.0962
8664	0.0889		8664	0.0921			541	0.0813	0.0892
8681	0.0932		8682	0.0949			542	0.0889	0.0921
8698	0.0824		8699	0.0893			543	0.0932	0.0949
8720	0.0842		8721	0.0838			544	0.0824	0.0893
8739	0.1009		8740	0.098			545	0.0842	0.0838
8758	0.0963		8759	0.0992			546	0.1009	0.098
8780	0.0833		8781	0.0839			547	0.0963	0.0992
8791	0.0876		8792	0.0787			548	0.0833	0.0839
8810	0.1106		8811	0.1017			549	0.0876	0.0787
8820	0.1037		8821	0.103			550	0.1106	0.1017
8830	0.0832		8831	0.0831			551	0.1037	0.103
8844	0.0881		8845	0.0853			552	0.0832	0.0831
8868	0.0941		8869	0.0863			553	0.0881	0.0853
8875	0.0786		8876	0.0697			554	0.0941	0.0863
8885	0.0672		8886	0.0608			555	0.0786	0.0697
8899	0.0686		8900	0.0587			556	0.0672	0.0608
8915	0.0743		8916	0.0633			557	0.0686	0.0587
8931	0.092		8932	0.0715			558	0.0743	0.0633
8950	0.1075		8951	0.0835			559	0.092	0.0715
8957	0.0852		8958	0.0743			560	0.1075	0.0835
8971	0.0884		8972	0.0779			561	0.0852	0.0743
8982	0.081		8983	0.0695			562	0.0884	0.0779
9004	0.0765		9005	0.0692			563	0.081	0.0695
9024	0.0861		9025	0.083			564	0.0765	0.0692
9045	0.0836		9046	0.0817			565	0.0861	0.083
9052	0.0793		9053	0.0759			566	0.0836	0.0817
9059	0.0717		9060	0.0654			567	0.0793	0.0759
9083	0.0748		9084	0.0685			568	0.0717	0.0654
9100	0.0798		9101	0.0748			569	0.0748	0.0685
9114	0.0769		9115	0.0691			570	0.0798	0.0748
9131	0.0746		9132	0.0623			571	0.0769	0.0691
9150	0.08		9151	0.0703			572	0.0746	0.0623
9172	0.0842		9173	0.0776			573	0.08	0.0703
9186	0.0835		9187	0.0738			574	0.0842	0.0776
9202	0.0812		9203	0.0701			575	0.0835	0.0738
9223	0.0913		9224	0.0855			576	0.0812	0.0701
9234	0.0941		9235	0.0807			577	0.0913	0.0855
9246	0.0851		9247	0.0786			578	0.0941	0.0807
9262	0.0945		9263	0.102			579	0.0851	0.0786
9277	0.0947		9278	0.0883			580	0.0945	0.102
9299	0.0896		9300	0.0704			581	0.0947	0.0883
9305	0.0862		9306	0.0689			582	0.0896	0.0704
9322	0.0831		9323	0.0614			583	0.0862	0.0689
9341	0.08		9342	0.0606			584	0.0831	0.0614
9358	0.079		9359	0.0649			585	0.08	0.0606
9365	0.0743		9366	0.0641			586	0.079	0.0649
9389	0.075		9390	0.0652			587	0.0743	0.0641
9401	0.0737		9402	0.0631			588	0.075	0.0652
9430	0.0856		9431	0.0649			589	0.0737	0.0631
9436	0.0885		9437	0.0662			590	0.0856	0.0649
9458	0.0849		9459	0.0859			591	0.0885	0.0662
9469	0.0906		9470	0.0864			592	0.0849	0.0859
9481	0.1022		9482	0.0654			593	0.0906	0.0864
9505	0.1039		9506	0.0637			594	0.1022	0.0654
9515	0.0652		9516	0.0645			595	0.1039	0.0637
9540	0.066		9541	0.0608			596	0.0652	0.0645
9546	0.0594		9547	0.0496			597	0.066	0.0608
9560	0.0597		9561	0.052			598	0.0594	0.0496
9577	0.0629		9578	0.051			599	0.0597	0.052
9596	0.0621		9597	0.0503			600	0.0629	0.051
9620	0.0578		9621	0.0474			601	0.0621	0.0503
9639	0.0569		9640	0.0513			602	0.0578	0.0474
9656	0.0634		9657	0.0534			603	0.0569	0.0513
9666	0.0679		9667	0.0543			604	0.0634	0.0534
9677	0.0709		9678	0.0643			605	0.0679	0.0543
9696	0.0667		9697	0.0745			606	0.0709	0.0643
9712	0.0639		9713	0.078			607	0.0667	0.0745
9731	0.0686		9732	0.0743			608	0.0639	0.078
9741	0.0674		9742	0.0769			609	0.0686	0.0743
9765	0.0734		9766	0.0788			610	0.0674	0.0769
9787	0.0754		9788	0.0838			611	0.0734	0.0788
9804	0.0813		9805	0.1074			612	0.0754	0.0838
9818	0.1098		9819	0.1381			613	0.0813	0.1074
9832	0.0977		9833	0.1137			614	0.1098	0.1381
9843	0.0825		9844	0.08			615	0.0977	0.1137
9854	0.0849		9855	0.0835			616	0.0825	0.08
9865	0.0787		9866	0.0835			617	0.0849	0.0835
9884	0.0734		9885	0.078			618	0.0787	0.0835
9895	0.0689		9896	0.0698			619	0.0734	0.078
9912	0.0676		9913	0.0632			620	0.0689	0.0698
9936	0.0604		9937	0.0603			621	0.0676	0.0632
9956	0.0571		9957	0.0584			622	0.0604	0.0603
9977	0.0596		9978	0.0572			623	0.0571	0.0584
10001	0.0574		10002	0.053			624	0.0596	0.0572
10020	0.0529		10021	0.0503			625	0.0574	0.053
10030	0.0548		10031	0.0528			626	0.0529	0.0503
10044	0.0646		10045	0.0585			627	0.0548	0.0528
10059	0.0612		10060	0.0537			628	0.0646	0.0585
10070	0.0618		10071	0.0521			629	0.0612	0.0537
10080	0.0759		10081	0.0564			630	0.0618	0.0521
10097	0.0637		10098	0.0544			631	0.0759	0.0564
10113	0.0612		10114	0.055			632	0.0637	0.0544
10132	0.0672		10133	0.0606			633	0.0612	0.055
10143	0.0682		10144	0.0603			634	0.0672	0.0606
10158	0.0835		10159	0.0598			635	0.0682	0.0603
10175	0.0778		10176	0.066			636	0.0835	0.0598
10191	0.0906		10192	0.0773			637	0.0778	0.066
10208	0.1012		10209	0.09			638	0.0906	0.0773
10219	0.1257		10220	0.1074			639	0.1012	0.09
10226	0.1519		10227	0.123			640	0.1257	0.1074
10233	0.1144		10234	0.093			641	0.1519	0.123
10244	0.0961		10245	0.0759			642	0.1144	0.093
10263	0.0978		10264	0.0655			643	0.0961	0.0759
10284	0.0953		10285	0.0646			644	0.0978	0.0655
10300	0.0941		10301	0.0748			645	0.0953	0.0646
10330	0.1038		10331	0.0823			646	0.0941	0.0748
10336	0.08		10337	0.0709			647	0.1038	0.0823
10343	0.0711		10344	0.0775			648	0.08	0.0709
10350	0.0696		10351	0.0805			649	0.0711	0.0775
10364	0.0678		10365	0.0826			650	0.0696	0.0805
10375	0.0773		10376	0.0836			651	0.0678	0.0826
10386	0.0774		10387	0.0967			652	0.0773	0.0836
10393	0.074		10394	0.1064			653	0.0774	0.0967
10405	0.0774		10406	0.145			654	0.074	0.1064
10415	0.0673		10416	0.0702			655	0.0774	0.145
10429	0.0599		10430	0.0593			656	0.0673	0.0702
10443	0.0624		10444	0.062			657	0.0599	0.0593
10453	0.0585		10454	0.0595			658	0.0624	0.062
10474	0.0572		10475	0.0561			659	0.0585	0.0595
10484	0.0581		10485	0.0544			660	0.0572	0.0561
10498	0.0567		10499	0.0543			661	0.0581	0.0544
10509	0.0535		10510	0.0519			662	0.0567	0.0543
10525	0.0519		10526	0.054			663	0.0535	0.0519
10545	0.0532		10546	0.0537			664	0.0519	0.054
10559	0.0506		10560	0.0489			665	0.0532	0.0537
10578	0.0478		10579	0.0495			666	0.0506	0.0489
10589	0.05		10590	0.0506			667	0.0478	0.0495
10606	0.0528		10607	0.0547			668	0.05	0.0506
10616	0.0498		10617	0.0526			669	0.0528	0.0547
10632	0.0474		10633	0.0482			670	0.0498	0.0526
10646	0.0534		10647	0.0511			671	0.0474	0.0482
10656	0.0548		10657	0.0533			672	0.0534	0.0511
10670	0.0508		10671	0.0526			673	0.0548	0.0533
10686	0.0525		10687	0.0547			674	0.0508	0.0526
10700	0.0603		10701	0.0626			675	0.0525	0.0547
10710	0.0618		10711	0.0668			676	0.0603	0.0626
10729	0.0564		10730	0.0662			677	0.0618	0.0668
10748	0.0643		10749	0.0769			678	0.0564	0.0662
10759	0.0763		10760	0.1001			679	0.0643	0.0769
10773	0.0873		10774	0.1045			680	0.0763	0.1001
10785	0.0946		10786	0.1218			681	0.0873	0.1045
10792	0.1452		10793	0.1831			682	0.0946	0.1218
10806	0.1433		10807	0.1718			683	0.1452	0.1831
10828	0.1091		10829	0.1391			684	0.1433	0.1718
10847	0.138		10848	0.1987			685	0.1091	0.1391
10857	0.1125		10858	0.1416			686	0.138	0.1987
10869	0.1085		10870	0.1289			687	0.1125	0.1416
10891	0.0945		10892	0.0914			688	0.1085	0.1289
10912	0.0807		10913	0.0864			689	0.0945	0.0914
10928	0.0826		10929	0.1084			690	0.0807	0.0864
10952	0.0792		10953	0.0978			691	0.0826	0.1084
10966	0.0684		10967	0.0705			692	0.0792	0.0978
10985	0.063		10986	0.0734			693	0.0684	0.0705
11002	0.0702		11003	0.0824			694	0.063	0.0734
11019	0.0699		11020	0.0778			695	0.0702	0.0824
11043	0.0602		11044	0.0629			696	0.0699	0.0778
11062	0.057		11063	0.0756			697	0.0602	0.0629
11083	0.0683		11084	0.0881			698	0.057	0.0756
11098	0.0696		11099	0.075			699	0.0683	0.0881
11109	0.0597		11110	0.0636			700	0.0696	0.075
11128	0.0707		11129	0.0983			701	0.0597	0.0636
11149	0.1023		11150	0.1145			702	0.0707	0.0983
11173	0.1143		11174	0.1085			703	0.1023	0.1145
11187	0.1231		11188	0.1276			704	0.1143	0.1085
11211	0.1648		11212	0.1279			705	0.1231	0.1276
11223	0.1422		11224	0.1152			706	0.1648	0.1279
11239	0.1094		11240	0.0903			707	0.1422	0.1152
11251	0.0947		11252	0.0869			708	0.1094	0.0903
11265	0.0896		11266	0.0827			709	0.0947	0.0869
11277	0.0723		11278	0.067			710	0.0896	0.0827
11297	0.0655		11298	0.0615			711	0.0723	0.067
11313	0.0738		11314	0.0668			712	0.0655	0.0615
11327	0.0754		11328	0.0675			713	0.0738	0.0668
11342	0.0651		11343	0.0585			714	0.0754	0.0675
11362	0.0654		11363	0.0582			715	0.0651	0.0585
11383	0.0741		11384	0.0648			716	0.0654	0.0582
11393	0.068		11394	0.0585			717	0.0741	0.0648
11414	0.0651		11415	0.0552			718	0.068	0.0585
11433	0.0756		11434	0.0642			719	0.0651	0.0552
11457	0.0781		11458	0.0657			720	0.0756	0.0642
11479	0.0734		11480	0.0604			721	0.0781	0.0657
11496	0.0678		11497	0.0559			722	0.0734	0.0604
11516	0.0687		11517	0.0552			723	0.0678	0.0559
11527	0.0692		11528	0.0562			724	0.0687	0.0552
11544	0.0666		11545	0.0552			725	0.0692	0.0562
11561	0.0647		11562	0.0555			726	0.0666	0.0552
11580	0.0805		11581	0.0674			727	0.0647	0.0555
11599	0.0975		11600	0.08			728	0.0805	0.0674
11610	0.0912		11611	0.1766			729	0.0975	0.08
11622	0.0906		11623	0.0734			730	0.0912	0.1766
11634	0.0736		11635	0.0632			731	0.0906	0.0734
11644	0.071		11645	0.0601			732	0.0736	0.0632
11660	0.0682		11661	0.0544			733	0.071	0.0601
11676	0.0753		11677	0.0571			734	0.0682	0.0544
11687	0.0778		11688	0.0628			735	0.0753	0.0571
11707	0.0816		11708	0.0693			736	0.0778	0.0628
11721	0.0889		11722	0.08			737	0.0816	0.0693
11732	0.0921		11733	0.0923			738	0.0889	0.08
11746	0.0819		11747	0.0848			739	0.0921	0.0923
11767	0.0877		11768	0.0968			740	0.0819	0.0848
11777	0.1045		11778	0.1125			741	0.0877	0.0968
11788	0.0958		11789	0.102			742	0.1045	0.1125
11805	0.0929		11806	0.1029			743	0.0958	0.102
11812	0.0804		11813	0.0942			744	0.0929	0.1029
11831	0.072		11832	0.073			745	0.0804	0.0942
11847	0.0698		11848	0.069			746	0.072	0.073
11857	0.0786		11858	0.0851			747	0.0698	0.069
11868	0.0738		11869	0.0811			748	0.0786	0.0851
11887	0.0705		11888	0.0713			749	0.0738	0.0811
11909	0.0592		11910	0.0584			750	0.0705	0.0713
11923	0.0641		11924	0.0602			751	0.0592	0.0584
11943	0.0654		11944	0.0614			752	0.0641	0.0602
11965	0.0617		11966	0.0599			753	0.0654	0.0614
11976	0.0598		11977	0.0553			754	0.0617	0.0599
11992	0.0656		11993	0.0549			755	0.0598	0.0553
12011	0.0645		12012	0.058			756	0.0656	0.0549
12032	0.0721		12033	0.0607			757	0.0645	0.058
12053	0.0878		12054	0.0619			758	0.0721	0.0607
12070	0.0739		12071	0.0558			759	0.0878	0.0619
12084	0.0855		12085	0.0573			760	0.0739	0.0558
12098	0.0882		12099	0.0587			761	0.0855	0.0573
12114	0.0928		12115	0.0656			762	0.0882	0.0587
12134	0.0974		12135	0.0699			763	0.0928	0.0656
12151	0.1175		12152	0.0814			764	0.0974	0.0699
12162	0.1174		12163	0.0874			765	0.1175	0.0814
12177	0.1409		12178	0.0945			766	0.1174	0.0874
12187	0.1181		12188	0.0887			767	0.1409	0.0945
12209	0.0924		12210	0.0736			768	0.1181	0.0887
12220	0.0976		12221	0.074			769	0.0924	0.0736
12244	0.0981		12245	0.0772			770	0.0976	0.074
12258	0.099		12259	0.0798			771	0.0981	0.0772
12273	0.1059		12274	0.0896			772	0.099	0.0798
12287	0.1255		12288	0.1021			773	0.1059	0.0896
12299	0.0989		12300	0.0881			774	0.1255	0.1021
12318	0.1068		12319	0.1055			775	0.0989	0.0881
12332	0.1054		12333	0.0969			776	0.1068	0.1055
12354	0.0908		12355	0.0844			777	0.1054	0.0969
12369	0.0837		12370	0.0731			778	0.0908	0.0844
12375	0.0957		12376	0.0738			779	0.0837	0.0731
12392	0.0977		12393	0.0854			780	0.0957	0.0738
12407	0.0845		12408	0.075			781	0.0977	0.0854
12427	0.0922		12428	0.081			782	0.0845	0.075
12438	0.1005		12439	0.0826			783	0.0922	0.081
12449	0.0856		12450	0.0756			784	0.1005	0.0826
12466	0.0816		12467	0.0764			785	0.0856	0.0756
12483	0.0758		12484	0.073			786	0.0816	0.0764
12497	0.0838		12498	0.0815			787	0.0758	0.073
12514	0.0896		12515	0.0911			788	0.0838	0.0815
12533	0.0982		12534	0.1041			789	0.0896	0.0911
12549	0.1328		12550	0.1398			790	0.0982	0.1041
12571	0.1738		12572	0.1762			791	0.1328	0.1398
12588	0.2365		12589	0.2407			792	0.1738	0.1762
12595	0.2393		12596	0.245			793	0.2365	0.2407
12607	0.1659		12608	0.1676			794	0.2393	0.245
12619	0.119		12620	0.1219			795	0.1659	0.1676
12640	0.0945		12641	0.0917			796	0.119	0.1219
12656	0.0796		12657	0.0743			797	0.0945	0.0917
12677	0.0784		12678	0.071			798	0.0796	0.0743
12704	0.0759		12705	0.0656			799	0.0784	0.071
12710	0.0821		12711	0.0723			800	0.0759	0.0656
12739	0.089		12740	0.0784			801	0.0821	0.0723
12745	0.0997		12746	0.0967			802	0.089	0.0784
12765	0.0944		12766	0.0995			803	0.0997	0.0967
12771	0.1088		12772	0.1036			804	0.0944	0.0995
12782	0.0979		12783	0.1112			805	0.1088	0.1036
12806	0.0862		12807	0.1027			806	0.0979	0.1112
12825	0.1021		12826	0.1005			807	0.0862	0.1027
12844	0.1116		12845	0.1133			808	0.1021	0.1005
12851	0.1053		12852	0.1269			809	0.1116	0.1133
12861	0.1108		12862	0.1223			810	0.1053	0.1269
12868	0.1225		12869	0.1356			811	0.1108	0.1223
12879	0.1265		12880	0.1488			812	0.1225	0.1356
12899	0.139		12900	0.1392			813	0.1265	0.1488
12915	0.1566		12916	0.1709			814	0.139	0.1392
12927	0.1717		12928	0.1793			815	0.1566	0.1709
12939	0.1817		12940	0.1917			816	0.1717	0.1793
12958	0.2082		12959	0.2026			817	0.1817	0.1917
12974	0.1773		12975	0.1767			818	0.2082	0.2026
12996	0.1621		12997	0.1637			819	0.1773	0.1767
13010	0.1846		13011	0.1608			820	0.1621	0.1637
13022	0.1579		13023	0.1398			821	0.1846	0.1608
13029	0.1648		13030	0.1456			822	0.1579	0.1398
13043	0.1646		13044	0.1602			823	0.1648	0.1456
13062	0.1453		13063	0.1457			824	0.1646	0.1602
13079	0.1376		13080	0.1216			825	0.1453	0.1457
13098	0.137		13099	0.1166			826	0.1376	0.1216
13113	0.1233		13114	0.1093			827	0.137	0.1166
13137	0.1131		13138	0.0974			828	0.1233	0.1093
13157	0.1079		13158	0.091			829	0.1131	0.0974
13173	0.1041		13174	0.0878			830	0.1079	0.091
13184	0.0964		13185	0.0809			831	0.1041	0.0878
13203	0.0893		13204	0.0771			832	0.0964	0.0809
13213	0.0848		13214	0.0729			833	0.0893	0.0771
13232	0.0943		13233	0.0729			834	0.0848	0.0729
13244	0.1016		13245	0.0754			835	0.0943	0.0729
13254	0.0819		13255	0.0733			836	0.1016	0.0754
13283	0.0795		13284	0.0708			837	0.0819	0.0733
13289	0.0871		13290	0.0795			838	0.0795	0.0708
13308	0.0976		13309	0.0897			839	0.0871	0.0795
13322	0.1052		13323	0.0948			840	0.0976	0.0897
13344	0.1095		13345	0.099			841	0.1052	0.0948
13369	0.1469		13370	0.1313			842	0.1095	0.099
13375	0.1462		13376	0.1333			843	0.1469	0.1313
13389	0.1576		13390	0.1427			844	0.1462	0.1333
13406	0.1552		13407	0.1392			845	0.1576	0.1427
13421	0.121		13422	0.1051			846	0.1552	0.1392
13442	0.1173		13443	0.1001			847	0.121	0.1051
13452	0.1248		13453	0.1011			848	0.1173	0.1001
13464	0.1015		13465	0.0893			849	0.1248	0.1011
13480	0.1021		13481	0.0839			850	0.1015	0.0893
13500	0.1106		13501	0.0999			851	0.1021	0.0839
13517	0.1053		13518	0.1019			852	0.1106	0.0999
13536	0.0994		13537	0.0931			853	0.1053	0.1019
13557	0.108		13558	0.1032			854	0.0994	0.0931
13576	0.1202		13577	0.1198			855	0.108	0.1032
13593	0.122		13594	0.1169			856	0.1202	0.1198
13614	0.1273		13615	0.1146			857	0.122	0.1169
13633	0.1427		13634	0.1331			858	0.1273	0.1146
13657	0.1509		13658	0.1412			859	0.1427	0.1331
13679	0.1581		13680	0.137			860	0.1509	0.1412
13698	0.1714		13699	0.1454			861	0.1581	0.137
13715	0.1882		13716	0.1645			862	0.1714	0.1454
13727	0.199		13728	0.1696			863	0.1882	0.1645
13742	0.2075		13743	0.169			864	0.199	0.1696
13761	0.2255		13762	0.1847			865	0.2075	0.169
13775	0.2464		13776	0.2032			866	0.2255	0.1847
13782	0.2675		13783	0.2295			867	0.2464	0.2032
13800	0.2913		13800	0.2415			868	0.2675	0.2295
13817	0.3645		13817	0.271			869	0.2913	0.2415
13836	0.4259		13836	0.3198			870	0.3645	0.271
13848	0.5246		13848	0.3533			871	0.4259	0.3198
13865	0.5118		13865	0.3729			872	0.5246	0.3533
13886	0.5821		13886	0.4539			873	0.5118	0.3729
13897	0.5093		13897	0.4309			874	0.5821	0.4539
13913	0.4416		13913	0.3856			875	0.5093	0.4309
13930	0.5053		13930	0.3694			876	0.4416	0.3856
13949	0.42		13949	0.3931			877	0.5053	0.3694
13963	0.3354		13963	0.3678			878	0.42	0.3931
13977	0.3287		13977	0.322			879	0.3354	0.3678
13989	0.306		13989	0.2498			880	0.3287	0.322
14003	0.212		14003	0.1806			881	0.306	0.2498
14017	0.1966		14017	0.1691			882	0.212	0.1806
14028	0.1678		14028	0.1389			883	0.1966	0.1691
14052	0.1387		14052	0.1303			884	0.1678	0.1389
14073	0.1378		14073	0.1464			885	0.1387	0.1303
14097	0.1365		14097	0.1433			886	0.1378	0.1464
14120	0.1166		14120	0.1156			887	0.1365	0.1433
14126	0.1229		14126	0.1159			888	0.1166	0.1156
14141	0.1153		14141	0.1012			889	0.1229	0.1159
14161	0.0903		14161	0.0833			890	0.1153	0.1012
14182	0.0916		14182	0.0908			891	0.0903	0.0833
14197	0.1024		14197	0.1003			892	0.0916	0.0908
14207	0.0921		14207	0.0833			893	0.1024	0.1003
14224	0.081		14224	0.0779			894	0.0921	0.0833
14245	0.1009		14245	0.1015			895	0.081	0.0779
14267	0.149		14267	0.1409			896	0.1009	0.1015
14273	0.2146		14273	0.2005			897	0.149	0.1409
14290	0.3434		14290	0.3954			898	0.2146	0.2005
							899	0.3434	0.3954
