# Supplementary material for: Repurposing FDA-approved phytomedicines, natural products, antivirals and cell protectives against SARS-CoV-2 (COVID-19) RNA-dependent RNA polymerase
Source: PeerJ journal article supplement (doi:10.7717/peerj.10480), 2020-11-30
Supplement: supplementary_file1.pdf [file supplementary_file1.pdf]

| Name                                 | MolWeight | CAS          | docking score | glide ligand efficiency | glide lipo | glide hbond | glide evdw |
|--------------------------------------|-----------|--------------|---------------|-------------------------|------------|-------------|------------|
| NAD+                                 | 663.4     | 53-84-9      | -8.2          | -0.2                    | -0.9       | -0.5        | -56.2      |
| Sennoiside B                         | 862.7     | 128-57-4     | -8.1          | -0.1                    | -0.6       | -0.2        | -58.8      |
| Leucovorin Calcium Pentahydrate      | 601.6     | 6035-45-6    | -8.1          | -0.2                    | -0.3       | -1.5        | -32.2      |
| Thymopentin                          | 679.8     | 69558-55-0   | -7.9          | -0.2                    | -1.6       | -1.5        | -50.3      |
| Digoxin                              | 780.9     | 20830-75-5   | -7.8          | -0.1                    | -2.4       | -0.2        | -62.4      |
| Ritonavir                            | 720.9     | 155213-67-5  | -7.7          | -0.2                    | -2.9       | -0.3        | -67.9      |
| Asiaticoside                         | 959.1     | 16830-15-2   | -7.6          | -0.1                    | -1.8       | 0.0         | -50.4      |
| Glycyrrhizin (Glycyrrhizic Acid)     | 822.9     | 1405-86-3    | -7.6          | -0.1                    | -0.8       | 0.0         | -55.6      |
| Neohesperidin dihydrochalcone (Nhdc) | 612.6     | 20702-77-6   | -7.5          | -0.2                    | -1.4       | -0.1        | -46.7      |
| Venetoclax (ABT-199, GDC-0199)       | 868.4     | 1257044-40-8 | -7.5          | -0.1                    | -2.5       | -0.6        | -64.0      |
| Taxifolin (Dihydroquercetin)         | 304.3     | 480-18-2     | -7.4          | -0.3                    | -1.3       | -0.4        | -23.7      |
| Oxiglutatione                        | 612.6     | 27025-41-8   | -7.4          | -0.2                    | -0.8       | -0.8        | -48.2      |
| Iopamidol                            | 777.1     | 60166-93-0   | -7.4          | -0.2                    | -0.9       | -1.1        | -37.1      |
| (-)-Epicatechin gallate              | 442.4     | 1257-08-5    | -7.3          | -0.2                    | -1.3       | -0.4        | -31.8      |
| Acarbose                             | 645.6     | 56180-94-0   | -7.3          | -0.2                    | -1.2       | -0.3        | -37.2      |
| Chlorhexidine HCl                    | 578.4     | 3697-42-5    | -7.3          | -0.2                    | -1.9       | -0.4        | -39.7      |
| Salvianolic acid B                   | 718.6     | 121521-90-2  | -7.3          | -0.1                    | -1.2       | 0.0         | -55.3      |
| Sennoiside A                         | 862.7     | 81-27-6      | -7.2          | -0.1                    | -0.8       | 0.0         | -45.6      |
| Troxerutin                           | 742.7     | 7085-55-4    | -7.2          | -0.1                    | -1.0       | -0.5        | -42.1      |
| Cefodizime Sodium                    | 628.6     | 86329-79-5   | -7.2          | -0.2                    | -1.0       | -0.9        | -44.0      |
| (-)Epicatechin                       | 290.3     | 490-46-0     | -7.1          | -0.3                    | -1.0       | -0.6        | -22.0      |
| Ioversol                             | 807.1     | 87771-40-2   | -7.1          | -0.2                    | -0.7       | -1.1        | -38.1      |
| Quercetin (Sophoretin)               | 302.2     | 117-39-5     | -7.1          | -0.3                    | -1.1       | -0.4        | -25.1      |
| Quercetin dihydrate (Sophoretin)     | 338.3     | 6151-25-3    | -7.1          | -0.3                    | -1.1       | -0.4        | -25.1      |
| Pyrantel Pamoate                     | 594.7     | 22204-24-6   | -7.1          | -0.2                    | -1.9       | -0.2        | -34.4      |
| Cobicistat (GS-9350)                 | 776.0     | 1004316-88-4 | -7.0          | -0.1                    | -2.8       | -0.4        | -63.7      |
| Aloin (Barbaloin)                    | 418.4     | 1415-73-2    | -7.0          | -0.2                    | -1.5       | -0.3        | -28.3      |
| Clofarabine                          | 303.677   | 123318-82-1  | -6.969        | -0.348                  | -0.332     | -0.428      | -26.543    |
| Bergenin (Cuscutin)                  | 328.271   | 477-90-7     | -6.948        | -0.302                  | -1.16      | -0.32       | -20.808    |
| Neomycin sulfate                     | 712.722   | 1405-10-3    | -6.941        | -0.165                  | -0.582     | -0.57       | -38.273    |
| Mizoribine (Bredinin)                | 259.216   | 50924-49-7   | -6.933        | -0.385                  | -0.8       | -0.635      | -20.257    |
| Temozolomide                         | 194.151   | 85622-93-1   | -6.917        | -0.494                  | 0          | -1.219      | -24.981    |
| Catalpol                             | 362.329   | 2415-24-9    | -6.906        | -0.276                  | -1.247     | 0           | -23.646    |
| Protirelin                           | 362.384   | 24305-27-9   | -6.89         | -0.265                  | -0.851     | -1.237      | -31.101    |

|                                  |          |                  |        |        |        |        |         |
|----------------------------------|----------|------------------|--------|--------|--------|--------|---------|
| Neohesperidin                    | 610.561  | 13241-33-3       | -6.88  | -0.16  | -1.264 | -0.371 | -38.025 |
| Cyclo(RGDyK)                     | 849.733  | 250612-42-1      | -6.863 | -0.156 | -0.894 | -1.331 | -45.493 |
| Chlorthalidone                   | 338.766  | 77-36-1          | -6.859 | -0.312 | -1.098 | -0.906 | -30.898 |
| Diammonium Glycyrrhizinate       | 856.993  | 79165-06-3       | -6.858 | -0.118 | -0.304 | -0.067 | -48.962 |
| Resveratrol                      | 228.243  | 501-36-0         | -6.849 | -0.403 | -1.4   | -0.72  | -19.559 |
| Isoquercitrin                    | 464.376  | 482-35-9         | -6.83  | -0.207 | -1.551 | -0.32  | -37.25  |
| Echinacoside                     | 786.728  | 82854-37-3       | -6.819 | -0.124 | -1.249 | 0      | -45.529 |
| Isoprinosine                     | 1115.233 | 36703-88-5       | -6.809 | -0.358 | -0.717 | -0.48  | -16.47  |
| Inosine                          | 268.226  | 58-63-9          | -6.808 | -0.358 | -0.717 | -0.48  | -16.479 |
| Rutin (Rutoside)                 | 610.518  | 153-18-4         | -6.803 | -0.158 | -0.871 | 0      | -40.521 |
| Luteolin                         | 286.236  | 491-70-3         | -6.761 | -0.322 | -1.057 | -0.304 | -20.317 |
| bentiromide                      | 404.415  | 37106-97-1       | -6.76  | -0.225 | -1.645 | -0.434 | -35.623 |
| ceftazidime pentahydrate         | 636.652  | 78439-06-2       | -6.752 | -0.182 | -1.278 | -0.515 | -43.42  |
| Oleuropein                       | 540.514  | 32619-42-4       | -6.725 | -0.177 | -1.105 | -0.248 | -35.154 |
| Lenalidomide (CC-5013)           | 259.261  | 191732-72-6      | -6.723 | -0.354 | -0.837 | -0.658 | -30.929 |
| Pralatrexate(Folotyn)            | 477.473  | 146464-95-1      | -6.701 | -0.191 | -0.849 | -1.182 | -37.38  |
| Kaempferol                       | 286.236  | 520-18-3         | -6.669 | -0.318 | -1.087 | -0.652 | -23.217 |
| Nilotinib (AMN-107)              | 529.516  | 641571-10-0      | -6.657 | -0.171 | -2.517 | -0.32  | -53.458 |
| Dichlorphenamide (Diclofenamide) | 305.159  | 120-97-8         | -6.638 | -0.415 | -0.458 | -0.77  | -24.707 |
| Didanosine (Videx)               | 236.227  | 69655-05-6       | -6.624 | -0.39  | -0.556 | -0.565 | -24.646 |
| Novobiocin sodium (Albamycin)    | 634.606  | 1476-53-5        | -6.59  | -0.15  | -1.772 | -0.415 | -45.099 |
| Diacerein                        | 368.294  | 13739-02-1       | -6.588 | -0.244 | -1.262 | -0.468 | -34.361 |
| Liquiritin                       | 418.394  | 551-15-5         | -6.583 | -0.219 | -1.146 | -0.205 | -30.824 |
| Doxifluridine                    | 246.192  | 436349           | -6.577 | -0.387 | -0.506 | -0.617 | -23.126 |
| Bismuth Subcitrate Potassium     | 782.671  | 880149-29-1      | -6.572 | -0.506 | 0      | -0.825 | -8.971  |
| Morin hydrate (Aurantica)        | 320.251  | 6202-27-3        | -6.57  | -0.299 | -1.058 | -0.577 | -29.029 |
| Notoginsenoside R1               | 933.127  | 80418-24-2       | -6.563 | -0.101 | -0.98  | 0      | -43.573 |
| Ammonium Glycyrrhizinate (AMGZ)  | 839.963  | 1407-03-0        | -6.545 | -0.113 | -0.264 | -0.32  | -51.998 |
| Ceftiofur hydrochloride          | 560.024  | 103980-44-5      | -6.543 | -0.192 | -1.503 | -0.466 | -53.992 |
| Guanosine                        | 283.241  | 118-00-3         | -6.525 | -0.326 | -0.832 | -0.302 | -27.699 |
| Cilengitide trifluoroacetate     | 702.679  | 188968-51-6      | -6.522 | -0.155 | -1.205 | -0.847 | -37.518 |
| Clodronate Disodium              | 288.856  | 22560-50-5, 1059 | -6.504 | -0.591 | 0      | -0.84  | -9.987  |
| 5-hydroxytryptophan (5-HTP)      | 220.225  | 56-69-9          | -6.503 | -0.406 | -1.251 | -0.633 | -19.379 |
| Zileuton                         | 236.29   | 111406-87-2      | -6.501 | -0.406 | -1.289 | -0.31  | -20.333 |
| Folic acid                       | 441.397  | 59-30-3          | -6.499 | -0.203 | -1.111 | -0.683 | -40.469 |

|                                               |          |                  |        |        |        |        |         |
|-----------------------------------------------|----------|------------------|--------|--------|--------|--------|---------|
| Deferasirox (Exjade)                          | 373.361  | 201530-41-8      | -6.482 | -0.232 | -0.743 | -0.626 | -34.917 |
| Diosmin                                       | 608.545  | 520-27-4         | -6.481 | -0.151 | -0.819 | -0.088 | -35.363 |
| spiramycin                                    | 843.053  | 8025-81-8        | -6.472 | -0.11  | -2.087 | 0      | -49.59  |
| Lomitapide                                    | 693.72   | 182431-12-5      | -6.472 | -0.129 | -2.329 | 0      | -55.594 |
| Streptomycin sulfate                          | 1457.384 | 3810-74-0        | -6.44  | -0.161 | -0.935 | -0.731 | -37.34  |
| Hesperidin                                    | 610.561  | 520-26-3         | -6.437 | -0.15  | -0.877 | -0.072 | -34.533 |
| Apigenin                                      | 270.237  | 520-36-5         | -6.433 | -0.322 | -1.103 | -0.659 | -20.641 |
| Cytarabine                                    | 243.217  | 147-94-4         | -6.428 | -0.378 | -0.491 | -0.602 | -20.909 |
| Fludarabine Phosphate (Fludara)               | 365.212  | 75607-67-9       | -6.425 | -0.268 | -0.339 | -0.411 | -29.855 |
| Arbutin (Uva, p-Arbutin)                      | 272.251  | 497-76-7         | -6.424 | -0.338 | -0.967 | -0.32  | -18.986 |
| R935788 (Fostamatinib disodium)               | 624.423  | 1025687-58-4     | -6.399 | -0.16  | -1.438 | -0.767 | -43.207 |
| Thiamine HCl (Vitamin B1)                     | 337.269  | 24539            | -6.396 | -0.355 | -0.851 | -0.999 | -26.041 |
| Ribostamycin Sulfate                          | 552.551  | 53797-35-6       | -6.394 | -0.206 | -1.024 | -0.99  | -30.343 |
| Cefoselis sulfate                             | 620.636  | 122841-12-7      | -6.376 | -0.182 | -0.755 | -1.038 | -46.003 |
| Aesculin (Esculin)                            | 340.282  | 531-75-9         | -6.371 | -0.265 | -1.514 | -0.082 | -29.695 |
| Labetalol HCl                                 | 364.866  | 32780-64-6       | -6.369 | -0.265 | -1.601 | -0.749 | -27.966 |
| Entecavir hydrate                             | 295.294  | 209216-23-9      | -6.361 | -0.318 | -1.073 | -0.637 | -26.379 |
| Sulfasalazine (Azulfidine)                    | 398.393  | 599-79-1         | -6.355 | -0.227 | -1.65  | -0.208 | -41.581 |
| Cefdinir (Omnicef)                            | 395.414  | 91832-40-5       | -6.352 | -0.244 | -0.867 | -0.53  | -37.601 |
| Ethacridine lactate monohydrate               | 361.392  | 6402-23-9        | -6.335 | -0.333 | -2.189 | -0.345 | -29.684 |
| Clevudine (Levovir)                           | 260.219  | 163252-36-6      | -6.324 | -0.351 | -0.925 | -0.434 | -24.409 |
| Raltitrexed (Tomudex)                         | 458.488  | 112887-68-0      | -6.323 | -0.198 | -1.54  | -0.16  | -43.814 |
| Dihydrostreptomycin sulfate                   | 1461.415 | 5490-27-7        | -6.321 | -0.158 | -0.532 | -0.768 | -28.8   |
| Thioguanine                                   | 167.192  | 154-42-7         | -6.313 | -0.574 | -0.259 | -0.548 | -22.361 |
| (+)-Catechin                                  | 290.268  | 154-23-4         | -6.312 | -0.301 | -1.162 | -0.403 | -26.291 |
| Ixazomib Citrate (MLN9708)                    | 517.122  | 1201902-80-8     | -6.307 | -0.186 | -1.022 | -0.425 | -44.84  |
| Daidzin                                       | 416.378  | 552-66-9         | -6.306 | -0.21  | -1.852 | -0.218 | -29.398 |
| Noradrenaline bitartrate monohydrate (Levoph) | 337.28   | 108341-18-0      | -6.295 | -0.525 | -0.906 | -0.65  | -14.806 |
| Naringin Dihydrochalcone (Naringin DC)        | 582.55   | 18916-17-1       | -6.288 | -0.153 | -0.755 | -0.452 | -26.086 |
| PD 0332991 (Palbociclib) Isethionate          | 573.664  | 827022-33-3, 571 | -6.279 | -0.19  | -1.879 | -0.369 | -46.648 |
| Vidarabine (Vira-A)                           | 267.241  | 5536-17-4        | -6.264 | -0.33  | -0.279 | -0.083 | -24.46  |
| Methoxsalen (Oxsoalolen)                      | 216.19   | 298-81-7         | -6.248 | -0.391 | -1.88  | -0.351 | -28.78  |
| Doripenem Hydrate                             | 438.52   | 364622-82-2      | -6.245 | -0.231 | -1.281 | -0.603 | -34.147 |
| Maltose                                       | 342.296  | 69-79-4          | -6.238 | -0.271 | -1.035 | -0.412 | -21.456 |
| Emodin                                        | 270.237  | 518-82-1         | -6.233 | -0.312 | -1.332 | -0.165 | -30.848 |

|                                     |                      |        |        |        |        |         |
|-------------------------------------|----------------------|--------|--------|--------|--------|---------|
| Orotic acid (6-Carboxyuracil)       | 156.096 65-86-1      | -6.232 | -0.567 | -0.323 | -0.26  | -17.835 |
| Ginsenoside Re                      | 947.154 52286-59-6   | -6.231 | -0.094 | -0.531 | -0.162 | -38.639 |
| Cytidine                            | 243.217 65-46-3      | -6.217 | -0.366 | -0.789 | -0.16  | -26.343 |
| Sofosbuvir(PSI-7977)                | 529.453 1190307-88-0 | -6.215 | -0.173 | -1.185 | -0.686 | -48.891 |
| 6-Mercaptopurine (6-MP) Monohydrate | 170.192 6112-76-1    | -6.212 | -0.621 | -0.226 | -0.521 | -21.159 |
| Lisinopril (Zestril)                | 405.488 83915-83-7   | -6.209 | -0.214 | -1.633 | -0.541 | -31.658 |
| Mercaptopurine (6-MP)               | 152.177 50-44-2      | -6.208 | -0.621 | -0.225 | -0.521 | -21.176 |
| Danthron                            | 240.211 117-10-2     | -6.202 | -0.345 | -1.292 | -0.152 | -28.285 |
| Piracetam                           | 142.156 7491-74-9    | -6.201 | -0.62  | -0.661 | -0.481 | -17.191 |
| Salicin (Salicoside, Salicine)      | 286.278 138-52-3     | -6.183 | -0.309 | -1.16  | -0.16  | -19.909 |
| Radotinib                           | 530.504 926037-48-1  | -6.182 | -0.159 | -2.338 | -0.32  | -52.443 |
| Hydralazine hydrochloride           | 196.637 304-20-1     | -6.173 | -0.514 | -1.02  | -0.355 | -20.782 |
| Montelukast Sodium                  | 608.165 151767-02-1  | -6.164 | -0.15  | -1.151 | -0.935 | -37.662 |
| Cefadroxil hydrate                  | 381.404 66592-87-8   | -6.163 | -0.247 | -1.056 | -0.146 | -34.154 |
| Cefixime                            | 453.45 79350-37-1    | -6.16  | -0.205 | -0.915 | -0.107 | -41.771 |
| Puromycin 2HCl                      | 544.431 58-58-2      | -6.158 | -0.181 | -0.636 | -0.236 | -40.543 |
| Atazanavir                          | 704.855 198904-31-3  | -6.156 | -0.121 | -2.101 | -0.608 | -50.39  |
| Adenosine (Adenocard)               | 267.241 58-61-7      | -6.144 | -0.323 | -0.604 | -0.413 | -25.29  |
| Eslicarbazepine Acetate             | 296.321 236395-14-5  | -6.137 | -0.279 | -1.56  | -0.41  | -30.18  |
| Carbidopa                           | 226.229 28860-95-9   | -6.134 | -0.383 | -0.377 | -0.354 | -14.569 |
| Trifluridine (Viroptic)             | 296.2 70-00-8        | -6.132 | -0.307 | -0.66  | -0.345 | -26.102 |
| Trimethoprim                        | 290.318 738-70-5     | -6.132 | -0.292 | -1.572 | -0.611 | -31.11  |
| Valganciclovir Hydrochloride        | 392.839 175865-59-5  | -6.127 | -0.245 | -0.419 | -0.715 | -37.704 |
| Cefcapene Pivoxil Hydrochloride     | 622.111 147816-24-8  | -6.117 | -0.161 | -0.481 | -1.13  | -36.911 |
| Nepafenac                           | 254.284 78281-72-8   | -6.102 | -0.321 | -0.713 | -1.179 | -28.57  |
| Scutellarin                         | 462.36 27740-01-8    | -6.102 | -0.185 | -1.421 | 0      | -34.886 |
| Lincomycin hydrochloride (Lincocin) | 442.998 859-18-7     | -6.097 | -0.226 | -0.79  | -0.64  | -21.891 |
| Allantoin                           | 158.115 97-59-6      | -6.091 | -0.554 | 0      | -0.616 | -20.944 |
| Pemetrexed                          | 471.374 150399-23-8  | -6.087 | -0.196 | -1.006 | -0.608 | -30.7   |
| Oclacitinib maleate                 | 453.513 1640292-55-2 | -6.086 | -0.265 | -1.375 | -0.738 | -30.471 |
| Usnic acid                          | 344.315 125-46-2     | -6.079 | -0.243 | -1.066 | -0.304 | -27.292 |
| Amikacin hydrate                    | 603.618 1257517-67-1 | -6.076 | -0.152 | -0.763 | -0.28  | -28.169 |
| Gemcitabine HCl (Gemzar)            | 299.659 122111-03-9  | -6.074 | -0.337 | -0.422 | -0.531 | -21.626 |
| Peficitinib (ASP015K, JNJ-54781532) | 326.393 944118-01-8  | -6.066 | -0.253 | -1.451 | -0.674 | -31.348 |
| Loganin                             | 390.382 18524-94-2   | -6.064 | -0.225 | -0.851 | -0.247 | -27.882 |

|                                     |         |             |        |        |        |        |         |
|-------------------------------------|---------|-------------|--------|--------|--------|--------|---------|
| Mebendazole                         | 295.293 | 31431-39-7  | -6.06  | -0.275 | -0.883 | -0.392 | -29.976 |
| Polydatin(Piceid)                   | 390.384 | 65914-17-2  | -6.057 | -0.216 | -0.706 | -0.617 | -24.762 |
| Clorsulon                           | 380.656 | 60200-06-8  | -6.054 | -0.303 | -1.059 | -0.946 | -27.985 |
| Equol                               | 242.27  | 531-95-3    | -6.053 | -0.336 | -1.543 | -0.515 | -27.06  |
| Epinastine HCl                      | 285.771 | 108929-04-0 | -6.051 | -0.318 | -1.459 | -0.387 | -28.123 |
| Zonisamide                          | 212.226 | 68291-97-4  | -6.048 | -0.432 | -0.987 | -0.288 | -23.049 |
| Paromomycin Sulfate                 | 713.707 | 1263-89-4   | -6.042 | -0.144 | -0.757 | -0.37  | -40.248 |
| Carzenide                           | 201.2   | 138-41-0    | -6.034 | -0.464 | -0.418 | -0.457 | -17.986 |
| Cefoperazone (Cefobid)              | 645.667 | 62893-19-0  | -6.027 | -0.137 | -0.628 | -0.586 | -54.097 |
| Diflunisal                          | 250.198 | 22494-42-4  | -6.019 | -0.334 | -1.118 | -0.2   | -23.224 |
| Aminophylline (Truphylline)         | 420.426 | 317-34-0    | -6.014 | -0.463 | -0.645 | -0.32  | -24.036 |
| Swertiamarin                        | 374.34  | 17388-39-5  | -6.013 | -0.231 | -0.772 | -0.312 | -25.677 |
| Dinitolmide (Zoalene)               | 225.158 | 148-01-6    | -6.011 | -0.376 | -0.657 | -0.16  | -25.508 |
| Eprosartan Mesylate                 | 520.618 | 144143-96-4 | -6.007 | -0.2   | -1.432 | -0.223 | -38.946 |
| Diosmetin (Luteolin 4-methyl ether) | 300.263 | 520-34-3    | -6.005 | -0.273 | -1.299 | -0.158 | -31.265 |
| Gastrodin (Gastrodine)              | 286.278 | 62499-27-8  | -6.004 | -0.3   | -1.236 | -0.32  | -21.318 |
| Azacitidine (Vidaza)                | 244.205 | 320-67-2    | -6.001 | -0.353 | -0.819 | -0.16  | -23.862 |
| Synephrine HCl                      | 203.666 | 5985-28-4   | -5.998 | -0.5   | -0.746 | -0.96  | -11.281 |
| Cefradine                           | 349.405 | 38821-53-3  | -5.996 | -0.25  | -1.448 | -0.63  | -40.235 |
| Uridine                             | 244.201 | 58-96-8     | -5.99  | -0.352 | -0.528 | -0.366 | -23.32  |
| Olmesartan medoxomil (Benicar)      | 558.585 | 144689-63-4 | -5.987 | -0.146 | -1.492 | -0.722 | -44.57  |
| Sorafenib                           | 464.825 | 284461-73-0 | -5.977 | -0.187 | -1.443 | -0.621 | -43.229 |
| Indole-3-carboxylic acid            | 161.157 | 771-50-6    | -5.966 | -0.497 | -0.846 | -0.281 | -20.763 |
| 4-Methylumbelliferone (4-MU)        | 176.169 | 90-33-5     | -5.956 | -0.458 | -0.449 | -0.456 | -15.393 |
| Lapatinib                           | 581.058 | 231277-92-2 | -5.954 | -0.149 | -2.115 | -0.14  | -49.929 |
| Azathioprine (Azasan, Imuran)       | 277.263 | 446-86-6    | -5.949 | -0.313 | -0.543 | -0.411 | -30.528 |
| Menadione                           | 172.18  | 58-27-5     | -5.94  | -0.457 | -1.263 | -0.32  | -24.178 |
| Glutathione                         | 307.323 | 70-18-8     | -5.937 | -0.297 | -0.333 | -0.99  | -24.5   |
| Brinzolamide                        | 383.507 | 138890-62-7 | -5.932 | -0.258 | -0.799 | -0.497 | -34.742 |
| Silodosin                           | 495.534 | 160970-54-7 | -5.932 | -0.169 | -1.277 | -0.701 | -38.592 |
| Sorafenib Tosylate                  | 637.027 | 475207-59-1 | -5.931 | -0.185 | -1.488 | -0.567 | -43.639 |
| Cabozantinib (XL184, BMS-907351)    | 501.506 | 849217-68-1 | -5.919 | -0.16  | -2.285 | -0.552 | -47.334 |
| Nalidixic acid (NegGram)            | 232.235 | 389-08-2    | -5.918 | -0.348 | -0.708 | -0.273 | -24.375 |
| Rosmarinic acid                     | 360.315 | 20283-92-5  | -5.915 | -0.227 | -1.189 | 0      | -31.902 |
| Geneticin (G418 Sulfate)            | 692.709 | 108321-42-2 | -5.914 | -0.174 | -0.621 | -0.573 | -29.156 |

|                                   |         |                  |        |        |        |        |         |
|-----------------------------------|---------|------------------|--------|--------|--------|--------|---------|
| Hematoxylin (Hydroxybrazilin)     | 302.279 | 517-28-2         | -5.909 | -0.269 | -1.199 | 0      | -30.328 |
| Sulfanilamide                     | 172.205 | 63-74-1          | -5.909 | -0.537 | -0.545 | -0.423 | -19.774 |
| Levetiracetam                     | 170.209 | 102767-28-2      | -5.902 | -0.492 | -0.813 | -0.16  | -20.651 |
| Saxagliptin hydrate               | 333.425 | 945667-22-1      | -5.896 | -0.256 | -1.323 | -0.657 | -29.913 |
| PD 0332991 (Palbociclib) HCl      | 483.994 | 827022-32-2, 571 | -5.895 | -0.179 | -1.1   | -0.682 | -41.33  |
| Pyridoxal 5-phosphate monohydrate | 265.157 | 41468-25-1       | -5.889 | -0.368 | -0.498 | -0.297 | -20.999 |
| Lapatinib (GW-572016) Ditosylate  | 925.461 | 388082-77-7      | -5.887 | -0.147 | -1.695 | -0.16  | -47.493 |
| Silibinin (Silybin)               | 482.436 | 22888-70-6       | -5.884 | -0.168 | -1.507 | -0.488 | -30.956 |
| 7-Aminocephalosporanic acid       | 272.278 | 957-68-6         | -5.884 | -0.327 | -0.732 | -0.503 | -29.531 |
| Daidzein                          | 254.238 | 486-66-8         | -5.881 | -0.31  | -1.458 | -0.399 | -27.276 |
| Avibactam sodium                  | 287.226 | 1192491-61-4     | -5.877 | -0.346 | -0.849 | -0.465 | -23.5   |
| Adrenalone HCl                    | 217.649 | 62-13-5          | -5.876 | -0.452 | -0.689 | -0.556 | -19.485 |
| Felbamate                         | 238.24  | 25451-15-4       | -5.874 | -0.346 | -1.308 | -0.475 | -26.447 |
| Amygdalin                         | 457.428 | 29883-15-6       | -5.87  | -0.183 | -0.996 | 0      | -28.742 |
| Suprofen (Profenal)               | 260.308 | 40828-46-4       | -5.866 | -0.326 | -1.792 | -0.239 | -27.3   |
| Fenoldopam (mesylate)             | 401.862 | 67227-57-0       | -5.863 | -0.279 | -1.116 | -0.3   | -28.527 |
| Proxyphylline                     | 238.243 | 603-00-9         | -5.862 | -0.345 | -0.519 | -0.403 | -27.977 |
| Bemegrade                         | 155.194 | 64-65-3          | -5.855 | -0.532 | -0.699 | -0.545 | -19.633 |
| Gemcitabine (Gemzar)              | 263.198 | 95058-81-4       | -5.852 | -0.325 | -0.312 | -0.516 | -21.973 |
| Isosorbide                        | 146.141 | 652-67-5         | -5.852 | -0.585 | -0.93  | -0.288 | -16.223 |
| Flubendazole (Flutelmium)         | 313.283 | 31430-15-6       | -5.846 | -0.254 | -1.15  | -0.396 | -33.548 |
| ODM-201                           | 398.846 | 1297538-32-9     | -5.845 | -0.209 | -1.61  | -0.432 | -37.512 |
| Flunixin meglumin                 | 491.458 | 42461-84-7       | -5.841 | -0.278 | -1.29  | -0.227 | -30.371 |
| Indirubin                         | 262.263 | 479-41-4         | -5.839 | -0.292 | -1.26  | -0.533 | -28.391 |
| Allopurinol Sodium (Aloprim)      | 159.101 | 17795-21-0       | -5.839 | -0.584 | -0.422 | -0.456 | -17.505 |
| Pomalidomide                      | 273.244 | 19171-19-8       | -5.835 | -0.292 | -0.672 | -0.514 | -32.458 |
| Daphnetin                         | 178.142 | 486-35-1         | -5.834 | -0.449 | -1.208 | 0      | -22.934 |
| Resiquimod                        | 314.382 | 144875-48-9      | -5.832 | -0.254 | -1.663 | -0.435 | -34.401 |
| Oxcarbazepine                     | 252.268 | 28721-07-5       | -5.831 | -0.307 | -1.182 | -0.16  | -28.851 |
| Oxaceprol                         | 173.167 | 33996-33-7       | -5.83  | -0.486 | -0.456 | -0.546 | -19.056 |
| Canagliflozin                     | 444.516 | 842133-18-0      | -5.826 | -0.188 | -0.946 | 0      | -32.884 |
| Natamycin                         | 665.725 | 7681-93-8        | -5.826 | -0.124 | -0.294 | -0.472 | -42.84  |
| Capecitabine (Xeloda)             | 359.35  | 154361-50-9      | -5.824 | -0.233 | -1.298 | 0      | -33.757 |
| phthalylsulfacetamide             | 362.357 | 131-69-1         | -5.823 | -0.233 | -1.016 | -0.309 | -34.18  |
| Flumazenil                        | 303.288 | 78755-81-4       | -5.822 | -0.265 | -1.222 | -0.32  | -32.015 |

|                                  |         |              |        |        |        |        |         |
|----------------------------------|---------|--------------|--------|--------|--------|--------|---------|
| Lactobionic acid                 | 358.296 | 96-82-2      | -5.821 | -0.243 | -1.222 | 0      | -20.751 |
| Niflumic acid                    | 282.218 | 4394-00-7    | -5.818 | -0.291 | -1.311 | -0.214 | -28.669 |
| AZD9291                          | 499.607 | 1421373-65-0 | -5.818 | -0.157 | -1.594 | -0.463 | -49.19  |
| (S)-crizotinib                   | 450.337 | 1374356-45-2 | -5.811 | -0.194 | -1.584 | -0.548 | -40.88  |
| Haloperidol (Haldol)             | 375.864 | 52-86-8      | -5.809 | -0.223 | -1.64  | -0.375 | -31.259 |
| Biapenem                         | 350.393 | 120410-24-4  | -5.797 | -0.242 | -1.01  | -0.165 | -35.164 |
| Protocatechuic acid              | 154.12  | 99-50-3      | -5.791 | -0.526 | -0.593 | -0.311 | -16.006 |
| Creatinine                       | 113.118 | 60-27-5      | -5.789 | -0.724 | -0.448 | -0.419 | -14.146 |
| Gimeracil                        | 145.544 | 103766-25-2  | -5.788 | -0.643 | -0.767 | -0.577 | -16.11  |
| Stavudine                        | 224.213 | 3056-17-5    | -5.783 | -0.361 | -0.572 | -0.292 | -22.856 |
| Berberine chloride               | 371.814 | 633-65-8     | -5.782 | -0.231 | -1.718 | 0      | -30.363 |
| Tobramycin                       | 467.514 | 32986-56-4   | -5.779 | -0.181 | -0.618 | -0.582 | -28.471 |
| Ginsenoside Rg1                  | 801.013 | 22427-39-0   | -5.779 | -0.103 | -0.727 | 0      | -46.209 |
| LDE225 (NVP-LDE225, Erismodegib) | 485.498 | 956697-53-3  | -5.778 | -0.165 | -1.625 | -0.396 | -43.493 |
| Methylene Blue                   | 319.852 | 61-73-4      | -5.777 | -0.289 | -1.735 | 0      | -28.687 |
| Adenine hydrochloride            | 171.588 | 2922-28-3    | -5.772 | -0.577 | -0.201 | -0.497 | -16.32  |
| Cephalexin (Cefalexin)           | 347.389 | 15686-71-2   | -5.769 | -0.24  | -1.432 | -0.321 | -39.818 |
| Argatroban                       | 508.634 | 74863-84-6   | -5.769 | -0.165 | -1.389 | -0.96  | -37.567 |
| Menbutone                        | 258.269 | 3562-99-0    | -5.767 | -0.304 | -1.618 | -0.304 | -27.753 |
| Salidroside (Rhodioloside)       | 300.304 | 10338-51-9   | -5.766 | -0.275 | -1.24  | -0.324 | -22.639 |
| Trigonelline Hydrochloride       | 173.597 | 6138-41-6    | -5.765 | -0.576 | -0.526 | -0.306 | -14.037 |
| Nordihydroguaiaretic acid        | 302.365 | 500-38-9     | -5.764 | -0.262 | -1.154 | 0      | -22.909 |
| Ribociclib (LEE011)              | 434.537 | 1211441-98-3 | -5.763 | -0.18  | -1.399 | -0.472 | -42.334 |
| Lifitegrast                      | 615.481 | 1025967-78-5 | -5.763 | -0.141 | -1.293 | -0.304 | -50.783 |
| Estradiol                        | 272.382 | 50-28-2      | -5.757 | -0.288 | -1.293 | -0.497 | -29.29  |
| Chlorothiazide                   | 295.723 | 58-94-6      | -5.755 | -0.339 | -0.963 | -0.435 | -24.324 |
| Nelarabine (Arranon)             | 297.267 | 121032-29-9  | -5.749 | -0.274 | -0.603 | -0.141 | -25.311 |
| Diminazene Aceturate             | 515.522 | 908-54-3     | -5.747 | -0.274 | -0.658 | -0.484 | -29.032 |
| (+,-)-Octopamine HCl             | 189.639 | 770-05-8     | -5.744 | -0.522 | -1.043 | -0.725 | -17.468 |
| VX-809 (Lumacaftor)              | 452.407 | 936727-05-8  | -5.744 | -0.174 | -1.128 | -0.501 | -37.083 |
| Eprodisate (disodium)            | 248.186 | 36589-58-9   | -5.739 | -0.522 | 0      | -0.881 | -7.659  |
| Bazedoxifene Acetate             | 530.655 | 198481-33-3  | -5.738 | -0.164 | -1.388 | -0.632 | -43.627 |
| Famotidine (Pepcid)              | 337.445 | 76824-35-6   | -5.734 | -0.287 | -0.461 | -0.757 | -33.811 |
| benzthiazide                     | 431.937 | 91-33-8      | -5.731 | -0.22  | -1.674 | -0.16  | -42.301 |
| Rufinamide (Banzel)              | 238.194 | 106308-44-5  | -5.73  | -0.337 | -0.462 | -0.793 | -25.148 |

|                                   |         |             |        |        |        |        |         |
|-----------------------------------|---------|-------------|--------|--------|--------|--------|---------|
| Mafenide Acetate                  | 246.283 | 13009-99-9  | -5.721 | -0.477 | -0.578 | -0.41  | -19.662 |
| Clindamycin phosphate             | 504.963 | 24729-96-2  | -5.72  | -0.185 | -0.945 | 0      | -35.153 |
| Tigecycline                       | 585.649 | 220620-09-7 | -5.717 | -0.136 | -1.141 | -0.194 | -48.78  |
| Prednisolone acetate (Omnipred)   | 402.481 | 52-21-1     | -5.716 | -0.197 | -0.979 | -0.456 | -38.954 |
| Teriflunomide                     | 270.207 | 108605-62-5 | -5.715 | -0.301 | -0.805 | -0.479 | -20.267 |
| Vanillin                          | 152.147 | 121-33-5    | -5.712 | -0.519 | -1.197 | -0.292 | -20.744 |
| Mitoxantrone 2HCl                 | 517.403 | 70476-82-3  | -5.711 | -0.178 | -0.974 | -0.751 | -38.232 |
| Mupirocin                         | 500.622 | 12650-69-0  | -5.71  | -0.163 | -1.684 | -0.277 | -39.8   |
| Hypoxanthine                      | 136.111 | 68-94-0     | -5.709 | -0.571 | -0.276 | -0.454 | -16.683 |
| Ademetionine disulfate tosylate   | 766.796 | 97540-22-2  | -5.708 | -0.211 | -0.501 | -0.671 | -26.593 |
| Furosemide (Lasix)                | 330.744 | 54-31-9     | -5.708 | -0.272 | -1.008 | -0.515 | -34.063 |
| Gallic acid                       | 170.12  | 149-91-7    | -5.707 | -0.476 | -0.808 | 0      | -20.388 |
| Quercitrin                        | 448.377 | 522-12-3    | -5.706 | -0.178 | -1.04  | 0      | -34.849 |
| Cladribine                        | 285.687 | 4291-63-8   | -5.704 | -0.3   | -0.156 | -0.329 | -27.27  |
| Chlorogenic acid                  | 354.309 | 327-97-9    | -5.7   | -0.228 | -0.373 | -0.32  | -32.559 |
| Ezetimibe (Zetia)                 | 409.425 | 163222-33-1 | -5.7   | -0.19  | -1.837 | -0.33  | -40.171 |
| Mesterolone                       | 304.467 | 1424-00-6   | -5.698 | -0.259 | -1.405 | -0.291 | -32.324 |
| Paclitaxel (Taxol)                | 853.906 | 33069-62-4  | -5.696 | -0.092 | -1.588 | -0.332 | -58.451 |
| Moxifloxacin hydrochloride        | 437.892 | 186826-86-8 | -5.693 | -0.196 | -1.594 | -0.608 | -34.997 |
| Cefaclor                          | 385.823 | 70356-03-5  | -5.693 | -0.237 | -1.421 | -0.324 | -39.969 |
| Tranexamic acid (Transamin)       | 157.21  | 1197-18-8   | -5.689 | -0.517 | -0.425 | -0.568 | -12.969 |
| Cinepazide maleate                | 533.571 | 26328-04-1  | -5.686 | -0.19  | -1.78  | -0.599 | -44.524 |
| Docetaxel (Taxotere)              | 807.879 | 114977-28-5 | -5.685 | -0.098 | -0.907 | -0.154 | -57.857 |
| Chromocarb                        | 190.152 | 4940-39-0   | -5.684 | -0.406 | -0.367 | -0.392 | -23.094 |
| Besifloxacin HCl (Besivance)      | 430.301 | 405165-61-9 | -5.683 | -0.21  | -1.234 | -0.501 | -41.214 |
| Proflavine Hemisulfate            | 516.572 | 1811-28-5   | -5.679 | -0.355 | -1.769 | -0.16  | -25.288 |
| Zaltoprofen                       | 298.356 | 74711-43-6  | -5.678 | -0.27  | -1.015 | -0.366 | -27.86  |
| Naringin (Naringoside)            | 580.535 | 10236-47-2  | -5.677 | -0.138 | -1.016 | -0.32  | -34.321 |
| Vilanterol Trifenatate            | 774.768 | 503070-58-4 | -5.675 | -0.177 | -2.464 | -0.152 | -43.523 |
| Estriol                           | 288.381 | 50-27-1     | -5.674 | -0.27  | -1.031 | -0.32  | -27.49  |
| Evista (Raloxifene Hydrochloride) | 510.044 | 82640-04-8  | -5.674 | -0.167 | -1.695 | -0.328 | -46.877 |
| Ethidium bromide                  | 394.308 | 1239-45-8   | -5.669 | -0.236 | -1.467 | -0.16  | -30.854 |
| Oxytetracycline (Terramycin)      | 460.434 | 79-57-2     | -5.668 | -0.172 | -0.995 | -0.194 | -37.872 |
| Saccharin                         | 183.185 | 29769       | -5.664 | -0.472 | -0.837 | -0.321 | -19.47  |
| Amiloride HCl                     | 266.088 | 2016-88-8   | -5.664 | -0.378 | -0.994 | -0.578 | -27.217 |



|                                       |         |              |        |        |        |        |         |
|---------------------------------------|---------|--------------|--------|--------|--------|--------|---------|
| Iopromide                             | 791.112 | 73334-07-3   | -5.663 | -0.177 | -0.395 | -0.563 | -35.126 |
| Cytisine                              | 190.242 | 485-35-8     | -5.662 | -0.404 | -1.145 | -0.376 | -23.721 |
| Pazopanib HCl                         | 473.979 | 635702-64-6  | -5.66  | -0.183 | -1.385 | -0.54  | -43.7   |
| 4-Aminoantipyrine                     | 203.24  | 30505        | -5.657 | -0.377 | -1.11  | -0.433 | -25.516 |
| Ethosuximide                          | 141.168 | 77-67-8      | -5.657 | -0.566 | -0.783 | -0.482 | -17.733 |
| Umbelliferone                         | 162.142 | 93-35-6      | -5.656 | -0.471 | -0.19  | -0.456 | -13.101 |
| Inulin                                | 342.296 | 9005-80-5    | -5.656 | -0.246 | -0.71  | 0      | -24.701 |
| Dolutegravir (GSK1349572)             | 419.379 | 1051375-16-6 | -5.656 | -0.189 | -1.458 | -0.16  | -40.38  |
| Methyldopa (Aldomet)                  | 211.215 | 555-30-6     | -5.655 | -0.377 | -0.84  | -0.209 | -19.646 |
| Tipiracil hydrochloride               | 279.123 | 183204-72-0  | -5.653 | -0.353 | -0.891 | -0.432 | -26.847 |
| piromidic acid                        | 288.302 | 19562-30-2   | -5.649 | -0.269 | -1.013 | -0.499 | -32.442 |
| Pyrogallol                            | 126.11  | 87-66-1      | -5.647 | -0.627 | -0.885 | 0      | -14.992 |
| Pyridoxine                            | 169.178 | 65-23-6      | -5.646 | -0.471 | -0.898 | -0.16  | -13.782 |
| Dyphylline (Dilor)                    | 254.243 | 479-18-5     | -5.646 | -0.314 | -0.469 | -0.334 | -29.008 |
| Trelagliptin                          | 357.382 | 865759-25-7  | -5.645 | -0.217 | -1.284 | -0.648 | -31.337 |
| Silymarin (Silybin B)                 | 482.436 | 65666-07-1   | -5.642 | -0.161 | -1.101 | -0.583 | -42.269 |
| Flufenamic acid                       | 281.23  | 530-78-9     | -5.641 | -0.282 | -1.248 | -0.143 | -25.507 |
| Lawsone                               | 174.153 | 83-72-7      | -5.639 | -0.434 | -0.785 | -0.21  | -24.157 |
| Sitagliptin phosphate monohydrate     | 523.324 | 654671-77-9  | -5.639 | -0.201 | -0.469 | -0.424 | -32.817 |
| Lonidamine                            | 321.158 | 50264-69-2   | -5.637 | -0.268 | -1.276 | -0.219 | -31.883 |
| Epinephrine bitartrate (Adrenalinium) | 333.291 | 51-42-3      | -5.636 | -0.434 | -0.955 | -0.48  | -15.147 |
| Isepamicin Sulphate                   | 667.682 | 67814-76-0   | -5.635 | -0.144 | -0.515 | -0.392 | -31.567 |
| Pazufloxacin mesylate                 | 414.405 | 163680-77-1  | -5.635 | -0.245 | -1.034 | -0.288 | -30.473 |
| Nadifloxacin                          | 360.379 | 124858-35-1  | -5.634 | -0.217 | -0.697 | -0.292 | -33.893 |
| Acetazolamide                         | 222.245 | 59-66-5      | -5.634 | -0.433 | -0.417 | -0.576 | -26.189 |
| Harmine hydrochloride                 | 248.708 | 343-27-1     | -5.632 | -0.352 | -1.265 | -0.346 | -22.868 |
| PTC124 (Ataluren)                     | 284.242 | 775304-57-9  | -5.63  | -0.268 | -1.13  | -0.287 | -28.557 |
| Tolcapone                             | 273.241 | 134308-13-7  | -5.63  | -0.282 | -0.95  | 0      | -24.937 |
| Baicalein                             | 270.237 | 491-67-8     | -5.629 | -0.281 | -1.315 | 0      | -29.488 |
| Carbamazepine (Carbatrol)             | 236.269 | 298-46-4     | -5.622 | -0.312 | -1.327 | -0.228 | -27.44  |
| Norethindrone (Norethisterone)        | 298.419 | 68-22-4      | -5.621 | -0.256 | -1.481 | -0.252 | -26.715 |
| Ethamsylate                           | 263.311 | 2624-44-4    | -5.621 | -0.468 | -0.267 | -0.242 | -15.64  |
| Ceftriaxone Sodium Trihydrate         | 598.544 | 104376-79-6  | -5.62  | -0.156 | -0.63  | -0.36  | -48.457 |
| Idoxuridin                            | 354.099 | 54-42-2      | -5.615 | -0.33  | -0.636 | -0.505 | -22.841 |
| Docetaxel Trihydrate                  | 861.925 | 148408-66-6  | -5.615 | -0.097 | -1.254 | -0.063 | -56.379 |

|                                   |         |              |        |        |        |        |         |
|-----------------------------------|---------|--------------|--------|--------|--------|--------|---------|
| Amoxicillin sodium (Amox)         | 387.386 | 34642-77-8   | -5.614 | -0.225 | -1.442 | -0.387 | -35.117 |
| Tolmetin                          | 257.284 | 26171-23-3   | -5.614 | -0.295 | -1.279 | -0.254 | -28.305 |
| Triapine                          | 195.245 | 236392-56-6  | -5.612 | -0.432 | -1.011 | -0.371 | -22.763 |
| Aminoglutethimide (Cytadren)      | 232.278 | 125-84-8     | -5.612 | -0.33  | -0.514 | -0.656 | -23.303 |
| Sotalol HCl                       | 308.825 | 959-24-0     | -5.61  | -0.312 | -1.46  | -0.43  | -27.408 |
| Indapamide (Lozol)                | 365.835 | 26807-65-8   | -5.608 | -0.234 | -1.221 | -0.238 | -36.256 |
| Prazosin HCl                      | 419.862 | 19237-84-4   | -5.608 | -0.2   | -1.232 | -0.323 | -38.861 |
| Pyridoxine hydrochloride          | 205.639 | 58-56-0      | -5.606 | -0.467 | -0.895 | -0.16  | -13.258 |
| L (+)-Rhamnose Monohydrate        | 182.172 | 10030-85-0   | -5.603 | -0.509 | -0.651 | 0      | -17.227 |
| L-Rhamnose monohydrate            | 182.172 | 6155-35-7    | -5.601 | -0.509 | -0.807 | 0      | -19.502 |
| Flucytosine (Ancobon)             | 129.092 | 2022-85-7    | -5.6   | -0.622 | -0.449 | -0.593 | -14.772 |
| Salicylic acid                    | 138.121 | 69-72-7      | -5.597 | -0.56  | -0.901 | -0.201 | -14.6   |
| Flumequine                        | 261.248 | 42835-25-6   | -5.595 | -0.294 | -0.714 | -0.204 | -24.981 |
| Abitrexate (Methotrexate)         | 454.439 | 21672        | -5.595 | -0.17  | -0.488 | -0.419 | -52.426 |
| Halobetasol Propionate            | 484.96  | 66852-54-8   | -5.592 | -0.169 | -2.001 | -0.318 | -36.464 |
| Albendazole Oxide (Ricobendazole) | 281.331 | 54029-12-8   | -5.591 | -0.294 | -1.393 | -0.094 | -28.447 |
| Posaconazole                      | 700.777 | 171228-49-2  | -5.591 | -0.11  | -1.389 | -0.2   | -61.631 |
| Cytosine                          | 111.102 | 71-30-7      | -5.591 | -0.699 | -0.452 | -0.593 | -14.254 |
| Clobetasol propionate             | 466.97  | 25122-46-7   | -5.59  | -0.175 | -1.997 | -0.354 | -34.704 |
| Methscopolamine (Pamine)          | 398.291 | 155-41-9     | -5.59  | -0.243 | -1.632 | 0      | -30.068 |
| Triamterene                       | 253.263 | 396-01-0     | -5.584 | -0.294 | -1.365 | -0.316 | -29.839 |
| Roxadustat (FG-4592)              | 352.341 | 808118-40-3  | -5.584 | -0.215 | -1.235 | -0.155 | -34.205 |
| Fludrocortisone acetate           | 422.487 | 514-36-3     | -5.584 | -0.186 | -0.948 | -0.45  | -37.888 |
| Pranoprofen                       | 255.269 | 52549-17-4   | -5.58  | -0.294 | -0.856 | -0.249 | -23.863 |
| ractopamine hydrochloride         | 337.841 | 90274-24-1   | -5.579 | -0.254 | -0.776 | -1.057 | -22.645 |
| CB-5083                           | 413.472 | 1542705-92-9 | -5.579 | -0.18  | -1.597 | -0.24  | -42.724 |
| isoetharine mesylate              | 335.416 | 7279-75-6    | -5.579 | -0.328 | -1.077 | -0.265 | -21.365 |
| Tamibarotene                      | 351.439 | 94497-51-5   | -5.577 | -0.215 | -1.196 | -0.152 | -35.058 |
| MK-4827(Niraparib)                | 320.388 | 1038915-60-4 | -5.576 | -0.232 | -1.411 | -0.425 | -34.785 |
| Floxuridine                       | 246.192 | 50-91-9      | -5.575 | -0.328 | -0.578 | -0.432 | -21.65  |
| Nebivolol HCl                     | 441.896 | 152520-56-4  | -5.575 | -0.192 | -1.453 | 0      | -33.276 |
| meticrane                         | 275.345 | 1084-65-7    | -5.574 | -0.328 | -1.002 | -0.16  | -26.284 |
| Enoxacin (Penetrex)               | 320.319 | 74011-58-8   | -5.573 | -0.242 | -0.896 | -0.152 | -28.171 |
| Dinoprostone                      | 352.465 | 363-24-6     | -5.573 | -0.223 | -1.236 | -0.66  | -23.886 |
| Trimebutine                       | 387.469 | 39133-31-8   | -5.573 | -0.199 | -1.995 | -0.486 | -38.079 |

|                                              |         |             |        |        |        |        |         |
|----------------------------------------------|---------|-------------|--------|--------|--------|--------|---------|
| Olaparib (AZD2281, Ku-0059436)               | 434.463 | 763113-22-0 | -5.572 | -0.174 | -1.488 | -0.654 | -42.097 |
| Harmine                                      | 212.247 | 442-51-3    | -5.569 | -0.348 | -1.229 | -0.315 | -23.907 |
| Scopoletin                                   | 192.168 | 92-61-5     | -5.564 | -0.397 | -1.706 | 0      | -24.189 |
| Imiquimod                                    | 240.304 | 99011-02-6  | -5.563 | -0.309 | -1.488 | -0.259 | -29.935 |
| Sulindac (Clinoril)                          | 356.411 | 38194-50-2  | -5.561 | -0.222 | -1.605 | -0.32  | -35.144 |
| Candesartan cilexetil (Atacand)              | 610.66  | 145040-37-5 | -5.558 | -0.124 | -2.117 | -0.16  | -49.841 |
| Bumetanide                                   | 364.416 | 28395-03-1  | -5.556 | -0.222 | -0.943 | -0.613 | -33.244 |
| Pazopanib                                    | 437.518 | 444731-52-6 | -5.555 | -0.179 | -1.533 | -0.553 | -41.841 |
| Valsartan (Diovan)                           | 435.519 | 137862-53-4 | -5.55  | -0.173 | -1.139 | -0.152 | -42.152 |
| Atipamezole hydrochloride                    | 248.751 | 104075-48-1 | -5.549 | -0.347 | -1.459 | -0.365 | -22.022 |
| Menadiol Diacetate                           | 258.269 | 573-20-6    | -5.547 | -0.292 | -1.25  | -0.515 | -29.732 |
| Resorcinol                                   | 110.111 | 108-46-3    | -5.546 | -0.693 | -0.902 | -0.456 | -14.375 |
| Mafenide hydrochloride                       | 222.692 | 138-37-4    | -5.546 | -0.462 | -0.51  | -0.304 | -22.444 |
| Palmatine                                    | 352.404 | 3486-67-7   | -5.545 | -0.213 | -1.329 | -0.209 | -32.333 |
| Itraconazole (Sporanox)                      | 705.633 | 84625-61-6  | -5.544 | -0.113 | -1.416 | 0      | -60.924 |
| Lumiracoxib (COX-189)                        | 293.721 | 220991-20-8 | -5.544 | -0.277 | -1.57  | -0.102 | -30.343 |
| Chlortetracycline HCl                        | 515.341 | 64-72-2     | -5.543 | -0.168 | -1.493 | -0.249 | -38.573 |
| L-Adrenaline (Epinephrine)                   | 183.204 | 51-43-4     | -5.54  | -0.426 | -0.954 | -0.426 | -16.583 |
| Ceftizoxime                                  | 383.403 | 68401-81-0  | -5.54  | -0.222 | -0.944 | -0.527 | -42.894 |
| Oxaliplatin (Eloxatin)                       | 397.286 | 61825-94-3  | -5.54  | -0.692 | -0.721 | -0.719 | -14.553 |
| Sulfathiazole                                | 255.317 | 72-14-0     | -5.539 | -0.346 | -0.918 | -0.429 | -27.298 |
| Fenofibric acid                              | 318.752 | 42017-89-0  | -5.538 | -0.252 | -1.967 | -0.216 | -31.999 |
| Pidotimod                                    | 244.268 | 121808-62-6 | -5.536 | -0.346 | -0.728 | -0.248 | -28.608 |
| Adenine sulfate                              | 368.332 | 321-30-2    | -5.536 | -0.554 | -0.122 | -0.346 | -19.88  |
| Tenofovir (Viread)                           | 287.212 | 147127-20-6 | -5.528 | -0.291 | -0.549 | -0.32  | -26.72  |
| Ciclopirox (Penlac)                          | 207.269 | 29342-05-0  | -5.527 | -0.368 | -1.532 | -0.301 | -26.131 |
| Tedizolid Phosphate                          | 450.318 | 856867-55-5 | -5.525 | -0.178 | -1.076 | 0      | -40.219 |
| tacrine hydrochlorid                         | 234.725 | 1684-40-8   | -5.518 | -0.368 | -1.72  | -0.117 | -25.553 |
| Avanafil                                     | 483.951 | 330784-47-9 | -5.516 | -0.162 | -1.161 | -0.833 | -40.955 |
| Prasugrel Hydrochloride                      | 409.902 | 389574-19-0 | -5.516 | -0.212 | -1.636 | -0.228 | -36.684 |
| Veratric acid                                | 182.173 | 34152       | -5.515 | -0.424 | -1.315 | -0.304 | -22.279 |
| Alosetron Hydrochloride                      | 330.812 | 122852-69-1 | -5.512 | -0.251 | -1.029 | -0.356 | -33.137 |
| Tacrine hydrochloride hydrate                | 198.264 | 206658-92-6 | -5.51  | -0.367 | -1.716 | -0.115 | -25.526 |
| Butylscopolamine bromide (Scopolamine butylb | 440.371 | 149-64-4    | -5.509 | -0.212 | -1.807 | 0      | -33.468 |
| Fumalic acid (Ferulic acid)                  | 194.184 | 1135-24-6   | -5.508 | -0.393 | -0.324 | -0.25  | -18.781 |

|                                        |          |               |        |        |        |        |         |
|----------------------------------------|----------|---------------|--------|--------|--------|--------|---------|
| spironolactone                         | 416.573  | 19000         | -5.508 | -0.19  | -1.263 | -0.506 | -37.398 |
| Ripasudil (K-115)                      | 395.877  | 887375-67-9   | -5.505 | -0.25  | -1.164 | -0.315 | -31.842 |
| Cyclo (-RGDfK)                         | 717.694  | 161552-03-0   | -5.503 | -0.128 | -0.745 | -0.778 | -46.452 |
| Fosaprepitant dimeglumine salt         | 1004.834 | 265121-04-8   | -5.503 | -0.134 | -0.574 | -0.255 | -46.391 |
| Succinylsulfathiazole                  | 355.389  | 116-43-8      | -5.502 | -0.239 | -0.691 | -0.185 | -33.466 |
| Indobufen                              | 295.332  | 63610-08-2    | -5.502 | -0.25  | -1.582 | -0.157 | -33.174 |
| Alizapride hydrochloride               | 351.831  | 59338-87-3    | -5.5   | -0.239 | -0.982 | -0.498 | -29.493 |
| Esculetin                              | 178.142  | 305-01-1      | -5.498 | -0.423 | -0.329 | -0.288 | -15.939 |
| Nitroxoline                            | 190.156  | 4008-48-4     | -5.497 | -0.393 | -0.837 | -0.16  | -23.754 |
| Norfloxacin (Norxacin)                 | 319.331  | 70458-96-7    | -5.495 | -0.239 | -0.967 | -0.152 | -29.833 |
| Prasugrel (Effient)                    | 373.441  | 150322-43-3   | -5.494 | -0.211 | -1.62  | -0.226 | -36.747 |
| Ganciclovir                            | 255.231  | 82410-32-0    | -5.49  | -0.305 | -0.414 | -0.432 | -24.519 |
| Amodiaquin (dihydrochloride dihydrate) | 464.814  | 6398-98-7     | -5.489 | -0.22  | -1.763 | -0.436 | -35.275 |
| Ribavirin (Copegus)                    | 244.205  | 36791-04-5    | -5.486 | -0.323 | -0.07  | -0.343 | -23.332 |
| Sodium Monofluorophosphate             | 143.95   |               |        |        |        |        |         |
| Amonafide                              | 283.325  | 69408-81-7    | -5.485 | -0.261 | -1.002 | -0.317 | -31.607 |
| Metolazone (Zaroxolyn)                 | 365.835  | 17560-51-9    | -5.485 | -0.229 | -1.222 | -0.272 | -35.164 |
| MK-4827(Niraparib) tosylate            | 492.59   | 1038915-73-9  | -5.485 | -0.229 | -1.392 | -0.361 | -34.836 |
| Ampicillin Trihydrate                  | 403.451  | 7177-48-2     | -5.482 | -0.228 | -0.871 | -0.429 | -36.524 |
| Oxiracetam                             | 158.155  | 62613-82-5    | -5.479 | -0.498 | -0.689 | -0.557 | -21.128 |
| Dicoumarol                             | 336.295  | 66-76-2       | -5.479 | -0.219 | -1.924 | -0.308 | -38.466 |
| Methyclothiazide                       | 360.237  | 135-07-9      | -5.477 | -0.274 | -0.543 | -0.16  | -34.213 |
| Ibandronate sodium                     | 360.234  | 138926-19-9   | -5.476 | -0.288 | -0.908 | 0      | -20.652 |
| E7080 (Lenvatinib)                     | 426.853  | 417716-92-8   | -5.47  | -0.182 | -1.643 | -0.379 | -43.559 |
| Sulfisoxazole                          | 267.304  | 127-69-5      | -5.47  | -0.304 | -1.056 | -0.308 | -23.936 |
| Hexachlorophene                        | 406.904  | 70-30-4       | -5.468 | -0.26  | -1.872 | -0.304 | -40.647 |
| Diazoxide                              | 230.671  | 364-98-7      | -5.466 | -0.39  | -1.453 | -0.004 | -28.802 |
| Naftopidil (Flivas)                    | 392.491  | 57149-07-2    | -5.465 | -0.188 | -1.216 | -0.715 | -31.909 |
| Sodium salicylate                      | 161.111  | 54-21-7       | -5.464 | -0.546 | -1.081 | -0.09  | -15.727 |
| LX1606 hippurate                       | 754.155  | 11137608-69-5 | -5.463 | -0.137 | -1.399 | -0.546 | -47.621 |
| Terazosin HCl                          | 423.894  | 63074-08-8    | -5.462 | -0.195 | -1.648 | -0.42  | -39.935 |
| Pentamidine isethionate                | 592.683  | 140-64-7      | -5.462 | -0.218 | -1.062 | -0.382 | -32.289 |
| Balofloxacin                           | 389.421  | 127294-70-6   | -5.46  | -0.195 | -0.556 | -0.307 | -31.625 |
| Atipamezole                            | 212.29   | 104054-27-5   | -5.458 | -0.341 | -1.39  | -0.363 | -21.932 |
| Cefditoren pivoxil                     | 620.721  | 117467-28-4   | -5.456 | -0.133 | -1.029 | -0.195 | -59.081 |

|                                |          |              |        |        |        |        |         |
|--------------------------------|----------|--------------|--------|--------|--------|--------|---------|
| L-5-Hydroxytryptophan          | 220.225  | 895096       | -5.455 | -0.341 | -1.145 | -0.327 | -26.072 |
| Salbutamol sulfate (Albuterol) | 337.389  | 51022-70-9   | -5.452 | -0.321 | -1.225 | -0.559 | -19.669 |
| Potassium Canrenoate           | 396.562  | 102731       | -5.452 | -0.21  | -1.774 | -0.413 | -26.082 |
| Deferiprone                    | 139.152  | 30652-11-0   | -5.452 | -0.545 | -1.057 | -0.214 | -17.92  |
| pasiniazid                     | 290.275  | 2066-89-9    | -5.451 | -0.496 | -0.787 | -0.288 | -16.366 |
| Sophoridine                    | 248.364  | 6882-68-4    | -5.45  | -0.303 | -1.147 | -0.252 | -29.146 |
| Naftopidil Dihydrochloride     | 465.413  | 57149-08-3   | -5.45  | -0.188 | -1.274 | -0.719 | -32.443 |
| Ramosetron Hydrochloride       | 315.797  | 132907-72-3  | -5.45  | -0.26  | -1.233 | -0.286 | -28.167 |
| Propylthiouracil               | 170.232  | 51-52-5      | -5.446 | -0.495 | -0.618 | -0.291 | -23.326 |
| Cabozantinib malate            | 635.593  | 1140909-48-3 | -5.445 | -0.147 | -1.855 | -0.506 | -45.186 |
| Caffeic acid                   | 180.157  | 331-39-5     | -5.44  | -0.418 | -0.275 | -0.143 | -14.209 |
| Fasudil HCl (HA-1077)          | 327.83   | 105628-07-7  | -5.439 | -0.272 | -1.184 | -0.241 | -30.871 |
| Sisomicin sulfate              | 1385.445 | 53179-09-2   | -5.437 | -0.175 | -1.075 | -0.948 | -28.542 |
| D-Galactose                    | 180.156  | 59-23-4      | -5.435 | -0.453 | -0.263 | -0.16  | -14.339 |
| cinoxacin                      | 262.218  | 28657-80-9   | -5.434 | -0.286 | -0.73  | -0.702 | -29.118 |
| Paeonol (Peonol)               | 166.174  | 552-41-0     | -5.434 | -0.453 | -0.909 | -0.175 | -19.711 |
| Lactulose                      | 342.296  | 4618-18-2    | -5.431 | -0.236 | -0.438 | 0      | -21.712 |
| R788 (Fostamatinib)            | 580.46   | 901119-35-5  | -5.428 | -0.136 | -0.872 | -0.011 | -50.551 |
| Erythromycin Ethylsuccinate    | 862.053  | 1264-62-6    | -5.428 | -0.09  | -1.295 | -0.119 | -50.041 |
| ethoxzolamide                  | 258.317  | 452-35-7     | -5.427 | -0.339 | -0.801 | -0.28  | -24.965 |
| metaproterenol sulfate         | 520.594  | 5874-97-5    | -5.426 | -0.362 | -0.809 | -0.8   | -19.92  |
| Zalcitabine                    | 211.218  | 7481-89-2    | -5.423 | -0.362 | -0.218 | -0.546 | -23.977 |
| Mesalamine (Lialda)            | 153.135  | 89-57-6      | -5.423 | -0.493 | -0.569 | -0.475 | -18.036 |
| Tolfenamic acid                | 261.704  | 13710-19-5   | -5.421 | -0.301 | -1.266 | -0.187 | -28.958 |
| Tranilast (SB 252218)          | 327.331  | 53902-12-8   |        |        |        |        |         |
| Cabazitaxel (Jevtana)          | 835.932  | 183133-96-2  | -5.42  | -0.09  | -1.35  | 0      | -60.138 |
| Triflusal                      | 248.155  | 322-79-2     | -5.415 | -0.319 | -1     | -0.092 | -22.198 |
| Chloroxine                     | 214.048  | 773-76-2     | -5.415 | -0.417 | -1.272 | -0.32  | -23.554 |
| Methandrostenolone             | 300.435  | 72-63-9      | -5.414 | -0.246 | -1.062 | -0.296 | -31.067 |
| Zanamivir (Relenza)            | 332.31   | 139110-80-8  | -5.413 | -0.235 | -0.376 | -0.402 | -27.466 |
| 4-Hydroxybenzoic acid          | 138.121  | 99-96-7      | -5.412 | -0.541 | -0.741 | -0.392 | -14.476 |
| Methylthiouracil               | 142.179  | 20547        | -5.412 | -0.601 | -0.745 | -0.16  | -22.391 |
| Isoporsalen                    | 186.164  | 523-50-2     | -5.41  | -0.386 | -1.603 | -0.171 | -24.997 |
| Tanshinone I                   | 276.286  | 568-73-0     | -5.41  | -0.258 | -1.463 | -0.01  | -31.067 |
| Regorafenib (BAY 73-4506)      | 482.815  | 755037-03-7  | -5.409 | -0.164 | -1.316 | -0.304 | -41.08  |

|                                      |         |              |        |        |        |        |         |
|--------------------------------------|---------|--------------|--------|--------|--------|--------|---------|
| Dehydrocholic acid                   | 402.524 | 81-23-2      | -5.409 | -0.187 | -1.28  | -0.531 | -29.326 |
| Paliperidone                         | 426.484 | 144598-75-4  | -5.407 | -0.174 | -1.097 | -0.407 | -40.139 |
| Doxofylline                          | 266.253 | 69975-86-6   | -5.406 | -0.285 | -0.715 | -0.267 | -30.667 |
| Pranlukast                           | 481.503 | 103177-37-3  | -5.405 | -0.15  | -2.133 | -0.299 | -53.218 |
| Isoniazid (Tubizid)                  | 137.139 | 54-85-3      | -5.405 | -0.54  | -0.65  | -0.529 | -19.619 |
| Bergapten                            | 216.19  | 484-20-8     | -5.399 | -0.337 | -1.607 | -0.233 | -27.96  |
| Allopurinol (Zyloprim)               | 136.111 | 315-30-0     | -5.399 | -0.54  | -0.523 | -0.16  | -20.901 |
| Benzenesulfonamide                   | 157.19  | 36070        | -5.397 | -0.54  | -0.483 | -0.456 | -15.878 |
| Psoralen                             | 186.164 | 66-97-7      | -5.395 | -0.385 | -1.304 | -0.201 | -23.737 |
| Nilutamide                           | 317.221 | 63612-50-0   | -5.394 | -0.245 | -0.976 | -0.32  | -34.844 |
| Milrinone (Primacor)                 | 211.219 | 78415-72-2   | -5.39  | -0.337 | -1.294 | -0.272 | -26     |
| Fludarabine (Fludara)                | 285.232 | 21679-14-1   | -5.389 | -0.269 | -0.513 | -0.288 | -24.344 |
| Rebamipide                           | 370.786 | 90098-04-7   | -5.389 | -0.207 | -1.396 | -0.352 | -37.721 |
| Palmatine chloride                   | 387.857 | 10605-02-4   | -5.387 | -0.207 | -1.217 | -0.32  | -31.674 |
| Ronidazole                           | 200.152 | 7681-76-7    | -5.385 | -0.385 | -0.378 | -0.289 | -21.493 |
| Danofloxacin Mesylate                | 453.484 | 119478-55-6  | -5.385 | -0.207 | -0.824 | -0.2   | -31.404 |
| Retigabine                           | 303.331 | 150812-12-7  | -5.384 | -0.245 | -1.912 | -0.618 | -32.39  |
| Ketorolac                            | 255.269 | 74103-07-4   | -5.383 | -0.283 | -1.169 | 0      | -30.475 |
| Sulfaguanidine                       | 214.245 | 57-67-0      | -5.38  | -0.384 | -0.626 | -0.768 | -21.34  |
| Piroxicam (Feldene)                  | 331.346 | 36322-90-4   | -5.379 | -0.234 | -0.857 | -0.245 | -34.955 |
| Niacin (Nicotinic acid)              | 123.109 | 59-67-6      | -5.378 | -0.598 | -0.549 | -0.274 | -16.089 |
| Alpelisib (BYL719)                   | 441.47  | 1217486-61-7 | -5.378 | -0.179 | -1.03  | -0.544 | -33.829 |
| Oxfendazole                          | 315.347 | 53716-50-0   | -5.378 | -0.244 | -1.343 | -0.16  | -30.06  |
| Sulfachloropyridazine                | 284.722 | 80-32-0      | -5.377 | -0.299 | -0.918 | -0.31  | -24.496 |
| Cefepime Dihydrochloride Monohydrate | 571.498 | 123171-59-5  | -5.376 | -0.168 | -1.096 | -0.529 | -37.193 |
| anisindione                          | 252.265 | 117-37-3     | -5.374 | -0.283 | -1.743 | -0.027 | -28.849 |
| Mefloquine HCl                       | 414.773 | 51773-92-3   | -5.373 | -0.207 | -1.125 | -0.16  | -28.621 |
| Benzoic acid                         | 122.121 | 65-85-0      | -5.372 | -0.597 | -0.563 | -0.288 | -15.423 |
| anisotropine methylbromide           | 362.345 | 80-50-2      | -5.371 | -0.269 | -2.049 | -0.32  | -22.99  |
| Geniposide                           | 388.366 | 24512-63-8   | -5.371 | -0.199 | -0.686 | -0.311 | -33.317 |
| Phenindione (Rectadione)             | 222.239 | 30655        | -5.37  | -0.316 | -1.897 | 0      | -27.896 |
| Bithionol                            | 356.052 | 97-18-7      | -5.368 | -0.283 | -1.643 | -0.304 | -33.192 |
| Edaravone (MCI-186)                  | 174.199 | 89-25-8      | -5.367 | -0.413 | -0.886 | -0.257 | -21.579 |
| L(+)-Arabinose                       | 150.13  | 87-72-9      | -5.364 | -0.536 | -0.567 | 0      | -17.464 |
| Enalapril maleate (Vasotec)          | 492.519 | 76095-16-4   | -5.363 | -0.199 | -1.434 | -0.304 | -37.322 |

|                                       |         |              |        |        |        |        |         |
|---------------------------------------|---------|--------------|--------|--------|--------|--------|---------|
| Teniposide (Vumon)                    | 656.654 | 29767-20-2   | -5.363 | -0.117 | -1.189 | 0      | -49.789 |
| Marimastat (BB-2516)                  | 331.408 | 154039-60-8  | -5.361 | -0.233 | -0.565 | -0.605 | -29.153 |
| Levonorgestrel (Levonelle)            | 312.446 | 797-63-7     | -5.36  | -0.233 | -1.326 | -0.377 | -20.429 |
| Fenbendazole (Panacur)                | 299.348 | 43210-67-9   | -5.358 | -0.255 | -1.245 | -0.16  | -29.299 |
| Carprofen                             | 273.714 | 53716-49-7   | -5.352 | -0.282 | -0.899 | -0.225 | -23.586 |
| Kitasamycin                           | 785.958 | 1392-21-8    | -5.352 | -0.097 | -1.906 | 0      | -49.503 |
| Sodium Danshensu                      | 220.155 | 67920-52-9   | -5.351 | -0.382 | -1.057 | -0.14  | -17.309 |
| TriacetonaMine                        | 155.237 | 826-36-8     | -5.351 | -0.486 | -1.047 | -0.226 | -21.548 |
| VX-661                                | 520.498 | 1152311-62-0 | -5.35  | -0.145 | -1.121 | -0.478 | -39.116 |
| Acotiamide hydrochloride              | 541.058 | 773092-05-0  | -5.35  | -0.173 | -1.395 | -0.563 | -43.397 |
| Amikacin disulfate                    | 781.759 | 39831-55-5   | -5.349 | -0.134 | -0.486 | -0.585 | -29.804 |
| Indomethacin (Indocid, Indocin)       | 357.788 | 53-86-1      | -5.342 | -0.214 | -1.845 | -0.213 | -39.047 |
| Nicotinamide (Vitamin B3)             | 122.125 | 98-92-0      | -5.342 | -0.594 | -0.629 | -0.329 | -17.074 |
| Flopropione                           | 182.173 | 2295-58-1    | -5.341 | -0.411 | -0.853 | -0.304 | -19.493 |
| Amiloride hydrochloride dihydrate     | 302.119 | 17440-83-4   | -5.339 | -0.356 | -0.643 | -0.606 | -27.255 |
| Retigabine 2HCl                       | 376.253 | 150812-13-8  | -5.338 | -0.243 | -1.583 | -0.536 | -35.57  |
| Exemestane                            | 296.403 | 107868-30-4  | -5.336 | -0.243 | -1.163 | -0.32  | -31.748 |
| Levofloxacin hydrate                  | 361.368 | 138199-71-0  | -5.33  | -0.205 | -0.853 | -0.225 | -29.736 |
| Isatin                                | 147.131 | 91-56-5      | -5.328 | -0.484 | -0.614 | -0.204 | -21.826 |
| Epinephrine HCl (Adrenaline)          | 219.665 | 55-31-2      | -5.328 | -0.41  | -0.775 | -0.288 | -17.517 |
| Flavone                               | 222.239 | 525-82-6     | -5.325 | -0.313 | -1.966 | -0.169 | -28.889 |
| (R)-baclofen                          | 213.661 | 69308-37-8   | -5.325 | -0.38  | -0.723 | -0.376 | -18.503 |
| Sasapyrine                            | 258.226 | 552-94-3     | -5.324 | -0.28  | -1.042 | 0      | -26.225 |
| Ranolazine (Ranexa)                   | 427.537 | 95635-55-5   | -5.321 | -0.172 | -1.356 | -0.658 | -38.008 |
| Terbutaline Sulfate                   | 548.647 | 23031-32-5   | -5.32  | -0.333 | -1.444 | -0.529 | -22.607 |
| Faropenem Sodium                      | 307.298 | 122547-49-3  | -5.313 | -0.28  | -1.083 | -0.165 | -29.683 |
| Sarafloxacin HCl                      | 421.825 | 91296-87-6   | -5.313 | -0.19  | -0.946 | -0.301 | -37.318 |
| Telbivudine (Sebivo, Tyzeka)          | 242.229 | 3424-98-4    | -5.311 | -0.312 | -0.577 | -0.316 | -22.644 |
| Voglibose                             | 267.276 | 83480-29-9   | -5.311 | -0.295 | -0.265 | -0.071 | -16.145 |
| Nefiracetam (Translon)                | 246.305 | 77191-36-7   | -5.311 | -0.295 | -1.403 | -0.32  | -27.858 |
| Fulvestrant (Faslodex)                | 606.771 | 129453-61-8  | -5.31  | -0.13  | -2.261 | -0.186 | -42.894 |
| Quinine hydrochloride dihydrate       | 396.908 | 6119-47-7    | -5.308 | -0.221 | -1.467 | -0.549 | -32.64  |
| Tioxolone                             | 168.17  | 4991-65-5    | -5.307 | -0.482 | -0.91  | -0.332 | -21.716 |
| Lomefloxacin hydrochloride (Maxaquin) | 387.809 | 98079-52-8   | -5.307 | -0.212 | -0.943 | -0.152 | -31.868 |
| Altretamine (Hexalen)                 | 210.279 | 645-05-6     | -5.306 | -0.354 | -0.634 | 0      | -24.443 |

|                                                |         |              |        |        |        |        |         |
|------------------------------------------------|---------|--------------|--------|--------|--------|--------|---------|
| Diclofenac Potassium                           | 334.239 | 15307-81-0   | -5.305 | -0.279 | -1.449 | -0.32  | -25.946 |
| Citolone                                       | 159.206 | 1195-16-0    | -5.303 | -0.53  | -0.567 | -0.282 | -21.94  |
| CAL-101 (GS-1101)                              | 415.423 | 870281-82-6  | -5.303 | -0.171 | -1.563 | -0.36  | -42.044 |
| Omeprazole (Prilosec)                          | 345.416 | 73590-58-6   | -5.3   | -0.221 | -1.017 | -0.16  | -29.783 |
| Acesulfame Potassium                           | 202.25  | 55589-62-3   | -5.296 | -0.53  | -0.371 | -0.32  | -20.745 |
| Forsythine                                     | 534.552 | 487-41-2     | -5.295 | -0.139 | -1.362 | -0.127 | -34.215 |
| Lamivudine (Epivir)                            | 229.256 | 134678-17-4  | -5.295 | -0.353 | -0.325 | -0.456 | -23.882 |
| Nevirapine (Viramune)                          | 266.298 | 129618-40-2  | -5.295 | -0.265 | -1.434 | -0.32  | -27.015 |
| D-Cycloserine                                  | 102.092 | 68-41-7      | -5.294 | -0.756 | -0.408 | -0.44  | -12.326 |
| Puerarin (Kakonein)                            | 432.378 | 3681-99-0    | -5.292 | -0.171 | -1.122 | -0.29  | -32.624 |
| Sulfaphenazole                                 | 314.362 | 526-08-9     | -5.29  | -0.24  | -1.272 | -0.347 | -34.817 |
| D-Phenylalanine                                | 165.189 | 673-06-3     | -5.29  | -0.441 | -1.168 | -0.378 | -18.723 |
| Bortezomib (Velcade)                           | 384.237 | 179324-69-7  | -5.286 | -0.189 | -1.152 | -0.31  | -34.288 |
| Curcumin                                       | 368.38  | 458-37-7     | -5.284 | -0.196 | -1.42  | -0.356 | -39.502 |
| Baicalin                                       | 446.361 | 21967-41-9   | -5.282 | -0.165 | -0.409 | 0      | -30.226 |
| metaraminol bitartrate                         | 317.292 | 33402-03-8   | -5.282 | -0.44  | -0.609 | -0.629 | -18.799 |
| Piribedil                                      | 298.34  | 622744       | -5.277 | -0.24  | -2.037 | -0.2   | -35.081 |
| Trospium chloride (Sanctura)                   | 427.964 | 10405-02-4   | -5.275 | -0.182 | -1.451 | -0.204 | -33.095 |
| Tyramine                                       | 137.179 | 51-67-2      | -5.272 | -0.527 | -0.757 | -0.576 | -11.842 |
| Topiroxostat                                   | 248.243 | 577778-58-6  | -5.272 | -0.277 | -0.726 | -0.385 | -30.873 |
| Taurolidine                                    | 284.356 | 19388-87-5   | -5.267 | -0.31  | -0.339 | -0.456 | -28.769 |
| Anagrelide hydrochloride                       | 292.549 | 58579-51-4   | -5.267 | -0.329 | -0.856 | -0.412 | -27.819 |
| Sulfogaiacol                                   | 242.291 | 1321-14-8    | -5.266 | -0.405 | -1.008 | -0.306 | -18.833 |
| Risedronate sodium                             | 305.094 | 115436-72-1  | -5.262 | -0.31  | -0.274 | -0.453 | -17.173 |
| Abacavir sulfate                               | 670.743 | 188062-50-2  | -5.262 | -0.251 | -1.035 | -0.479 | -31.445 |
| Elvitegravir (GS-9137)                         | 447.884 | 697761-98-1  | -5.262 | -0.17  | -1.333 | -0.153 | -42.882 |
| Chloramphenicol (Chloromycetin)                | 323.129 | 56-75-7      | -5.262 | -0.263 | -0.655 | -0.304 | -29.558 |
| Aceclidine HCl                                 | 205.682 | 6109-70-2    | -5.261 | -0.438 | -1.21  | -0.208 | -20.824 |
| Epiandrosterone (Δ <sup>3</sup> -androsterone) | 290.44  | 481-29-8     | -5.259 | -0.25  | -1.279 | -0.32  | -30.654 |
| Daunorubicin HCl (Daunomycin HCl)              | 563.981 | 23541-50-6   | -5.259 | -0.138 | -0.853 | -0.41  | -34.727 |
| Atovaquone (Atavaquone)                        | 366.837 | 95233-18-4   | -5.256 | -0.202 | -1.338 | -0.431 | -36.769 |
| Baricitinib (LY3009104)                        | 371.417 | 1187594-09-7 | -5.254 | -0.202 | -0.82  | -0.506 | -38.737 |
| Brivudine                                      | 333.135 | 69304-47-8   | -5.254 | -0.277 | -1.289 | -0.238 | -31.269 |
| Aceclidine Hydrochloride                       | 205.682 | 56715-13-0   | -5.253 | -0.438 | -1.19  | -0.232 | -20.556 |
| Loxoprofen                                     | 246.302 | 68767-14-6   | -5.253 | -0.292 | -1.353 | -0.124 | -20.962 |



|                                      |                      |        |        |        |        |         |
|--------------------------------------|----------------------|--------|--------|--------|--------|---------|
| Brimonidine Tartrate                 | 442.221 70359-46-5   | -5.25  | -0.309 | -1.164 | -0.298 | -27.189 |
| Ampicillin sodium                    | 371.387 69-52-3      | -5.247 | -0.219 | -0.888 | -0.329 | -31.471 |
| Ibudilast                            | 230.306 50847-11-5   | -5.247 | -0.309 | -1.108 | -0.244 | -26.18  |
| Irbesartan (Avapro)                  | 428.529 138402-11-6  | -5.246 | -0.164 | -1.406 | -0.16  | -44.648 |
| Cefmenoxime hydrochloride            | 1059.578 75738-58-8  | -5.246 | -0.159 | -0.765 | -0.532 | -50.674 |
| Osalmid                              | 229.231 526-18-1     | -5.246 | -0.309 | -1.212 | -0.304 | -24.926 |
| Medroxyprogesterone                  | 344.488 520-85-4     | -5.245 | -0.21  | -1.44  | 0      | -36.346 |
| Dipyridamole (Persantine)            | 504.626 58-32-2      | -5.244 | -0.146 | -0.619 | -0.804 | -42.514 |
| Acalabrutinib (ACP-196)              | 465.507 1420477-60-6 | -5.244 | -0.15  | -1.861 | -0.224 | -48.201 |
| Indacaterol Maleate                  | 508.563 753498-25-8  | -5.235 | -0.181 | -1.064 | -0.649 | -32.897 |
| Carteolol HCl                        | 328.834 51781-21-6   | -5.235 | -0.249 | -0.903 | -0.487 | -27.553 |
| Tegafur (FT-207, NSC 148958)         | 200.167 17902-23-7   | -5.235 | -0.374 | -0.694 | -0.16  | -24.925 |
| Cefuroxime axetil                    | 510.474 64544-07-6   | -5.235 | -0.15  | -0.875 | -0.754 | -47.37  |
| Benzbromarone                        | 424.083 3562-84-3    | -5.234 | -0.238 | -1.551 | -0.439 | -37.083 |
| Melatonin                            | 232.278 73-31-4      | -5.233 | -0.308 | -1.247 | -0.427 | -30.473 |
| Istradefylline (KW-6002)             | 384.429 155270-99-8  | -5.23  | -0.187 | -0.523 | -0.191 | -39.764 |
| Etoricoxib                           | 358.842 202409-33-4  | -5.228 | -0.218 | -1.476 | -0.32  | -34.791 |
| Dofetilide (Tikosyn)                 | 441.565 115256-11-6  | -5.228 | -0.18  | -1.482 | -0.233 | -40.51  |
| Doxorubicin (Adriamycin) HCl         | 579.98 25316-40-9    | -5.227 | -0.134 | -0.545 | -0.29  | -36.014 |
| Ketoprofen (Actron)                  | 254.281 22071-15-4   | -5.226 | -0.275 | -1.331 | -0.161 | -30.041 |
| Acipimox                             | 154.123 51037-30-0   | -5.222 | -0.475 | -0.891 | -0.106 | -16.135 |
| LCZ696                               | 915.979 936623-90-4  | -5.222 | -0.163 | -0.788 | -0.266 | -43.912 |
| Lornoxicam (Xefo)                    | 371.819 70374-39-9   | -5.221 | -0.227 | -1.476 | -0.197 | -38.99  |
| Benzyl alcohol                       | 108.138 100-51-6     | -5.22  | -0.653 | -1.097 | -0.289 | -14.951 |
| Obeticholic Acid                     | 420.625 459789-99-2  | -5.218 | -0.174 | -0.988 | -0.495 | -28.753 |
| Losartan potassium                   | 462.009 124750-99-8  | -5.218 | -0.174 | -1.19  | -0.285 | -42.393 |
| 2-Methoxyestradiol                   | 302.408 362-07-2     | -5.217 | -0.237 | -1.279 | -0.16  | -21.632 |
| Acemetacin (Emflex)                  | 415.824 53164-05-9   | -5.216 | -0.18  | -1.414 | -0.312 | -39.898 |
| Penciclovir                          | 253.258 39809-25-1   | -5.214 | -0.29  | -0.432 | -0.229 | -28.655 |
| N-Ethylmaleimide (NEM)               | 125.125 128-53-0     | -5.213 | -0.579 | -0.471 | -0.32  | -17.151 |
| Progesterone (Prometrium)            | 314.462 57-83-0      | -5.212 | -0.227 | -1.075 | -0.313 | -32.243 |
| Thiamphenicol (Thiophenicol)         | 356.222 15318-45-3   | -5.209 | -0.248 | -0.449 | -0.37  | -27.072 |
| Chlorquinaldol                       | 228.075 72-80-0      | -5.209 | -0.372 | -1.245 | -0.318 | -24.057 |
| Formononetin (Formononetol)          | 268.264 485-72-3     | -5.207 | -0.26  | -1.598 | -0.257 | -29.704 |
| Amantadine hydrochloride (Symmetrel) | 187.71 665-66-7      | -5.206 | -0.473 | -0.897 | -0.456 | -18.467 |

|                                             |         |             |        |        |        |        |         |
|---------------------------------------------|---------|-------------|--------|--------|--------|--------|---------|
| Triclabendazole                             | 359.658 | 68786-66-3  | -5.205 | -0.248 | -1.63  | -0.32  | -33.458 |
| Harmaline                                   | 214.263 | 304-21-2    | -5.204 | -0.325 | -1.048 | -0.127 | -24.994 |
| Antipyrine                                  | 188.226 | 60-80-0     | -5.202 | -0.372 | -1.224 | -0.32  | -24.653 |
| Levofloxacin (Levaquin)                     | 361.368 | 100986-85-4 | -5.202 | -0.2   | -0.997 | -0.306 | -31.534 |
| Serotonin HCl                               | 212.676 | 153-98-0    | -5.195 | -0.4   | -0.856 | -0.314 | -18.015 |
| Bicalutamide (Casodex)                      | 430.373 | 90357-06-5  | -5.195 | -0.179 | -0.668 | -0.214 | -39.328 |
| Moroxydine HCl                              | 207.661 | 3160-91-6   | -5.195 | -0.433 | -0.616 | -0.53  | -19.601 |
| Histamine Phosphate                         | 307.135 | 51-74-1     | -5.194 | -0.649 | -0.319 | -0.554 | -9.987  |
| Trilostane                                  | 329.433 | 13647-35-3  | -5.194 | -0.216 | -1.464 | -0.16  | -35.087 |
| Dihydrotestosterone (DHT)                   | 290.44  | 521-18-6    | -5.193 | -0.247 | -1.474 | -0.16  | -32.283 |
| Minocycline HCl                             | 493.937 | 13614-98-7  | -5.19  | -0.157 | -0.78  | -0.163 | -39.711 |
| Crisaborole (AN2728)                        | 251.045 | 906673-24-3 | -5.188 | -0.273 | -1     | -0.219 | -23.443 |
| Deoxycorticosterone acetate                 | 372.498 | 56-47-3     | -5.186 | -0.192 | -1.132 | -0.32  | -40.648 |
| Amlexanox                                   | 298.293 | 68302-57-8  | -5.184 | -0.236 | -2.048 | 0      | -32.315 |
| Maltol                                      | 126.11  | 118-71-8    | -5.184 | -0.576 | -1.18  | -0.217 | -16.558 |
| Sodium ascorbate                            | 201.13  | 134-03-2    | -5.183 | -0.432 | -0.891 | -0.142 | -17.185 |
| Povidone iodine                             | 141.211 | 25655-41-8  | -5.182 | -0.518 | -0.972 | -0.255 | -16.593 |
| Hexestrol (Bibenzyol)                       | 270.366 | 84-16-2     | -5.181 | -0.259 | -1.277 | -0.454 | -25.045 |
| Nafamostat mesylate                         | 539.582 | 82956-11-4  | -5.181 | -0.199 | -0.91  | -0.343 | -37.785 |
| Phentolamine Mesylate                       | 377.458 | 65-28-1     | -5.18  | -0.247 | -1.264 | -0.294 | -25.463 |
| Rucaparib (AG-014699,PF-01367338) phosphate | 421.359 | 459868-92-9 | -5.179 | -0.216 | -0.565 | -0.715 | -30.657 |
| Favipiravir (T-705)                         | 157.103 | 259793-96-9 | -5.177 | -0.471 | -0.528 | -0.285 | -20.762 |
| p-Coumaric Acid                             | 164.158 | 501-98-4    | -5.176 | -0.431 | -0.427 | -0.402 | -15.969 |
| Sulfalene(SMPZ)                             | 280.303 | 152-47-6    | -5.174 | -0.272 | -0.864 | -0.444 | -27.817 |
| L-Cycloserine                               | 102.092 | 339-72-0    | -5.171 | -0.739 | -0.282 | -0.613 | -14.284 |
| Sparfloxacin                                | 392.4   | 110871-86-8 | -5.171 | -0.185 | -1.024 | -0.388 | -38.515 |
| Dopamine hydrochloride (Inotropin)          | 189.639 | 62-31-7     | -5.17  | -0.47  | -0.836 | -0.144 | -17.08  |
| Chloroxylonol                               | 156.609 | 88-04-0     | -5.166 | -0.517 | -1.166 | -0.16  | -17.959 |
| Tenoxicam(Mobiflex)                         | 337.374 | 59804-37-4  | -5.165 | -0.235 | -1.337 | -0.289 | -36.464 |
| Guaiacol                                    | 124.137 | 32994       | -5.164 | -0.574 | -1.02  | -0.151 | -17.23  |
| Tioconazole                                 | 387.711 | 65899-73-2  | -5.162 | -0.224 | -1.475 | -0.283 | -33.099 |
| Kinetin (6-Furfuryladenine)                 | 215.211 | 525-79-1    | -5.16  | -0.322 | -1.1   | -0.472 | -28.133 |
| Azaperone                                   | 327.396 | 1649-18-9   | -5.16  | -0.215 | -1.558 | -0.538 | -30.257 |
| Calcium Dobesilate                          | 189.166 | 20123-80-2  | -5.159 | -0.43  | -0.093 | -0.304 | -8.459  |
| 2-Thiouracil                                | 128.152 | 141-90-2    | -5.158 | -0.645 | -0.59  | -0.16  | -21.266 |

|                                          |          |              |        |        |        |        |         |
|------------------------------------------|----------|--------------|--------|--------|--------|--------|---------|
| Acetanilide (Antifebrin)                 | 135.163  | 103-84-4     | -5.158 | -0.516 | -0.663 | -0.371 | -19.606 |
| Pirarubicin                              | 627.636  | 72496-41-4   | -5.157 | -0.115 | -1.097 | -0.056 | -45.214 |
| Famciclovir (Famvir)                     | 321.332  | 104227-87-4  | -5.157 | -0.224 | -0.339 | -1.015 | -30.298 |
| Duvelisib (IPI-145, INK1197)             | 416.863  | 1201438-56-3 | -5.155 | -0.172 | -1.52  | -0.145 | -41.258 |
| Flibanserin                              | 390.402  | 167933-07-5  | -5.155 | -0.184 | -1.178 | -0.315 | -34.116 |
| Valaciclovir HCl                         | 360.797  | 124832-27-5  | -5.154 | -0.224 | -0.941 | -0.78  | -33.172 |
| Domperidone (Motilium)                   | 425.911  | 57808-66-9   | -5.153 | -0.172 | -1.367 | -0.155 | -39.872 |
| Thymidine                                | 242.229  | 50-89-5      | -5.153 | -0.303 | -0.387 | -0.288 | -21.938 |
| Decitabine                               | 228.205  | 2353-33-5    | -5.15  | -0.322 | -0.004 | -0.367 | -24.311 |
| Enrofloxacin                             | 359.395  | 93106-60-6   | -5.149 | -0.198 | -1.058 | -0.217 | -32.313 |
| Mefenamic Acid                           | 241.285  | 61-68-7      | -5.149 | -0.286 | -0.992 | -0.269 | -27.265 |
| Ilaprazole                               | 366.437  | 172152-36-2  | -5.147 | -0.198 | -1.309 | -0.16  | -36.427 |
| Pimobendan (Vetmedin)                    | 334.372  | 74150-27-9   | -5.146 | -0.206 | -1.051 | -0.16  | -32.82  |
| Xanthinol Nicotinate                     | 434.446  | 437-74-1     | -5.145 | -0.234 | -0.589 | -0.544 | -32.008 |
| Mirabegron (YM178)                       | 396.506  | 223673-61-8  | -5.145 | -0.184 | -1.068 | -0.864 | -34.002 |
| Axitinib                                 | 386.47   | 319460-85-0  | -5.144 | -0.184 | -1.553 | -0.175 | -42.317 |
| Citric acid trilithium salt tetrahydrate | 281.984  | 6080-58-6    | -5.143 | -0.321 | -0.469 | -0.154 | -15.229 |
| Fluorometholone Acetate                  | 418.498  | 694485       | -5.143 | -0.171 | -0.903 | -0.453 | -39.085 |
| Praziquantel (Biltricide)                | 312.406  | 55268-74-1   | -5.142 | -0.224 | -1.113 | -0.233 | -37.089 |
| L-Tryptophan                             | 204.225  | 73-22-3      | -5.142 | -0.343 | -0.313 | -0.319 | -18.623 |
| Masitinib (AB1010)                       | 498.642  | 790299-79-5  | -5.14  | -0.143 | -2.824 | -0.075 | -51.476 |
| Naphazoline hydrochloride (Naphcon)      | 246.735  | 550-99-2     | -5.139 | -0.321 | -1.208 | -0.16  | -21.387 |
| Glucosamine hydrochloride                | 215.632  | 66-84-2      | -5.138 | -0.428 | -0.145 | -0.028 | -10.261 |
| Aliskiren Hemifumarate                   | 1219.589 | 173334-58-2  | -5.135 | -0.132 | -0.838 | -0.829 | -39.548 |
| (-)-Huperzine A (HupA)                   | 242.316  | 102518-79-6  | -5.135 | -0.285 | -1.162 | -0.276 | -26.454 |
| Gramine                                  | 174.242  | 87-52-5      | -5.135 | -0.395 | -0.703 | -0.32  | -21.062 |
| NEXIUM (esomeprazole magnesium)          | 713.121  | 161973-10-0  | -5.135 | -0.214 | -1.059 | -0.225 | -33.931 |
| Clopidol                                 | 192.043  | 2971-90-6    | -5.132 | -0.467 | -1.422 | -0.181 | -20.87  |
| Melibiose                                | 342.296  | 585-99-9     | -5.132 | -0.223 | -0.679 | 0      | -20.561 |
| Corticosterone                           | 346.461  | 50-22-6      | -5.127 | -0.205 | -0.704 | -0.544 | -23.736 |
| Furazolidone                             | 225.158  | 67-45-8      | -5.121 | -0.32  | -0.671 | -0.463 | -29.384 |
| Miglitol (Glyset)                        | 207.224  | 72432-03-2   | -5.121 | -0.366 | -0.343 | -0.614 | -14.417 |
| Uracil                                   | 112.087  | 66-22-8      | -5.121 | -0.64  | -0.368 | -0.342 | -15.6   |
| Entinostat (MS-275, SNDX-275)            | 376.409  | 209783-80-2  | -5.121 | -0.183 | -1.545 | -0.374 | -41.52  |
| Meloxicam (Mobic)                        | 351.401  | 71125-38-7   | -5.12  | -0.223 | -0.765 | -0.247 | -35.744 |

|                                    |                     |        |        |        |        |         |
|------------------------------------|---------------------|--------|--------|--------|--------|---------|
| Dehydroepiandrosterone (DHEA)      | 288.424 53-43-0     | -5.117 | -0.244 | -1.205 | -0.32  | -31.933 |
| 4-Biphenylacetic acid              | 212.244 5728-52-9   | -5.115 | -0.32  | -1.589 | 0      | -20.666 |
| Mestranol                          | 310.43 72-33-3      | -5.115 | -0.222 | -1.764 | -0.16  | -24.765 |
| PCI-32765 (Ibrutinib)              | 440.497 936563-96-1 | -5.115 | -0.155 | -1.36  | -0.268 | -46.256 |
| Tiratricol                         | 621.932 51-24-1     | -5.114 | -0.244 | -1.121 | -0.304 | -30.596 |
| Ethionamide                        | 166.243 536-33-4    | -5.113 | -0.465 | -0.794 | -0.213 | -23.738 |
| Bazedoxifene HCl                   | 507.063 198480-56-7 | -5.112 | -0.146 | -1.384 | -0.51  | -44.453 |
| Ciclopirox ethanolamine            | 268.352 41621-49-2  | -5.112 | -0.341 | -1.13  | -0.122 | -27.097 |
| Thalidomide                        | 258.229 50-35-1     | -5.112 | -0.269 | -0.51  | -0.387 | -31.677 |
| GSK1120212 (Trametinib)            | 615.395 871700-17-3 | -5.11  | -0.138 | -0.936 | -0.466 | -49.518 |
| Memantine hydrochloride (Namenda)  | 215.763 41100-52-1  | -5.107 | -0.393 | -1.231 | -0.191 | -22.73  |
| Amoxicillin (Amoxycillin)          | 365.404 26787-78-0  | -5.105 | -0.204 | -0.638 | -0.152 | -36.855 |
| Medetomidine HCl                   | 236.74 86347-15-1   | -5.104 | -0.34  | -1.477 | -0.31  | -23.709 |
| Zidovudine (Retrovir)              | 267.241 30516-87-1  | -5.102 | -0.269 | -0.639 | -0.546 | -30.687 |
| Abscisic Acid (Dormin)             | 264.317 21293-29-8  | -5.099 | -0.268 | -0.919 | -0.182 | -28.739 |
| Pilocarpine HCl                    | 244.718 54-71-7     | -5.098 | -0.34  | -0.671 | -0.403 | -23.896 |
| Ethinyl Estradiol                  | 296.403 57-63-6     | -5.097 | -0.232 | -1.326 | -0.16  | -26.557 |
| Topiramate                         | 339.362 97240-79-4  | -5.097 | -0.232 | -0.367 | -0.539 | -25.408 |
| Ponatinib (AP24534)                | 532.559 943319-70-8 | -5.096 | -0.131 | -2.123 | -0.32  | -45.12  |
| Carbazochrome sodium sulfonate     | 322.273 51460-26-5  | -5.093 | -0.255 | -0.431 | -0.446 | -23.805 |
| Maltitol                           | 344.312 585-88-6    | -5.092 | -0.221 | -0.565 | 0      | -19.588 |
| Trapidil                           | 205.26 15421-84-8   | -5.091 | -0.339 | -0.339 | -0.26  | -26.102 |
| Adrucil (Fluorouracil)             | 130.077 51-21-8     | -5.09  | -0.566 | -0.5   | -0.16  | -17.429 |
| Tauroursodeoxycholic Acid          | 499.704 14605-22-2  | -5.089 | -0.15  | -0.926 | -0.295 | -32.934 |
| ARN-509                            | 477.435 956104-40-8 | -5.089 | -0.154 | -1.195 | -0.31  | -43.554 |
| Combretastatin A4                  | 316.348 117048-59-6 | -5.088 | -0.221 | -1.192 | -0.202 | -34.694 |
| Phenformin hydrochloride           | 241.721 834-28-6    | -5.086 | -0.339 | -1.169 | -0.997 | -22.327 |
| Rimantadine (Flumadine)            | 179.302 13392-28-4  | -5.085 | -0.391 | -1.26  | -0.272 | -17.225 |
| Vilazodone Hydrochloride           | 477.986 163521-08-2 | -5.083 | -0.154 | -1.317 | -0.32  | -39.455 |
| Etidronate (Didronel)              | 206.028 2809-21-4   | -5.083 | -0.462 | -0.299 | 0      | -16.032 |
| Enalaprilat dihydrate              | 384.424 84680-54-6  | -5.083 | -0.203 | -0.89  | -0.044 | -34.563 |
| Eflornithine hydrochloride hydrate | 236.645 96020-91-6  | -5.082 | -0.423 | -0.399 | -0.48  | -7.186  |
| Amfebutamone (Bupropion) HCl       | 276.202 31677-93-7  | -5.081 | -0.318 | -1.563 | -0.316 | -26.407 |
| Clorprenaline HCl                  | 250.165 6933-90-0   | -5.08  | -0.363 | -1.217 | -0.304 | -21.381 |
| Ondansetron hydrochloride (Zofran) | 329.824 99614-01-4  | -5.078 | -0.231 | -0.945 | -0.125 | -32.956 |

|                                  |          |              |        |        |        |        |         |
|----------------------------------|----------|--------------|--------|--------|--------|--------|---------|
| Everolimus (RAD001)              | 958.224  | 159351-69-6  | -5.078 | -0.075 | -1.051 | -0.174 | -47.24  |
| Terpin (hydrate)                 | 190.28   | 201256       | -5.077 | -0.423 | -1.139 | -0.32  | -20.92  |
| Chlormadinone acetate            | 404.927  | 302-22-7     | -5.077 | -0.181 | -1.383 | -0.32  | -40.473 |
| Fluconazole                      | 306.271  | 86386-73-4   | -5.07  | -0.23  | -0.881 | -0.185 | -29.554 |
| Mycophenolate mofetil (CellCept) | 433.495  | 128794-94-5  | -5.069 | -0.164 | -1.317 | -0.417 | -39.459 |
| Sulfadiazine                     | 250.277  | 68-35-9      | -5.068 | -0.298 | -0.864 | -0.307 | -22.294 |
| Aniracetam                       | 219.237  | 72432-10-1   | -5.067 | -0.317 | -0.928 | -0.41  | -24.631 |
| Guanfacine Hydrochloride         | 282.554  | 29110-48-3   | -5.067 | -0.338 | -0.325 | -0.525 | -22.419 |
| Cysteamine HCl                   | 113.61   | 156-57-0     | -5.067 | -1.267 | -0.354 | -0.72  | -9.347  |
| Meropenem                        | 383.462  | 96036-03-2   | -5.066 | -0.195 | -0.653 | -0.243 | -38.295 |
| Daclatasvir (BMS-790052)         | 738.875  | 1009119-64-5 | -5.064 | -0.094 | -1.731 | 0      | -57.299 |
| Cephapirin Benzathine            | 1087.27  | 97468-37-6   | -5.063 | -0.181 | -1.52  | 0      | -45.784 |
| 4-Aminobenzoic acid              | 137.136  | 150-13-0     | -5.062 | -0.506 | -0.595 | -0.3   | -15.416 |
| Clindamycin HCl                  | 461.444  | 21462-39-5   | -5.062 | -0.187 | -1.274 | 0      | -34.306 |
| Dexrazoxane Hydrochloride        | 304.73   | 149003-01-0  | -5.059 | -0.266 | -0.385 | -0.692 | -28.085 |
| Pefloxacin mesylate              | 429.463  | 70458-95-6   | -5.059 | -0.211 | -1.186 | -0.015 | -32.468 |
| Pefloxacin Mesylate Dihydrate    | 465.494  | 149676-40-4  | -5.059 | -0.211 | -1.159 | -0.013 | -32.432 |
| Cefazedone                       | 548.443  | 56187-47-4   | -5.058 | -0.153 | -0.829 | 0      | -54.649 |
| Agomelatine                      | 243.301  | 138112-76-2  | -5.058 | -0.281 | -1.139 | -0.492 | -29.639 |
| Tyloxapol                        | 789.177  | 25301-02-4   | -5.057 | -0.089 | -1.349 | -0.453 | -52.305 |
| Isosorbide Mononitrate           | 191.139  | 16051-77-7   | -5.057 | -0.389 | -0.783 | -0.253 | -22.445 |
| Difluprednate                    | 508.551  | 23674-86-4   | -5.056 | -0.14  | -1.856 | -0.108 | -37.749 |
| Fimasartan                       | 501.646  | 247257-48-3  | -5.054 | -0.14  | -1.623 | -0.421 | -44.496 |
| Varenicline tartrate             | 361.349  | 375815-87-5  | -5.053 | -0.316 | -1.531 | 0      | -25.536 |
| cephapirin sodium                | 445.445  | 24356-60-3   | -5.053 | -0.18  | -1.305 | -0.395 | -39.754 |
| Doxercalciferol (Hectorol)       | 412.648  | 54573-75-0   | -5.051 | -0.168 | -1.986 | -0.267 | -29.613 |
| Netilmicin Sulfate               | 1441.551 | 7664-93-9    | -5.05  | -0.153 | -1.274 | -0.45  | -31.709 |
| Acyclovir (Aciclovir)            | 225.205  | 59277-89-3   | -5.049 | -0.316 | -0.53  | -0.285 | -19.612 |
| Disodium Cromoglycate            | 512.33   | 15826-37-6   | -5.048 | -0.148 | -1.572 | -0.152 | -41.367 |
| Cloxiquine                       | 179.603  | 130-16-5     | -5.047 | -0.421 | -0.861 | -0.16  | -19.313 |
| Glyburide (Glibenclamide)        | 494.004  | 10238-21-8   | -5.044 | -0.153 | -2.119 | -0.32  | -40.227 |
| Trenbolone acetate               | 312.403  | 10161-34-9   | -5.041 | -0.219 | -0.931 | -0.319 | -32.782 |
| Formestane                       | 302.408  | 566-48-3     | -5.04  | -0.229 | -0.98  | -0.214 | -30.757 |
| Gabapentin Hydrochloride         | 207.698  | 60142-95-2   | -5.033 | -0.419 | -0.708 | -0.514 | -15.24  |
| Zolmitriptan (Zomig)             | 287.357  | 139264-17-8  | -5.033 | -0.24  | -0.942 | -0.679 | -27.956 |

|                                     |                     |        |        |        |        |         |
|-------------------------------------|---------------------|--------|--------|--------|--------|---------|
| Primaquine Diphosphate              | 455.337 63-45-6     | -5.029 | -0.265 | -1.698 | -0.608 | -27.931 |
| Guanabenz (WY-8678) Acetate         | 291.134 23256-50-0  | -5.028 | -0.359 | -1.15  | -0.508 | -25.061 |
| Indigo                              | 262.263 482-89-3    | -5.028 | -0.251 | -1.163 | -0.313 | -29.153 |
| Clindamycin                         | 424.983 18323-44-9  | -5.027 | -0.186 | -1.25  | 0      | -34.345 |
| Gabapentin (Neurontin)              | 171.237 60142-96-3  | -5.027 | -0.419 | -0.686 | -0.523 | -15.182 |
| Irsogladine                         | 256.091 57381-26-7  | -5.025 | -0.314 | -0.395 | -0.391 | -30.363 |
| Oseltamivir Phosphate               | 410.4 204255-11-8   | -5.025 | -0.228 | -1.192 | -0.619 | -27.678 |
| Lansoprazole                        | 369.361 103577-45-3 | -5.023 | -0.201 | -1.39  | 0      | -35.014 |
| Chlorocresol                        | 142.583 59-50-7     | -5.021 | -0.558 | -0.905 | -0.15  | -14.437 |
| Tebipenem pivoxil (L-084)           | 497.628 161715-24-8 | -5.021 | -0.152 | -1.213 | -0.456 | -43.714 |
| Glycocholic acid                    | 465.623 475-31-0    | -5.021 | -0.152 | -0.688 | -0.622 | -33.621 |
| Ramelteon                           | 259.343 196597-26-9 | -5.02  | -0.264 | -1.709 | -0.32  | -25.303 |
| Olanzapine (Zyprexa)                | 312.433 132539-06-1 | -5.02  | -0.228 | -1.71  | 0      | -33.221 |
| Droperidol                          | 379.427 548-73-2    | -5.018 | -0.179 | -1.644 | -0.16  | -33.903 |
| Cephalothin                         | 418.42 58-71-9      | -5.017 | -0.193 | -1.442 | -0.524 | -36.26  |
| Efonidipine                         | 631.655 111011-63-3 | -5.014 | -0.111 | -1.954 | -0.32  | -46.354 |
| MK-2048                             | 461.874 869901-69-9 | -5.009 | -0.157 | -1.346 | -0.196 | -45.204 |
| Guaiazulene                         | 198.303 489-84-9    | -5.008 | -0.334 | -1.641 | 0      | -21.842 |
| S-(+)-Rolipram                      | 275.343 85416-73-5  | -5.005 | -0.25  | -1.335 | -0.431 | -27.138 |
| Atomoxetine HCl                     | 291.816 82248-59-7  | -5.003 | -0.263 | -2.134 | -0.437 | -29.31  |
| Leflunomide                         | 270.207 75706-12-6  | -5.003 | -0.263 | -0.859 | -0.16  | -25.653 |
| Quinidine sulfate                   | 782.943 6591-63-5   | -4.997 | -0.208 | -1.524 | -0.207 | -31.645 |
| carbadox                            | 262.221 1791337     | -4.996 | -0.263 | -1.264 | -0.16  | -24.915 |
| Tivozanib (AV-951)                  | 454.863 475108-18-0 | -4.992 | -0.156 | -1.969 | -0.38  | -47.934 |
| Chlorzoxazone                       | 169.565 95-25-0     | -4.991 | -0.454 | -0.773 | -0.32  | -20.501 |
| Ipratropium bromide                 | 412.361 22254-24-6  | -4.991 | -0.208 | -1.586 | 0      | -29.129 |
| Rifapentine                         | 877.031 61379-65-5  | -4.988 | -0.079 | -1.44  | 0      | -47.422 |
| Dutasteride                         | 528.53 164656-23-9  | -4.988 | -0.135 | -1.271 | 0      | -48.727 |
| Benazepril hydrochloride            | 460.95 86541-74-4   | -4.988 | -0.161 | -0.949 | -0.427 | -36.223 |
|                                     | 294.391 118-10-5    | -4.986 | -0.227 | -1.465 | -0.177 | -33.364 |
| Broxyquinoline                      | 302.95 521-74-4     | -4.984 | -0.383 | -1.23  | -0.32  | -25.283 |
| Phenytoin (Lepitoin)                | 252.268 57-41-0     | -4.984 | -0.262 | -0.92  | -0.454 | -26.931 |
| Iminostilbene                       | 193.244 256-96-2    | -4.984 | -0.332 | -1.494 | 0      | -24.112 |
| Medroxyprogesterone acetate         | 386.524 71-58-9     | -4.981 | -0.178 | -1.18  | -0.32  | -40.649 |
| Yohimbine hydrochloride (Antagonil) | 390.904 65-19-0     | -4.98  | -0.192 | -1.588 | 0      | -33.313 |

|                                      |                      |        |        |        |        |         |
|--------------------------------------|----------------------|--------|--------|--------|--------|---------|
| L-Glutamine                          | 146.144 56-85-9      | -4.977 | -0.498 | -0.137 | -0.94  | -13.908 |
| Albendazole (Albenza)                | 265.331 54965-21-8   | -4.976 | -0.276 | -1.388 | -0.296 | -29.78  |
| Timolol Maleate                      | 432.492 26921-17-5   | -4.973 | -0.237 | -1.314 | -0.576 | -33.381 |
| Loperamide hydrochloride             | 513.498 34552-83-5   | -4.972 | -0.146 | -1.59  | -0.456 | -42.228 |
| Methimazole (Tapazole, Northyx)      | 114.169 60-56-0      | -4.969 | -0.71  | -0.427 | -0.159 | -17.498 |
| Aceclofenac                          | 354.185 89796-99-6   | -4.969 | -0.216 | -0.934 | -0.195 | -30.651 |
| ATP (Adenosine-Triphosphate)         | 551.145 987-65-5     | -4.964 | -0.16  | -0.546 | 0      | -37.956 |
| Methylprednisolone                   | 374.471 83-43-2      | -4.962 | -0.184 | -0.758 | -0.3   | -32.619 |
| Benznidazole                         | 260.249 22994-85-0   | -4.962 | -0.261 | -0.834 | -0.269 | -29.865 |
| Propacetamol hydrochloride           | 300.781 66532-86-3   | -4.959 | -0.261 | -1.288 | -0.366 | -28.34  |
| Flurbiprofen                         | 244.261 51543-39-6   | -4.957 | -0.275 | -1.147 | -0.121 | -26.158 |
| Tinidazole                           | 247.272 19387-91-8   | -4.956 | -0.31  | -0.629 | 0      | -25.474 |
| Acridinium Bromide                   | 564.555 320345-99-1  | -4.952 | -0.15  | -1.603 | -0.097 | -39.256 |
| Homatropine Methylbromide            | 370.281 80-49-9      | -4.95  | -0.236 | -1.194 | 0      | -27.903 |
| Carvedilol                           | 406.474 72956-09-3   | -4.949 | -0.165 | -2.08  | -0.013 | -39.24  |
| Imidapril HCl                        | 441.906 89396-94-1   | -4.948 | -0.171 | -1.309 | -0.012 | -42.986 |
| Conivaptan HCl (Vaprisol)            | 535.035 168626-94-6  | -4.947 | -0.13  | -1.551 | -0.202 | -49.688 |
| Teneligliptin hydrobromide           | 426.578 906093-29-6  | -4.947 | -0.165 | -1.828 | -0.283 | -40.809 |
| Cinchonidine                         | 294.391 485-71-2     | -4.941 | -0.225 | -1.497 | -0.16  | -30.569 |
| Altrenogest                          | 310.43 850-52-2      | -4.94  | -0.215 | -1.583 | -0.16  | -23.396 |
| Ticagrelor                           | 522.568 274693-27-5  | -4.939 | -0.137 | -0.888 | -0.024 | -36.85  |
| Tizanidine HCl                       | 290.172 64461-82-1   | -4.938 | -0.309 | -1.331 | -0.174 | -28.265 |
| Lynestrenol                          | 284.436 52-76-6      | -4.937 | -0.235 | -1.994 | 0      | -30.95  |
| Sodium benzoate                      | 144.103 532-32-1     | -4.935 | -0.548 | -1.144 | -0.153 | -12.831 |
| Histamine 2HCl                       | 184.067 56-92-8      | -4.934 | -0.617 | -0.336 | -0.46  | -12.702 |
| Formoterol hemifumarate              | 804.882 43229-80-7   | -4.934 | -0.197 | -0.883 | -0.612 | -30.575 |
| Hydroxyprogesterone caproate         | 428.604 630-56-8     | -4.933 | -0.159 | -2.154 | -0.256 | -34.493 |
| Doxycycline hyclate                  | 1025.875 24390-14-5  | -4.927 | -0.154 | -0.365 | -0.191 | -34.07  |
| Aspirin (Acetylsalicylic acid)       | 180.157 50-78-2      | -4.925 | -0.379 | -0.497 | -0.277 | -22.848 |
| Olopatadine hydrochloride (Opatanol) | 373.873 140462-76-6  | -4.925 | -0.197 | -1.512 | 0      | -31.045 |
| Coumarin                             | 146.143 91-64-5      | -4.922 | -0.447 | -1.097 | -0.193 | -20.838 |
| Plerixafor 8HCl (DB06809)            | 794.469 155148-31-5  | -4.922 | -0.137 | -1.438 | -0.456 | -48.976 |
| Halofuginone                         | 414.681 55837-20-2   | -4.919 | -0.205 | -0.844 | -0.435 | -34.287 |
| Florfenicol                          | 358.213 73231-34-2   | -4.919 | -0.234 | -0.534 | -0.304 | -29.201 |
| PF-06463922                          | 406.413 1454846-35-5 | -4.916 | -0.164 | -1.048 | -0.16  | -40.642 |

|                                    |         |             |        |        |        |        |         |
|------------------------------------|---------|-------------|--------|--------|--------|--------|---------|
| Dihydroartemisinin (DHA)           | 284.348 | 71939-50-9  | -4.916 | -0.246 | -0.98  | 0      | -28.817 |
| Prednisone (Adasone)               | 358.428 | 19420       | -4.915 | -0.189 | -0.886 | -0.152 | -29.5   |
| Hydrocortisone (Cortisol)          | 362.46  | 50-23-7     | -4.913 | -0.189 | -0.854 | -0.145 | -29.414 |
| Prednisolone                       | 360.444 | 50-24-8     | -4.913 | -0.189 | -0.71  | -0.145 | -29.668 |
| Tranylcypromine (2-PCPA) HCl       | 169.651 | 4548-34-9   | -4.913 | -0.491 | -1.375 | -0.375 | -17.527 |
| Honokiol                           | 266.334 | 35354-74-6  | -4.913 | -0.246 | -1.654 | -0.464 | -27.725 |
| Furaltadone HCl                    | 360.75  | 3759-92-0   | -4.911 | -0.214 | -0.658 | -0.323 | -31.945 |
| Valdecoxib                         | 314.359 | 181695-72-7 | -4.906 | -0.223 | -0.739 | -0.265 | -32.507 |
| Hydroxychloroquine Sulfate         | 433.95  | 747-36-4    | -4.905 | -0.213 | -1.747 | -0.412 | -31.983 |
| Luliconazole                       | 354.277 | 187164-19-8 | -4.904 | -0.234 | -1.587 | -0.22  | -36.423 |
| Loteprednol etabonate              | 466.952 | 82034-46-6  | -4.902 | -0.153 | -1.695 | -0.476 | -37.79  |
| (+)-Borneol                        | 154.249 | 464-43-7    | -4.9   | -0.445 | -1.5   | 0      | -20.742 |
| Voriconazole                       | 349.31  | 137234-62-9 | -4.9   | -0.196 | -1.035 | -0.16  | -33.147 |
| Hydroquinidine                     | 326.433 | 1435-55-8   | -4.899 | -0.204 | -1.367 | -0.16  | -32.044 |
| Dantrolene sodium hemiheptahydrate | 326.433 | 24868-20-0  | -4.899 | -0.204 | -1.367 | -0.16  | -32.044 |
| Dropropizine                       | 236.31  | 17692-31-8  | -4.898 | -0.288 | -1.579 | -0.456 | -24.847 |
| Marbofloxacin                      | 362.356 | 115550-35-1 | -4.898 | -0.188 | -1.162 | 0      | -35.41  |
| Borneol                            | 154.249 | 507-70-0    | -4.898 | -0.445 | -1.497 | 0      | -20.707 |
| Rofecoxib (Vioxx)                  | 314.356 | N/A         | -4.898 | -0.223 | -1.205 | -0.195 | -33.476 |
| Palonosetron HCl                   | 332.868 | 135729-62-3 | -4.896 | -0.223 | -1.44  | 0      | -33.144 |
| Triptolide                         | 360.401 | 38748-32-2  | -4.891 | -0.188 | -0.911 | -0.046 | -26.014 |
| Calcitriol (Rocaltrol)             | 416.636 | 32222-06-3  | -4.89  | -0.163 | -1.918 | -0.442 | -28.984 |
| Naratriptan HCl                    | 371.925 | 143388-64-1 | -4.89  | -0.213 | -0.645 | -0.435 | -30.095 |
| Clonidine hydrochloride (Catapres) | 266.555 | 4205-91-8   | -4.89  | -0.349 | -1.412 | -0.16  | -22.379 |
| Penfluridol                        | 523.965 | 26864-56-2  | -4.887 | -0.136 | -1.799 | -0.16  | -39.971 |
| Bethanechol chloride               | 196.675 | 590-63-6    | -4.885 | -0.444 | -0.716 | -0.332 | -14.684 |
| bendroflumethiazide                | 421.415 | 73-48-3     | -4.885 | -0.181 | -1.044 | -0.046 | -35.103 |
| Terazosin HCl Dihydrate            | 459.924 | 70024-40-7  | -4.88  | -0.174 | -1.279 | -0.41  | -41.311 |
| Eltrombopag olamine                | 564.633 | 496775-62-3 | -4.88  | -0.148 | -1.229 | -0.304 | -43.08  |
| Lercanidipine (hydrochloride)      | 648.188 | 132866-11-6 | -4.879 | -0.108 | -1.759 | -0.033 | -55.107 |
| Pyridostigmine Bromide (Mestinon)  | 261.116 | 101-26-8    | -4.879 | -0.375 | -0.952 | -0.215 | -21.49  |
| Crystal violet                     | 407.979 | 548-62-9    | -4.876 | -0.174 | -0.786 | 0      | -34.651 |
| Sertraline HCl                     | 342.691 | 79559-97-0  | -4.872 | -0.244 | -1.493 | -0.16  | -30.26  |
| Azilsartan Medoxomil (TAK-491)     | 568.534 | 863031-21-4 | -4.871 | -0.116 | -1.332 | -0.595 | -53.938 |
| Ornidazole                         | 219.626 | 16773-42-5  | -4.87  | -0.348 | -0.789 | 0      | -22.796 |



|                                         |         |                  |        |        |        |        |         |       |
|-----------------------------------------|---------|------------------|--------|--------|--------|--------|---------|-------|
| (-)-Tetramisole                         | 240.752 | 16595-80-5       | -4.868 | -0.348 | -1.309 | 0      | -25.907 |       |
| Methoxyphenamine Hydrochloride          | 215.72  | 1347292          | -4.867 | -0.374 | -0.813 | -0.587 | -18.231 |       |
| Sulfamethizole (Proklar)                | 270.331 | 144-82-1         | -4.866 | -0.286 | -1.241 | -0.172 | -31.426 |       |
| Epalrestat                              | 319.399 | 82159-09-9       | -4.865 | -0.232 | -0.561 | -0.317 | -26.042 |       |
| (+)-Camphor                             | 152.233 | 464-49-3         | -4.863 | -0.442 | -1.39  | 0      | -20.473 |       |
| Asenapine maleate                       | 401.84  | 65576-45-6, 1358 | -4.862 | -0.243 | -1.334 | -0.187 | -28.486 |       |
| Dextromethorphan (hydrobromide hydrate) | 370.324 | 6700-34-1        | -4.86  | -0.243 | -1.263 | -0.259 | -25.74  |       |
| Doxazosin mesylate                      | 547.581 | 77883-43-3       | -4.859 | -0.147 | -1.419 | -0.398 | -44.58  |       |
| Glimepiride                             | 490.616 | 93479-97-1       | -4.858 | -0.143 | -1.448 | -0.32  | -44.662 |       |
| Avobenzon (Parsol 1789)                 | 310.387 | 70356-09-1       | -4.858 | -0.211 | -1.105 | -0.636 | -31.235 |       |
| Methyl 4-hydroxybenzoate                | 152.147 | 99-76-3          | -4.857 | -0.442 | -0.829 | -0.32  | -19.065 |       |
| Tetracycline hydrochloride              | 480.896 | 64-75-5          | -4.855 | -0.152 | -0.951 | -0.16  | -40.013 |       |
| Chlorpropamide                          | 276.74  | 94-20-2          | -4.854 | -0.286 | -1.334 | -0.317 | -31.484 |       |
| Emtricitabine                           | 247.247 | 143491-57-0      | -4.851 | -0.303 | -0.589 | -0.247 | -25.527 |       |
| 2-Deoxy-D-glucose                       | 164.156 | 154-17-6         | -4.851 | -0.441 | -0.55  | 0      | -16.044 |       |
| Linagliptin (BI-1356)                   | 472.542 | 668270-12-0      | -4.849 | -0.139 | -0.826 | -0.594 | -45.071 |       |
| Oxymatrine (Matrine N-oxide)            | 264.363 | 16837-52-8       | -4.848 | -0.255 | -1.211 | 0      | -31.444 |       |
| Ouabain                                 | 728.775 | 630-60-4         | -4.847 | -0.118 | -0.586 | 0      | -32.405 |       |
| Sivelestat sodium tetrahydrate          | 528.506 | 201677-61-4      | -4.845 | -0.162 | -1.662 | -0.253 | -35.611 |       |
| Sclareol                                | 308.499 | 515-03-7         | -4.844 | -0.22  | -1.127 | -0.29  | -24.18  |       |
| Nabumetone                              | 228.286 | 42924-53-8       | -4.844 | -0.285 | -1.078 | -0.225 | -22.117 |       |
| Buparvaquone                            | 326.429 | 88426-33-9       | -4.843 | -0.202 | -1.39  | -0.087 | -32.382 |       |
| Demeclocycline HCl                      | 501.314 | 64-73-3          | -4.842 | -0.151 | -1.012 | -0.148 | -28.023 |       |
| Sulfadoxine (Sulphadoxine)              | 310.329 | 2447-57-6        | -4.841 | -0.231 | -1.146 | -0.291 | -30.969 |       |
| Flupenthixol dihydrochloride            | 507.439 | 51529-01-2       | -4.84  | -0.161 | -1.115 | -0.548 | -31.537 |       |
| Fexofenadine HCl                        | 538.117 | 153439-40-8      | -4.84  | -0.131 | -1.372 | -0.361 | -36.105 |       |
| mesoridazine besylate                   | 544.749 | 32672-69-8       | -4.839 | -0.186 | -1.804 | 0      | -41.414 |       |
| Pirfenidone                             | 185.222 | 53179-13-8       | -4.839 | -0.346 | -1.368 | -0.155 | -24.915 |       |
| Diphemanil Methylsulfate                | 389.508 | 62-97-5          | -4.836 | -0.23  | -1.372 | 0      | -25.052 |       |
| Apramycin Sulfate                       | 637.656 | 65710-07-8       | -4.835 | -0.131 | -0.695 | -0.588 | -32.502 |       |
| Etodolac (Lodine)                       | 287.354 |                  |        |        |        |        |         |       |
|                                         | -0.396  | 0                | -0.303 | -0.094 | -0.014 | -0.042 | -0.192  | 4.837 |
| Tetrahydropalmatine hydrochloride       | 391.888 | 6024-85-7        | -4.831 | -0.186 | -1.321 | -0.32  | -32.133 |       |
| Tropicamide                             | 284.353 | 1508-75-4        | -4.831 | -0.23  | -1.15  | -0.564 | -31.118 |       |
| Oxybenzone                              | 228.243 | 131-57-7         | -4.83  | -0.284 | -1.443 | -0.16  | -28.423 |       |

|                                  |         |             |        |        |        |        |         |
|----------------------------------|---------|-------------|--------|--------|--------|--------|---------|
| Dehydrocostus Lactone            | 230.302 | 477-43-0    | -4.83  | -0.284 | -1     | -0.067 | -26.708 |
| Sulisobenzone                    | 308.306 | 4065-45-6   | -4.83  | -0.23  | -0.377 | 0      | -22.865 |
| Fomepizole (Antizol)             | 82.104  | 7554-65-6   | -4.828 | -0.805 | -0.785 | -0.32  | -12.901 |
| Eltrombopag                      | 442.467 | 496775-61-2 | -4.826 | -0.146 | -1.066 | -0.304 | -42.119 |
| Megestrol Acetate                | 384.508 | 595-33-5    | -4.825 | -0.172 | -1.142 | -0.327 | -33.846 |
| Dexmedetomidine                  | 200.28  | 113775-47-6 | -4.824 | -0.322 | -1.456 | -0.259 | -24.373 |
| Sucralose                        | 397.633 | 56038-13-2  | -4.822 | -0.21  | -1.015 | 0      | -27.002 |
| Lopinavir (ABT-378)              | 628.801 | 192725-17-0 | -4.821 | -0.105 | -1.757 | -0.178 | -50.442 |
| Neostigmine bromide (Prostigmin) | 303.195 | 114-80-7    | -4.821 | -0.301 | -0.749 | -0.074 | -25.137 |
| Desloratadine                    | 310.821 | 100643-71-8 | -4.82  | -0.219 | -1.152 | -0.205 | -33.267 |
| Lamotrigine                      | 256.091 | 84057-84-1  | -4.82  | -0.301 | -0.7   | -0.243 | -29.057 |
| Nicarbazin                       | 426.383 | 330-95-0    | -4.818 | -0.219 | -0.668 | -0.203 | -34.511 |
| Mequinol                         | 124.137 | 150-76-5    | -4.815 | -0.535 | -0.752 | -0.16  | -15.199 |
| Estrone                          | 270.366 | 53-16-7     | -4.814 | -0.241 | -0.64  | -0.544 | -28.249 |
| Pyrimethamine                    | 248.711 | 58-14-0     | -4.814 | -0.283 | -0.804 | -0.307 | -26.533 |
| (-)-Menthol                      | 156.265 | 2216-51-5   | -4.813 | -0.438 | -1.034 | -0.16  | -16.023 |
| Torsemide (Demadex)              | 348.42  | 56211-40-6  | -4.812 | -0.201 | -1.644 | -0.247 | -36.985 |
| Piperazine                       | 86.136  | 110-85-0    | -4.807 | -0.801 | -0.566 | -0.601 | -10.282 |
| Meptazinol HCl                   | 269.81  | 59263-76-2  | -4.806 | -0.283 | -1.192 | -0.179 | -24.993 |
| Ketoconazole                     | 531.431 | 65277-42-1  | -4.806 | -0.133 | -1.153 | -0.29  | -47.472 |
| Sulfamethoxazole                 | 253.278 | 723-46-6    | -4.805 | -0.283 | -1.062 | -0.16  | -28.109 |
| Pregnenolone                     | 316.478 | 145-13-1    | -4.804 | -0.209 | -1.3   | -0.165 | -34.487 |
| Capreomycin Sulfate              | 750.785 | 1405-37-4   | -4.801 | -0.104 | -0.705 | -0.353 | -47.879 |
| Sulfamethazine                   | 278.33  | 57-68-1     | -4.8   | -0.253 | -1.325 | -0.122 | -30.388 |
| Naproxen Sodium                  | 252.241 | 26159-34-2  | -4.799 | -0.282 | -1.403 | -0.177 | -23.396 |
| Benzocaine hydrochloride         | 201.65  | 23239-88-5  | -4.799 | -0.4   | -1.504 | -0.32  | -22.15  |
| Rotundine                        | 355.428 | 483-14-7    | -4.798 | -0.185 | -1.404 | -0.284 | -32.2   |
| Bromfenac Sodium                 | 356.147 | 91714-93-1  | -4.797 | -0.24  | -1.381 | -0.16  | -32.36  |
| Nimesulide                       | 308.31  | 51803-78-2  | -4.797 | -0.228 | -1.286 | 0      | -31.927 |
| Sulfamonomethoxine               | 280.303 | 1220-83-3   | -4.796 | -0.252 | -1.009 | -0.388 | -29.651 |
| Clioquinol                       | 305.5   | 130-26-7    | -4.795 | -0.369 | -1.21  | -0.32  | -25.376 |
| Darunavir Ethanolate (Prezista)  | 593.732 | 635728-49-3 | -4.791 | -0.126 | -1.031 | -0.576 | -35.271 |
| Probenecid (Benemid)             | 285.359 | 57-66-9     | -4.79  | -0.252 | -0.974 | 0      | -29.222 |
| Amfenac Sodium (monohydrate)     | 295.266 | 61618-27-7  | -4.788 | -0.252 | -1.315 | -0.16  | -29.213 |
| Duloxetine HCl (Cymbalta)        | 333.875 | 136434-34-9 | -4.788 | -0.228 | -1.808 | -0.25  | -31.748 |

|                                        |         |              |        |        |        |        |         |
|----------------------------------------|---------|--------------|--------|--------|--------|--------|---------|
| Tropisetron HCl                        | 320.814 | 105826-92-4  | -4.788 | -0.228 | -0.95  | -0.194 | -22.577 |
| Liothyronine Sodium                    | 672.955 | 20241        | -4.788 | -0.208 | -1.717 | -0.431 | -38.404 |
| Asunaprevir                            | 748.286 | 630420-16-5  | -4.787 | -0.094 | -1.315 | -0.008 | -59.73  |
| Cholic acid                            | 408.571 | 81-25-4      | -4.786 | -0.165 | -0.62  | -0.392 | -26.763 |
| Hydroquinone                           | 110.111 | 123-31-9     | -4.786 | -0.598 | -0.748 | -0.16  | -13.216 |
| Alogliptin 322-ث SYR                   | 339.392 | 850649-61-5  | -4.781 | -0.191 | -1.19  | -0.16  | -33.764 |
| Alogliptin                             | 339.392 | 850649-61-5  | -4.781 | -0.191 | -1.19  | -0.16  | -33.764 |
| Salmeterol Xinafoate                   | 603.745 | 94749-08-3   | -4.777 | -0.159 | -2.074 | -0.348 | -35.175 |
| Spectinomycin 2HCl                     | 405.271 | 21736-83-4   | -4.775 | -0.208 | -0.404 | -0.495 | -22.997 |
| MDV3100 (Enzalutamide)                 | 464.436 | 915087-33-1  | -4.774 | -0.149 | -0.827 | -0.179 | -44.436 |
| Isoprenaline hydrochloride             | 247.719 | 51-30-9      | -4.773 | -0.318 | -0.778 | -0.147 | -21.78  |
| Amprolium HCl                          | 315.241 | 137-88-2     | -4.773 | -0.265 | -0.612 | -0.16  | -27.41  |
| Dexmedetomidine HCl (Precedex)         | 236.74  | 145108-58-3  | -4.771 | -0.318 | -1.384 | -0.241 | -24.037 |
| Isoconazole nitrate (Travogen)         | 479.141 | 24168-96-5   | -4.77  | -0.191 | -1.374 | -0.316 | -38.7   |
| Vemurafenib (PLX4032, RG7204)          | 489.922 | 918504-65-1  | -4.769 | -0.145 | -1.762 | -0.156 | -44.932 |
| Oxibendazole                           | 249.266 | 20559-55-1   | -4.768 | -0.265 | -0.73  | -0.243 | -30.281 |
| Ixazomib (MLN2238)                     | 361.029 | 1072833-77-2 | -4.765 | -0.207 | -1.161 | -0.144 | -30.212 |
| Nifuroxazide                           | 275.217 | 965-52-6     | -4.765 | -0.238 | -0.785 | -0.505 | -28.69  |
| Biotin (Vitamin B7)                    | 244.311 | 58-85-5      | -4.765 | -0.298 | -0.813 | -0.167 | -25.003 |
| Methazolamide                          | 236.272 | 554-57-4     | -4.762 | -0.34  | -0.317 | -0.16  | -27.389 |
| (-)-Borneol                            | 154.249 | 464-45-9     | -4.761 | -0.433 | -0.904 | -0.16  | -17.525 |
| Fluvastatin sodium (Lescol)            | 433.448 | 93957-55-2   | -4.761 | -0.159 | -1.549 | -0.32  | -33.232 |
| Sodium Picosulfate                     | 481.407 | 10040-45-6   | -4.76  | -0.164 | -1.471 | -0.293 | -26.828 |
| Amiodarone HCl                         | 681.773 | 19774-82-4   | -4.758 | -0.153 | -1.11  | -0.353 | -47.371 |
| Riociguat (BAY 63-2521)                | 422.416 | 625115-55-1  | -4.757 | -0.153 | -1.456 | -0.35  | -37.663 |
| Sulfamerazine                          | 264.304 | 127-79-7     | -4.757 | -0.264 | -0.805 | -0.263 | -29.001 |
| Sulconazole Nitrate                    | 460.762 | 82382-23-8   | -4.755 | -0.198 | -1.284 | -0.294 | -39.157 |
| Vortioxetine (Lu AA21004) hydrobromide | 379.358 | 960203-27-4  | -4.754 | -0.226 | -1.328 | -0.292 | -30.804 |
| Rolipram                               | 275.343 | 61413-54-5   | -4.752 | -0.238 | -1.266 | -0.288 | -26.241 |
| Sulfacetamide Sodium                   | 236.223 | 127-56-0     | -4.751 | -0.339 | -1.308 | -0.323 | -21.928 |
| Pantoprazole (Protonix)                | 383.37  | 102625-70-7  | -4.748 | -0.183 | -0.857 | -0.16  | -34.372 |
| Drostanolone Propionate                | 360.53  | 521-12-0     | -4.747 | -0.183 | -1.38  | -0.258 | -25.967 |
| Aztreonam (Azactam, Cayston)           | 435.433 | 78110-38-0   | -4.747 | -0.17  | -0.687 | -0.009 | -35.966 |
| Pergolide mesylate                     | 410.594 | 66104-23-2   | -4.746 | -0.216 | -1.565 | -0.147 | -29.449 |
| Carboplatin                            | 371.248 | 41575-94-4   | -4.744 | -0.474 | -0.111 | -0.32  | -7.504  |

|                                  |          |                   |        |        |        |        |         |
|----------------------------------|----------|-------------------|--------|--------|--------|--------|---------|
| carbachol                        | 182.649  | 51-83-2           | -4.74  | -0.474 | -0.535 | -0.295 | -9.972  |
| Griseofulvin                     | 352.766  | 126-07-8          | -4.74  | -0.198 | -1.417 | 0      | -36.568 |
| Troxipide                        | 294.346  | 30751-05-4        | -4.74  | -0.226 | -0.858 | -0.451 | -30.082 |
| Fenoprofen calcium               | 522.602  | 34597-40-5        | -4.74  | -0.263 | -1.495 | -0.159 | -23.989 |
| Ambroxol HCl                     | 414.564  | 23828-92-4        | -4.738 | -0.263 | -1.138 | -0.456 | -33.641 |
| Toltrazuril                      | 425.382  | 69004-03-1        | -4.737 | -0.163 | -1.102 | -0.262 | -39.591 |
| Hexylresorcinol                  | 194.27   | 136-77-6          | -4.737 | -0.338 | -1.565 | -0.456 | -21.864 |
| Olmutinib (HM61713, BI 1482694)  | 486.589  | 1353550-13-6      | -4.735 | -0.135 | -1.186 | -0.339 | -45.355 |
| Prothionamide (Prothionamide)    | 180.27   | 14222-60-7        | -4.733 | -0.394 | -0.773 | -0.16  | -20.582 |
| Tianeptine sodium                | 458.934  | 30123-17-2        | -4.729 | -0.163 | -2.063 | -0.16  | -29.46  |
| Tazarotene (Avage)               | 351.462  | 118292-40-3       | -4.729 | -0.189 | -1.618 | -0.258 | -38.333 |
| Ketanserin (Vulkan Gel)          | 395.427  | 74050-98-9        | -4.729 | -0.163 | -1.331 | -0.279 | -38.902 |
| Entacapone                       | 305.286  | 130929-57-6       | -4.727 | -0.215 | -0.372 | -0.261 | -27.192 |
| Triamcinolone (Aristocort)       | 394.434  | 124-94-7          | -4.725 | -0.169 | -0.347 | -0.109 | -18.374 |
| Sulfapyridine (Dagenan)          | 249.289  | 144-83-2          | -4.724 | -0.278 | -0.826 | -0.264 | -26.631 |
| Ziprasidone hydrochloride        | 449.397  | 122883-93-6       | -4.723 | -0.169 | -1.26  | -0.333 | -39.514 |
| Streptozotocin (STZ)             | 265.221  | 18883-66-4        | -4.722 | -0.262 | -0.316 | 0      | -24.417 |
| Ciprofibrate                     | 289.154  | 52214-84-3        | -4.722 | -0.262 | -1.262 | 0      | -26.451 |
| Ruxolitinib (INCB018424)         | 306.365  | 941678-49-5       | -4.722 | -0.205 | -1.137 | -0.477 | -30.133 |
| Carbenicillin disodium           | 422.363  | 4800-94-6         | -4.721 | -0.182 | -0.153 | -0.435 | -19.672 |
| Camphor                          | 152.233  | 76-22-2           | -4.719 | -0.429 | -0.777 | -0.115 | -18.961 |
| Ligustrazine hydrochloride       | 172.655  | 76494-51-4        | -4.719 | -0.472 | -1.026 | -0.137 | -19.762 |
| Rizatriptan Benzoate (Maxalt)    | 391.466  | 145202-66-0       | -4.718 | -0.236 | -0.504 | -0.306 | -27.913 |
| Moguisteine                      | 339.407  | 119637-67-1       | -4.717 | -0.205 | -1.392 | -0.608 | -35.776 |
| Ivabradine HCl (Procoralan)      | 505.046  | 148849-67-6       | -4.716 | -0.139 | -1.65  | -0.24  | -49.684 |
| Vinorelbine Tartrate             | 1079.106 | 125317-39-7       | -4.716 | -0.083 | -1.453 | -0.246 | -48.188 |
| Nikethamide                      | 178.231  | 59-26-7           | -4.714 | -0.363 | -0.887 | -0.163 | -22.822 |
| Vinpocetine (Cavinton)           | 350.454  | 42971-09-5        | -4.714 | -0.181 | -1.382 | -0.053 | -33.57  |
| Granisetron HCl                  | 348.87   | 107007-99-8       | -4.71  | -0.205 | -1.036 | -0.46  | -28.459 |
| Tetramisole HCl                  | 240.752  | 5086-74-8, 5036-1 | -4.71  | -0.336 | -1.355 | 0      | -25.231 |
| Dorzolamide HCl                  | 360.901  | 130693-82-2       | -4.709 | -0.248 | -0.647 | -0.16  | -29.577 |
| Nitazoxanide (Alinia, Annita)    | 307.282  | 55981-09-4        | -4.708 | -0.224 | -0.944 | -0.32  | -36.195 |
| Pemirolast (BMY 26517) potassium | 266.3    | 100299-08-9       | -4.706 | -0.277 | -0.903 | 0      | -29.71  |
| Prucalopride Succinat            | 485.958  | 179474-85-2       | -4.702 | -0.188 | -1.956 | -0.168 | -32.38  |
| Monomethyl auristatin E (MMAE)   | 717.979  | 474645-27-7       | -4.698 | -0.092 | -1.508 | -0.263 | -47.355 |

|                                      |         |             |        |        |        |        |         |
|--------------------------------------|---------|-------------|--------|--------|--------|--------|---------|
| Closantel                            | 663.074 | 57808-65-8  | -4.698 | -0.157 | -1.461 | -0.16  | -47.951 |
| Moexipril HCl                        | 535.029 | 82586-52-5  | -4.698 | -0.13  | -1.55  | -0.32  | -46.689 |
| Synephrine (Oxedrine)                | 167.205 | 34520       | -4.697 | -0.391 | -0.759 | -0.403 | -17.876 |
| Tyrosol                              | 138.164 | 501-94-0    | -4.696 | -0.47  | -1.029 | -0.614 | -15.809 |
| Nitrofurazone (Nitrofuraz)           | 198.136 | 59-87-0     | -4.696 | -0.335 | -0.292 | -0.16  | -24.175 |
| Fluocinonide (Vanos)                 | 494.525 | 356-12-7    | -4.693 | -0.134 | -1.011 | -0.16  | -42.57  |
| Lomitapide Mesylate                  | 789.826 | 202914-84-9 | -4.692 | -0.094 | -1.448 | 0      | -52.476 |
| Lumefantrine                         | 528.94  | 82186-77-4  | -4.691 | -0.134 | -2.13  | -0.16  | -42.683 |
| Lafutidine                           | 431.548 | 118288-08-7 | -4.689 | -0.156 | -2.383 | -0.092 | -41.678 |
| Afloqualone                          | 283.3   | 56287-74-2  | -4.688 | -0.223 | -1.162 | -0.038 | -32.487 |
| Dexamethasone acetate                | 434.498 | 1177-87-3   | -4.687 | -0.151 | -1.005 | -0.239 | -40.46  |
| Penicillin G Sodium                  | 356.372 | 69-57-8     | -4.685 | -0.204 | -0.87  | -0.265 | -29.084 |
| Manidipine (Manyper)                 | 610.699 | 89226-50-6  | -4.684 | -0.104 | -1.483 | -0.092 | -56.602 |
| Manidipine dihydrochloride (CV-4093) | 683.621 | 89226-75-5  | -4.684 | -0.104 | -1.483 | -0.092 | -56.602 |
| Dacarbazine (DTIC-Dome)              | 182.183 | 891986      | -4.683 | -0.36  | -0.443 | -0.315 | -24.381 |
| Galanthamine                         | 287.354 | 357-70-0    | -4.682 | -0.223 | -0.724 | -0.099 | -25.175 |
| Mezlocillin Sodium                   | 561.564 | 42057-22-7  | -4.682 | -0.13  | -0.736 | -0.184 | -50.065 |
| Econazole nitrate (Spectazole)       | 444.696 | 24169-02-6  | -4.681 | -0.195 | -1.218 | -0.296 | -37.867 |
| Nefopam HCl                          | 289.8   | 23327-57-3  | -4.68  | -0.246 | -1.719 | 0      | -25.645 |
| Robenidine Hydrochloride             | 370.664 | 25875-50-7  | -4.676 | -0.213 | -0.993 | -0.16  | -40.559 |
| Clofibric acid                       | 214.646 | 882-09-7    | -4.676 | -0.334 | -1.045 | -0.006 | -24.105 |
| Icotinib                             | 391.42  | 610798-31-7 | -4.674 | -0.161 | -1.523 | -0.031 | -39.508 |
| Desvenlafaxine                       | 263.375 | 93413-62-8  | -4.673 | -0.246 | -1.186 | -0.3   | -24.405 |
| Aripiprazole (Abilify)               | 448.385 | 129722-12-9 | -4.669 | -0.156 | -1.541 | -0.269 | -44.403 |
| Primidone (Mysoline)                 | 218.252 | 125-33-7    | -4.668 | -0.292 | -0.782 | -0.159 | -24.748 |
| Sertaconazole nitrate                | 500.783 | 99592-39-9  | -4.667 | -0.173 | -1.359 | -0.315 | -39.661 |
| Butoconazole nitrate                 | 474.789 | 64872-77-1  | -4.666 | -0.187 | -1.24  | -0.32  | -35.691 |
| Cefpirome sulfate                    | 612.656 | 98753-19-6  | -4.663 | -0.133 | -0.233 | -0.545 | -35.037 |
| Telmisartan (Micardis)               | 514.617 | 144701-48-4 | -4.66  | -0.119 | -1.212 | 0      | -39.719 |
| Diclofenac Diethylamine              | 369.285 | 78213-16-8  | -4.658 | -0.245 | -1.053 | -0.079 | -31.991 |
| Erdosteine                           | 249.307 | 84611-23-4  | -4.658 | -0.311 | -0.445 | -0.584 | -25.215 |
| Umeclidinium bromide                 | 508.49  | 869113-09-7 | -4.657 | -0.146 | -1.487 | 0      | -42.063 |
| Detomidine HCl                       | 222.714 | 90038-01-0  | -4.656 | -0.333 | -1.057 | -0.253 | -21.832 |
| Rosiglitazone HCl                    | 393.888 | 302543-62-0 | -4.652 | -0.186 | -1.092 | -0.241 | -33.23  |
| Rosiglitazone (Avandia)              | 357.427 | 122320-73-4 | -4.651 | -0.186 | -1.092 | -0.241 | -33.227 |

|                                          |         |              |        |        |        |        |         |
|------------------------------------------|---------|--------------|--------|--------|--------|--------|---------|
| Desvenlafaxine Succinate                 | 381.463 | 386750-22-7  | -4.648 | -0.245 | -1.164 | -0.299 | -24.393 |
| Glasdegib (PF-04449913)                  | 374.439 | 1095173-27-5 | -4.648 | -0.166 | -0.971 | -0.32  | -39.433 |
| Naloxone HCl                             | 363.835 | 357-08-4     | -4.647 | -0.194 | -0.958 | -0.15  | -25.54  |
| Parthenolide ((-)-Parthenolide)          | 248.318 | 20554-84-1   | -4.647 | -0.258 | -1.068 | 0      | -26.643 |
| Apatinib mesylate                        | 493.578 | 811803-05-1  | -4.646 | -0.155 | -1.08  | -0.16  | -43.023 |
| Urethane                                 | 89.093  | 51-79-6      | -4.641 | -0.773 | -0.356 | -0.351 | -11.463 |
| Dapson                                   | 248.301 | 80-08-0      | -4.638 | -0.273 | -0.857 | -0.32  | -25.941 |
| Lubiprostone                             | 390.462 | 136790-76-6  | -4.637 | -0.172 | -1.243 | -0.651 | -28.816 |
| Phenazopyridine HCl                      | 249.699 | 136-40-3     | -4.637 | -0.29  | -1.194 | -0.23  | -27.032 |
| Camostat Mesilate (FOY-305)              | 494.518 | 59721-29-8   | -4.634 | -0.16  | -0.932 | -0.569 | -39.666 |
| Roxithromycin (Roxl-150)                 | 837.047 | 80214-83-1   | -4.631 | -0.08  | -0.935 | 0      | -49.613 |
| Sulfameter (Bayrena)                     | 280.303 | 651-06-9     | -4.63  | -0.244 | -0.776 | -0.32  | -29.652 |
| Ursodiol (Actigal Urso)                  | 392.572 | 128-13-2     | -4.629 | -0.165 | -0.414 | -0.283 | -21.834 |
| Celecoxib                                | 381.372 | 169590-42-5  | -4.628 | -0.178 | -1.037 | -0.16  | -31.245 |
| Etofibrate                               | 363.792 | 31637-97-5   | -4.621 | -0.185 | -1.213 | -0.435 | -40.569 |
| Alfuzosin hydrochloride (Uroxatral)      | 425.91  | 81403-68-1   | -4.62  | -0.165 | -0.926 | -0.577 | -41.933 |
| Pralidoxime (chloride)                   | 172.612 | 51-15-0      | -4.619 | -0.462 | -0.73  | -0.16  | -17.204 |
| (+/-)-Sulfinpyrazone                     | 404.481 | 57-96-5      | -4.619 | -0.159 | -1.291 | 0      | -42.068 |
| Nitrofurantoin                           | 238.157 | 67-20-9      | -4.618 | -0.272 | -0.142 | -0.424 | -28.354 |
| Lithocholic acid                         | 376.573 | 434-13-9     | -4.616 | -0.171 | -0.673 | -0.433 | -25.351 |
| Donepezil HCl (Aricept)                  | 415.953 | 120011-70-3  | -4.614 | -0.165 | -1.611 | -0.32  | -36.945 |
| Laquinimod (ABR-215062)                  | 356.803 | 248281-84-7  | -4.613 | -0.185 | -1.607 | -0.031 | -37.275 |
| Cefsulodin sodium                        | 554.528 | 52152-93-9   | -4.613 | -0.128 | -0.486 | -0.32  | -40.701 |
| Ibuprofen Lysine (NeoProfen)             | 352.468 | 57469-77-9   | -4.61  | -0.307 | -1.051 | 0      | -21.094 |
| Sulpiride                                | 341.426 | 15676-16-1   | -4.609 | -0.2   | -1.277 | -0.07  | -34.167 |
| Dasatinib                                | 488.006 | 302962-49-8  | -4.609 | -0.14  | -1.447 | -0.181 | -45.495 |
| Sulbactam sodium (Unasyn)                | 255.223 | 69388-84-7   | -4.606 | -0.307 | -0.239 | -0.077 | -22.443 |
| Acetohydroxamic acid                     | 75.067  | 546-88-3     | -4.605 | -0.921 | -0.115 | -0.294 | -11.448 |
| Cyproheptadine hydrochloride (Periactin) | 323.859 | 969-33-5     | -4.603 | -0.209 | -1.636 | 0      | -28.349 |
| Gliquidone                               | 527.632 | 33342-05-1   | -4.6   | -0.124 | -1.456 | 0      | -46.687 |
| Tanshinone IIA (Tanshinone B)            | 294.344 | 568-72-9     | -4.599 | -0.209 | -0.58  | -0.438 | -29.567 |
| Levosulpiride (Levogastrol)              | 341.426 | 23672-07-3   | -4.599 | -0.2   | -0.846 | -0.167 | -33.318 |
| Betamethasone (Celestone)                | 392.461 | 378-44-9     | -4.598 | -0.164 | -1.026 | 0      | -28.689 |
| Rivaroxaban (Xarelto)                    | 435.881 | 366789-02-8  | -4.598 | -0.159 | -1.406 | -0.368 | -39.214 |
| Quinapril hydrochloride (Accupril)       | 474.977 | 82586-55-8   | -4.596 | -0.144 | -1.507 | -0.024 | -39.737 |

|                                           |         |                  |        |        |        |        |         |
|-------------------------------------------|---------|------------------|--------|--------|--------|--------|---------|
| Prucalopride                              | 367.87  | 179474-81-8      | -4.595 | -0.184 | -1.584 | -0.373 | -32.653 |
| oxethazaine                               | 467.643 | 126-27-2         | -4.593 | -0.135 | -1.749 | -0.176 | -41.8   |
| Pioglitazone (Actos)                      | 356.439 | 111025-46-8      | -4.592 | -0.184 | -1.217 | -0.262 | -32.061 |
| Brexpiprazole                             | 433.566 | 913611-97-9      | -4.592 | -0.148 | -1.459 | -0.021 | -49.588 |
| Sulfamethoxypyridazine                    | 280.303 | 80-35-3          | -4.592 | -0.242 | -1.161 | -0.095 | -30.193 |
| Sumatriptan succinate                     | 413.488 | 103628-48-4      | -4.591 | -0.23  | -0.348 | -0.443 | -29.485 |
| Nilvadipine (ARC029)                      | 385.371 | 75530-68-6       | -4.59  | -0.164 | -0.847 | -0.009 | -35.994 |
| Tofacitinib citrate (CP-690550 citrate)   | 504.493 | 540737-29-9      | -4.589 | -0.2   | -0.722 | -0.174 | -31.93  |
| Tofacitinib (CP-690550, Tasocitinib)      | 312.37  | 477600-75-2      | -4.589 | -0.2   | -0.722 | -0.174 | -31.93  |
| Penicillamine (Cuprimine)                 | 149.211 | 52-67-5          | -4.588 | -0.51  | -0.528 | -0.291 | -16.022 |
| MPEP                                      | 193.244 | 96206-92-7       | -4.587 | -0.306 | -2.018 | 0      | -24.7   |
| mepenzolate bromide                       | 420.34  | 76-90-4          | -4.585 | -0.183 | -0.712 | -0.11  | -30.596 |
| Lomerizine 2HCl                           | 541.457 | 101477-54-7, 101 | -4.585 | -0.135 | -1.35  | -0.32  | -40.529 |
| Pioglitazone hydrochloride (Actos)        | 392.9   | 112529-15-4      | -4.578 | -0.183 | -1.219 | -0.23  | -31.813 |
| Gatifloxacin                              | 375.394 | 112811-59-3      | -4.567 | -0.169 | -1.396 | -0.01  | -37.405 |
| Benzyl benzoate                           | 212.244 | 120-51-4         | -4.564 | -0.285 | -1.264 | -0.203 | -27.005 |
| Rotenone (Barbasco)                       | 394.417 | 83-79-4          | -4.561 | -0.157 | -1.78  | 0      | -35.785 |
| Febuxostat (Uloric)                       | 316.375 | 144060-53-7      | -4.554 | -0.207 | -1.056 | -0.145 | -30.591 |
| Trifluoperazine 2HCl                      | 480.417 | 440-17-5         | -4.554 | -0.163 | -1.84  | 0      | -39.182 |
| Levosimendan                              | 280.285 | 141505-33-1      | -4.55  | -0.217 | -0.41  | -0.78  | -33.058 |
| Phenylephrine hydrochloride               | 203.666 | 61-76-7          | -4.548 | -0.379 | -0.535 | -0.325 | -16.635 |
| Olsalazine Sodium                         | 346.203 | 6054-98-4        | -4.545 | -0.207 | -0.062 | -0.388 | -21.757 |
| Miconazole nitrate                        | 479.141 | 22832-87-7       | -4.541 | -0.182 | -1.239 | -0.304 | -39.214 |
| Flupirtine maleate                        | 420.392 | 75507-68-5       | -4.541 | -0.206 | -1.56  | -0.19  | -35.184 |
| Methacycline hydrochloride (Physiomycine) | 478.88  | 3963-95-9        | -4.54  | -0.142 | -1.03  | -0.141 | -35.416 |
| Dacomitinib (PF299804, PF-00299804)       | 469.939 | 1110813-31-4     | -4.54  | -0.138 | -1.579 | -0.101 | -43.303 |
| AMG-073 HCl (Cinacalcet hydrochloride)    | 393.873 | 364782-34-3      | -4.539 | -0.175 | -1.547 | -0.305 | -35.261 |
| Lathyrol                                  | 334.45  | 34420-19-4       | -4.538 | -0.189 | -0.696 | 0      | -32.93  |
| Rosiglitazone maleate                     | 473.499 | 155141-29-0      | -4.535 | -0.181 | -0.986 | -0.281 | -39.485 |
| D-(+)-Trehalose dihydrate                 | 378.327 | 6138-23-4        | -4.534 | -0.197 | -0.356 | 0      | -22.194 |
| Dabrafenib (GSK2118436)                   | 519.562 | 1195765-45-7     | -4.534 | -0.13  | -0.682 | -0.372 | -44.323 |
| Betaxolol hydrochloride (Betoptic)        | 343.889 | 63659-19-8       | -4.533 | -0.206 | -1.72  | -0.29  | -30.129 |
| Dienogest                                 | 311.418 | 65928-58-7       | -4.533 | -0.197 | -0.785 | -0.156 | -33.23  |
| pentoxifylline                            | 278.307 | 1677687          | -4.532 | -0.227 | -0.534 | -0.246 | -31.711 |
| MetoclopraMide HCl                        | 336.257 | 7232-21-5        | -4.532 | -0.227 | -1.142 | -0.607 | -31.056 |

|                                  |         |                  |        |        |        |        |         |
|----------------------------------|---------|------------------|--------|--------|--------|--------|---------|
| Tazobactam                       | 300.291 | 89786-04-9, 8978 | -4.532 | -0.227 | -0.132 | 0      | -26.884 |
| glafenine hydrochloride          | 409.263 | 65513-72-6       | -4.529 | -0.174 | -1.503 | -0.072 | -37.717 |
| Metronidazole (Flagyl)           | 171.154 | 443-48-1         | -4.528 | -0.377 | -0.333 | -0.265 | -20.556 |
| Zafirlukast (Accolate)           | 575.675 | 107753-78-6      | -4.528 | -0.11  | -1.373 | 0      | -49.941 |
| Chlorobutanol                    | 177.457 | 57-15-8          | -4.528 | -0.566 | -0.711 | -0.16  | -16.098 |
| Nortriptyline hydrochloride      | 299.838 | 894-71-3         | -4.527 | -0.226 | -0.808 | -0.441 | -28.801 |
| Promestriene                     | 328.488 | 39219-28-8       | -4.525 | -0.189 | -1.9   | 0      | -30.735 |
| Saxagliptin (BMS-477118,Onglyza) | 315.41  | 361442-04-8      | -4.524 | -0.197 | -1.244 | -0.259 | -34.185 |
| Belinostat (PXD101)              | 318.348 | 414864-00-9      | -4.522 | -0.206 | -0.526 | -0.373 | -33.09  |
| lloperidone (Fanapt)             | 426.481 | 133454-47-4      | -4.522 | -0.146 | -1.316 | 0      | -41.137 |
| Fenofibrate (Tricor, Trilipix)   | 360.831 | 49562-28-9       | -4.52  | -0.181 | -1.655 | -0.209 | -38.613 |
| Lesinurad                        | 404.281 | 878672-00-5      | -4.52  | -0.188 | -0.725 | -0.229 | -36.645 |
| Piperine (1-Piperoylpiperidine)  | 285.338 | 94-62-2          | -4.514 | -0.215 | -0.901 | -0.32  | -29.412 |
| Racecadotril (Acetorphan)        | 385.477 | 81110-73-8       | -4.511 | -0.167 | -0.391 | -0.678 | -36.672 |
| terfenadine                      | 471.673 | 50679-08-8       | -4.511 | -0.129 | -1.8   | -0.386 | -33.329 |
| Cefazolin Sodium                 | 476.489 | 27164-46-1       | -4.511 | -0.156 | -1.107 | -0.136 | -46.904 |
| Pancuronium dibromide            | 732.67  | 15500-66-0       | -4.51  | -0.11  | -1.755 | 0      | -34.759 |
| Ulipristal acetate               | 475.619 | 126784-99-4      | -4.505 | -0.129 | -1.451 | -0.309 | -34.404 |
| Amlodipine besylate (Norvasc)    | 567.051 | 111470-99-6      | -4.503 | -0.161 | -1.197 | -0.602 | -36.951 |
| Tenofovir Alafenamide (GS-7340)  | 476.466 | 379270-37-8      | -4.501 | -0.136 | -0.667 | -0.309 | -46.851 |
| Trichlormethiazide (Achletin)    | 380.656 | 133-67-5         | -4.5   | -0.225 | -0.51  | -0.16  | -30.141 |
| Xylazine HCl                     | 256.795 | 23076-35-9       | -4.499 | -0.3   | -1.032 | -0.16  | -24.491 |
| Cinnamic acid                    | 148.159 | 140-10-3         | -4.499 | -0.409 | -0.416 | -0.243 | -18.485 |
| Ethopabate                       | 237.252 | 21704            | -4.498 | -0.265 | -0.657 | -0.374 | -25.604 |
| Butenafine HCl                   | 353.928 | 101827-46-7      | -4.495 | -0.187 | -1.593 | 0      | -37.847 |
| Mevastatin                       | 390.513 | 73573-88-3       | -4.493 | -0.16  | -1.651 | -0.409 | -35.777 |
| Miconazole (Monistat)            | 416.129 | 22916-47-8       | -4.493 | -0.18  | -1.171 | -0.307 | -39.422 |
| Dasatinib Monohydrate            | 506.021 | 863127-77-9      | -4.492 | -0.136 | -1.351 | -0.162 | -38.794 |
| Vitamin C (Ascorbic acid)        | 176.124 | 50-81-7          | -4.492 | -0.374 | -0.323 | 0      | -15.532 |
| Amoxapine                        | 313.781 | 14028-44-5       | -4.489 | -0.204 | -0.889 | -0.178 | -30.721 |
| Ospemifene                       | 378.891 | 128607-22-7      | -4.488 | -0.166 | -1.774 | -0.32  | -32.361 |
| Cefonicid sodium                 | 586.53  | 61270-78-8       | -4.487 | -0.128 | -0.743 | -0.284 | -40.416 |
| Ozagrel HCl                      | 264.708 | 78712-43-3       | -4.486 | -0.264 | -1.058 | -0.157 | -22.509 |
| Ranolazine dihydrochloride       | 500.458 | 95635-56-6       | -4.486 | -0.145 | -1.495 | -0.456 | -41.581 |
| Reserpine                        | 608.679 | 50-55-5          | -4.484 | -0.102 | -1.637 | 0      | -47.618 |



|                                    |         |             |        |        |        |        |         |
|------------------------------------|---------|-------------|--------|--------|--------|--------|---------|
| Almotriptan malate (Axert)         | 469.552 | 181183-52-8 | -4.483 | -0.195 | -1.608 | 0      | -33.276 |
| Parecoxib                          | 370.422 | 198470-84-7 | -4.481 | -0.172 | -1.501 | -0.018 | -39.268 |
| Raltegravir (MK-0518)              | 444.416 | 518048-05-0 | -4.481 | -0.14  | -0.814 | -0.3   | -43.373 |
| Irinotecan HCl Trihydrate (Campto) | 677.185 | 136572-09-3 | -4.479 | -0.104 | -1.132 | -0.165 | -46.563 |
| Salicylanilide                     | 213.232 | 87-17-2     | -4.477 | -0.28  | -1.008 | -0.192 | -24.944 |
| Trazodone hydrochloride (Desyrel)  | 408.325 | 25332-39-2  | -4.477 | -0.172 | -1.091 | 0      | -37.223 |
| Desonide                           | 416.507 | 638-94-8    | -4.474 | -0.149 | -0.839 | -0.152 | -28.855 |
| Urapidil hydrochloride             | 423.937 | 64887-14-5  | -4.473 | -0.16  | -0.725 | -0.142 | -41.012 |
| Eletriptan HBr                     | 463.431 | 177834-92-3 | -4.473 | -0.166 | -1.536 | -0.084 | -38.053 |
| Carbimazole                        | 186.232 | 22232-54-8  | -4.473 | -0.373 | -0.283 | -0.28  | -28.972 |
| Caryophyllene oxide                | 220.35  | 1139-30-6   | -4.472 | -0.28  | -1.477 | 0      | -20.868 |
| Hydroxyurea (Cytodrox)             | 76.055  | 127-07-1    | -4.472 | -0.894 | 0      | -0.292 | -11.358 |
| Clozapine (Clozaril)               | 326.823 | 5786-21-0   | -4.469 | -0.194 | -1.227 | -0.09  | -34.73  |
| Meclofenoxate (Centropheoxine) HCl | 294.174 | 3685-84-5   | -4.468 | -0.263 | -0.717 | -0.754 | -25.202 |
| Bisacodyl                          | 361.391 | 30652-11-0  | -4.465 | -0.165 | -1.201 | -0.267 | -36.117 |
| Etomidate                          | 244.289 | 33125-97-2  | -4.465 | -0.248 | -1.738 | 0      | -33.285 |
| Pravastatin sodium                 | 446.51  | 81131-70-6  | -4.461 | -0.149 | -0.943 | -0.304 | -28.51  |
| Sildenafil citrate                 | 666.7   | 171599-83-0 | -4.461 | -0.135 | -1.654 | 0      | -43.736 |
| Secnidazole (Flagentyl)            | 185.181 | 3366-95-8   | -4.459 | -0.343 | -0.389 | -0.253 | -21.36  |
| Glycopyrrolate                     | 398.335 | 596-51-0    | -4.457 | -0.194 | -0.702 | -0.199 | -29.113 |
| Andrographolide                    | 350.449 | 5508-58-7   | -4.457 | -0.178 | -0.782 | 0      | -18.758 |
| Ozagrel                            | 228.247 | 82571-53-7  | -4.457 | -0.262 | -1.048 | -0.156 | -22.648 |
| Cefotiam hydrochloride             | 598.55  | 66309-69-1  | -4.455 | -0.131 | -0.819 | -0.088 | -45.731 |
| bephenium hydroxynaphthoate        | 443.534 | 3818-50-6   | -4.453 | -0.234 | -1.418 | -0.243 | -24.867 |
| Ibuprofen (Advil)                  | 206.281 | 15687-27-1  | -4.452 | -0.297 | -1.183 | 0      | -22.365 |
| Aceglutamide                       | 188.181 | 2490-97-3   | -4.448 | -0.342 | -0.372 | -0.488 | -21.545 |
| Perphenazine                       | 403.969 | 58-39-9     | -4.443 | -0.165 | -1.163 | -0.16  | -30.719 |
| Pramipexole (Mirapex)              | 211.327 | 104632-26-0 | -4.441 | -0.317 | -0.966 | -0.304 | -20.705 |
| Estradiol Cypionate                | 396.562 | 313-06-4    | -4.437 | -0.153 | -1.471 | -0.32  | -32.838 |
| Azatadine dimaleate                | 522.546 | 3978-86-7   | -4.435 | -0.202 | -1.096 | 0      | -25.037 |
| Oxyclozanide                       | 401.457 | 2277-92-1   | -4.435 | -0.202 | -1.27  | -0.249 | -35.891 |
| Flumethasone                       | 410.452 | 2135-17-3   | -4.431 | -0.153 | -0.721 | -0.152 | -26.235 |
| Chlorpromazine HCl                 | 355.325 | 69-09-0     | -4.431 | -0.211 | -1.335 | 0      | -33.659 |
| Moclobemide (Ro 111163)            | 268.739 | 71320-77-9  | -4.428 | -0.246 | -1.478 | 0      | -27.439 |
| Mexiletine HCl                     | 215.72  | 1267397     | -4.427 | -0.341 | -1.122 | -0.304 | -16.644 |

|                               |         |              |        |        |        |        |         |
|-------------------------------|---------|--------------|--------|--------|--------|--------|---------|
| Homatropine Bromide           | 356.255 | 51-56-9      | -4.424 | -0.221 | -1.047 | -0.012 | -27.272 |
| Suplatast tosylate            | 499.641 | 94055-76-2   | -4.423 | -0.201 | -1.371 | -0.32  | -26.974 |
| Trimetazidine dihydrochloride | 339.258 | 13171-25-0   | -4.422 | -0.233 | -1.065 | -0.107 | -27.967 |
| Thioctic acid                 | 206.326 | 1077-28-7    | -4.419 | -0.368 | -1.144 | -0.153 | -20.962 |
| Hyodeoxycholic acid (HDCA)    | 392.572 | 83-49-8      | -4.416 | -0.158 | -0.389 | -0.401 | -26.351 |
| Pizotifen malate              | 429.529 | 1201595      | -4.414 | -0.21  | -1.545 | 0      | -27.822 |
| Hyoscyamine (Daturine)        | 289.369 | 101-31-5     | -4.41  | -0.21  | -1.353 | 0      | -28.035 |
| Letrozole                     | 285.303 | 112809-51-5  | -4.409 | -0.2   | -0.619 | -0.149 | -32.845 |
| Vandetanib (ZD6474)           | 475.354 | 443913-73-3  | -4.408 | -0.147 | -1.312 | -0.376 | -36.803 |
| Propantheline bromide         | 448.393 | 50-34-0      | -4.406 | -0.163 | -1.156 | -0.31  | -32.192 |
| Telaprevir (VX-950)           | 679.849 | 402957-28-2  | -4.399 | -0.09  | -0.971 | -0.096 | -55.281 |
| Mometasone furoate            | 521.429 | 83919-23-7   | -4.398 | -0.126 | -1.212 | -0.249 | -37.377 |
| Carfilzomib (PR-171)          | 719.91  | 868540-17-4  | -4.396 | -0.085 | -1.528 | 0      | -54.006 |
| Chlorotrianisene              | 380.864 | 569-57-3     | -4.394 | -0.163 | -1.784 | -0.07  | -35.751 |
| Betulin                       | 442.717 | 473-98-3     | -4.393 | -0.137 | -1.607 | -0.471 | -26.634 |
| Drospirenone                  | 366.493 | 67392-87-4   | -4.389 | -0.163 | -1.178 | 0      | -36.911 |
| Iron sucrose                  | 736.059 | 8047-67-4    | -4.387 | -0.313 | -0.482 | -0.212 | -14.281 |
| Protopine                     | 353.369 | 130-86-9     | -4.387 | -0.169 | -1.191 | 0      | -31.297 |
| Thioridazine hydrochloride    | 407.035 | 130-61-0     | -4.386 | -0.175 | -1.576 | 0      | -37.391 |
| Nifedipine (Adalat)           | 346.335 | 21829-25-4   | -4.386 | -0.175 | -1.059 | 0      | -37.574 |
| Repaglinide                   | 452.586 | 135062-02-1  | -4.386 | -0.133 | -0.918 | -0.277 | -42.416 |
| Gliclazide (Diamicon)         | 323.411 | 21187-98-4   | -4.385 | -0.199 | -1.243 | -0.304 | -26.627 |
| Levamlodipine                 | 408.876 | 103129-82-4  | -4.385 | -0.157 | -1.552 | -0.322 | -38.582 |
| Vorapaxar (SCH 530348)        | 492.582 | 618385-01-6  | -4.384 | -0.122 | -1.192 | -0.243 | -43.563 |
| Sivelestat (ONO-5046)         | 434.463 | 127373-66-4  | -4.383 | -0.146 | -1.164 | 0      | -34.33  |
| Macitentan                    | 588.273 | 441798-33-0  | -4.383 | -0.137 | -0.88  | -0.16  | -49.529 |
| Cidofovir (Vistide)           | 279.187 | 113852-37-2  | -4.38  | -0.243 | -0.541 | -0.478 | -25.11  |
| Benzethonium chloride         | 448.081 | 121-54-0     | -4.379 | -0.146 | -2.19  | 0      | -33.443 |
| Misoprostol                   | 382.534 | 59122-46-2   | -4.379 | -0.162 | -1.625 | -0.751 | -31.025 |
| Clindamycin palmitate HCl     | 699.853 | 25507-04-4   | -4.376 | -0.099 | -1.443 | -0.065 | -50.788 |
| Grazoprevir                   | 766.903 | 1350514-68-9 | -4.373 | -0.081 | -0.911 | 0      | -47.633 |
| Maprotiline hydrochloride     | 313.864 | 10347-81-6   | -4.369 | -0.208 | -1.201 | -0.289 | -26.69  |
| Oxaprozin                     | 293.317 | 21256-18-8   | -4.367 | -0.199 | -0.943 | -0.052 | -30.135 |
| Betamipron                    | 193.199 | 3440-28-6    | -4.367 | -0.312 | -0.901 | -0.178 | -21.951 |
| Nateglinide (Starlix)         | 317.423 | 105816-04-4  | -4.364 | -0.19  | -0.753 | -0.361 | -25.875 |

|                                    |          |              |        |        |        |        |         |
|------------------------------------|----------|--------------|--------|--------|--------|--------|---------|
| Dexlansoprazole                    | 369.361  | 138530-94-6  | -4.361 | -0.174 | -0.449 | -0.16  | -33.504 |
| Eliglustat (Tartrate)              | 404.543  | 491833-29-5  | -4.361 | -0.15  | -1.198 | -0.456 | -39.426 |
| Dapagliflozin                      | 408.873  | 461432-26-8  | -4.36  | -0.156 | -1.042 | 0      | -29.818 |
| Closantel Sodium                   | 685.056  | 61438-64-0   | -4.359 | -0.145 | -1.484 | -0.297 | -39.77  |
| Flunarizine 2HCl                   | 477.417  | 30484-77-6   | -4.357 | -0.145 | -1.259 | -0.008 | -35.594 |
| (+)-L-α-Lipoic acid                | 206.326  | 1200-22-2    | -4.354 | -0.363 | -1.097 | 0      | -20.97  |
| Cefotaxime sodium                  | 477.447  | 64485-93-4   | -4.35  | -0.145 | -0.853 | -0.518 | -45.499 |
| L-carnitine (Levocarnitine)        | 161.199  | 541-15-1     | -4.347 | -0.395 | -0.538 | -0.16  | -13.713 |
| Erlotinib                          | 393.436  | 183321-74-6  | -4.346 | -0.15  | -1.78  | -0.045 | -42.161 |
| Fingolimod (FTY720) HCl            | 343.932  |              | -4.343 | -0.197 | -1.647 | -0.144 | -25.002 |
| Fumagillin                         | 458.544  | 23110-15-8   | -4.342 | -0.132 | -1.198 | -0.251 | -34.296 |
| Buflomedil HCl                     | 343.846  | 35543-24-9   | -4.338 | -0.197 | -1.196 | -0.32  | -31.408 |
| Ethynodiol diacetate               | 384.508  | 297-76-7     | -4.338 | -0.155 | -1.323 | -0.02  | -39.301 |
| Mitomycin C                        | 334.327  |              |        |        |        |        |         |
| Tiotropium Bromide hydrate         | 490.432  | 139404-48-1  | -4.336 | -0.167 | -1.002 | 0      | -32.071 |
| Atorvastatin calcium (Lipitor)     | 1155.342 | 134523-03-8  | -4.329 | -0.106 | -1.46  | -0.48  | -42.355 |
| Dapoxetine hydrochloride (Priligy) | 341.874  | 129938-20-1  | -4.329 | -0.188 | -1.615 | 0      | -30.797 |
| Nimodipine (Nimotop)               | 418.44   | 66085-59-4   | -4.328 | -0.144 | -0.889 | -0.32  | -40.344 |
| Arecoline HBr                      | 236.106  | 300-08-3     | -4.327 | -0.393 | -0.706 | -0.32  | -19.162 |
| Levothyroxine sodium               | 798.852  | 20156        | -4.327 | -0.18  | -1.336 | -0.48  | -39.207 |
| Dexamethasone Sodium Phosphate     | 516.405  | 55203-24-2   | -4.321 | -0.135 | -1.066 | -0.581 | -27.945 |
| Ramipril (Altace)                  | 416.511  | 87333-19-5   | -4.321 | -0.144 | -1.023 | -0.41  | -38.874 |
| Enzastaurin (LY317615)             | 515.605  | 170364-57-5  | -4.32  | -0.111 | -1.245 | 0      | -49.519 |
| Kanamycin sulfate                  | 582.577  | 25389-94-0   | -4.317 | -0.131 | -0.463 | -0.261 | -31.735 |
| Clotrimazole (Canesten)            | 344.837  | 23593-75-1   | -4.314 | -0.173 | -1.093 | -0.268 | -29.187 |
| Atazanavir sulfate                 | 802.934  | 229975-97-7  | -4.314 | -0.085 | -1.461 | -0.296 | -49.988 |
| Safinamide Mesylate (FCE28073)     | 398.449  | 202825-46-5  | -4.314 | -0.196 | -1.387 | -0.235 | -29.171 |
| Estradiol Benzoate                 | 376.488  | 50-50-0      | -4.31  | -0.154 | -1.063 | -0.1   | -38.125 |
| Mianserin HCl                      | 300.826  | 21535-47-7   | -4.308 | -0.215 | -0.966 | 0      | -28.091 |
| Quinacrine 2HCl                    | 472.879  | 25329        | -4.308 | -0.154 | -1.229 | -0.513 | -34.098 |
| Bepotastine Besilate               | 547.063  | 190786-44-8  | -4.304 | -0.159 | -1.085 | -0.016 | -34.654 |
| Tolnaftate                         | 307.409  | 2398-96-1    | -4.303 | -0.196 | -1.413 | 0      | -31.541 |
| Triclosan                          | 289.542  | 3380-34-5    | -4.302 | -0.253 | -1.077 | 0      | -27.299 |
| abemaciclib (LY2835219)            | 602.699  | 1231930-82-7 | -4.3   | -0.116 | -1.575 | 0      | -43.262 |
| Mirtazapine (Remeron, Avanza)      | 265.353  | 85650-52-8   | -4.299 | -0.215 | -0.92  | 0      | -28.599 |

|                                        |         |              |        |        |        |        |         |
|----------------------------------------|---------|--------------|--------|--------|--------|--------|---------|
| Betamethasone Dipropionate (Diprolene) | 504.588 | 5593-20-4    | -4.297 | -0.119 | -1.106 | -0.456 | -38.212 |
| Aprepitant (MK-0869)                   | 534.427 | 170729-80-3  | -4.297 | -0.116 | -0.552 | -0.258 | -42.865 |
| Moxonidine                             | 241.677 | 75438-57-2   | -4.297 | -0.269 | -0.825 | -0.16  | -27.559 |
| Nelfinavir Mesylate                    | 663.888 | 159989-65-8  | -4.296 | -0.107 | -1.33  | -0.306 | -45.049 |
| Dexamethasone                          | 392.461 | 18296        | -4.294 | -0.153 | -0.768 | -0.152 | -26.719 |
| Propranolol HCl                        | 295.804 | 318-98-9     | -4.293 | -0.226 | -1.186 | 0      | -27.788 |
| Nicardipine HCl                        | 515.986 | 54527-84-3   | -4.292 | -0.123 | -0.93  | -0.32  | -48.649 |
| Eugenol                                | 164.201 | 97-53-0      | -4.292 | -0.358 | -1.281 | -0.168 | -21.936 |
| Sinomenine hydrochloride               | 365.851 | 6080-33-7    | -4.29  | -0.179 | -0.894 | -0.138 | -31.039 |
| Tanshinone IIA sulfonate (sodium)      | 396.389 | 69659-80-9   | -4.289 | -0.165 | -1.166 | -0.312 | -28.66  |
| Chloroquine Phosphate                  | 515.863 | 50-63-5      | -4.289 | -0.195 | -1.806 | 0      | -34.954 |
| Deoxycholic acid                       | 392.572 | 83-44-3      | -4.288 | -0.153 | -0.448 | -0.259 | -27.941 |
| BAF312 (Siponimod)                     | 516.595 | 1230487-00-9 | -4.288 | -0.116 | -1.227 | -0.063 | -40.376 |
| Pitavastatin calcium (Livalo)          | 880.984 | 147526-32-7  | -4.284 | -0.138 | -1.118 | -0.311 | -36.292 |
| Phenacetin                             | 179.216 | 62-44-2      | -4.282 | -0.329 | -0.663 | -0.374 | -21.439 |
| Methenamine (Mandelamine)              | 140.186 | 100-97-0     | -4.279 | -0.428 | 0      | 0      | -18.308 |
| Darifenacin HBr                        | 507.462 | 133099-07-7  | -4.275 | -0.134 | -1.533 | 0      | -41.631 |
| Ivacaftor (VX-770)                     | 392.491 | 873054-44-5  | -4.273 | -0.147 | -0.866 | -0.274 | -35.836 |
| Balsalazide disodium                   | 437.312 | 150399-21-6  | -4.273 | -0.164 | -0.368 | -0.4   | -22.833 |
| Estradiol valerate                     | 356.498 | 979-32-8     | -4.271 | -0.164 | -1.248 | -0.39  | -27.011 |
| Cyclobenzaprine HCl                    | 311.848 | 6202-23-9    | -4.27  | -0.203 | -1.455 | 0      | -27.853 |
| Verapamil HCl                          | 491.063 | 152-11-4     | -4.269 | -0.129 | -1.579 | -0.331 | -40.021 |
| Busulfan (Myleran, Busulfex)           | 246.302 | 55-98-1      | -4.266 | -0.305 | -1.082 | 0      | -25.398 |
| Rimonabant (SR141716)                  | 463.787 | 168273-06-1  | -4.263 | -0.142 | -1.196 | -0.257 | -40.154 |
| Cobimetinib (GDC-0973, RG7420)         | 531.31  | 934660-93-2  | -4.263 | -0.142 | -1.25  | -0.16  | -38.899 |
| Finasteride                            | 372.544 | 98319-26-7   | -4.26  | -0.158 | -0.995 | 0      | -40.603 |
| Tiagabine hydrochloride                | 412.009 | 145821-59-6  | -4.259 | -0.17  | -1.497 | 0      | -33.588 |
| 4-Methylbenzylidene camphor            | 254.367 | 36861-47-9   | -4.259 | -0.224 | -1.43  | 0      | -25.296 |
| L-Cysteine HCl                         | 157.619 | 52-89-1      | -4.258 | -0.608 | -0.212 | -0.695 | -12.908 |
| Nisoldipine                            | 388.414 | 63675-72-9   | -4.257 | -0.152 | -1.152 | -0.154 | -37.225 |
| Benidipine hydrochloride               | 542.023 | 91599-74-5   | -4.257 | -0.115 | -1.467 | 0      | -56.119 |
| Amitriptyline HCl                      | 313.864 | 549-18-8     | -4.256 | -0.203 | -1.288 | -0.149 | -28.097 |
| Flavoxate HCl                          | 427.921 | 3717-88-2    | -4.256 | -0.147 | -1.386 | -0.332 | -39.665 |
| Perindopril Erbumine (Aceon)           | 441.605 | 107133-36-8  | -4.252 | -0.164 | -0.993 | -0.158 | -33.664 |
| Glipizide (Glucotrol)                  | 445.535 | 29094-61-9   | -4.248 | -0.137 | -0.588 | -0.573 | -43.156 |

|                                         |         |              |        |        |        |        |         |
|-----------------------------------------|---------|--------------|--------|--------|--------|--------|---------|
| Triamcinolone Acetonide                 | 434.498 | 76-25-5      | -4.248 | -0.137 | -0.703 | -0.16  | -29.088 |
| Ampiroxicam                             | 447.462 | 99464-64-9   | -4.246 | -0.137 | -0.934 | -0.01  | -41.903 |
| Artemisinin                             | 282.332 | 63968-64-9   | -4.246 | -0.212 | -1.055 | 0      | -29.775 |
| Vildagliptin (LAF-237)                  | 303.399 | 274901-16-5  | -4.245 | -0.193 | -0.966 | -0.317 | -27.468 |
| Iproniazid                              | 179.219 | 54-92-2      | -4.243 | -0.326 | -0.695 | -0.341 | -25.086 |
| Fenticonazole nitrate                   | 518.412 | 73151-29-8   | -4.24  | -0.141 | -2.07  | 0      | -44.394 |
| Idebenone                               | 338.438 | 58186-27-9   | -4.239 | -0.177 | -1.629 | -0.275 | -29.972 |
| Buspirone hydrochloride                 | 421.964 | 33386-08-2   | -4.236 | -0.151 | -0.902 | -0.319 | -33.729 |
| Efaproxiral sodium                      | 363.383 | 170787-99-2  | -4.235 | -0.169 | -0.858 | -0.52  | -25.817 |
| Bosutinib (SKI-606)                     | 530.446 | 380843-75-4  | -4.235 | -0.118 | -1.183 | -0.24  | -46.16  |
| Maraviroc                               | 513.666 | 376348-65-1  | -4.233 | -0.114 | -0.888 | 0      | -42.913 |
| Guanidine (Aminoformamidine) HCl        | 95.531  | 18264        | -4.226 | -1.056 | 0      | -0.281 | -8.916  |
| Fluoxetine HCl                          | 345.787 | 56296-78-7   | -4.224 | -0.192 | -1.372 | -0.16  | -27.502 |
| Halcinonide                             | 454.959 | 3093-35-4    | -4.221 | -0.136 | -0.752 | -0.16  | -30.036 |
| Cilostazol                              | 369.461 | 73963-72-1   | -4.22  | -0.156 | -0.87  | -0.16  | -39.046 |
| Lovastatin (Mevacor)                    | 404.54  | 75330-75-5   | -4.22  | -0.146 | -1.211 | -0.445 | -34.272 |
| Venlafaxine HCl                         | 313.863 | 99300-78-4   | -4.219 | -0.211 | -0.746 | -0.16  | -23.908 |
| Nizatidine                              | 331.457 | 76963-41-2   | -4.219 | -0.201 | -0.874 | -0.513 | -35.39  |
| Cyclandelate                            | 276.371 | 456-59-7     | -4.218 | -0.211 | -1.234 | 0      | -32.792 |
| Gefitinib (ZD1839)                      | 446.902 | 184475-35-2  | -4.218 | -0.136 | -1.566 | -0.001 | -42.293 |
| Phenoxybenzamine HCl                    | 340.287 | 63-92-3      | -4.217 | -0.201 | -1.487 | -0.32  | -30.6   |
| Sarpogrelate hydrochloride              | 465.967 | 135159-51-2  | -4.217 | -0.136 | -0.93  | -0.344 | -40.748 |
| Pramipexole dihydrochloride monohydrate | 302.264 | 191217-81-9  | -4.216 | -0.301 | -0.694 | -0.343 | -21.01  |
| Diltiazem HCl                           | 450.979 | 33286-22-5   | -4.214 | -0.145 | -1.475 | -0.232 | -38.984 |
| Vonoprazan Fumarate (TAK-438)           | 461.463 | 1260141-27-2 | -4.214 | -0.176 | -0.938 | -0.04  | -35.127 |
| Bezafibrate                             | 361.819 | 41859-67-0   | -4.214 | -0.169 | -0.942 | -0.187 | -31.621 |
| L-Thyroxine                             | 776.87  | 51-48-9      | -4.211 | -0.175 | -0.733 | -0.152 | -35.074 |
| Cyproheptadine hydrochloride            | 323.859 | 41354-29-4   | -4.21  | -0.191 | -1.277 | 0      | -27.8   |
| Betahistine 2HCl                        | 209.116 | 5579-84-0    | -4.207 | -0.421 | -0.454 | -0.455 | -15.057 |
| Doxepin hydrochloride                   | 315.837 | 1229-29-4    | -4.2   | -0.2   | -1.23  | 0      | -28.245 |
| Guaifenesin (Guaiphenesin)              | 198.216 | 93-14-1      | -4.2   | -0.3   | -0.448 | -0.576 | -16.566 |
| Afatinib (BIBW2992)                     | 485.938 | 439081-18-2  | -4.199 | -0.123 | -0.982 | -0.575 | -40.023 |
| Cyromazine                              | 166.184 | 66215-27-8   | -4.198 | -0.35  | -0.116 | -0.465 | -19.155 |
| Roxatidine acetate HCl                  | 384.898 | 93793-83-0   | -4.197 | -0.168 | -1.303 | -0.608 | -34.455 |
| Camptothecin                            | 348.352 | 2114454      | -4.196 | -0.161 | -0.506 | -0.32  | -33.954 |

|                                        |         |                  |        |        |        |        |         |
|----------------------------------------|---------|------------------|--------|--------|--------|--------|---------|
| Fenspiride HCl                         | 296.792 |                  |        |        |        |        |         |
| Diclofenac Sodium                      | 318.13  | 15307-79-6       | -4.194 | -0.221 | -1.208 | -0.142 | -29.431 |
| Paroxetine HCl                         | 365.826 | 78246-49-8       | -4.192 | -0.175 | -1.129 | -0.416 | -29.66  |
| Methylbenactyzine Bromide              | 422.356 | 3166-62-9        | -4.191 | -0.168 | -1.417 | 0      | -30.617 |
| Diethylstilbestrol                     | 268.35  | 56-53-1          | -4.189 | -0.209 | -1.167 | -0.32  | -26.445 |
| Magnolol                               | 266.334 | 528-43-8         | -4.185 | -0.209 | -1.188 | -0.293 | -27.629 |
| Phenylbutazone (Butazolidin, Butatron) | 308.374 | 50-33-9          | -4.184 | -0.182 | -0.815 | -0.138 | -32.462 |
| Taurine                                | 125.147 | 107-35-7         | -4.182 | -0.597 | -0.347 | 0      | -11.813 |
| Betapar (Meprednisone)                 | 372.455 | 1247-42-3        | -4.18  | -0.155 | -0.554 | -0.004 | -31.119 |
| Loxapine Succinate                     | 445.896 | 27833-64-3       | -4.179 | -0.182 | -1.254 | 0      | -30.875 |
| Temocapril HCl                         | 513.07  | 110221-44-8      | -4.176 | -0.131 | -0.743 | -0.152 | -42.299 |
| Levobetaxolol HCl                      | 343.889 | 116209-55-3, 932 | -4.17  | -0.19  | -1.742 | -0.14  | -30.64  |
| Diiodohydroxyquinoline                 | 396.951 | 83-73-8          | -4.167 | -0.321 | -1.222 | -0.32  | -26.11  |
| Nicaraven                              | 284.313 | 79455-30-4       | -4.167 | -0.198 | -1.09  | -0.001 | -32.513 |
| Rasagiline mesylate                    | 267.344 | 161735-79-1      | -4.166 | -0.32  | -1.129 | -0.195 | -22.464 |
| Mosapride                              | 421.893 | 112885-41-3      | -4.166 | -0.144 | -1.438 | -0.141 | -39.07  |
| 10-Hydroxycamptothecin                 | 364.351 | 19685-09-7       | -4.163 | -0.154 | -0.428 | -0.068 | -34.009 |
| Prochlorperazine dimaleate salt        | 606.087 | 30718            | -4.162 | -0.166 | -1.381 | 0      | -37.43  |
| Ticlopidine hydrochloride              | 300.247 | 53885-35-1       | -4.161 | -0.245 | -1.316 | 0      | -30.318 |
| Methocarbamol (Robaxin)                | 241.241 | 532-03-6         | -4.16  | -0.245 | -0.353 | -0.435 | -25.259 |
| Ropinirole HCl                         | 296.836 | 91374-20-8       | -4.156 | -0.219 | -0.905 | -0.283 | -28.045 |
| Verteporfin (Visudyne)                 | 718.794 | 129497-78-5      | -4.156 | -0.078 | -0.605 | 0      | -42.308 |
| Procarbazine hydrochloride (Matulane)  | 257.76  | 366-70-1         | -4.156 | -0.26  | -0.848 | -0.567 | -26.214 |
| diperodon hydrochloride                | 433.928 | 537-12-2         | -4.154 | -0.143 | -1.081 | -0.476 | -41.741 |
| Anastrozole                            | 293.366 | 120511-73-1      | -4.15  | -0.189 | -0.529 | -0.048 | -31.844 |
| Amitraz                                | 293.406 | 33089-61-1       | -4.149 | -0.189 | -1.523 | 0      | -34.821 |
| Crizotinib (PF-02341066)               | 450.337 | 877399-52-5, 877 | -4.149 | -0.138 | -1.086 | -0.272 | -41.454 |
| Alfacalcidol                           | 400.637 | 41294-56-8       | -4.148 | -0.143 | -1.509 | -0.277 | -22.053 |
| Ritodrine hydrochloride (Yutopar)      | 323.814 | 23239-51-2       | -4.146 | -0.197 | -1.103 | -0.92  | -26.082 |
| Cilnidipine                            | 492.52  | 132203-70-4      | -4.145 | -0.115 | -1.018 | -0.204 | -44.465 |
| Bronopol                               | 199.988 | 52-51-7          | -4.145 | -0.461 | -0.24  | -0.145 | -12.354 |
| Chlorprothixene                        | 315.86  | 113-59-7         | -4.144 | -0.197 | -1.511 | 0      | -31.553 |
| Boceprevir                             | 519.677 | 394730-60-0      | -4.144 | -0.112 | -1.08  | -0.31  | -40.573 |
| Ifenprodil Tartrate                    | 800.976 | 23210-58-4       | -4.138 | -0.172 | -1.093 | -0.292 | -30.903 |
| Bendamustine HCL                       | 394.724 | 3543-75-7        | -4.137 | -0.18  | -0.602 | -0.098 | -30.621 |

|                                  |         |             |        |        |        |        |         |
|----------------------------------|---------|-------------|--------|--------|--------|--------|---------|
| Acetyllecine                     | 173.21  | 99-15-0     | -4.134 | -0.345 | -0.296 | -0.159 | -17.737 |
| Rilpivirine                      | 366.419 | 500287-72-9 | -4.128 | -0.147 | -0.957 | -0.121 | -39.449 |
| Tolterodine tartrate (Detrol LA) | 475.574 | 124937-52-6 | -4.128 | -0.172 | -1.195 | -0.16  | -29.993 |
| Sunitinib Malate                 | 532.561 | 341031-54-7 | -4.127 | -0.142 | -1.05  | -0.16  | -40.032 |
| Brompheniramine hydrogen maleate | 435.312 | 980-71-2    | -4.125 | -0.217 | -1.409 | -0.165 | -29.449 |
| Itopride hydrochloride           | 394.892 | 122892-31-3 | -4.124 | -0.159 | -1.34  | -0.32  | -38.312 |
| Isavuconazole                    | 437.465 | 241479-67-4 | -4.124 | -0.133 | -1.315 | 0      | -39.802 |
| Trihexyphenidyl hydrochloride    | 337.927 | 52-49-3     | -4.12  | -0.187 | -1.143 | -0.16  | -26.55  |
| Metaxalone                       | 221.252 | 1665-48-1   | -4.118 | -0.257 | -0.732 | -0.342 | -24.636 |
| Bimatoprost                      | 415.566 | 155206-00-1 | -4.117 | -0.137 | -0.859 | -0.418 | -37.824 |
| Acitretin                        | 326.429 | 55079-83-9  | -4.113 | -0.171 | -1.223 | 0      | -27.178 |
| Tilorone dihydrochloride         | 483.471 | 27591-69-1  | -4.106 | -0.137 | -2.002 | -0.224 | -38.279 |
| Betaine                          | 117.146 | 107-43-7    | -4.105 | -0.513 | -0.265 | -0.152 | -10.705 |
| Dibucaine (Cinchocaine) HCl      | 379.924 | 22616       | -4.105 | -0.164 | -1.485 | -0.261 | -37.526 |
| Netupitant                       | 578.592 | 290297-26-6 | -4.101 | -0.1   | -0.959 | 0      | -48.219 |
| Mycophenolic acid                | 320.337 | 24280-93-1  | -4.1   | -0.178 | -0.48  | -0.184 | -29.207 |
| Bromhexine HCl                   | 412.591 | 611-75-6    | -4.1   | -0.228 | -1.258 | -0.215 | -27.315 |
| Naltrexone HCl                   | 377.862 | 16676-29-2  | -4.099 | -0.164 | -0.787 | 0      | -27.074 |
| Choline Chloride                 | 139.624 | 67-48-1     | -4.092 | -0.585 | -0.366 | -0.475 | -9.391  |
| Plerixafor                       | 502.782 | 110078-46-1 | -4.091 | -0.114 | -1.539 | -0.16  | -46.434 |
| Rupatadine Fumarate              | 532.03  | 182349-12-8 | -4.089 | -0.136 | -1.212 | 0      | -38.386 |
| Lomustine (CeeNU)                | 233.695 | 13010-47-4  | -4.088 | -0.273 | -0.855 | -0.32  | -25.613 |
| Gadodiamide Hydrate              | 591.672 | 122795-43-1 | -4.086 | -0.141 | -0.738 | -0.64  | -31.002 |
| Valpromide                       | 143.227 | 2430-27-5   | -4.083 | -0.408 | -0.848 | -0.336 | -16.293 |
| Eplerenone                       | 414.491 | 107724-20-9 | -4.083 | -0.136 | -1.048 | 0      | -42.506 |
| Catharanthine                    | 336.427 | 2468-21-5   | -4.079 | -0.163 | -1.444 | 0      | -31.043 |
| Thiotepa (Thioplex)              | 189.218 | 52-24-4     | -4.078 | -0.371 | -0.803 | 0      | -25.699 |
| Promethazine HCl                 | 320.88  | 58-33-3     | -4.077 | -0.204 | -0.848 | -0.056 | -30.864 |
| Mepivacaine HCl                  | 282.809 | 1722-62-9   | -4.076 | -0.226 | -1.133 | -0.015 | -26.721 |
| Amlodipine (Norvasc)             | 408.876 | 88150-42-9  | -4.074 | -0.146 | -1.057 | -0.468 | -38.522 |
| Empagliflozin (BI10773)          | 450.909 | 864070-44-0 | -4.073 | -0.131 | -0.733 | 0      | -27.394 |
| Solifenacin succinate            | 480.553 | 242478-38-2 | -4.071 | -0.151 | -1.157 | 0      | -36.994 |
| DL-Carnitine hydrochloride       | 197.66  | 461-05-2    | -4.06  | -0.369 | -0.164 | -0.082 | -14.244 |
| Propafenone HCl                  | 341.444 | 34183-22-7  | -4.059 | -0.162 | -1.257 | -0.016 | -37.248 |
| Rocuronium bromide               | 609.678 | 119302-91-9 | -4.058 | -0.107 | -1.829 | -0.002 | -34.415 |

|                                               |         |             |        |        |        |        |         |
|-----------------------------------------------|---------|-------------|--------|--------|--------|--------|---------|
| Efavirenz                                     | 315.675 | 154598-52-4 | -4.056 | -0.193 | -0.702 | -0.32  | -31.654 |
| Ethylparaben                                  | 166.174 | 120-47-8    | -4.055 | -0.338 | -0.54  | -0.16  | -21.288 |
| Clopidogrel (Plavix)                          | 419.9   | 120202-66-6 | -4.055 | -0.193 | -1.147 | -0.153 | -32.711 |
| cis-Aconitic acid                             | 174.108 | 585-84-2    | -4.053 | -0.338 | -0.088 | -0.07  | -14.461 |
| Climbazole                                    | 292.761 | 38083-17-9  | -4.048 | -0.202 | -0.537 | -0.412 | -28.143 |
| Ipriflavone                                   | 280.318 | 35212-22-7  | -4.047 | -0.193 | -1.118 | 0      | -33.208 |
| S-Ruxolitinib                                 | 306.365 | 941685-37-6 | -4.045 | -0.176 | -1.411 | 0      | -34.444 |
| Phenytoin sodium (Dilantin)                   | 274.25  | 630-93-3    | -4.045 | -0.213 | -0.429 | -0.388 | -28.949 |
| Atropine sulfate monohydrate                  | 694.833 | 5908-99-6   | -4.045 | -0.193 | -0.867 | -0.28  | -26.412 |
| Rifampin                                      | 822.94  | 13292-46-1  | -4.042 | -0.069 | -0.976 | -0.101 | -43.246 |
| Etoposide (VP-16)                             | 588.557 |             |        |        |        |        |         |
| Adapalene                                     | 412.52  | 106685-40-9 | -4.033 | -0.13  | -1.217 | 0      | -35.596 |
| Ranitidine Hydrochloride                      | 350.865 | 66357-59-3  | -4.033 | -0.192 | -1.42  | -0.16  | -32.436 |
| Brucine sulfate salt hydrate                  | 510.557 |             |        |        |        |        |         |
|                                               | -3.672  | 243.934     | -0.013 | -0.009 | 0.018  | 0.008  | -0.113  |
| Vardenafil Hydrochloride Trihydrate (Vivanza) | 579.11  | 224785-90-4 | -4.031 | -0.119 | -0.672 | 0      | -46.3   |
| Gabexate mesylate                             | 417.477 | 56974-61-9  | -4.029 | -0.175 | -1.229 | -0.225 | -29.609 |
| Cloxacillin sodium                            | 475.878 | 7081-44-9   | -4.028 | -0.139 | -0.827 | 0      | -34.512 |
| Etravirine (TMC125)                           | 435.277 | 269055-15-4 | -4.025 | -0.144 | -1.005 | 0      | -42.716 |
| Picropodophyllin (PPP)                        | 414.405 | 477-47-4    | -4.021 | -0.134 | -1.113 | -0.087 | -36.274 |
| Eprazinone 2HCl                               | 453.445 | 10402-53-6  | -4.016 | -0.143 | -1.332 | 0      | -38.956 |
| Budesonide                                    | 430.534 | 51333-22-3  | -4.014 | -0.129 | -0.728 | -0.152 | -27.93  |
| Methacholine chloride                         | 195.687 | 62-51-1     | -4.013 | -0.365 | -0.495 | -0.09  | -17.527 |
| Gallamine triethiodide (Flaxedil)             | 891.529 | 65-29-2     | -4.009 | -0.111 | -1.59  | 0      | -39.603 |
| Cefuroxime sodium                             | 446.367 | 56238-63-2  | -3.999 | -0.138 | -0.744 | -0.07  | -36.402 |
| Malotilate                                    | 288.383 | 59937-28-9  | -3.996 | -0.222 | -0.888 | -0.396 | -31.638 |
| Azlocillin sodium salt                        | 484.481 | 37091-65-9  | -3.995 | -0.125 | -0.98  | 0      | -46.908 |
| Tolperisone HCl                               | 281.821 | 3644-61-9   | -3.995 | -0.222 | -1.19  | 0      | -25.085 |
| Benzotropine mesylate                         | 403.535 | 132-17-2    | -3.993 | -0.174 | -1.619 | 0      | -30.718 |
| Diphenidol HCl                                | 345.906 | 3254-89-5   | -3.985 | -0.173 | -1.4   | -0.162 | -28.569 |
| Gestodene                                     | 310.43  | 60282-87-3  | -3.985 | -0.173 | -1.002 | 0      | -28.223 |
| Betaxolol (Betoptic)                          | 307.428 | 659-18-7    | -3.982 | -0.181 | -1.93  | 0      | -35.084 |
| Imatinib Mesylate (STI571)                    | 589.708 | 220127-57-1 | -3.982 | -0.108 | -1.443 | -0.167 | -48.027 |
| Sulfabenzamide                                | 276.311 | 127-71-9    | -3.98  | -0.209 | -0.403 | -0.148 | -29.43  |
| Colchicine                                    | 399.437 | 64-86-8     | -3.974 | -0.137 | -1.397 | -0.014 | -39.556 |



|                                        |          |                  |        |        |        |        |         |
|----------------------------------------|----------|------------------|--------|--------|--------|--------|---------|
| Orphenadrine citrate (Norflex)         | 461.505  | 4682-36-4        | -3.972 | -0.199 | -1.421 | -0.198 | -25.203 |
| Anamorelin                             | 546.704  | 249921-19-5      | -3.971 | -0.099 | -0.49  | -0.34  | -44.523 |
| Artesunate                             | 384.421  | 88495-63-0       | -3.97  | -0.147 | -0.389 | -0.187 | -29.697 |
| Nitrendipine                           | 360.361  | 39562-70-4       | -3.97  | -0.153 | -0.649 | -0.32  | -38.457 |
| Vismodegib (GDC-0449)                  | 421.297  | 879085-55-9      | -3.969 | -0.147 | -0.896 | 0      | -40.025 |
| Sunitinib                              | 398.474  | 557795-19-4      | -3.967 | -0.137 | -0.93  | -0.16  | -39.825 |
| Rosuvastatin Calcium                   | 1001.137 | 147098-20-2      | -3.966 | -0.12  | -0.393 | -0.32  | -36.675 |
| Amorolfine Hydrochloride               | 353.97   | 78613-38-4       | -3.966 | -0.172 | -1.159 | -0.32  | -31.38  |
| Imperatorin                            | 270.28   | 482-44-0         | -3.965 | -0.198 | -0.956 | 0      | -29.688 |
| Mifepristone (Mifeprex)                | 429.594  | 84371-65-3       | -3.965 | -0.124 | -1.263 | 0      | -37.727 |
| Gamma-Oryzanol                         | 602.886  | 11042-64-1       | -3.962 | -0.09  | -1.287 | -0.08  | -43.473 |
| Amprenavir (Agenerase)                 | 505.627  | 161814-49-9      | -3.959 | -0.113 | -1.192 | 0      | -41.237 |
| Captopril (Capoten)                    | 217.285  | 62571-86-2       | -3.956 | -0.283 | -0.602 | -0.152 | -24.751 |
| guanethidine sulfate                   | 494.695  | 21952            | -3.954 | -0.282 | -0.56  | -0.307 | -19.694 |
| Reboxetine mesylate                    | 409.496  | 98769-84-7       | -3.953 | -0.172 | -1.41  | -0.32  | -27.907 |
| Levodropropizine                       | 236.31   | 99291-25-5       | -3.95  | -0.232 | -0.764 | 0      | -21.279 |
| Azathramycin                           | 734.958  | 76801-85-9       | -3.947 | -0.077 | -0.793 | -0.272 | -38.48  |
| Hederagenin                            | 472.7    | 465-99-6         | -3.945 | -0.116 | -1.236 | -0.13  | -28.158 |
| Carmofur                               | 257.261  | 61422-45-5       | -3.94  | -0.219 | -0.81  | -0.16  | -25.877 |
| Chlormezanone (Trancopal)              | 273.736  | 80-77-3          | -3.937 | -0.232 | -0.613 | 0      | -27.059 |
| Sitafloxacin hydrate                   | 873.674  | 163253-35-8, 163 | -3.934 | -0.14  | -1.036 | 0      | -35.312 |
| Tenofovir Disoproxil Fumarate          | 635.515  | 202138-50-9      | -3.932 | -0.112 | -0.665 | -0.212 | -49.653 |
| Clomipramine hydrochloride (Anafranil) | 351.313  | 17321-77-6       | -3.93  | -0.179 | -0.918 | 0      | -32.731 |
| Etretinate                             | 354.483  | 54350-48-0       | -3.929 | -0.151 | -1.887 | 0      | -36.52  |
| Molsidomine                            | 242.232  | 25717-80-0       | -3.929 | -0.231 | -0.613 | -0.133 | -25.349 |
| Ceritinib (LDK378)                     | 558.135  | 1032900-25-6     | -3.928 | -0.103 | -1.477 | 0      | -49.558 |
| Pimavanserin                           | 1005.196 | 706782-28-7      | -3.924 | -0.127 | -1.305 | 0      | -40.435 |
| Chlorpheniramine Maleate               | 390.861  | 113-92-8         | -3.917 | -0.206 | -1.351 | -0.014 | -28.821 |
| Cinnarizine                            | 368.514  | 298-57-7         | -3.909 | -0.14  | -1.324 | -0.031 | -34.231 |
| Pentoxyverine Citrate                  | 437.47   | 23142-01-0       | -3.907 | -0.156 | -1.001 | -0.16  | -30.515 |
| Cisapride hydrate                      | 483.961  | 260779-88-2      | -3.901 | -0.122 | -1.456 | -0.16  | -34.51  |
| Ketotifen fumarate (Zaditor)           | 425.497  | 34580-14-8       | -3.9   | -0.177 | -0.884 | 0      | -29.725 |
| Fluphenazine (dihydrochloride)         | 510.443  | 146-56-5         | -3.894 | -0.13  | -0.841 | -0.608 | -35.382 |
| Deflazacort (Calcort)                  | 441.517  | 14484-47-0       | -3.891 | -0.122 | -0.862 | -0.16  | -33.559 |
| Torcetrapib (CP-529414)                | 600.473  | 262352-17-0      | -3.88  | -0.095 | -0.463 | -0.207 | -38.454 |

|                                             |         |             |        |        |        |        |         |
|---------------------------------------------|---------|-------------|--------|--------|--------|--------|---------|
| Nicorandil (Ikorel)                         | 211.175 | 65141-46-0  | -3.879 | -0.259 | -0.784 | -0.419 | -25.529 |
| Terbinafine                                 | 291.43  | 91161-71-6  | -3.879 | -0.176 | -1.581 | -0.014 | -31.184 |
| Vitamin E                                   | 430.706 | 21590       | -3.872 | -0.125 | -1.713 | -0.229 | -30.553 |
| Binimetinib (MEK162, ARRY-162, ARRY-438162) | 441.227 | 606143-89-9 | -3.871 | -0.143 | -0.567 | -0.16  | -34.476 |
| Quetiapine fumarate (Seroquel)              | 883.086 | 111974-72-2 | -3.87  | -0.143 | -0.855 | -0.263 | -29.422 |
| Benzylamine Hydrochloride                   | 345.866 | 132-69-4    | -3.868 | -0.168 | -1.294 | 0      | -33.47  |
| Milnacipran HCl                             | 282.809 | 101152-94-7 | -3.867 | -0.215 | -0.904 | -0.27  | -24.074 |
| trimipramine maleate                        | 410.506 | 521-78-8    | -3.866 | -0.176 | -0.8   | 0      | -30.581 |
| Valnemulin HCl                              | 601.281 | 133868-46-9 | -3.862 | -0.099 | -1.036 | -0.455 | -38.475 |
| Topotecan HCl                               | 457.907 | 119413-54-6 | -3.86  | -0.125 | -0.669 | -0.16  | -35.243 |
| Dextrose (D-glucose)                        | 180.156 | 50-99-7     | -3.858 | -0.322 | -0.5   | 0      | -19.984 |
| clofocetol                                  | 365.337 | 37693-01-9  | -3.854 | -0.161 | -0.961 | -0.16  | -31.645 |
| IMipraMine hydrochloride                    | 316.868 | 113-52-0    | -3.853 | -0.183 | -0.877 | 0      | -30.125 |
| Docusate Sodium                             | 444.558 | 577-11-7    | -3.846 | -0.137 | -1.837 | -0.241 | -30.216 |
| Aspartame                                   | 294.303 | 22839-47-0  | -3.845 | -0.183 | -0.389 | -0.919 | -27.757 |
| Alcaftadine                                 | 307.39  | 147084-10-4 | -3.843 | -0.167 | -0.429 | -0.118 | -30.994 |
| Terbinafine hydrochloride (Lamisil)         | 327.891 | 78628-80-5  | -3.842 | -0.175 | -1.615 | 0      | -30.929 |
| Dehydroandrographolide                      | 332.434 | 134418-28-3 | -3.837 | -0.16  | -1.09  | 0      | -25.56  |
| Simvastatin (Zocor)                         | 418.566 | 79902-63-9  | -3.833 | -0.128 | -0.96  | -0.32  | -31.484 |
| Glucosamine sulfate                         | 277.25  | 29031-19-4  | -3.831 | -0.319 | -0.591 | -0.431 | -18.727 |
| Monobenzene (Benoquin)                      | 200.233 | 103-16-2    | -3.83  | -0.255 | -0.88  | -0.16  | -22.954 |
| Citalopram HBr                              | 405.304 | 59729-32-7  | -3.829 | -0.16  | -0.982 | -0.192 | -32.613 |
| arbinoxaMine Maleate                        | 406.86  | 3505-38-2   | -3.824 | -0.191 | -1.128 | -0.192 | -29.88  |
| Lidocaine (Alphacaine)                      | 234.337 | 137-58-6    | -3.823 | -0.225 | -1.19  | -0.08  | -26.14  |
| Escitalopram Oxalate                        | 414.427 | 219861-08-2 | -3.822 | -0.159 | -0.975 | -0.194 | -32.601 |
| All-trans Retinoic Acid (Tretinoin)         | 300.435 | 302-79-4    | -3.819 | -0.174 | -0.965 | 0      | -27.381 |
| Chenodeoxycholic acid                       | 392.572 | 474-25-9    | -3.816 | -0.136 | -0.921 | -0.085 | -24.459 |
| Oxybutynin chloride                         | 393.947 | 1508-65-2   | -3.813 | -0.147 | -1.197 | 0      | -29.101 |
| Capsaicin                                   | 305.412 | 404-86-4    | -3.812 | -0.173 | -1.48  | -0.124 | -30.851 |
| Benserazide HCl                             | 293.704 | 14919-77-8  | -3.808 | -0.212 | -0.899 | -0.32  | -26.061 |
| Artemether                                  | 298.375 | 71963-77-4  | -3.808 | -0.181 | -0.823 | 0      | -26.137 |
| Etonogestrel                                | 324.457 | 54048-10-1  | -3.807 | -0.159 | -0.922 | 0      | -28.321 |
| Clarithromycin (Biaxin, Klacid)             | 747.953 | 81103-11-9  | -3.804 | -0.073 | -0.542 | -0.288 | -28.493 |
| Isotretinoin                                | 300.435 | 4759-48-2   | -3.799 | -0.173 | -1.002 | 0      | -26.185 |
| Fesoterodine Fumarate                       | 527.649 | 286930-03-8 | -3.798 | -0.127 | -0.908 | -0.321 | -34.81  |

|                                    |         |             |        |        |        |        |         |
|------------------------------------|---------|-------------|--------|--------|--------|--------|---------|
| Calcipotriene                      | 412.605 | 112965-21-6 | -3.798 | -0.127 | -1.248 | -0.456 | -26.521 |
| Pyrilamine maleate                 | 401.456 | 59-33-6     | -3.792 | -0.181 | -1.224 | -0.163 | -31.301 |
| Doxapram HCl                       | 432.983 | 7081-53-0   | -3.788 | -0.135 | -0.757 | -0.317 | -33.2   |
| Paeoniflorin                       | 480.462 | 23180-57-6  | -3.788 | -0.111 | -0.8   | 0      | -34.769 |
| Dronedarone HCl (Multaq)           | 593.217 | 141625-93-6 | -3.786 | -0.097 | -1.791 | 0      | -43.512 |
| Tiagabine                          | 375.548 | 115103-54-3 | -3.772 | -0.151 | -1.047 | -0.162 | -34.247 |
| Butylparaben                       | 194.227 | 94-26-8     | -3.771 | -0.269 | -0.893 | -0.32  | -22.839 |
| Acetylcholine iodide               | 273.112 | 2260-50-6   | -3.77  | -0.377 | -0.454 | -0.141 | -16.532 |
| procyclidine hydrochloride         | 323.901 | 1508-76-5   | -3.768 | -0.179 | -0.942 | -0.16  | -23.27  |
| Benzyl isothiocyanate              | 149.213 | 622-78-6    | -3.768 | -0.377 | -0.724 | 0      | -22.78  |
| Piperacillin Sodium                | 539.537 | 59703-84-3  | -3.768 | -0.105 | -0.526 | -0.008 | -46.397 |
| Osthole (Osthol)                   | 244.286 | 484-12-8    | -3.767 | -0.209 | -0.999 | -0.05  | -31.955 |
| HMN-214                            | 424.47  | 173529-46-9 | -3.766 | -0.126 | -0.982 | 0      | -38.976 |
| Neratinib (HKI-272)                | 557.043 | 698387-09-6 | -3.765 | -0.094 | -0.807 | -0.297 | -44.59  |
| Pheniramine Maleate                | 356.416 | 132-20-7    | -3.762 | -0.209 | -1.402 | -0.024 | -26.327 |
| Sildenafil                         | 474.576 | 139755-83-2 | -3.761 | -0.114 | -0.734 | 0      | -41.807 |
| Hydroxyzine 2HCl                   | 447.826 | 2192-20-3   | -3.759 | -0.145 | -1.357 | -0.296 | -27.298 |
| disopyramide phosphate             | 437.47  | 22059-60-5  | -3.756 | -0.15  | -0.959 | -0.16  | -30.397 |
| VX-745                             | 436.262 | 209410-46-8 | -3.756 | -0.134 | -1.232 | -0.059 | -39.56  |
| Lidocaine hydrochloride            | 270.798 | 73-78-9     | -3.751 | -0.221 | -1.097 | -0.16  | -25.701 |
| Triacetin                          | 218.204 | 102-76-1    | -3.749 | -0.25  | -0.621 | -0.608 | -28.725 |
| Nedaplatin                         | 269.113 | 95734-82-0  | -3.735 | -0.623 | -0.28  | -0.32  | -10.819 |
| Fluvoxamine maleate                | 434.407 | 61718-82-9  | -3.735 | -0.17  | -0.54  | -0.608 | -24.129 |
| Azelastine hydrochloride (Astelin) | 418.359 | 79307-93-0  | -3.725 | -0.138 | -1.078 | -0.015 | -36.744 |
| Erlotinib(OSI-744)                 | 429.897 | 183319-69-9 | -3.722 | -0.128 | -0.882 | -0.16  | -40.479 |
| Piperonyl butoxide                 | 338.438 | 18693       | -3.722 | -0.155 | -1.395 | -0.32  | -34.926 |
| Tripelennamine HCl                 | 291.819 | 154-69-8    | -3.721 | -0.196 | -1.224 | 0      | -28.603 |
| Alprostadil(Caverject)             | 354.481 | 745-65-3    | -3.711 | -0.148 | -1.679 | -0.16  | -26.691 |
| Imatinib (STI571)                  | 493.603 | 152459-95-5 | -3.709 | -0.1   | -1.373 | 0      | -54.656 |
| Nicergoline                        | 484.386 | 27848-84-6  | -3.708 | -0.12  | -0.772 | -0.32  | -40.741 |
| Bambuterol HCl                     | 403.901 | 81732-46-9  | -3.707 | -0.143 | -0.586 | -0.44  | -34.144 |
| Isradipine (Dynacirc)              | 371.387 | 75695-93-1  | -3.707 | -0.137 | -0.609 | -0.054 | -38.466 |
| Xylose                             | 150.13  | 25990-60-7  | -3.707 | -0.371 | -0.513 | 0      | -16.563 |
| Bosentan Hydrate                   | 569.629 | 157212-55-0 | -3.702 | -0.095 | -0.812 | 0      | -43.476 |
| Felodipine (Plendil)               | 384.254 | 72509-76-3  | -3.7   | -0.148 | -0.717 | -0.306 | -38.788 |

|                                       |         |                  |        |        |        |        |         |
|---------------------------------------|---------|------------------|--------|--------|--------|--------|---------|
| Carbenoxolone disodium                | 614.72  | 7421-40-1        | -3.697 | -0.09  | -0.87  | -0.214 | -37.947 |
| Sodium Gluconate                      | 218.137 | 527-07-1         | -3.695 | -0.284 | -0.494 | 0      | -18.964 |
| Amisulpride                           | 369.479 | 71675-85-9       | -3.68  | -0.147 | -0.508 | 0      | -35.804 |
| Arbidol HCl                           | 513.875 | 131707-23-8      | -3.678 | -0.127 | -1.658 | 0      | -44.133 |
| Pantoprazole sodium                   | 405.352 | 138786-67-1      | -3.674 | -0.141 | -1.043 | -0.139 | -28.556 |
| Arteether                             | 312.401 | 75887-54-6       | -3.672 | -0.167 | -0.844 | 0      | -27.427 |
| Acetylcysteine                        | 163.195 | 616-91-1         | -3.671 | -0.367 | -0.233 | -0.118 | -19.996 |
| Quinestrol                            | 364.52  | 152-43-2         | -3.664 | -0.136 | -1.162 | 0      | -39.061 |
| Eperisone hydrochloride               | 295.847 | 56839-43-1       | -3.661 | -0.193 | -0.738 | 0      | -27.085 |
| Bupivacaine hydrochloride (Marcain)   | 324.889 | 18010-40-7       | -3.66  | -0.174 | -1.379 | 0      | -30.116 |
| Diphenhydramine HCl (Benadryl)        | 291.816 | 147-24-0         | -3.659 | -0.193 | -1.544 | 0      | -27.309 |
| Betamethasone valerate (Betnovate)    | 476.577 | 2152-44-5        | -3.657 | -0.108 | -1.241 | -0.127 | -36.247 |
| Sinomenine (Cucoline)                 | 329.39  | 115-53-7         | -3.653 | -0.152 | -0.853 | 0      | -27.229 |
| Divalproex sodium                     | 310.405 | 76584-70-8       | -3.652 | -0.365 | -0.934 | -0.23  | -14.776 |
| camylofine chlorhydrate               | 393.391 | 54-30-8          | -3.636 | -0.158 | -1.024 | -0.16  | -30.721 |
| Azelnidipine                          | 582.646 | 123524-52-7      | -3.634 | -0.085 | -0.318 | -0.16  | -48.314 |
| Rivastigmine tartrate (Exelon)        | 400.424 | 129101-54-8      | -3.63  | -0.202 | -1.171 | 0      | -28.167 |
| Pramiracetam                          | 269.383 | 68497-62-1       | -3.621 | -0.191 | -0.637 | -0.32  | -26.151 |
| Testosterone Enanthate                | 400.594 | 315-37-7         | -3.615 | -0.125 | -1.057 | -0.085 | -36.101 |
| Rivastigmine                          | 250.337 | 123441-03-2      | -3.612 | -0.201 | -1.189 | 0      | -28.165 |
| Cyproterone acetate                   | 416.938 | 427-51-0         | -3.611 | -0.125 | -0.864 | 0      | -33.851 |
| Fosinopril sodium (Monopril)          | 585.644 | 88889-14-9       | -3.606 | -0.092 | -0.556 | -0.312 | -43.701 |
| Diethylcarbamazine (citrate)          | 391.417 | 1642-54-2        | -3.605 | -0.258 | -0.595 | 0      | -20.724 |
| Prilocaine                            | 220.311 | 721-50-6         | -3.603 | -0.225 | -1.038 | -0.186 | -26.034 |
| Desogestrel                           | 310.473 | 54024-22-5       | -3.598 | -0.156 | -1.015 | 0      | -25.519 |
| Propiverine hydrochloride             | 403.942 | 54556-98-8       | -3.591 | -0.133 | -1.361 | 0      | -36.701 |
| D-Mannitol (Osmitol)                  | 182.172 | 69-65-8          | -3.586 | -0.299 | -0.318 | 0      | -14.195 |
| Dimethyl Fumarate                     | 144.125 | 624-49-7         | -3.585 | -0.359 | -0.086 | -0.4   | -21.044 |
| Danoprevir (ITMN-191)                 | 731.831 | 850876-88-9, 916 | -3.583 | -0.07  | -1.42  | -0.317 | -56.142 |
| Butamben                              | 193.242 | 94-25-7          | -3.582 | -0.256 | -0.801 | -0.349 | -22.726 |
| Scopolamine hydrobromide              | 384.265 | 114-49-8         | -3.582 | -0.163 | -0.277 | -0.344 | -24.656 |
| Miltefosine (Hexadecylphosphocholine) | 407.568 | 58066-85-6       | -3.581 | -0.133 | -1.824 | -0.16  | -34.361 |
| Chloroprocaine HCl                    | 307.216 | 3858-89-7        | -3.581 | -0.199 | -1.101 | -0.083 | -28.442 |
| Vitamin D3 (Cholecalciferol)          | 384.638 | 67-97-0          | -3.579 | -0.128 | -1.21  | -0.16  | -23.266 |
| Bedaquiline fumarate                  | 671.577 | 845533-86-0      | -3.577 | -0.097 | -1.413 | 0      | -42.915 |

|                                       |         |              |        |        |        |        |         |
|---------------------------------------|---------|--------------|--------|--------|--------|--------|---------|
| Retapamulin                           | 517.763 | 224452-66-8  | -3.562 | -0.099 | -0.974 | -0.251 | -31.841 |
| Azithromycin                          | 748.984 | 83905-01-5   | -3.56  | -0.068 | -0.639 | -0.2   | -40.931 |
| Chloroambucil                         | 304.212 | 305-03-3     | -3.558 | -0.187 | -0.733 | 0      | -26.404 |
| Diclazuril                            | 407.638 | 101831-37-2  | -3.557 | -0.137 | -0.603 | -0.078 | -38.862 |
| Tamoxifen Citrate (Nolvadex)          | 563.638 | 54965-24-1   | -3.553 | -0.127 | -0.968 | -0.174 | -33.749 |
| Tamoxifen                             | 563.638 | ICI 46474    | -3.553 | -0.127 | -0.968 | -0.174 | -33.749 |
| Allylthiourea                         | 116.185 | 109-57-9     | -3.548 | -0.507 | -0.206 | -0.456 | -14.156 |
| Adefovir Dipivoxil (Preveon, Hepsera) | 501.471 | 142340-99-6  | -3.543 | -0.104 | -0.53  | -0.373 | -40.541 |
| Atenolol                              | 266.336 | 29122-68-7   | -3.522 | -0.185 | -1.105 | -0.785 | -26.479 |
| Levobupivacaine HCl                   | 324.889 | 27262-48-2   | -3.518 | -0.168 | -1.21  | 0      | -29.444 |
| Meclizine dihydrochloride             | 463.87  | 1104-22-9    | -3.499 | -0.125 | -1.148 | 0      | -35.595 |
| Afatinib (BIBW2992) Dimaleate         | 718.083 | 850140-73-7  | -3.498 | -0.103 | -0.474 | -0.333 | -39.843 |
| Fusidate Sodium                       | 538.691 | 751-94-0     | -3.496 | -0.094 | -1.495 | -0.304 | -29.038 |
| Ursolic acid (Malol)                  | 456.7   | 77-52-1      | -3.495 | -0.106 | -0.993 | 0      | -40.686 |
| Azithromycin Dihydrate                | 785.015 | 117772-70-0  | -3.494 | -0.067 | -0.665 | 0      | -36.636 |
| Bisoprolol fumarate                   | 441.515 | 104344-23-2  | -3.486 | -0.152 | -0.276 | -0.831 | -24.252 |
| Apixaban                              | 459.497 | 503612-47-3  | -3.47  | -0.102 | -0.888 | 0      | -38.439 |
| Sildenafil Mesylate                   | 570.682 | 1308285-21-3 | -3.47  | -0.105 | -0.371 | 0      | -44.043 |
| Mesna (Uromitexan, Mesnex)            | 164.179 | 19767-45-4   | -3.468 | -0.495 | -0.047 | -0.48  | -8.579  |
| Erythromycin Cyclocarbonate           | 759.921 | 55224-05-0   | -3.468 | -0.065 | -0.848 | -0.043 | -39.999 |
| Benactyzine hydrochloride             | 363.878 | 57-37-4      | -3.466 | -0.144 | -0.65  | 0      | -29.21  |
| Lappaconitine                         | 584.7   | 32854-75-4   | -3.455 | -0.082 | -0.708 | -0.142 | -36.606 |
| Ginkgolide C                          | 440.398 | 15291-76-6   | -3.452 | -0.111 | -0.241 | 0      | -25.577 |
| Rilmenidine Phosphate                 | 278.242 | 85409-38-7   | -3.449 | -0.265 | -0.858 | -0.16  | -20.104 |
| Cyclophosphamide monohydrate          | 279.101 | 6055-19-2    | -3.447 | -0.246 | -0.227 | -0.111 | -23.36  |
| pimozide                              | 461.546 | 2062-78-4    | -3.442 | -0.101 | -0.638 | 0      | -43.346 |
| Ciclesonide                           | 540.688 | 126544-47-6  | -3.428 | -0.088 | -0.947 | -0.134 | -39.348 |
| Clevidipine Butyrate                  | 456.316 | 167221-71-8  | -3.423 | -0.114 | -0.577 | -0.216 | -45.76  |
| Sodium butyrate                       | 110.087 | 156-54-7     | -3.414 | -0.569 | -0.109 | -0.16  | -6.159  |
| Acebutolol HCl                        | 372.887 | 34381-68-5   | -3.406 | -0.142 | -0.854 | -0.127 | -35.231 |
| Procainamide HCl                      | 271.786 | 614-39-1     | -3.404 | -0.2   | -0.759 | -0.228 | -26.347 |
| Neticonazole Hydrochloride            | 338.895 | 130773-02-3  | -3.392 | -0.162 | -1.291 | 0      | -34.614 |
| Tipifarnib (Zarnestra)                | 489.396 | 192185-72-1  | -3.392 | -0.1   | -1.121 | -0.159 | -43.702 |
| Cetirizine Dihydrochloride            | 461.81  | 83881-52-1   | -3.39  | -0.126 | -0.522 | 0      | -33.45  |
| Cyclizine 2HCl                        | 339.303 | 5897-18-7    | -3.381 | -0.169 | -1.011 | 0      | -27.832 |

|                                            |         |             |        |        |        |        |         |
|--------------------------------------------|---------|-------------|--------|--------|--------|--------|---------|
| Domiphen Bromide                           | 414.463 | 538-71-6    | -3.377 | -0.141 | -1.777 | 0      | -32.654 |
| Roflumilast (Daxas)                        | 403.207 | 162401-32-3 | -3.377 | -0.13  | -0.719 | 0      | -38.443 |
| Oxacillin sodium monohydrate               | 441.433 | 7240-38-2   | -3.362 | -0.12  | -0.667 | 0      | -40.176 |
| Daminozide                                 | 160.171 | 1596-84-5   | -3.357 | -0.305 | -0.081 | -0.338 | -17.652 |
| Mozavaptan                                 | 427.538 | 137975-06-5 | -3.356 | -0.105 | -0.92  | -0.21  | -32.526 |
| proadifen hydrochloride                    | 389.959 | 62-68-0     | -3.353 | -0.129 | -1.243 | -0.005 | -36.278 |
| Otilonium Bromide                          | 563.567 | 26095-59-0  | -3.352 | -0.096 | -1.206 | -0.095 | -38.036 |
| Perifosine (KRX-0401)                      | 461.658 | 157716-52-4 | -3.343 | -0.108 | -1.673 | -0.16  | -32.056 |
| Vitamin A Acetate                          | 328.488 | 127-47-9    | -3.333 | -0.139 | -1.128 | 0      | -35.917 |
| Ebastine                                   | 469.658 | 90729-43-4  | -3.3   | -0.094 | -1.436 | 0      | -49.781 |
| Tiopronin (Thiola)                         | 163.195 | 19392       | -3.297 | -0.33  | -0.412 | -0.152 | -18.164 |
| Procaine (Novocaine) HCl                   | 272.771 | 18756       | -3.289 | -0.193 | -1.106 | -0.163 | -26.839 |
| Fluticasone propionate (Flonase, Veramyst) | 500.571 | 80474-14-2  | -3.288 | -0.097 | -0.66  | -0.16  | -30.908 |
| Procaine                                   | 236.31  | 59-46-1     | -3.281 | -0.193 | -1.104 | -0.16  | -26.836 |
| Ibutilide fumarate                         | 885.225 | 122647-32-9 | -3.275 | -0.126 | -0.883 | -0.304 | -25.276 |
| Selexipag                                  | 496.622 | 475086-01-2 | -3.274 | -0.094 | -1.177 | 0      | -46.313 |
| oxelaidin citrate                          | 527.604 | 52432-72-1  | -3.261 | -0.136 | -1.221 | -0.014 | -32.23  |
| Clomifene citrate (Serophene)              | 598.083 | 50-41-9     | -3.257 | -0.112 | -1.324 | 0      | -37.351 |
| Ambrisentan                                | 378.421 | 177036-94-1 | -3.252 | -0.116 | -0.879 | 0      | -35.753 |
| Ropivacaine HCl                            | 310.862 | 98717-15-8  | -3.252 | -0.163 | -0.875 | 0      | -26.187 |
| Meglumine                                  | 195.214 | 6284-40-8   | -3.249 | -0.25  | -0.378 | -0.141 | -18.415 |
| Sorbitol (Glucitol)                        | 182.172 | 50-70-4     | -3.248 | -0.271 | -0.069 | -0.32  | -12.056 |
| Fumaric acid                               | 116.072 | 110-17-8    | -3.238 | -0.405 | -0.208 | -0.119 | -12.631 |
| Toremifene Citrate (Fareston, Acapodene)   | 598.083 | 89778-27-8  | -3.235 | -0.112 | -1.136 | 0      | -34.153 |
| Vitamin D2 (Ergocalciferol)                | 396.648 | 50-14-6     | -3.23  | -0.111 | -0.989 | -0.16  | -28.744 |
| Probucol                                   | 516.842 | 23288-49-5  | -3.203 | -0.092 | -1.264 | 0      | -39.319 |
| Oxybuprocaine HCl                          | 344.877 | 5987-82-6   | -3.194 | -0.145 | -0.783 | -0.32  | -33.105 |
| Fusidine                                   | 516.709 | 1859240     | -3.19  | -0.086 | -0.704 | -0.221 | -33.546 |
| Levocetirizine Dihydrochloride             | 461.81  | 130018-87-0 | -3.177 | -0.118 | -0.294 | 0      | -33.676 |
| Orlistat (Alli, Xenical)                   | 495.735 | 96829-58-2  | -3.175 | -0.091 | -1.362 | -0.4   | -44.8   |
| Xylitol                                    | 152.146 | 87-99-0     | -3.175 | -0.318 | -0.586 | 0      | -11.272 |
| Halothane                                  | 197.382 | 151-67-7    | -3.161 | -0.452 | -0.258 | 0      | -12.922 |
| Lacidipine (Lacipil, Motens)               | 455.543 | 103890-78-4 | -3.16  | -0.096 | -1.06  | 0      | -43.618 |
| Sodium Nitrite                             | 68.995  | 7632-00-0   | -3.159 | -1.053 | 0      | 0      | -1.076  |
| Oxybutynin (Ditropan)                      | 357.486 | 5633-20-5   | -3.144 | -0.121 | -0.769 | -0.309 | -33.081 |

|                                       |         |                  |        |        |        |        |         |
|---------------------------------------|---------|------------------|--------|--------|--------|--------|---------|
| 5-Aminolevulinic acid hydrochloride   | 167.591 | 1297222          | -3.116 | -0.346 | -0.168 | -0.326 | -13.509 |
| Clemastine Fumarate                   | 459.962 | 14976-57-9       | -3.104 | -0.129 | -1.022 | 0      | -32.692 |
| Doxylamine Succinate                  | 388.457 | 562-10-7         | -3.092 | -0.155 | -0.517 | -0.113 | -27.653 |
| Aminoguanidine (hydrochloride)        | 110.546 | 1937-19-5        | -3.068 | -0.614 | 0      | -0.534 | -5.956  |
| Vitamin A Palmitate                   | 524.86  | 79-81-2          | -3.028 | -0.08  | -2.368 | 0      | -41.624 |
| Erythromycin                          | 733.927 | 114-07-8         | -3.013 | -0.059 | -0.704 | 0      | -37.952 |
| Tiamulin fumarate                     | 609.814 | 55297-96-6       | -3.01  | -0.089 | -0.574 | -0.343 | -33.787 |
| Ifosfamide                            | 261.086 | 3778-73-2        | -3.004 | -0.215 | -0.399 | 0      | -25.537 |
| Enoxolone (Glycyrrhetin)              | 470.684 | 471-53-4         | -2.998 | -0.088 | -0.596 | 0      | -40.054 |
| Vinblastine sulfate                   | 909.053 | 143-67-9         | -2.971 | -0.05  | -0.565 | -0.218 | -37.956 |
| Diatrizoate sodium                    | 635.895 | 737-31-5         | -2.957 | -0.148 | -0.291 | -0.317 | -30.026 |
| BIBR-1048 (Dabigatran)                | 627.733 | 211915-06-9      | -2.953 | -0.064 | -0.765 | 0      | -50.429 |
| Disulfiram (Antabuse)                 | 296.539 | 97-77-8          | -2.944 | -0.184 | -0.516 | 0      | -26.247 |
| Vincristine Sulfate                   | 923.036 | 2068-78-2        | -2.925 | -0.049 | -0.932 | -0.028 | -36.2   |
| Trometamol                            | 121.135 | 77-86-1          | -2.918 | -0.365 | -0.301 | -0.057 | -8.284  |
| Mechlorethamine HCl                   | 192.514 | 55-86-7          | -2.913 | -0.364 | -0.574 | 0      | -17.602 |
| Pargyline hydrochloride               | 195.689 | 306-07-0         | -2.902 | -0.242 | -0.777 | 0      | -23.543 |
| Cimetidine (Tagamet)                  | 252.339 | 51481-61-9       | -2.885 | -0.17  | -1.016 | -0.678 | -23.597 |
| DicycloMine Hydrochloride             | 345.948 | 67-92-5          | -2.883 | -0.131 | -0.726 | 0      | -27.23  |
| Esmolol HCl                           | 331.835 | 81161-17-3, 8114 | -2.825 | -0.135 | -1.223 | -0.456 | -28.371 |
| Pamidronate Disodium                  | 279.033 | 57248-88-1       | -2.813 | -0.216 | -0.022 | -0.033 | -12.061 |
| Sorbic acid                           | 112.127 | 110-44-1         | -2.801 | -0.35  | -0.332 | -0.088 | -13.235 |
| Aminocaproic acid-نذغ-نذغ             | 131.173 | 60-32-2          | -2.794 | -0.31  | -0.26  | -0.563 | -11.88  |
| fosfomycin tromethamine               | 259.194 | 78964-85-9       | -2.762 | -0.345 | -0.422 | 0      | -9.619  |
| Succinic acid                         | 118.088 | 110-15-6         | -2.67  | -0.334 | -0.087 | -0.428 | -14.575 |
| Erythritol                            | 122.12  | 149-32-6         | -2.648 | -0.331 | 0      | 0      | -6.719  |
| Amifostine                            | 268.269 | 112901-68-5      | -2.572 | -0.214 | -0.566 | -0.708 | -13.597 |
| Dyclonine hydrochloride               | 325.873 | 536-43-6         | -2.537 | -0.121 | -1.137 | -0.167 | -31.111 |
| Teprenone                             | 330.547 | 6809-52-5        | -2.47  | -0.103 | -1.072 | -0.138 | -31.351 |
| Metoprolol tartrate                   | 684.815 | 392-17-7         | -2.321 | -0.122 | -1.337 | -0.345 | -28.313 |
| Metformin hydrochloride (Glucophage)  | 165.625 | 1115-70-4        | -2.313 | -0.257 | -0.154 | -0.304 | -19.362 |
| Vecuronium Bromide                    | 637.731 | 50700-72-6       | -2.311 | -0.058 | -0.458 | 0      | -23.408 |
| 2-Aminoheptane                        | 115.217 | 123-82-0         | -2.306 | -0.288 | -0.314 | -0.304 | -11.995 |
| Tetracaine hydrochloride (Pontocaine) | 300.824 | 136-47-0         | -2.278 | -0.12  | -1.52  | -0.159 | -30.29  |
| Tolbutamide                           | 270.348 | 64-77-7          | -2.204 | -0.122 | -0.903 | -0.32  | -25.76  |

|                                    |         |             |        |        |        |        |         |
|------------------------------------|---------|-------------|--------|--------|--------|--------|---------|
| Vindoline                          | 456.531 | 2182-14-1   | -2.14  | -0.065 | -0.54  | 0      | -30.593 |
| Gemfibrozil (Lopid)                | 250.333 | 25812-30-0  | -2.095 | -0.116 | -1.276 | 0      | -25.608 |
| Pramoxine HCl                      | 329.862 | 637-58-1    | -2.081 | -0.099 | -1.315 | -0.318 | -30.564 |
| Articaine HCl                      | 320.835 | 23964-57-0  | -1.984 | -0.104 | -0.635 | -0.346 | -28.596 |
| Succinylcholine Chloride Dihydrate | 397.336 | 6101-15-1   | -1.978 | -0.099 | -0.563 | -0.32  | -25.503 |
| Alverine Citrate                   | 473.559 | 5560-59-8   | -1.891 | -0.09  | -1.225 | 0      | -31.371 |
| Proparacaine HCl                   | 330.85  | 1452000     | -1.712 | -0.082 | -1.165 | -0.083 | -30.153 |
| Vorinostat (SAHA, MK0683)          | 264.32  | 149647-78-9 | -1.665 | -0.088 | -0.318 | -0.483 | -23.423 |
| Bufexamac                          | 223.268 | 2438-72-4   | -1.55  | -0.097 | -0.495 | -0.47  | -27.202 |
| L-Arginine HCl                     | 210.662 | 1119-34-2   | -1.466 | -0.122 | -0.256 | -1.066 | -12.566 |
| Ethambutol HCl                     | 277.232 | 1070-11-7   | -1.302 | -0.093 | -1.189 | -0.82  | -19.442 |
| Fudosteine                         | 179.237 | 13189-98-5  | -0.624 | -0.057 | -0.109 | -0.668 | -14.982 |
| DL-Panthenol                       | 205.251 | 16485-10-2  | -0.272 | -0.019 | -0.237 | -0.64  | -13.959 |
| D panthenol                        | 205.251 | 81-13-0     | -0.068 | -0.005 | -0.452 | -0.301 | -19.836 |
| Spermine                           | 202.34  | 71-44-3     | 1.063  | 0.076  | -1.214 | -0.499 | -22.269 |
| Azelaic acid                       | 188.221 | 123-99-9    | 1.248  | 0.096  | -0.441 | -0.11  | -19.066 |
| Lauric Acid                        | 200.318 | 143-07-7    | 1.484  | 0.106  | -1.581 | -0.136 | -15.569 |
| Zinc Undecylenate                  | 431.925 | 557-08-4    | 1.684  | 0.13   | -1.301 | -0.32  | -14.853 |
| 1-Hexadecanol                      | 242.441 | 36653-82-4  | 2.381  | 0.14   | -1.704 | -0.16  | -22.555 |
